# Supplementary material for: A robust method for measuring aminoacylation through tRNA-Seq
Source: eLife journal article supplement (doi:10.7554/elife.91554), 2023-11-13
Supplement: fig2-data2 [file elife-91554-fig2-data2-v1.zip]

# oxidation\_test\_8\_long-exp

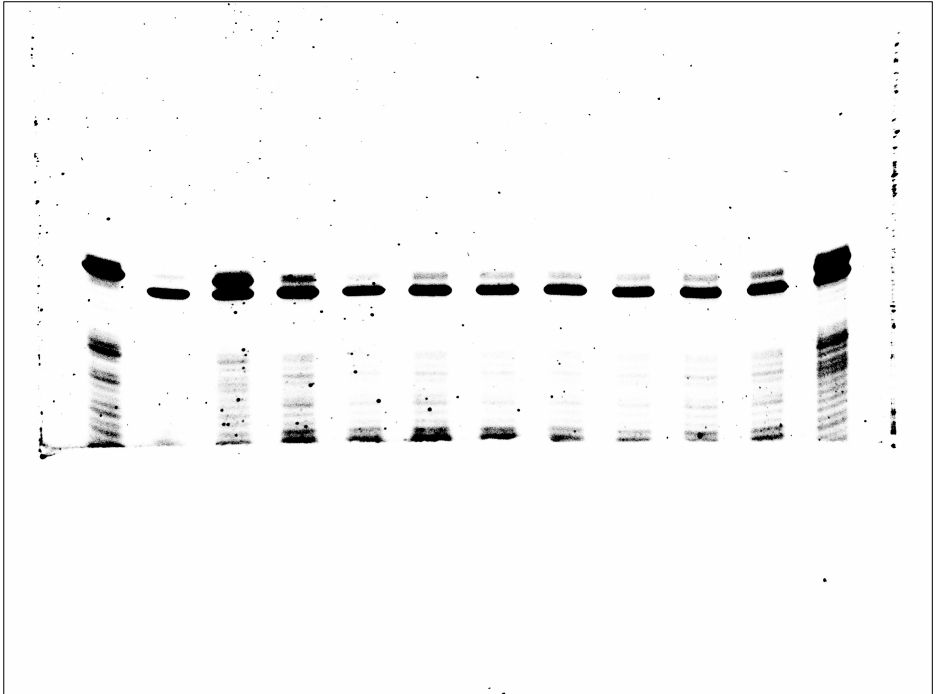

C:/Users/mshared/Desktop/Sullivan Lab/krdav/tRNAseq\_opti/oxidation\_test

Printed: 10/25/2022 7:41 PM

Page 1 of 1
