# Supplementary material for: A robust method for measuring aminoacylation through tRNA-Seq
Source: eLife journal article supplement (doi:10.7554/elife.91554), 2023-11-13
Supplement: fig2-figsupp3-data1 [file elife-91554-fig2-figsupp3-data1-v1.zip]

# ligation\_opti\_1\_no-quant

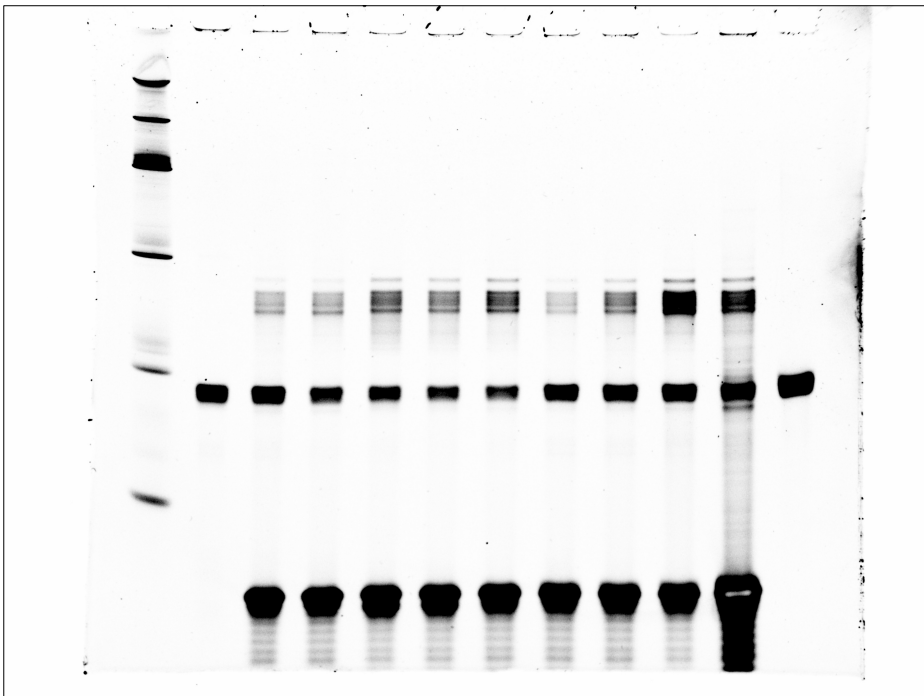

Location: C:/Users/mshared/Desktop/Sullivan Lab/krdav/tRNAseq\_opti

Printed: 4/25/2023 2:52 PM

Page 1 of 1
