# Supplementary material for: A robust method for measuring aminoacylation through tRNA-Seq
Source: eLife journal article supplement (doi:10.7554/elife.91554), 2023-11-13
Supplement: fig2-figsupp4-data1 [file elife-91554-fig2-figsupp4-data1-v1.zip]

## Ecoli-Lys-CC\_ligation\_Sp1-9

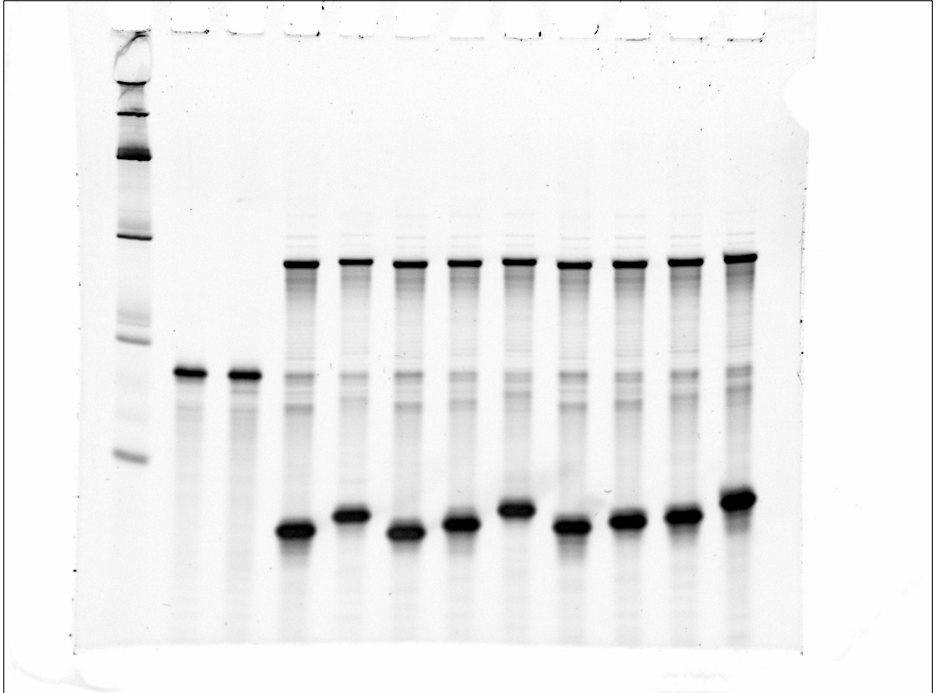

Location: C:/Users/mshared/Desktop/Sullivan Lab/krdav/tRNAseq\_pub

Printed: 1/30/2023 3:35 PM

Page 1 of 1
