# Supplementary material for: A robust method for measuring aminoacylation through tRNA-Seq
Source: eLife journal article supplement (doi:10.7554/elife.91554), 2023-11-13
Supplement: fig2-figsupp10-data1 [file elife-91554-fig2-figsupp10-data1-v1.zip]

# reannealing\_test\_long-exp

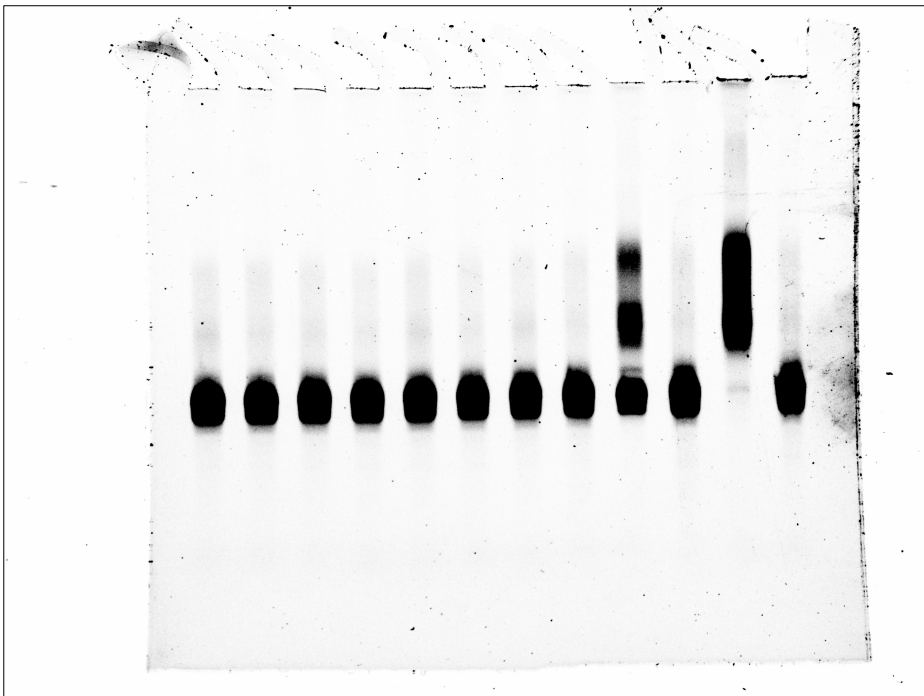

Location: C:/Users/mshared/Desktop/Sullivan Lab/krdav/tRNAseq\_opti

Printed: 11/7/2022 6:17 PM

Page 1 of 1
