# Supplementary material for: A robust method for measuring aminoacylation through tRNA-Seq
Source: eLife journal article supplement (doi:10.7554/elife.91554), 2023-11-13
Supplement: fig5-figsupp3-data2 [file elife-91554-fig5-figsupp3-data2-v1.zip]

## Thr-CCA-P\_PureExpress\_ligation-control

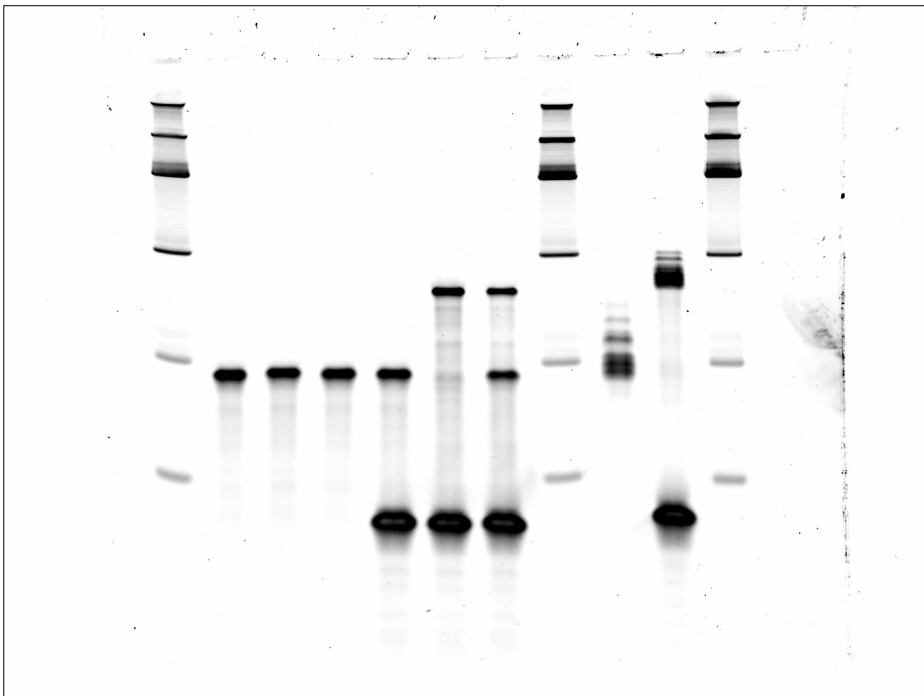

Location: C:/Users/mshared/Desktop/Sullivan Lab/krdav

Printed: 4/11/2023 4:03 PM

Page 1 of 1
