# Supplementary material for: A robust method for measuring aminoacylation through tRNA-Seq
Source: eLife. 2024 Jul 30;12:RP91554. doi: 10.7554/eLife.91554 (PMC11288633; doi:10.7554/eLife.91554)
Supplement: Figure 2—figure supplement 1—source data 1. [file elife-91554-fig2-figsupp1-data1.xlsx]

## Sheet: Fig2S1A
time	name	charge
5	Gly-GGG	20.73
30	Gly-GGG	0.83
90	Gly-GGG	0
270	Gly-GGG	0
5	His-CAC	36.23
30	His-CAC	7.46
90	His-CAC	0.63
270	His-CAC	0
5	Ile-AUU	57.09
30	Ile-AUU	13.26
90	Ile-AUU	4.79
270	Ile-AUU	0
5	iMet-AUG	24.13
30	iMet-AUG	1.28
90	iMet-AUG	0
270	iMet-AUG	0
5	Pro-CCG	12.08
30	Pro-CCG	1.87
90	Pro-CCG	0
270	Pro-CCG	0
5	Ser-AGC	43.15
30	Ser-AGC	5.32
90	Ser-AGC	1.29
270	Ser-AGC	0
5	Val-GUG	39.6
30	Val-GUG	8.26
90	Val-GUG	2.2
270	Val-GUG	1.37
