# Supplementary material for: A robust method for measuring aminoacylation through tRNA-Seq
Source: eLife. 2024 Jul 30;12:RP91554. doi: 10.7554/eLife.91554 (PMC11288633; doi:10.7554/eLife.91554)
Supplement: Figure 2—figure supplement 2—source data 1. [file elife-91554-fig2-figsupp2-data1.xlsx]

## Sheet: Fig2S2A
barcode	charge
A3	55.6423
A3	44.288
A4	51.8716
A4	44.5433
A1	46.4259
A1	35.0855
A2	55.9562
A2	48.1922
A3	55.0101
A3	47.933
A4	56.0397
A4	47.54
A1	50.9339
A1	35.5391
A3	58.6769
A3	47.1193
A2	58.0605
A2	51.2041
A1	58.4258
A1	43.6394
A2	63.7602
A2	55.4311
A1	59.908
A1	45.7231
A2	63.5288
A2	56.4708
A3	68.2786
A3	55.6052
A4	67.783
A4	58.1137
A3	56.8365
A3	44.8826
A4	62.3308
A4	49.8154
A1	52.4399
A1	35.9731
A2	58.5113
A2	47.5524
A3	58.7225
A3	42.4697
A4	58.3333
A4	46.2211
A1	52.3246
A1	35.9847
A2	55.2171
A2	48.3664
A3	59.4037
A3	46.2812
A4	59.3208
A4	48.8947
A1	51.8432
A1	49.2221
A2	61.4404
A2	60.7852
A3	61.2234
A3	59.0185
A4	60.985
A4	62.1419
A3	60.807
A3	46.6876
A4	57.6567
A4	51.7547
A1	50.9684
A1	34.5518
A2	57.5922
A2	48.6169
A3	59.0214
A3	46.8519
A4	58.4692
A4	48.318
A1	51.4638
A1	47.5357
A2	63.4422
A2	62.9461
A3	62.5937
A3	61.5536
A4	60.6605
A4	65.1246
A1	50.6706
A1	53.2113
A2	59.4304
A2	65.4365
A3	60.8966
A3	65.1173
A4	65.431
A4	55.1471
A1	49.3721
A1	57.8851
A2	64.1834
A2	68.3692
A4	60.7545
A4	67.6136
A1	52.4805
A1	35.6793
A2	55.3586
A2	45.0651
A3	57.1366
A3	44.5623
A4	55.8358
A4	47.9559
A1	45.8696
A1	35.4324
A2	54.8332
A2	46.6524
A1	53.8554
A1	33.3765
A3	61.9744
A3	48.2722
A2	60.9745
A2	49.6635
A1	52.6213
A1	36.3829
A3	57.4463
A3	48.4777
A2	60.3657
A2	50.4079
A1	53.5109
A1	37.016
A3	60.4368
A3	48.5075
A2	60.7173
A2	49.7257

## Sheet: Fig2S2B
A1-A2_diff	A2-A3_diff	A3-A4_diff
-0.988386	-11.8864	-0.813816
-1.70672	-13.3412	-0.658412
-1.99761	-14.6091	-0.569614
-2.10542	-14.3368	-0.481625
-1.58656	-14.1061	-0.771615
-0.512027	-15.2944	-0.76483
-0.861041	-13.6421	-0.512947
-0.837146	-13.5298	-0.957961
-0.239685	-13.6897	-0.371463
-0.416094	-11.6689	0.484791
0.995072	-13.609	-1.2605
-0.393793	-10.2351	0.99826
-0.104711	-13.7356	-1.0696
0.0938033	-14.0945	-7.42652
-0.0214771	-16.6721	-3.42639
-0.804636	0.992274	-0.850423
-0.00680419	3.03587	-3.0371
-0.992142	2.4162	-1.33762
-2.16342	3.7766	-0.807914
-2.83808	-20.2472	0.972771
-2.50431	-20.4857	-0.408058
-1.22363	-20.3861	-1.0212
-1.73837	-7.75113	1.23163
0.322921	-22.728	0.312847
0.554229	-21.7457	0.649984
-0.424731	-17.7227	0.578431
-3.15792	-14.7921	-0.0839001
-3.47894	-8.62498	-1.2682
-2.01839	-7.64712	0.661658
-1.90619	-5.11072	-0.298217
-1.90849	-8.25337	1.89839
-2.33517	-10.8442	-1.98777
-3.72178	-9.00429	-1.58519
-1.81975	-12.7714	-0.123778
-1.24241	-8.85238	-0.0347642
-2.32564	-9.9409	0.128524
-1.35625	-8.86322	-0.687014
-1.60617	-10.8883	0.225444
-0.848552	-1.89675	-3.03343
-1.81904	-2.47996	-1.24573
-1.52149	-1.50509	-1.46933
-2.28796	-1.74546	-0.724382
-2.30936	-2.40035	-1.40829
-1.4606	-7.89602	-0.498691
-0.210028	-5.86182	0.383112
-0.344073	-7.46614	-0.616397
-0.229591	-7.78846	-1.99867
0.319894	-6.25638	-0.366073
-1.59323	-9.46524	-0.913204
-2.44188	-10.9799	-1.29445
-1.06312	-10.2829	-0.260265
-1.61455	-10.9717	-1.49167
-0.660106	-15.2704	-1.6951
-1.43531	-11.2117	-1.2307
-0.97191	-9.7391	0.929194
-1.33787	-11.2266	-0.393445
-3.41003	-8.45084	-1.97102
-3.94389	-26.8255	-0.816637
-2.86889	-32.5876	-1.1448
-3.75573	-29.1479	3.77072
-3.93354	-7.83679	-0.0284929
-4.55727	-8.31961	-8.04745
-3.06414	-1.32851	-7.38648
-2.20703	-1.1209	-4.96111
-3.27682	-2.70855	-9.28267
-1.41985	2.35028	-5.79702
-1.46489	-0.616408	-3.79337
-1.7526	-13.1348	-4.96554
-1.16524	-6.61674	-2.62035
-0.630385	-8.02841	-8.59178
-2.14303	-7.81745	-3.4611
-1.35865	-7.18197	-2.91596
-0.591257	-6.95419	-2.16805
-6.12552	-6.66707	-3.17611
-0.945143	-7.59795	-2.28718
-9.53024	-9.62009	-3.52624
-0.9337	-5.90679	-3.92148
-14.4591	-4.89901	-2.15355
-13.5296	-6.65796	-2.42106
-9.55565	-7.78741	-7.39773
-11.3321	-6.57719	-9.3102
-11.881	-8.00215	-7.99535
-11.699	-9.95235	-15.767
-13.8569	-7.57189	-7.64224
-12.3752	-9.77071	-5.4638
-11.4926	-9.79607	-4.75751
-9.97729	-10.0264	-4.79551
-11.6095	-10.4857	-6.52669
-14.3917	-9.62388	-10.1423
-10.4473	-5.54931	-10.9947
-9.94642	-7.98002	-5.16335
-10.532	-8.81808	-7.99862
-9.94161	-8.12255	-7.44144
-7.99329	-10.6892	-5.86301
-9.05149	-9.11838	-9.52343
-2.47188	-19.1031	-8.65901
-5.66993	-18.4356	-9.2343
-7.85317	-17.8671	-7.59059
-5.59431	-3.90558	-8.15661
-7.85769	-12.3665	-7.06029
-1.96404	-10.1564	-8.12106
-16.3849	-13.843	-8.58004
-18.4336	-13.5701	-9.01642
-9.60346	-5.47856	-7.18986
-12.7844	-4.97515	-6.86662
-12.7241	-1.57453	-7.42157
-8.77514	-4.90097	-7.59852
-14.4099	-5.23196	-6.80985
-10.6984	-4.72076	-7.01397
-13.0769	-8.99766	-2.09937
-9.52923	-3.78416	-3.19008
-0.928158	-6.14426	-4.0083
-1.14646	-7.15601	-9.186
-2.83307	-4.72726	-8.90966
-2.75805	-1.64058	-8.5974
-2.28258	-1.5695	-6.81314
-8.75574	-1.27942	-10.6066
-8.92397	-1.12932	-2.29531
-11.6961	-1.36489	-1.52398
-13.6757	-4.69623	-1.51299
-11.0983	-1.69176	-5.89852
-9.04094	-4.49563	-5.74364
-2.87932	-5.06543	-8.42391
-2.54733	-7.78533	-7.11916
-3.40422	-3.0537	-9.31778
-10.948	-7.01712	-7.85227
-11.1495	-5.89342	-5.13817
-13.9545	-7.33481	-1.32907
-10.2108	-7.93511	-4.32244
-9.5832	-9.50732	-2.84574
-9.02689	-4.23866	-5.39292
-5.10765	-8.33602	-8.89744
-7.7719	-4.3293	-9.6782
-7.41602	-17.4368	-7.80299
-7.66758	-16.165	-10.3983
-6.00046	-18.0941	-7.94282
-6.20499	-4.49503	-9.19049
-4.606	-5.00021	-3.69803
-13.7556	-1.65127	-8.75344
-7.12657	-0.42952	-7.39899
-10.4028	-1.75449	-1.02963
-4.33603	-2.0931	-8.3668
-2.75574	0.400046	0.198106
-3.55368	-0.999886	-0.142309
-3.61171	-8.41928	-0.552503
-3.61735	-6.60968	-0.655816
-2.93036	-5.04082	-0.967062
-2.23144	-6.10006	-0.701128
-1.80684	-7.03179	-0.402559
-1.9666	-4.44977	-0.0817814
-0.627066	-5.995	-0.969387
-3.04917	-6.13708	-1.0868
-2.28104	-5.52118	-1.30273
-2.10667	-5.58111	0.322099
-2.19589	-1.23221	-1.03419
-4.50818	-5.74327	-0.969171
-1.18737	-5.27688	0.258522
-0.873703	-5.1408	-0.280466
-1.15583	-4.0677	-0.105166
-1.74512	-6.67848	-0.388791
-1.17306	-4.42132	-0.643629
-1.17588	-5.50232	-0.127684
-4.44331	-7.81341	-0.394125
-2.08747	-6.53945	0.121787
-0.507641	-8.24003	-0.869537
-1.34938	-6.31832	-0.507508
-0.3462	-4.67595	-1.00586
-3.49995	-5.85368	-1.4647
-4.52257	-6.92863	-1.90826
-4.24861	-6.56994	-1.48253
-2.70853	-5.57543	-1.51461
-4.31989	-6.02929	-0.467632
-5.29461	-13.156	-3.29806
-1.95251	-12.7625	-3.4797
-2.70749	-14.894	-1.24538
-3.95341	-3.70621	-0.561569
-2.51051	-9.69075	0.104955
-7.74274	-12.8305	-0.463501
-15.0616	-10.3794	-4.82214
-1.10723	-11.7183	-6.41082
-1.54182	-4.25292	0.38413
-1.9966	-1.0739	0.906169
-1.93282	-0.474987	0.200495
-2.24481	-1.60217	0.424747
-0.710927	-4.91521	0.0909497
-0.848058	-4.5403	0.54357
-6.95392	-3.80908	0.0302594
-0.717565	-4.65899	-2.64969
-0.658523	-4.96563	-0.53613
-1.42405	-6.33104	0.0618128
-1.35136	-2.2251	-0.457359
-0.27583	-0.444302	-0.00137075
-1.4671	-1.62427	0.178544
-4.95511	-0.305159	1.00134
-2.85312	-0.450458	-0.519495
-2.57701	-1.42547	0.0802834
-2.92465	-3.96842	0.585029
-1.78777	-0.693129	-0.194046
-0.640148	-2.30563	0.353059
-0.568364	-4.67952	0.0605952
-0.468526	-3.08342	-0.511589
-3.56966	-3.27754	-0.22391
-1.19498	-5.43899	-0.676894
-4.08164	-4.37367	-2.13713
-1.83198	-5.36506	-1.51809
-2.91088	-5.48247	-0.469803
-4.05991	-8.3358	0.137604
-4.36425	-4.0401	-0.259262
-3.58526	-6.70749	-1.31138
-3.77558	-1.92742	-1.56039
-4.01365	-13.7014	-0.462089
-3.07364	-17.8605	-9.82638
-0.026002	-14.3527	-12.6481
-5.67993	-2.58872	-9.92163
-6.41706	-3.75606	-8.21015
-6.09443	0.241206	-7.93483
-8.24855	-0.825941	-7.67727
-5.46341	-1.21912	-10.2116
-5.78858	1.90463	-12.0627
-3.93675	2.91939	-13.1086
-8.87437	-6.95211	-9.68727
-3.7134	1.6245	-8.98434
-1.98009	0.886471	-8.46796
-0.953686	0.379066	-11.1648
-0.823985	-0.451541	-10.7076
-2.15291	1.30665	-0.0758131
-0.955968	0.089999	0.0102135
0.289787	0.174904	0.70557
-4.14189	0.288798	0.989287
-0.373221	0.33109	0.63988
-5.33435	-0.395428	-0.17633
-3.35252	-0.578792	-1.58884
0.456061	1.08914	0.961964
0.423561	1.30179	0.495619
1.68075	-1.77384	-0.830845
0.95598	-0.85892	-0.643887
0.253427	0.308804	0.888529
1.02165	-0.249587	1.77968
0.73397	-0.282183	-0.61617
0.920583	-0.556225	-0.415859
0.703273	-1.50412	-0.0118796
0.423351	-0.693167	0.227036
1.50362	2.21885	-0.622651
-0.117111	-1.17351	1.11008
0.247581	-0.911365	1.47554
0.816767	-0.644009	-0.115363
1.44583	-0.164069	-0.859071
1.15316	0.994761	0.573712
0.372606	0.436054	-0.0104461
1.49684	1.85134	-0.0435464
0.461352	-0.0692596	-0.247991
1.25699	1.78524	0.259382
0.759848	-1.25552	1.2361
-1.8383	-1.40258	0.0476573
0.71869	0.330536	0.375123
1.76356	1.02578	0.906725
1.62337	1.78461	0.781363
1.51179	-0.603434	0.0236744
0.395118	0.193512	-0.211302
0.762595	-0.367265	0.0206945
0.0331556	-1.5174	0.135192
5.20779	0.350874	-2.03166
5.74562	0.190238	0.718672
2.52498	0.395683	-0.722296
0.372731	0.614205	-0.50905
2.79617	-0.481519	-1.58856
-1.07407	0.181976	2.65572
-3.47129	0.329415	-0.863982
-9.27669	0.318106	-0.998108
-1.10019	-0.453262	0.289764
0.47771	0.99252	0.10406
-0.297059	0.384067	-0.255494
-0.538102	0.352718	2.10982
0.257571	0.0406362	-1.45284
-0.0708643	0.73977	0.884364
1.4103	0.0916431	0.371936
-0.572334	0.478121	-1.86279
-0.454716	0.373635	-1.69774
-0.827829	-0.652945	0.373933
-0.637646	1.01696	-2.53465
-0.532136	-0.181121	-0.261242
-0.00823193	1.74259	0.234122
-3.34543	0.92136	-0.316921
-1.72481	0.642134	0.926243
-1.19854	0.137355	-0.428744
-0.92595	0.0190563	-2.1375
-0.721905	0.154786	-0.732428
0.812291	-0.428693	2.41608
0.88967	-0.79507	0.13927
0.800137	0.621733	-0.634303
-1.13261	-0.39108	0.302595
0.0238392	-1.41394	-1.28382
-0.795878	-4.69627	-1.32848
-1.11161	0.52548	-1.54501
-0.216503	0.164143	-0.998304
1.34042	1.37975	-0.349358
2.43636	-0.418045	-0.518903
1.86981	0.376889	-1.14902
28.0328	2.6329	-0.61668
19.3615	0.193157	3.57865
20.9324	-1.47995	2.57148
20.2656	-0.152663	0.479368
17.1034	-0.735836	1.51244
18.7171	-0.0565428	0.967303
19.4533	-0.0268348	2.91475
20.5233	1.14524	3.2376
-0.417776	-0.145606	1.84504
-0.955371	-0.0197299	1.46391
-0.459839	1.01536	-0.22562
-0.494852	0.280455	1.24328
-0.861083	0.0523761	0.610021
-2.04182		1.83033
-4.20325		0.438417
-3.62081		0.189354
-0.0447851		-0.563277
2.0706		0.506562
2.08718		-0.127023
2.19103		0.293685
1.5239		-0.834105
1.92734		-0.291638
1.52472		0.500412
0.347904		-5.49435
0.941554		0.126405
1.29439		-21.3661
-0.133336		-22.3059
2.31559		-19.6551
1.10101		-22.3439
0.670656		-22.2598
0.296509		-21.5558
2.3341		-22.017
1.19026		-15.1398
1.34297		-13.0184
0.602373		-4.83688
1.50309		-23.313
1.90402		-18.917
0.776032		-12.2455
1.14435		-6.4348
2.053		-22.9659
1.45814		-8.43395
0.593265		-9.13888
1.31077		-8.49431
0.541974		-7.97914
1.83838		-5.81797
2.26654		-7.81475
1.80498		-12.1002
2.78074		-7.73814
3.48468		-5.79886
1.51086		-8.7199
2.89414		-14.5452
1.86947		-12.1531
2.17185		-14.9042
2.17022		-12.216
0.667433		-15.9237
-1.72996		-15.9872
0.627249		-13.551
2.10786		-15.3706
0.980734		-13.5681
2.69279		-16.157
2.60091		-20.5886
0.932194		-20.991
1.6959		-16.7679
2.19886		-16.1961
2.52264		-9.79588
2.956		-17.7523
1.42249		-16.6153
1.81156		-18.2844
1.50391		-18.0581
0.603349		-18.4221
1.06596		-18.432
1.61075		-21.5264
-0.279963		-16.9927
1.23368		-18.7463
1.1812		-19.2848
1.15337		-19.0496
1.81965		-15.6485
1.35436		-18.7281
0.973574		-20.8266
2.50191		-17.8384
-0.538749		-16.2043
2.98238		-5.40348
1.80081		-6.31168
1.46345		-7.00377
-0.22282		-20.8772
-0.225583		-19.1081
1.73986		-18.2014
1.18591		-19.54
2.35953		-21.4179
2.43597		-5.38374
0.745112		-5.81084
-0.014249		-4.94331
1.34869		-16.3989
-1.08505		-14.2339
-0.600352		-17.3797
-0.409596		-18.1259
0.321385		-19.9759
-1.13899		-14.3776
0.626474		-15.5001
-0.717243		-16.4056
1.16137		-16.4762
2.18331		-19.8055
2.45438		-14.0341
1.86393		-18.6668
2.61831		-16.7377
2.09406		-15.8667
2.25692		-15.6163
-2.71798		-20.8064
2.31224		-20.9266
-6.07139		-16.4391
1.908		-19.1729
-23.4393		-17.2912
-28.0418		-18.0853
-21.2659		-9.66286
-27.9083		-22.0648
-27.6664		0.389125
-26.6268		-15.6732
-25.4371		15.0397
-19.1187		13.0339
-13.4898		11.588
-5.09459		15.7835
-28.3628		14.2292
-25.836		13.4039
-15.0323		13.6251
-9.39184		9.54229
-26.789		7.67747
-8.20401		2.07187
-9.03076		16.1992
-6.58974		12.6814
-9.12011		7.07823
-4.671		4.65066
-8.57575		16.4168
-23.5864		5.22474
-11.2359		5.19434
-6.66173		3.86528
-5.07841		5.41434
-17.1822		4.0887
-18.3014		6.14048
-18.8827		9.7012
-22.8207		6.36009
-20.5594		5.16737
-21.7004		2.39832
-12.2053		5.93756
-14.1788		4.71296
-13.3376		11.4402
-20.1798		11.6774
-34.4481		12.6236
-37.4492		17.6175
-22.8561		12.4379
-21.1683		11.4604
-23.9615		7.29598
-27.9303		7.3571
-27.9532		7.59636
-29.5048		14.178
-19.3124		19.0351
-23.8671		17.6685
-25.4998		17.1066
-26.3478		16.4723
-26.0358		20.3789
-25.3045		17.9794
-19.0974		16.5672
-22.4292		18.279
-23.1092		12.1069
-24.9887		12.0404
-22.5687		12.5724
-20.3987		11.471
-7.43486		13.6325
-6.91085		12.931
-10.2672		12.3637
-8.8117		11.9959
-25.5527		12.0373
-24.9491		10.3146
-21.4518		10.7463
-25.171		10.8924
-31.2946		10.9669
-5.08484		5.46503
-5.52007		4.92953
-5.52325		6.4501
-12.1301		7.24539
-17.395		16.0179
-18.7399		15.0332
-17.4967		16.062
-21.9586		14.9899
-17.8059		18.1845
-17.0163		2.31029
-8.23806		3.55038
-20.667		3.23133
-17.6759		11.5168
-7.27877		10.9838
-20.6229		7.5833
-7.07802		9.82683
-20.2993		15.8275
-15.8384		6.5353
-34.0399		10.9629
-34.326		3.94357
-23.3782		8.57808
-25.3056		7.20742
-24.3466		3.61351
-22.4128		9.23648
-14.3125		2.97957
-28.4992		9.37486
-2.89244		8.77093
-25.2919		21.8333
-4.10839		21.6892
-1.35184		15.5546
-1.21148		15.7859
-1.55971		15.5437
-2.83521		14.5649
-1.35155		4.72644
-1.38565		15.9036
-0.977335		0.0829332
-0.680828		15.6578
-2.20964		3.24534
-1.86992		-0.939543
-0.595668		-1.59483
-0.974333		1.96569
-1.52012		-0.397871
0.252698		1.4118
0.228351		-0.0881176
0.550811		0.250311
0.34849		-1.21042
0.425717		-0.995507
0.390922		1.36286
-3.84073		0.661412
-1.28306		0.132107
0.288704		-0.833969
-0.050547		0.779573
-0.679452		0.881541
-1.7284		0.487945
-0.583359		0.614867
-0.596745		-0.117792
1.40618		0.670069
0.0585373		-2.02587
1.19808		-0.216613
1.64949		0.0242613
-1.59719		-1.58587
-5.4649		1.98268
-7.97037		0.875146
-2.14508		1.43241
-2.37488		3.06376
-1.65948		4.90553
-2.23946		5.08773
-1.85217		0.754679
-1.83088		1.2065
-1.14861		1.17989
-9.23312		-0.0365227
-1.14864		-0.550189
-1.06618		-1.67641
-1.2805		0.948698
-1.5639		-2.73669
-0.915678		-1.06665
-4.34823		-0.70716
-7.3237		0.322499
-0.782206		-0.401288
-3.2238		-0.0743952
-1.26272		0.24708
-0.618795		-0.2134
-0.646689		-0.818338
-0.571406		-1.72434
0.173157		-1.15249
-2.59779		-2.56015
-2.16916		-1.46716
-0.770925		-0.176144
-0.836716		0.281215
-4.62203		-1.94825
1.69447		-2.44747
1.49224		0.571703
2.37781		0.905471
-6.69782		-0.424258
-3.67294		-0.445956
-3.67024		-0.25908
-1.91402		-0.308558
-2.35455		-0.543354
-6.67026		-1.08239
-2.83695		-1.27391
-0.580468		-0.081353
-7.91547		-0.262377
-6.47973		5.43776
2.1037		9.51022
-4.48191		5.6743
0.571554		21.8843
-3.33835		22.3572
-0.0591964		18.4726
-2.15132		20.2614
-1.5321		22.4075
-2.42659		20.392
-3.35265		25.3098
-1.7694		21.0501
-1.74994		21.0209
-5.23991		21.9052
-1.14184		19.42
-9.59719		18.7921
-0.72826		17.5566
-4.55332		24.4652
-5.51098		15.315
-3.79954		-0.602766
-5.17278		-0.249196
-4.63436		-1.42567
-5.24981		-1.6072
-4.63317		-1.16716
-4.01402		-1.73124
-3.9963		-2.22003
-1.02995		-1.48842
-6.38775		-0.918507
-4.66591		0.0371731
-3.47323		-2.07527
-3.15606		0.0543469
-3.87852		-2.31656
-1.96776		-2.46897
-2.21189		-1.71468
-1.727		-2.6857
-1.4494		-1.62586
-1.00568		-1.45903
-1.64819		-1.63817
-3.81503		-2.22111
-1.66515		-2.77342
-1.60999		-1.64119
-1.9405		-1.20213
-0.845307		-2.25079
-1.74818		-3.0419
-3.14109		-0.588759
-3.10159		-0.745311
-2.73742		-0.884317
-2.88986		-1.40202
-4.31762		-2.53979
-4.72278		-0.752153
-1.77894		-1.7898
-2.87917		-0.781579
-1.94559		-1.14916
-2.83944		-0.805044
-7.82066		-0.310045
-8.80383		-0.346025
-3.30129		-1.94384
-2.70829		-1.52791
-3.5325		-1.21231
-3.48589		-3.12415
-3.23133		-2.03853
-2.95936		-0.714992
-5.64742		-1.52538
-2.59167		-0.524121
-2.58278		-1.02065
-3.20845		-3.35802
-3.12849		-3.92993
-2.52738		-5.99635
-2.07483		-1.71055
-3.52597		-3.18572
-3.72335		-2.71334
-3.45034		-1.62533
-3.98617		-2.30853
-4.79517		-3.02831
-2.45735		-1.88731
-1.33134		-2.24888
-1.44968		-1.16541
-1.40783		-1.31531
-1.11825		-1.70847
-2.9623		-1.19478
-3.22088		-1.19977
-2.29067		-3.14463
-4.36796		-1.97362
-4.83061		-1.64979
-5.6615		-1.90657
-5.83625		-0.881183
-5.28762		-1.57151
-16.1292		-0.868298
-18.5721		-1.74609
-15.8916		-1.40223
-16.7876		-1.1294
-13.8443		-2.89824
-18.8615		-2.7988
-15.8207		-2.30334
-14.5415		-3.62808
-19.0648		-2.98655
-17.6599		-0.149905
-15.6764		0.0213372
-15.5344		-0.649551
-13.3758		-2.02239
-18.3482		-2.08197
-16.9158		-2.11741
-3.59877		-1.90347
-4.62042		-0.200142
-2.14421		-4.60702
-2.34652		-2.33937
-2.66197		-1.17995
-0.67274		0.178004
-5.12		-0.814288
-3.05771		-1.08294
-6.62381		-3.0221
-3.2192		-1.92508
-0.13355		-1.88809
0.18861		-2.13463
-0.378287		-2.49571
-2.22696		-2.40311
-1.1527		-2.11153
-2.10215		-2.00545
-1.19221		-2.12822
0.135784		-2.64373
-0.674775		-1.97826
1.94515		-2.22809
-2.01964		3.15025
-3.22092		-2.17161
-1.62921		0.104741
-0.639338		0.145659
1.24315		0.149004
1.88899		0.00508976
1.62179		0.0795917
1.19489		-0.208192
1.84475		0.567383
0.864412		0.248285
1.18042		-0.230509
2.08782		0.348286
3.29438		0.120159
2.00894		-0.107127
2.16931		-0.298726
1.15526		0.0137058
1.84511		0.225983
1.90007		0.0138825
2.52745		0.0551616
5.31063		0.332813
1.3635		-0.0468946
-1.31918		0.0981306
2.40162		0.183945
1.18895		0.0886733
3.77002		-0.0599644
0.723319		-0.0236929
-5.34513		0.062951
-6.8738		-0.0779408
-0.890177		-0.265309
1.13872		-0.209044
-0.0969091		-0.183974
-0.994758		-0.197276
-0.410381		-0.900122
-0.514275		-0.325013
-1.69694		0.597014
1.97116		-0.049719
-0.831914		-0.309914
1.83419		-0.618081
-0.329657		0.24444
1.32981		-0.647843
0.925499		-0.528695
-3.44414		-0.0236931
-8.20385		0.478237
2.40918		-0.316277
-1.55045		0.0802191
0.355224		-0.0655753
1.38497		-0.456213
0.0434223		-0.402057
-0.0293178		-0.613492
0.436759		-1.48237
1.09233		-0.523614
-0.856681		-0.308778
0.041183		-0.469937
-0.246567		-0.0701384
-0.409105		-0.465146
-0.578211		-0.114437
3.24821		0.0531041
6.3574		-0.769542
6.00795		-0.201684
14.7722		-0.177819
15.3474		-0.114214
10.4952		-0.51591
8.85197		-0.0592037
8.53858		-0.193996
11.2536		-0.393308
5.22414		0.0990426
2.4881		-0.231612
6.13689		-0.343206
3.92068		-0.370713
3.99348		-0.264708
6.4806		0.164424
7.35892		0.0135532
4.03906		-0.158863
-0.357807		-1.00364
-0.257693		-0.329511
-0.164344		-1.05289
-0.291151		-1.35296
0.140727		0.132451
1.56752		-1.868
0.300459		-0.487661
-0.806981		0.194676
-11.9784		-1.32976
0.780794		-0.233928
-4.68811		-0.262176
-1.5425		-0.161157
-1.12651		1.73702
-3.85093		-0.375478
-3.61341		-0.777997
-2.95257		-0.033798
-2.17271		-0.653727
-1.55079		-0.0273402
-1.78442		-0.289353
-2.17958		-0.275763
-4.3126		-0.263146
-2.94331		-0.574449
-2.03488		0.0445425
-2.79099		0.552189
-1.48602		-0.354778
-1.68559		-0.907624
-1.15925		-0.87066
-1.21108		-0.83782
-1.0872		-1.39996
-1.03907		-0.576031
-6.72862		-0.398142
-2.52848		-0.587202
-1.61485		0.0450038
-1.94269		-0.541664
-4.38925		-0.707079
-5.55104		-0.89875
-5.60551		-0.111578
-3.6571		-0.373711
-3.87334		-0.305023
-6.73926		-0.361773
-3.36689		0.475008
-1.86051		0.290771
-2.83717		-0.513337
-6.73832		-0.380041
-10.5598		-0.369933
-3.23801		-0.19342
-1.18576		0.06234
-2.19544		-1.02302
-3.00646		-0.292435
-2.59242		-0.151335
-2.95824		-0.601681
-2.30242		-0.875126
-12.8046		-0.85611
-1.98116		-1.04145
-3.36233		1.20296
-1.84654		-1.59907
-2.84448		-0.426681
-2.03647		-1.28059
-6.30891		-0.118308
-6.54346		0.700387
-3.86486		-0.921639
-4.06049		-2.26356
-4.70234		-0.268755
-2.67814		0.233799
-1.01033		0.0538412
-1.32357		-0.727682
-0.473078		-0.546998
-1.33359		-0.152787
-4.3265		0.0357886
-4.73192		-3.11251
-5.21618		-0.844017
-3.50101		-0.00877401
-5.52153		-0.495211
-7.78843		-0.46208
-6.71244		0.0288361
-6.23974		-0.780274
-10.7027		0.7662
-11.0322		-0.0562727
-8.75989		-0.358622
-9.14924		-0.49199
-10.0972		1.21782
-9.04832		-0.733868
-9.02545		-0.0677891
-14.0141		-0.572266
-12.7481		-0.476366
-13.9956		-0.130533
-8.04359		-1.47437
-12.6956		-1.18135
-8.58196		-0.333853
-13.6941		-1.44847
-5.99061		-0.380615
-3.28186		0.825911
-4.40825		-0.188364
-3.96907		1.00648
-3.50797		-1.16949
-3.72147		-1.45592
-2.77647		-1.9848
-5.33944		-0.22155
-2.85278		0.353158
-12.2253		-1.27083
-3.92573		-0.861223
-5.70051		0.284655
-1.45787		-0.962549
0.355661		-0.505186
-4.38555		0.809125
-2.46229		0.847395
-3.34644		2.35606
-3.57425		0.194103
-1.11696		-1.51669
0.315595		-0.108908
-3.11385		0.12854
-2.73075		-0.0602961
-1.57152		0.0996424
-2.15692		-0.380374
-1.11088		-0.15264
-1.09112		0.0528813
-1.14489		0.386426
-1.75124		-2.53085
-2.09123		-0.601554
-2.544		3.84516
-2.94157		-1.56851
-2.62078		3.57491
-1.45542		3.52844
-5.21991		0.72313
-5.94534		3.33351
-6.90026		1.15171
-3.15034		0.920387
-2.99556		2.23616
-6.45719		1.64874
-3.24109		2.60782
-2.40695		-0.125085
-3.41365		0.900455
-6.13711		0.855628
-8.62471		1.91995
-4.25757		-0.266108
-0.56739		0.00365988
-1.27963		1.24423
-2.99569		0.145021
-1.29314		1.28632
-2.16682		0.839478
-1.60681		-1.25759
-14.143		-0.81948
-1.70072		0.43109
-3.14934		0.563844
-2.17028		0.0566735
-2.15655		-0.691026
-2.84908		0.00249152
-7.46844		-0.465556
-3.00572		-0.201878
-2.84364		-0.141608
-3.94603		4.13961
-3.75598		2.55681
-0.139355		1.27529
-1.91538		1.97873
-0.740309		-0.721196
-4.46853		0.68789
-5.43419		0.426085
-4.03688		0.373763
-3.02882		0.957698
-7.36901		3.46959
-4.234		3.04578
-5.39483		1.67557
-2.93322		1.62952
-7.71537		1.71553
-10.3212		2.00301
-6.95992		-2.42994
-4.86481		0.0785008
-10.5242		0.440211
-9.18232		-1.54895
-5.41105		-0.0802071
-10.6082		-0.420793
-5.7156		-0.381572
-8.45116		0.0913136
-10.7881		-1.83942
-5.6569		-0.52569
-2.25176		2.05916
-4.34689		-1.63851
-3.71934		-1.07619
-2.95947		1.6451
-3.07513		0.711124
-1.97494		0.578624
-4.24024		0.479276
-1.91422		-0.601795
-10.4841		-0.0224552
-4.21619		0.457819
-9.63843		1.55081
-12.7217		-0.0849619
-12.536		-1.63527
-12.2614		-1.91934
-8.59486		-0.558931
-11.8718		11.4021
-11.7089		9.62027
-8.91724		9.56076
-8.79159		2.67235
-5.1649		1.37603
-11.298		11.4226
-12.6422		9.39516
-8.73201		3.53894
-4.20532		2.49043
-7.93282		-0.11413
-3.69118		5.77901
-3.00048		3.08521
-1.63955		8.47725
-1.89653		4.03731
-0.883033		10.6454
-3.03751		0.681001
-10.5057		0.602229
-2.17855		-0.0495211
-1.28898		0.0382217
-3.50808		0.503797
-2.68822		0.0100671
-6.32765		3.63064
-6.34348		0.0365381
-6.97459		-0.313665
-1.32983		0.692334
-7.13813		1.27012
-4.26936		-0.717078
-7.02097		-1.24046
-4.19865		-0.293292
-13.4454		1.0931
-15.6452		-0.274448
-6.72085		0.63878
-9.47984		0.0978749
-5.80654		-1.44832
-6.03029		-0.782879
-4.30481		-0.3699
-5.91177		1.5906
-5.26989		-0.647079
-8.06691		-2.45298
-6.29814		-1.44468
-9.57288		0.0360082
-9.84918		0.845762
-11.5502		0.026722
-12.2304		-0.90912
-7.78453		-0.0677869
-12.4565		0.551924
-9.35221		-1.30301
-9.57076		-0.295733
-6.99377		-0.646618
-9.55636		-0.196624
-2.23981		0.720667
-1.72176		0.51227
-2.48118		0.524822
-2.96113		-0.423058
-6.83933		1.55621
-7.02572		-0.186545
-6.48703		-1.14067
-10.6737		-1.92379
-11.3933		1.81219
-2.5126		-1.64913
-5.4604		-2.81484
-0.729968		2.61438
-4.50984		1.30981
-5.32087		2.57861
-5.50031		4.69564
-6.78253		0.336644
-2.27598		2.45896
-9.45091		2.32812
-3.35348		0.267701
-11.1403		1.6425
-9.32152		-1.55273
-7.56986		0.860202
-10.9537		1.06597
-7.95261		1.6369
-5.67404		0.650222
-12.3257		2.00816
-11.5042		0.0978388
-7.45275		-1.01228
-8.00774		1.34094
-8.14499		-0.361562
-7.02775		0.406559
-5.45098		1.09384
-8.89106		-0.444539
-2.87813		0.1941
-7.04852		1.77074
-19.4489		1.33801
-20.3967		1.07916
-17.5306		-0.695412
-17.6288		1.02585
-20.6536		0.521675
-20.195		-0.621083
-19.4725		0.455138
-13.7319		-3.78054
-12.9937		-4.65691
-5.322		-4.57211
-19.1906		-5.0434
-15.6181		-4.56846
-10.2304		-2.10579
-4.80775		-5.48849
-18.7185		-3.3749
-6.03847		2.60827
-5.96112		-1.51598
-5.83978		-2.79387
-6.58544		-2.68536
-4.0764		-1.84902
-7.4749		0.75098
-18.7375		4.81504
-8.32804		1.92352
-5.29427		1.99522
-4.22141		1.14753
-10.1667		0.703756
-11.323		-1.37664
-10.6574		-2.07129
-6.54143		1.3008
-5.66501		1.38177
-12.2642
-9.23764
-11.6312
-5.64447
-23.5127
-22.6716
-13.0815
-16.1574
-16.0327
-16.7382
-14.126
-12.2234
-15.8181
-13.4297
-15.0112
-17.3367
-17.1138
-20.3375
-20.711
-18.3482
-19.9098
-19.5025
-22.4696
-18.0401
-16.0482
-5.10353
-3.26274
-5.83534
-5.07447
-14.1659
-14.6792
-11.842
-16.2866
-20.8382
-7.22838
-9.36723
-8.40894
-17.8432
-14.3245
-16.2352
-14.8697
-14.0271
-13.3502
-15.7432
-15.6933
-19.8472
-18.1462
-12.5821
-23.6593
-14.5613
-21.8804
-18.5132
-15.7738
-18.8474
-14.8145
-15.8761
-8.90409
-19.9524
-8.96367
-15.985
-12.4098
-12.3212
-10.1637
-12.5473
-12.1894
-13.6753
-13.8026
-13.5665
-15.4067
-12.4081
-11.1836
-14.4793
-14.3271
-9.36952
-14.0155
-4.72556
-2.58881
-2.6712
-2.11999
-4.97563
-4.55092
-22.9891
-3.52207
-3.56123
-6.42376
-3.74904
-4.57907
-9.86717
-9.7285
-9.19013
-4.25885
-5.74045
-10.2756
-3.21493
-4.35783
-1.71655
-19.2245
-21.097
-10.8528
-12.4345
-9.90668
-7.78048
-8.56426
-6.71965
-9.53141
-6.90911
-1.62889
-1.03761
-1.72711
-3.01186
-3.59672
-6.49748
-12.4481
-14.8616
-14.1883
-14.406
-12.6258
-1.59397
-1.85197
-4.71746
-9.29078
-12.2273
-14.3144
-11.1927
-11.9895
-7.78095
-8.01474
-10.4984
-7.99129
-5.21829
-7.74625
-4.63656
-2.98456
-13.0608
-7.11911
-10.0017
-6.82571
-13.0097
-12.1547
-11.3376
-14.7957
-12.6587
-13.066
-16.1939
-14.9992
-13.866
-15.1802
-16.1818
-14.8674
-15.6422
-9.94763
-6.14287
-6.09157
-6.23924
-5.18658
-3.97737
-6.48468
-17.9577
-4.85631
-4.09577
-7.1644
-7.26111
-5.4866
-9.60584
-10.4304
-9.4035
-3.14056
-10.5242
-11.7278
-6.48724
-6.36721
-2.75309
-16.8841
-18.8145
-10.6659
-12.9963
-9.05316
-10.7336
-12.5123
-9.70389
-11.8613
-9.24169
-2.55393
-0.845536
-2.46804
-3.7167
-2.92944
-8.78579
-12.0611
-11.957
-13.289
-14.9802
-11.7359
-5.00886
-4.33449
-5.43988
-11.6678
-10.3888
-12.2408
-11.0158
-11.7093
-9.89847
-9.15051
-10.9118
-9.98987
-9.67892
-5.75849
-6.22653
-5.5193
-18.3566
-7.74439
-10.6565
-6.91793
-4.57668
-5.41863
-4.97458
-6.62568
-4.75141
-4.42903
-3.90037
-3.64214
-3.88871
-4.54397
-4.97338
-5.04964
-2.81193
-2.45459
-1.94522
-1.40804
-1.83354
-1.77746
-1.54787
-1.51315
-10.6978
-2.26681
-1.07559
-1.94626
-5.27607
-6.14778
-5.06939
-3.26954
-3.19797
-6.35692
-1.85428
-2.3792
-1.29908
-9.11871
-10.9684
-3.24173
-3.93993
-4.79735
-2.56831
-5.19428
-3.97224
-4.27431
-8.06959
-0.772979
-1.99687
-2.10163
-2.72868
-1.52806
-3.45406
-2.68868
-4.759
-5.6399
-4.68332
-3.56042
-1.52568
-1.57574
-1.03039
-5.4098
-4.52565
-4.10104
-3.58827
-4.79839
-7.11061
-6.32769
-6.01895
-1.70533
-3.65804
-4.75622
-2.74769
-2.71069
-1.5556
-3.25611
-7.52395
-8.4893
-9.43649
-5.64655
-10.2567
-0.696134
-8.02736
-5.37207
-2.5613
-2.5107
-3.87694
-3.8248
-3.5741
-1.21841
-16.4582
-7.20639
-3.10633
