# Supplementary material for: A robust method for measuring aminoacylation through tRNA-Seq
Source: eLife. 2024 Jul 30;12:RP91554. doi: 10.7554/eLife.91554 (PMC11288633; doi:10.7554/eLife.91554)
Supplement: Figure 2—figure supplement 6—source data 1. [file elife-91554-fig2-figsupp6-data1.xlsx]

## Sheet: Fig2S6C
polymerase	AA_letter	p_full	Compartment
Maxima	A	25.7358	Cyto
Maxima	C	8.16005	Cyto
Maxima	D	18.3741	Cyto
Maxima	E	39.855	Cyto
Maxima	F	6.42475	Cyto
Maxima	G	45.146	Cyto
Maxima	H	35.2743	Cyto
Maxima	I	11.1406	Cyto
Maxima	K	13.3364	Cyto
Maxima	L	23.2465	Cyto
Maxima	M	35.8882	Cyto
Maxima	N	13.3835	Cyto
Maxima	P	2.74648	Cyto
Maxima	Q	33.1851	Cyto
Maxima	R	21.402	Cyto
Maxima	S	6.56193	Cyto
Maxima	T	8.64712	Cyto
Maxima	V	40.0638	Cyto
Maxima	W	5.02096	Cyto
Maxima	Y	0.917701	Cyto
TGIRT	A	30.7607	Cyto
TGIRT	C	40.7584	Cyto
TGIRT	D	37.967	Cyto
TGIRT	E	46.8896	Cyto
TGIRT	F	15.6934	Cyto
TGIRT	G	48.8465	Cyto
TGIRT	H	40.9692	Cyto
TGIRT	I	26.0822	Cyto
TGIRT	K	17.5083	Cyto
TGIRT	L	23.7894	Cyto
TGIRT	M	38.6849	Cyto
TGIRT	N	17.4262	Cyto
TGIRT	P	39.8154	Cyto
TGIRT	Q	35.3684	Cyto
TGIRT	R	26.7052	Cyto
TGIRT	S	26.9908	Cyto
TGIRT	T	19.3069	Cyto
TGIRT	V	42.6028	Cyto
TGIRT	W	14.041	Cyto
TGIRT	Y	0.704764	Cyto
Maxima	A	27.2817	Cyto
Maxima	C	7.96819	Cyto
Maxima	D	27.2633	Cyto
Maxima	E	42.0441	Cyto
Maxima	F	6.85099	Cyto
Maxima	G	45.8554	Cyto
Maxima	H	30.2802	Cyto
Maxima	I	12.1635	Cyto
Maxima	K	15.5384	Cyto
Maxima	L	22.5669	Cyto
Maxima	M	36.0257	Cyto
Maxima	N	11.7481	Cyto
Maxima	P	3.08217	Cyto
Maxima	Q	33.3629	Cyto
Maxima	R	21.8708	Cyto
Maxima	S	6.58882	Cyto
Maxima	T	10.6163	Cyto
Maxima	V	39.2788	Cyto
Maxima	W	6.27069	Cyto
Maxima	Y	0.829509	Cyto
TGIRT	A	32.1994	Cyto
TGIRT	C	42.4894	Cyto
TGIRT	D	40.1285	Cyto
TGIRT	E	49.7541	Cyto
TGIRT	F	15.015	Cyto
TGIRT	G	50.6864	Cyto
TGIRT	H	34.8333	Cyto
TGIRT	I	25.3584	Cyto
TGIRT	K	20.4944	Cyto
TGIRT	L	23.2875	Cyto
TGIRT	M	39.941	Cyto
TGIRT	N	14.6998	Cyto
TGIRT	P	38.6983	Cyto
TGIRT	Q	36.5901	Cyto
TGIRT	R	28.3067	Cyto
TGIRT	S	24.3702	Cyto
TGIRT	T	21.6459	Cyto
TGIRT	V	43.0854	Cyto
TGIRT	W	21.1796	Cyto
TGIRT	Y	0.613612	Cyto
Maxima	A	26.0494	Cyto
Maxima	C	8.59305	Cyto
Maxima	D	18.647	Cyto
Maxima	E	40.0819	Cyto
Maxima	F	5.15347	Cyto
Maxima	G	44.9237	Cyto
Maxima	H	36.7236	Cyto
Maxima	I	11.3734	Cyto
Maxima	K	14.9092	Cyto
Maxima	L	22.2819	Cyto
Maxima	M	36.6716	Cyto
Maxima	N	12.4	Cyto
Maxima	P	2.66286	Cyto
Maxima	Q	34.0916	Cyto
Maxima	R	21.3292	Cyto
Maxima	S	6.74877	Cyto
Maxima	T	8.87613	Cyto
Maxima	V	40.4633	Cyto
Maxima	W	4.85251	Cyto
Maxima	Y	0.850474	Cyto
TGIRT	A	31.3555	Cyto
TGIRT	C	42.5775	Cyto
TGIRT	D	37.9061	Cyto
TGIRT	E	47.7317	Cyto
TGIRT	F	13.7044	Cyto
TGIRT	G	48.4894	Cyto
TGIRT	H	43.8403	Cyto
TGIRT	I	25.9102	Cyto
TGIRT	K	20.3085	Cyto
TGIRT	L	23.3361	Cyto
TGIRT	M	39.1448	Cyto
TGIRT	N	16.8601	Cyto
TGIRT	P	38.3537	Cyto
TGIRT	Q	35.158	Cyto
TGIRT	R	26.545	Cyto
TGIRT	S	27.2544	Cyto
TGIRT	T	18.7317	Cyto
TGIRT	V	43.2655	Cyto
TGIRT	W	12.7591	Cyto
TGIRT	Y	0.60616	Cyto
Maxima	A	28.5965	Cyto
Maxima	C	9.22404	Cyto
Maxima	D	25.6785	Cyto
Maxima	E	41.4811	Cyto
Maxima	F	6.79166	Cyto
Maxima	G	45.3535	Cyto
Maxima	H	28.9469	Cyto
Maxima	I	12.3575	Cyto
Maxima	K	14.8051	Cyto
Maxima	L	22.1333	Cyto
Maxima	M	35.3248	Cyto
Maxima	N	12.2049	Cyto
Maxima	P	3.09088	Cyto
Maxima	Q	32.5685	Cyto
Maxima	R	21.4516	Cyto
Maxima	S	6.50257	Cyto
Maxima	T	9.95128	Cyto
Maxima	V	37.3078	Cyto
Maxima	W	6.36537	Cyto
Maxima	Y	0.809584	Cyto
TGIRT	A	31.6329	Cyto
TGIRT	C	42.7384	Cyto
TGIRT	D	37.8984	Cyto
TGIRT	E	48.1576	Cyto
TGIRT	F	14.5602	Cyto
TGIRT	G	49.6961	Cyto
TGIRT	H	30.6936	Cyto
TGIRT	I	23.6241	Cyto
TGIRT	K	19.2761	Cyto
TGIRT	L	22.5857	Cyto
TGIRT	M	38.6798	Cyto
TGIRT	N	14.4599	Cyto
TGIRT	P	38.6245	Cyto
TGIRT	Q	34.5706	Cyto
TGIRT	R	26.7775	Cyto
TGIRT	S	24.877	Cyto
TGIRT	T	19.9971	Cyto
TGIRT	V	39.6861	Cyto
TGIRT	W	19.595	Cyto
TGIRT	Y	0.693465	Cyto
Maxima	A	26.0109	Cyto
Maxima	C	8.91321	Cyto
Maxima	D	19.0379	Cyto
Maxima	E	40.3174	Cyto
Maxima	F	6.44732	Cyto
Maxima	G	44.9401	Cyto
Maxima	H	33.5103	Cyto
Maxima	I	11.5996	Cyto
Maxima	K	15.6261	Cyto
Maxima	L	22.8037	Cyto
Maxima	M	35.7231	Cyto
Maxima	N	12.2218	Cyto
Maxima	P	2.72592	Cyto
Maxima	Q	32.6645	Cyto
Maxima	R	20.407	Cyto
Maxima	S	5.95436	Cyto
Maxima	T	8.76555	Cyto
Maxima	V	39.191	Cyto
Maxima	W	4.71811	Cyto
Maxima	Y	1.08694	Cyto
TGIRT	A	31.1563	Cyto
TGIRT	C	42.0073	Cyto
TGIRT	D	38.0936	Cyto
TGIRT	E	48.0717	Cyto
TGIRT	F	15.7553	Cyto
TGIRT	G	48.5859	Cyto
TGIRT	H	38.882	Cyto
TGIRT	I	25.2352	Cyto
TGIRT	K	19.5677	Cyto
TGIRT	L	22.8538	Cyto
TGIRT	M	39.0048	Cyto
TGIRT	N	16.0182	Cyto
TGIRT	P	38.5074	Cyto
TGIRT	Q	34.9775	Cyto
TGIRT	R	25.0335	Cyto
TGIRT	S	24.6302	Cyto
TGIRT	T	18.8272	Cyto
TGIRT	V	42.3297	Cyto
TGIRT	W	13.4692	Cyto
TGIRT	Y	0.719424	Cyto
Maxima	A	28.0489	Cyto
Maxima	C	8.79782	Cyto
Maxima	D	26.7221	Cyto
Maxima	E	41.8164	Cyto
Maxima	F	7.20054	Cyto
Maxima	G	45.6182	Cyto
Maxima	H	31.2523	Cyto
Maxima	I	11.7875	Cyto
Maxima	K	15.2632	Cyto
Maxima	L	20.5531	Cyto
Maxima	M	35.0805	Cyto
Maxima	N	11.5592	Cyto
Maxima	P	3.16918	Cyto
Maxima	Q	33.1701	Cyto
Maxima	R	21.9876	Cyto
Maxima	S	6.7345	Cyto
Maxima	T	9.61853	Cyto
Maxima	V	38.467	Cyto
Maxima	W	6.21651	Cyto
Maxima	Y	0.872024	Cyto
TGIRT	A	31.9458	Cyto
TGIRT	C	43.9833	Cyto
TGIRT	D	39.293	Cyto
TGIRT	E	49.5178	Cyto
TGIRT	F	15.2654	Cyto
TGIRT	G	49.5016	Cyto
TGIRT	H	34.4389	Cyto
TGIRT	I	25.6972	Cyto
TGIRT	K	20.381	Cyto
TGIRT	L	21.7421	Cyto
TGIRT	M	39.2058	Cyto
TGIRT	N	14.6701	Cyto
TGIRT	P	38.246	Cyto
TGIRT	Q	36.3458	Cyto
TGIRT	R	27.7841	Cyto
TGIRT	S	25.8222	Cyto
TGIRT	T	20.5864	Cyto
TGIRT	V	41.6598	Cyto
TGIRT	W	20.4173	Cyto
TGIRT	Y	0.605335	Cyto
Maxima	A	24.9134	Cyto
Maxima	C	8.75428	Cyto
Maxima	D	16.7756	Cyto
Maxima	E	38.2928	Cyto
Maxima	F	9.29111	Cyto
Maxima	G	44.658	Cyto
Maxima	H	32.0799	Cyto
Maxima	I	11.264	Cyto
Maxima	K	15.8844	Cyto
Maxima	L	21.4756	Cyto
Maxima	M	35.2235	Cyto
Maxima	N	13.1882	Cyto
Maxima	P	2.58907	Cyto
Maxima	Q	32.2809	Cyto
Maxima	R	20.0035	Cyto
Maxima	S	6.22301	Cyto
Maxima	T	8.35614	Cyto
Maxima	V	36.6797	Cyto
Maxima	W	4.8345	Cyto
Maxima	Y	0.942483	Cyto
TGIRT	A	29.8106	Cyto
TGIRT	C	42.0708	Cyto
TGIRT	D	35.3091	Cyto
TGIRT	E	46.1204	Cyto
TGIRT	F	17.4665	Cyto
TGIRT	G	49.1084	Cyto
TGIRT	H	38.3432	Cyto
TGIRT	I	23.1501	Cyto
TGIRT	K	18.7491	Cyto
TGIRT	L	22.2642	Cyto
TGIRT	M	38.0715	Cyto
TGIRT	N	15.6064	Cyto
TGIRT	P	37.4156	Cyto
TGIRT	Q	35.983	Cyto
TGIRT	R	24.1903	Cyto
TGIRT	S	24.2134	Cyto
TGIRT	T	17.5902	Cyto
TGIRT	V	37.6621	Cyto
TGIRT	W	12.665	Cyto
TGIRT	Y	0.503973	Cyto
Maxima	A	32.3442	Mito
Maxima	C	50.7538	Mito
Maxima	D	49.6211	Mito
Maxima	E	45.4836	Mito
Maxima	F	19.0262	Mito
Maxima	G	52.4417	Mito
Maxima	H	42.1596	Mito
Maxima	I	49.3466	Mito
Maxima	K	40.0658	Mito
Maxima	L	39.9523	Mito
Maxima	M	55.0399	Mito
Maxima	N	48.0242	Mito
Maxima	P	56.0211	Mito
Maxima	Q	11.4277	Mito
Maxima	R	46.5703	Mito
Maxima	S	7.1851	Mito
Maxima	T	49.7645	Mito
Maxima	V	44.2334	Mito
Maxima	W	14.6423	Mito
Maxima	Y	8.72253	Mito
TGIRT	A	24.4219	Mito
TGIRT	C	51.2505	Mito
TGIRT	D	37.6611	Mito
TGIRT	E	31.1908	Mito
TGIRT	F	14.0339	Mito
TGIRT	G	40.3938	Mito
TGIRT	H	37.6929	Mito
TGIRT	I	45.1637	Mito
TGIRT	K	24.3302	Mito
TGIRT	L	40.7491	Mito
TGIRT	M	52.2951	Mito
TGIRT	N	40.9276	Mito
TGIRT	P	49.6542	Mito
TGIRT	Q	13.1942	Mito
TGIRT	R	43.3668	Mito
TGIRT	S	7.31161	Mito
TGIRT	T	51.1331	Mito
TGIRT	V	46.4111	Mito
TGIRT	W	10.5822	Mito
TGIRT	Y	5.84567	Mito
Maxima	A	31.699	Mito
Maxima	C	52.7132	Mito
Maxima	D	50.7921	Mito
Maxima	E	48.6814	Mito
Maxima	F	20.5292	Mito
Maxima	G	53.7375	Mito
Maxima	H	39.0612	Mito
Maxima	I	50.5455	Mito
Maxima	K	38.6402	Mito
Maxima	L	43.0661	Mito
Maxima	M	53.7701	Mito
Maxima	N	46.896	Mito
Maxima	P	57.4414	Mito
Maxima	Q	11.6156	Mito
Maxima	R	47.0838	Mito
Maxima	S	7.63626	Mito
Maxima	T	49.7856	Mito
Maxima	V	43.736	Mito
Maxima	W	15.0898	Mito
Maxima	Y	13.9871	Mito
TGIRT	A	26.776	Mito
TGIRT	C	55.6622	Mito
TGIRT	D	35.3559	Mito
TGIRT	E	33.1037	Mito
TGIRT	F	15.9363	Mito
TGIRT	G	41.1787	Mito
TGIRT	H	34.669	Mito
TGIRT	I	44.2916	Mito
TGIRT	K	26.456	Mito
TGIRT	L	39.335	Mito
TGIRT	M	54.0304	Mito
TGIRT	N	40.0887	Mito
TGIRT	P	52.5173	Mito
TGIRT	Q	15.7154	Mito
TGIRT	R	46.5263	Mito
TGIRT	S	9.93976	Mito
TGIRT	T	50.9646	Mito
TGIRT	V	47.4479	Mito
TGIRT	W	12.1889	Mito
TGIRT	Y	7.84913	Mito
Maxima	A	32.1077	Mito
Maxima	C	54.432	Mito
Maxima	D	51.0271	Mito
Maxima	E	47.8435	Mito
Maxima	F	20.9502	Mito
Maxima	G	54.5287	Mito
Maxima	H	41.2039	Mito
Maxima	I	50.1311	Mito
Maxima	K	39.5577	Mito
Maxima	L	40.6604	Mito
Maxima	M	54.1002	Mito
Maxima	N	50.8582	Mito
Maxima	P	55.5367	Mito
Maxima	Q	12.3849	Mito
Maxima	R	45.6567	Mito
Maxima	S	9.71297	Mito
Maxima	T	51.1314	Mito
Maxima	V	44.8103	Mito
Maxima	W	13.9268	Mito
Maxima	Y	12.2793	Mito
TGIRT	A	24.7407	Mito
TGIRT	C	55.8262	Mito
TGIRT	D	35.9506	Mito
TGIRT	E	31.5212	Mito
TGIRT	F	18.4823	Mito
TGIRT	G	42.9709	Mito
TGIRT	H	37.9951	Mito
TGIRT	I	43.0847	Mito
TGIRT	K	25.1761	Mito
TGIRT	L	39.9962	Mito
TGIRT	M	52.4258	Mito
TGIRT	N	41.4103	Mito
TGIRT	P	51.6837	Mito
TGIRT	Q	14.8269	Mito
TGIRT	R	42.1252	Mito
TGIRT	S	11.1013	Mito
TGIRT	T	49.3579	Mito
TGIRT	V	46.2333	Mito
TGIRT	W	14.9958	Mito
TGIRT	Y	7.31261	Mito
Maxima	A	32.5342	Mito
Maxima	C	51.546	Mito
Maxima	D	51.8135	Mito
Maxima	E	48.3589	Mito
Maxima	F	22.3256	Mito
Maxima	G	53.2914	Mito
Maxima	H	38.6805	Mito
Maxima	I	48.7196	Mito
Maxima	K	37.9233	Mito
Maxima	L	40.1139	Mito
Maxima	M	53.7963	Mito
Maxima	N	46.8034	Mito
Maxima	P	55.2209	Mito
Maxima	Q	11.7921	Mito
Maxima	R	47.8095	Mito
Maxima	S	6.85109	Mito
Maxima	T	46.9434	Mito
Maxima	V	41.5963	Mito
Maxima	W	13.4569	Mito
Maxima	Y	11.2119	Mito
TGIRT	A	24.929	Mito
TGIRT	C	52.9105	Mito
TGIRT	D	36.7103	Mito
TGIRT	E	32.8854	Mito
TGIRT	F	16.0664	Mito
TGIRT	G	41.7665	Mito
TGIRT	H	33.9329	Mito
TGIRT	I	46.6622	Mito
TGIRT	K	24.5283	Mito
TGIRT	L	37.7367	Mito
TGIRT	M	54.9642	Mito
TGIRT	N	40.1376	Mito
TGIRT	P	51.0401	Mito
TGIRT	Q	14.5	Mito
TGIRT	R	46.3832	Mito
TGIRT	S	8.3869	Mito
TGIRT	T	49.6798	Mito
TGIRT	V	45.668	Mito
TGIRT	W	10.8493	Mito
TGIRT	Y	7.6175	Mito
Maxima	A	31.5866	Mito
Maxima	C	54.7649	Mito
Maxima	D	49.0523	Mito
Maxima	E	45.4848	Mito
Maxima	F	19.8712	Mito
Maxima	G	52.4626	Mito
Maxima	H	40.0316	Mito
Maxima	I	48.6328	Mito
Maxima	K	37.9918	Mito
Maxima	L	40.3654	Mito
Maxima	M	50.6216	Mito
Maxima	N	49.5437	Mito
Maxima	P	56.5287	Mito
Maxima	Q	12.1492	Mito
Maxima	R	47.1675	Mito
Maxima	S	7.5543	Mito
Maxima	T	48.8	Mito
Maxima	V	45.0383	Mito
Maxima	W	14.1419	Mito
Maxima	Y	10.1996	Mito
TGIRT	A	24.4981	Mito
TGIRT	C	49.2215	Mito
TGIRT	D	33.6879	Mito
TGIRT	E	30.8217	Mito
TGIRT	F	17.5319	Mito
TGIRT	G	41.431	Mito
TGIRT	H	39.1919	Mito
TGIRT	I	43.983	Mito
TGIRT	K	25.9581	Mito
TGIRT	L	41.6248	Mito
TGIRT	M	54.1171	Mito
TGIRT	N	41.4425	Mito
TGIRT	P	49.8379	Mito
TGIRT	Q	14.826	Mito
TGIRT	R	41.7327	Mito
TGIRT	S	8.117	Mito
TGIRT	T	48.5272	Mito
TGIRT	V	46.567	Mito
TGIRT	W	12.07	Mito
TGIRT	Y	6.32571	Mito
Maxima	A	32.1191	Mito
Maxima	C	49.7171	Mito
Maxima	D	50.5899	Mito
Maxima	E	49.1795	Mito
Maxima	F	23.3677	Mito
Maxima	G	54.6781	Mito
Maxima	H	39.1385	Mito
Maxima	I	49.5184	Mito
Maxima	K	38.77	Mito
Maxima	L	40.6152	Mito
Maxima	M	54.2389	Mito
Maxima	N	46.0151	Mito
Maxima	P	56.0308	Mito
Maxima	Q	12.8247	Mito
Maxima	R	48.186	Mito
Maxima	S	8.14494	Mito
Maxima	T	50.2874	Mito
Maxima	V	44.3595	Mito
Maxima	W	13.8683	Mito
Maxima	Y	10.5455	Mito
TGIRT	A	24.7656	Mito
TGIRT	C	53.4015	Mito
TGIRT	D	35.4575	Mito
TGIRT	E	33.9408	Mito
TGIRT	F	16.5955	Mito
TGIRT	G	41.8953	Mito
TGIRT	H	32.5893	Mito
TGIRT	I	44.4005	Mito
TGIRT	K	26.7085	Mito
TGIRT	L	37.7097	Mito
TGIRT	M	53.6481	Mito
TGIRT	N	40.3042	Mito
TGIRT	P	51.7994	Mito
TGIRT	Q	18.75	Mito
TGIRT	R	46.4169	Mito
TGIRT	S	8.24411	Mito
TGIRT	T	47.4942	Mito
TGIRT	V	45.7499	Mito
TGIRT	W	11.7436	Mito
TGIRT	Y	8.27517	Mito
Maxima	A	31.5259	Mito
Maxima	C	49.8325	Mito
Maxima	D	49.6179	Mito
Maxima	E	47.8726	Mito
Maxima	F	24.9351	Mito
Maxima	G	52.7219	Mito
Maxima	H	41.6101	Mito
Maxima	I	50.9338	Mito
Maxima	K	37.4154	Mito
Maxima	L	38.1143	Mito
Maxima	M	52.246	Mito
Maxima	N	49.8074	Mito
Maxima	P	56.6046	Mito
Maxima	Q	9.91699	Mito
Maxima	R	46.181	Mito
Maxima	S	8.17772	Mito
Maxima	T	49.1373	Mito
Maxima	V	42.7047	Mito
Maxima	W	15.9	Mito
Maxima	Y	9.91561	Mito
TGIRT	A	23.704	Mito
TGIRT	C	49.712	Mito
TGIRT	D	34.1735	Mito
TGIRT	E	33.1445	Mito
TGIRT	F	23.8202	Mito
TGIRT	G	42.0403	Mito
TGIRT	H	40.149	Mito
TGIRT	I	44.3696	Mito
TGIRT	K	26.1518	Mito
TGIRT	L	37.7825	Mito
TGIRT	M	51.816	Mito
TGIRT	N	41.3253	Mito
TGIRT	P	50.6027	Mito
TGIRT	Q	14.5885	Mito
TGIRT	R	41.1348	Mito
TGIRT	S	9.91413	Mito
TGIRT	T	47.5472	Mito
TGIRT	V	46.7457	Mito
TGIRT	W	14.0887	Mito
TGIRT	Y	10.8387	Mito
