# Supplementary material for: A robust method for measuring aminoacylation through tRNA-Seq
Source: eLife. 2024 Jul 30;12:RP91554. doi: 10.7554/eLife.91554 (PMC11288633; doi:10.7554/eLife.91554)
Supplement: Figure 2—figure supplement 7—source data 1. [file elife-91554-fig2-figsupp7-data1.xlsx]

## Sheet: Fig2S7A
RPM_M	RPM_T
2676.17	3523.98
4212.82	4330.36
7218.63	10987.4
4191.3	6226.32
8114.6	9222.88
12512.3	13630.4
3651.37	3624.03
6709.02	8789.59
4583.54	4825.54
3555.52	4468.57
5274.1	3263.66
3031.24	4052.24
1614.9	1596.64
9304.99	11354.6
3122.2	4555.9
2905.06	3863.15
18770.4	20043.3
9435.08	9418.76
7387.84	8549.63
9826.33	10839
3860.69	4136.18
3417.6	3850.43
2743.67	3364.57
3632.79	3748.68
2638.03	2281.77
6741.3	7170.91
2859.09	2023.15
12259.9	8339.35
5473.64	3944.55
12770.5	13468.4
3775.6	3642.69
2425.77	2084.2
5590.03	5782.85
15779.3	13021.6
2452.18	1841.69
832.392	1665.33
6839.11	20204.4
3114.38	2271.59
1130.72	503.668
399.079	1304.96
3818.63	10302.3
4459.31	3328.11
241.599	1002.25
781.529	2492.9
239.643	1727.22
20295.3	27251.5
4814.37	5564.93
3044.93	3962.36
3192.63	2885.49
4139.46	2648.07
3848.96	5277.49
2460.98	2784.59
21554.2	22140.2
6118.23	5369.06
5325.94	6399.29
5152.81	6549.38
1637.4	1914.62
4261.73	4020.86
3964.38	4344.77
11762.1	11685.3
35014.3	37253.6
14176.1	14257
3605.4	2842.25
5823.81	6276.34
12607.2	13447.2
6123.12	6774.92
3125.14	3241.62
31143.8	31944.7
865.648	1053.12
833.37	1240.51
2728.02	1585.62
1239.3	8016.29
6754.01	7359.14
1172.78	5470.81
2844.41	2252.94
3402.93	2504.77
6642.51	5307.17
1930.84	1712.81
7599.12	8488.58
2226.23	2300.42
1864.32	1897.66
4314.55	4583.88
20018.5	17015.3
7536.52	7313.36
7805.51	5708.23
1680.43	1158.27
1736.19	1332.94
2101.03	2041.8
3418.58	3418.84
3717.89	3612.16
1813.46	1661.09
3516.39	2843.94
5521.57	6388.27
14539	15227
4460.29	3924.2
2156.79	1502.52
54070.3	38773.9
8091.12	5983.81
2697.69	2586.17
13256.6	11801.4
2045.28	1932.42
11230	9229.67
3780.49	5047.7
4708.74	7904.36
1305.81	1299.02
42151.7	27304
928.249	1562.73
4534.63	22196.1
10586.3	7371.02
4627.55	2852.42
1369.39	1334.63
5368.98	4291.35
988.893	1201.51
3447.92	3774.12
6683.59	4036.13
27037.6	4920.51
613.29	9825.76
2644.87	1788.27
3751.14	3207.7
5986.18	3210.25
2637.05	2031.63
5650.68	4309.16
22217.3	10683.9
3489.98	2381.82
14850	6125.41
6926.17	1799.3
110.529	1890.03
4365.41	2081.66
4465.18	3409.51
686.65	5416.55
284.637	3196.68
1825.2	1857.8
3436.18	3531.61
1479.92	3023.7
3483.13	5362.28
1618.81	2442.87
2492.28	2394.54
6304.07	3733.42
2328.94	1919.7
2715.3	2625.18
2221.34	2799
1159.09	1035.32
7003.44	5419.09
4741.99	4400.73
2625.31	1995.17
1424.16	1087.89
4782.1	3473.95
9560.28	12438.2
2975.48	4400.73
16173.4	18545.8
5242.8	5977.03
4822.2	3688.48
9320.64	8469.93
3355.98	3808.03
2381.76	2363.17
3035.15	3497.69
22121.5	24352.4
3301.42	4395.35
4346.34	4546.7
7062.93	10391.3
3413.89	4631.18
5976.09	6359.4
938.589	1412.32
1318.93	1575.11
11408.3	12435.5
3424.11	3116.78
5920.88	7573.73
3548.85	3848.9
3384.24	4326.71
4483.35	2576.49
3046.84	4040.73
1670.65	1561.91
7859.4	9842.24
3112.27	4400.63
3185.89	4383.91
15666.7	15636.7
9736.58	9336.27
9596.51	10797.9
8778.57	9740.17
5308.45	5791.83
3102.05	3581.4
2833.15	3508.36
4163.33	4350.47
1928.3	1671.91
5248.12	5473.29
4610.13	3398.37
12721	8951.73
1280.08	1005.78
8654.85	6151.73
8565.9	8862.86
4343.27	4200.88
2585.72	1984.29
4779.85	4984.92
11066.8	8528.48
3097.96	2262.35
1067.41	1960.53
11384.7	25824.8
2769.76	1833.82
197.329	1180.89
1593.97	720.679
397.724	1612.95
3170.55	8977.25
4104.03	3129.1
811.808	2415.46
287.302	2289.63
18417	24601.6
4751.22	5216.34
2576.52	3163.42
2702.28	2250.91
3855.58	2412.82
3574.41	4702.45
3285.06	3317.41
31511.2	32640.9
6590.57	5746.95
7093.61	8055.06
4820.75	5827.03
2608.21	2993.59
5176.55	4629.42
4883.12	5484.73
9243.77	9005.41
44571.7	47772.5
15903.9	16521.1
2968.11	2314.27
5641.76	5664.24
13976.6	15195.9
6068.11	6572.35
2439.51	2525.46
24251	24350.9
822.032	1068.26
2884.27	1803.9
1497.86	7883.47
5762.4	5946.7
1285.19	5438.97
3374.01	2558.9
3675.63	2588.81
6215.34	4641.74
2137.9	1890.13
6709.17	7108.24
2295.35	2207.79
2125.63	2055.56
4175.6	4493.91
17417.1	15179.1
6316.56	6079.58
5810.46	4119.93
2418.04	1561.91
2330.11	1857.57
2105.18	2045
3068.31	2872.16
3483.41	3133.5
1433.44	1401.76
3528.4	2806.16
7412.6	8021.63
21633.6	22653.4
2564.25	2692.65
3609.17	3006.79
2027.47	1270.65
47970.3	34102.5
6887.07	5040.35
2481.43	2314.27
12052.4	10508.4
1861.84	1776.62
12746.6	10996.7
4521.18	6111.25
4963.89	7793.72
2086.78	1987.81
37252.2	24636.8
844.526	1347.2
6023.12	27604.9
12979.7	8479.2
6026.19	3294.53
1974.31	1986.05
8463.66	6606.67
926.32	1047.14
3422.07	3775.87
8121.15	4791.33
20832	3503.96
679.915	6947.21
2358.74	1516.15
3400.6	2868.64
5694.92	2927.59
2254.45	1694.78
5065.11	3884.98
17108.3	8230.17
2759.53	1844.38
11458.4	4945.32
6121.28	1619.11
155.409	1400.88
6077.31	2779.76
3507.95	2629.29
896.669	4977
448.846	3464.36
2143.01	2470.9
4630.58	4794.85
1699.28	3205.66
1785.16	1486.24
3128.63	4743.81
965.172	1319.93
1609.3	2431.3
1907.85	1641.99
6762.34	4031.93
2833.15	2462.98
3753.33	3584.04
2702.28	3157.26
1258.61	1045.38
358.872	1043.62
5871.8	4876.68
742.283	2052.92
5302.31	4986.68
2960.95	2086.36
1271.9	863.231
5941.33	4171.84
7880.87	10006.8
2298.42	3492.52
848.615	1026.9
14742.4	16660.1
4588.66	4852.93
5190.87	3824.26
9156.86	8447.52
2856.66	3262.86
2183.91	2276.43
3024.34	3336.77
25856.2	28070.4
2985.2	4039.11
4507.87	4554.71
6599.84	10565.5
3787.27	5684.99
7619.15	8495.58
12203.6	13156.1
3801.82	3756.96
6093.58	8298.24
4235.34	4613.49
3328.53	4710.06
4536.96	2834.1
2857.18	3918.19
1587.65	1528.31
8972.09	11330.5
3428.42	4980.46
3014.3	4043.31
19234.1	20026.8
11406.4	11137.4
8698.6	9756.02
9865.33	10619.3
3678.65	4011.4
3438.12	3824.14
2952.23	3358.09
4252.8	3957.66
2311.16	1999.4
7796.63	7971.58
3364.41	2485.61
12900	9174.92
6488.3	4673.11
11304.6	11994.7
4221.76	4075.22
2147.25	1774.36
5391.4	5757.21
14793.1	12207.2
2643.81	1903.67
868.017	1800.39
7410.63	21940.5
2954.17	2068.26
370.483	1198.3
3766.9	10319.5
4436.1	3299.31
705.082	2080.02
220.156	1512.36
22320.2	28860.8
5471.9	6098.98
3230.57	3986.21
3054.06	2571.26
4811.43	2827.38
4243.1	5816.83
3117.1	3246.41
27314.9	27353.5
6048.96	5514.53
5804.56	6772.45
5028.68	6408.84
1646.81	1871.76
4727.05	4458.14
4076.28	4417.83
11028.2	10567.2
35675	37127.9
14697.1	14446.8
3672.83	2741.73
6204.14	6300.52
13141.5	13750.6
6280.76	6942.91
2916.34	3074.26
29408.8	28984.2
852.499	1308.3
3107.4	1831.46
1152.18	8155.48
6318.58	6832.91
1158	5638.81
2959.99	2319.34
3289.74	2548.59
5631.93	4326.3
2131.73	1880.16
7166.23	7939.67
2056.08	2019.56
2029.9	1915.43
4147.08	4621.05
18110	15301.6
6268.15	6268.61
7174.96	4998.93
1441.2	986.686
1711.79	1335.18
2079.36	1912.91
3413.88	3253.96
3848.37	3678.87
1790.35	1711.38
3349.87	2720.73
7189.51	7994.26
21556.9	22990.2
2006.62	2247.12
4253.77	3695.66
1946.49	1357.01
53614.3	37909.7
7411.6	5394.44
2554.59	2405.83
12943.6	11754.6
1752.52	1634.96
10551	8729.86
3460.43	4599.22
4849.26	8058.92
1245.29	1117.68
39570.9	25765.5
631.373	1236.09
4436.1	22238.6
10580.1	7210.79
4259.59	2504.08
1360.7	1461.97
5701.76	4588.3
979.55	1158.83
3244.15	3555.43
6136.25	3678.03
23868	4476.62
643.011	8900.33
2694.25	1745.8
3484.68	2895.4
5724.06	2962.58
2250.05	1788.63
5128.57	3908.12
20280.6	9754.34
3268.4	2148.88
14060.9	6397.08
6355.43	1703.82
125.111	1681.15
4106.35	1994.37
3784.36	2844.17
682.775	5071.99
269.619	3395.04
2090.03	2214.38
3525.41	3470.62
1303.48	2902.12
3252.88	5140.84
1828.17	2693.86
2228.72	2092.61
5557.25	3393.36
2463.42	2104.37
2975.5	2871.89
2327.64	2991.97
1286.02	1096.69
6107.15	4738.61
4362.39	4102.09
2702.01	1993.53
1208.43	918.668
5060.68	3488.25
8460.01	10594.9
2500.28	3618.41
965.002	1064.78
14879.5	17138.9
4798.82	5452.39
4618.43	3447.94
9101.08	8616.5
3474.98	3731.77
2221.93	2334.46
2907.61	3444.58
26137.5	27909.4
3637.54	4568.35
4476.89	4425.13
7464.3	10167.5
3217.86	4690.58
6201.05	6945.57
1066.63	1397.51
1515.91	1941.18
10972.9	11871.5
3396.52	3252.03
5911.4	7560.4
3647.05	3867.77
3695.68	4536.42
4630.17	2890.79
3154.44	3896.05
1627.96	1548.93
8079.55	9909.34
2995.87	4159.68
3305.61	4350.33
15696.1	15385.3
9466.48	9114.8
9983.41	10993
8758.22	9555.4
5169.3	5752.4
3214.69	3518.39
2987.41	3495.59
4136.5	4395.03
2219.95	1866.38
6006.54	5971.33
4819.4	3464.57
13228.8	9345.59
1353.11	1022.59
9011.92	6240.43
8530.93	8751.74
4566.75	4304.72
2629.05	1988.62
4901.85	4894.92
10450.7	8396.89
3264.38	2440.16
1065.57	1889.19
11113.5	24152.6
2906.01	2099.91
232.566	1165.8
1597.3	743.451
482.045	1652.01
3713.65	9684.93
4291.9	3255.68
899.607	2596.15
386.905	2355.33
18631.7	24704.5
4782.4	5189.56
2563.51	3206.42
2725.25	2371.75
3681.94	2282.35
3717.88	4738.02
3159.72	3002.99
30443.9	32253
6892.4	6177.49
6879.72	7853.21
4842.65	5767.9
2617.42	3097.86
4970.56	4637.67
5062.53	6036.09
8913.61	9107.5
44721.3	47901.1
15612.6	16881.4
3195.66	2437.42
4985.36	5307.24
13193.9	14506
5308.84	6159.24
2339.4	2637.2
24231.2	24610.5
3111.1	1786.11
1377.42	7346.03
5577.35	5717.73
1279.11	5292.64
3343.66	2705.61
3513.86	2619.87
5909.28	4714.3
2016.98	1854.52
6467.44	6910.9
2386.97	2347.12
2274.92	2263.19
4298.24	4725.25
18509.1	15516.7
6593.24	6746.7
6123.88	4521.82
2265.4	1561.7
2426.08	1891.01
2179.78	1953.95
3145.98	3158.07
3209.41	3095.13
1448.25	1413.01
3561.43	2633.55
7535.13	8536.46
20570.4	21523.6
2675.56	2826.03
3746.42	3432.65
1857.35	1170.37
47651.7	34143.1
6361.73	4847.48
2770.7	2673.69
11102.9	10131.9
1757.99	1703.1
12414.8	10538.8
4148.13	5572.69
4675.63	7402.58
2500.08	2254.07
35533.9	23463.9
815.037	1270.71
5978	27068
13777.4	8568.39
6312.05	3195.47
2037.06	2009.6
8564.76	6621.73
959.862	1023.5
3278.12	3692.63
8200.06	4713.39
20888.6	3861.38
687.126	7580.46
2440.88	1561.7
3373.26	3101.51
6121.77	3094.22
2290.77	1745.97
5174.59	3958.99
16747.9	8694.27
2658.65	1870.03
11893.6	4900.39
6149.25	1702.18
142.711	1692.15
6229.59	3096.04
4088.93	2980.19
949.291	4750.79
404.876	3244.73
2300.29	2425.57
4860.62	4722.51
1683.99	3181.79
1942.98	1627.38
3073.04	4892.18
986.29	1361.02
1641.7	2491.25
1884.84	1709.48
7311.02	4298.33
2934.56	2437.42
3761.22	3633.33
2465.2	2907.21
1273.83	1001.61
393.248	1109.25
6358.56	5447.72
871.064	2038.79
5305.67	5148.51
3079.38	2051.56
1282.28	1125.67
5467.41	3870.51
7671.5	9544.45
2324.6	3431.73
14660.1	15751.1
4480.06	4937.79
4958.94	3768.34
8887.18	8623.12
2888.04	3132.53
1875.33	1945.74
2925.04	3308.59
25644.6	27875.3
2657.11	3409.97
4356.33	4415.71
7073.88	10157.1
4246.54	5924.31
7958.24	9016.95
11817	12869.1
4062.22	4116.59
6903.65	8876.5
4268.7	4831.01
3458.88	4441.72
4151.86	2548.16
2801.15	3788.85
1698.21	1682.01
9576.88	11527
3505.21	5093.71
3249.37	4361.95
19875.9	20991.3
11254.9	10779.6
7920.97	8824.48
10111.7	11074.4
3916.17	4135.66
3887.96	4201.55
2989.5	3572.97
3974.59	4096.64
1635.76	1531.15
7648	7940.12
3212.1	2316.66
11396	8289.53
5396.81	3937.98
12330.7	12770.3
3994.73	3828.74
1876.5	1418.44
5448.18	5768.25
15857	13412.7
1753.61	1222.49
777.592	1682.88
7612.75	20974
2378.1	1726.23
1314.45	593.038
407.934	1352.54
4305.97	11045.8
4621.24	3494.07
860.186	2535.15
265.912	1854.54
20525.6	28015
4875.06	5926.05
2794.1	3656.2
2727.62	2292.39
4320.07	2464.06
4144.81	5763.91
2697.4	2881.09
24548.6	25493.7
4840.82	4452.99
5634.52	6677.75
5682.87	6742.77
1841.24	2129.39
4175.03	4032.49
4275.75	4746.91
12291.4	11706.4
35962.6	37823.5
14071.2	14423.7
2760.86	2023.61
6050.52	6334.41
13345	14590.1
6040.44	6689.02
2551.35	2639.19
31457.2	32436.8
902.491	1107.18
830.976	1114.11
3152.67	1844.14
1212.72	7686.09
6564.21	7052.3
1238.91	5544.56
2062.84	1628.25
3036.84	2314.06
6776.74	5148.33
2110.18	1942.11
7246.11	7638.4
2018.52	2044.42
2008.44	2005.4
3999.77	4377.56
18128.4	15277.7
5999.15	5935.58
7187.69	5132.73
1263.08	857.478
2055.79	1500.8
1985.28	1833.74
3293.69	3093.51
3415.56	3255.64
1233.87	1154
2404.29	1951.65
7239.06	8033.76
20316.1	21581.7
2472.78	2499.6
3430.67	2895.83
2074.92	1407.16
53874.5	39837.6
7707.43	5844.55
2025.57	1968.99
13322.8	11664.8
1894.63	1601.38
11029.3	9260.58
3446.79	4720.89
4845.85	7717.3
1094.87	1018.74
38709.4	24988.2
733.274	1236.36
4728	23006.2
11525.9	7777.99
4767.29	2939.18
1479.64	1402.83
4427.85	3477.6
1020.34	1233.76
3469.96	3850.41
6571.26	4062.83
26546.9	4621.19
682.911	9122.73
2784.02	1805.12
3537.44	3052.76
6089.8	3069.23
2423.43	1808.59
5145	3841.74
22396.1	10489.1
3419.59	2300.19
15273.8	5952.92
7031.57	1811.19
176.268	1882.29
3859.76	1786.92
3200.01	2371.29
705.071	5398.9
279.007	3072.7
2049.74	2316.66
3845.66	3883.36
1430.29	3029.35
3312.83	5013.08
2005.42	2911.44
1888.58	1736.63
6432.26	3859.08
2365.01	2103.38
3033.82	2862.02
2273.35	2902.77
1192.58	1028.28
5902.45	4805
4162.94	3866.02
2001.39	1436.64
7607.71	5719.7
8232.21	10538.6
2689.34	3874.69
14884	17294.3
5242.71	5649.47
4917.37	3563.43
6973.15	6553.76
3557.59	3820.93
2106.15	2320.13
3137.57	3615.45
25926.5	28018.4
3528.26	4559.34
4829.85	4590.96
7396.52	11188.8
3595.01	5085
6452.66	6321.48
1017.91	1495.7
1471.59	1688.98
11841.5	12808.3
3556.42	3209.97
6274.32	7679.89
3586.67	3900.01
3707.65	4618.05
3607.53	2118.9
3328.02	4235.1
1806.37	1585.11
8766.94	10153.8
3237.28	4425.67
3512.62	4492.51
15604.5	15285.7
9531.42	9117.78
9816.14	10877.2
8982.83	9669.64
5375.31	6013.49
3308.2	3685.95
2877.47	3357.19
4258.32	4269.42
2041.03	1663.69
5841.5	5756.08
4822.55	3435.77
12981.5	9298.42
1312.02	963.712
9327	6512.06
8835.78	9106.94
4758.93	4565.67
2486.37	1900.33
4991.51	4975.72
11230.4	8621.93
2917.1	2211.03
1120.12	1939.17
11310.7	25966
2764.83	1765.75
193.987	1281.64
1649.93	718.946
524.598	1698.92
3647.16	10054.4
4336.54	3313.83
192.944	1001.65
906.314	2619.27
375.458	2400.7
19224.5	25425.9
4925.8	5436.35
2729.37	3312.93
2569.8	2196.58
4055.99	2572.31
3587.71	4749.01
3343.66	3537.83
30304.7	31551.4
6292.05	5649.5
6950.14	7915.63
4641.08	5723.57
2452.99	2855.91
5263.71	4639.73
4768.32	5644.99
9533.5	8944.37
44546	47485.6
15711.9	16505.9
2786.73	2173.09
5419.11	5660.34
14644.9	15632.6
6026.1	6517.48
2251.7	2427.8
23261.7	22336.1
783.247	1079.32
3271.7	1631.18
1516.43	8126.07
5635	5833.76
1285.94	5616.99
2923.36	2282.38
3436.48	2560.57
5839.41	4441.02
2041.03	1782.91
6410.95	6997.98
2193.3	2337.48
2155.75	2108.97
4132.12	4588.25
17330.5	14624.6
5816.47	5904.21
6097.02	4328.12
2332.01	1569.76
2421.7	1839.81
2162.01	1974.39
3280.04	3024.81
3442.74	3082.61
1294.29	1225.64
2706.43	2165.87
7523.76	8278.71
20552.2	21521.4
2555.2	2643.66
3459.43	2735.79
1957.6	1269.9
46938.5	33188
6223.22	4435.61
2226.67	2104.45
11490.1	10072.5
1766.74	1632.98
12760.4	10334.4
4159.24	5532.99
4896.6	7381.84
1820.97	1692.59
36261.9	25369.9
823.922	1334.02
6226.34	29045
13076.4	8389.81
5870.7	3235.26
2124.47	2087.29
7998.3	6374.77
949.074	1063.97
3434.4	3768.14
8089.03	4684.89
21307.2	4143.87
806.192	7977.04
2711.64	1864.2
3468.81	3004.94
5894.69	3053.71
2375.81	1750.4
5301.26	3965.04
17456.7	8341.94
2709.56	1852.46
12077.2	5393.9
6098.06	1826.27
176.257	1670.01
6069.9	3099.78
3367.65	2530.76
900.056	4822.17
406.746	3659.76
2268.39	2445.86
5407.64	5025.39
1683.3	3336.41
2035.82	1588.73
3143.42	4907.07
948.031	1273.51
1763.61	2474.76
1814.71	1549.89
7202.54	4226.06
2923.36	2487.41
3680.53	3688.66
2682.44	3006.75
1444.47	1149.77
5426.41	4467.22
763.431	1866.91
5005.06	4610.83
2534.34	1761.24
1147.23	905.908
5378.44	3811.5
8170.38	10388.6
2335.14	3433.06
15493.9	17657.5
4771.45	5032.62
5452.48	4002.97
8320.57	7533.57
2986.98	3209.97
2077.53	2215.54
3046.42	3412.28
24170.1	26292.1
2697.29	3736.28
4236.63	4175.41
8210.19	12552.5
4591.62	6978.07
8613.78	10104.6
771.257	1111.45
11270.9	12716.8
4520.83	4390.44
8050.65	10713.4
4837.79	5076.36
3799.23	4659.91
3565.74	2292.76
3351.27	4439.44
1823.55	1763.8
10086.6	12538
3505.52	5246.03
3363.95	4498.41
21353.2	20890.7
10176.4	9600.18
7731.59	8738.24
9843.56	10503.9
4574.72	4907.6
3565.74	3996.67
3144.19	3754.42
3584.76	4044.76
1493.91	1279.3
8960.31	8844.39
3480.16	2544.99
11388.2	8306.36
5631.23	3853.32
12907.5	13391.8
3523.48	3517.62
1919.69	1506.12
5093.46	5407.53
14952.9	11765
1797.13	1223.95
634.966	1321.03
6126.74	16622.7
2207.06	1575.08
215.529	1122.33
1856.3	855.587
465.924	1601.39
4174.3	10532.9
4408.84	3186.45
324.35	1303.8
999.464	3201.87
377.176	2534.1
21288.8	28747
5503.39	6209.59
3168.49	4134.58
2418.37	2182.97
4538.79	2948.74
4423.63	5990.02
2291.58	2651.14
22333.7	22456.7
5239.26	4483.89
4790.24	5530.01
6122.51	7322.85
1513.99	1745.65
3852.06	3514.89
4252.48	5125.36
14285.2	14380.8
38981.2	41692.4
13050.1	13748.4
2522.96	1983.37
6025.31	6264.93
12263	13589.6
5967.2	6997.12
2335.96	2436.11
30714	31869
1051.23	1211.25
875.852	1185.85
2877.95	1621.35
1123.08	7096.02
7573.11	7612.28
1178.02	5121.73
1866.86	1482.53
3234	2303.64
7894.29	5998.18
2069.72	1907.15
7685.1	8456.98
2274.68	2189.32
2297.92	2249.21
4164.79	4512.93
20569.3	17777.7
5241.38	5071.83
8791.27	6354.75
1060.74	686.829
1399.88	1127.78
2079.22	1968.85
3650.26	3363.37
2620.16	2555.87
1266.76	1184.94
2431.04	1826.4
8316.9	9161.95
19866.7	20588.5
1653.45	1817.33
3123.06	2796.31
2594.8	1746.56
57416.4	43556.9
9102.94	7164.07
1975.69	1873.58
13451.6	11755.9
2198.61	2035.99
10111.9	8493.27
3612.23	5233.33
4810.32	7758.35
35346.8	24326.6
936.073	1419.02
4469.06	21345.2
11222.3	7272.95
4547.25	2488.73
1466.44	1429
4599.02	3537.58
1018.48	1169.51
3303.73	3568.42
6530.33	3738.09
24921.1	4603.66
1052.29	9298.95
2823.01	2045.97
3935.52	3252.68
6440.52	3289.88
3099.82	2451.53
5582.63	4229.85
20902.1	10248.9
2869.5	1850.9
16255.6	6482.68
7252.98	2015.12
288.429	2094.96
2763.85	1496.14
3281.54	2324.51
656.097	5046.42
246.168	3156.51
2176.42	2323.6
3555.18	3665.51
1602.74	2956.9
3735.84	5911.99
2020.06	2955.99
1530.89	1442.61
6306.35	3975.8
2255.66	1880.84
2290.53	2067.74
2069.72	2381.67
1204.43	926.357
6387.7	5471.95
4395.11	3889.61
2113.03	1513.38
1001.58	703.16
4345.45	2987.75
8218.64	9988.5
2538.81	3608.35
14787	16068.3
5836.2	6077.12
5111.43	3797.97
6632.81	6273.1
3393.53	3474.97
2101.41	2150.31
3432.62	3728.11
20809.1	22285.2

## Sheet: Fig2S7B
charge_M	charge_T
92.2056	92.1522
96.584	96.4317
96.4017	96.2948
96.114	96.6233
95.0403	95.3723
97.0663	97.0915
97.412	97.1039
97.2833	97.2259
98.1073	98.6137
97.9911	97.8205
95.9626	96.5761
97.2086	97.7461
96.5435	97.6273
97.2005	96.9964
97.3731	98.0086
97.4124	97.5805
96.1695	96.0723
94.8846	94.8569
97.0471	97.5045
97.31	97.2602
96.2441	97.0322
96.945	96.6549
96.3624	96.5339
95.9422	96.0128
97.863	97.8247
97.25	97.9882
95.0876	95.7714
95.9398	96.0392
96.1475	96.555
97.3811	97.3384
96.2796	96.3573
96.1774	96.7486
96.3584	96.805
96.3488	96.7868
97.1025	97.5952
98.2105	97.7718
98.0634	97.7045
92.1421	93.4811
92.5297	94.6625
98.7775	98.5075
98.0407	98.3389
98.4099	98.4036
98.0469	97.9545
98.5149	97.8677
97.2	97.8386
97.6645	97.9528
97.0433	97.667
97.671	97.8491
96.2901	96.6563
98.5135	98.7794
98.428	98.7154
98.1403	98.2172
96.1417	96.3213
90.7325	90.6091
92.9044	94.0658
93.5357	93.7979
95.3079	93.9565
95.3849	94.9815
98.1866	97.6392
98.4094	98.4486
97.3889	97.5109
96.6477	96.8805
92.0654	91.7595
97.2447	97.9466
97.1767	97.7384
97.4428	97.4759
94.7515	94.8138
90.5925	90.8241
96.8354	96.2777
97.783	97.7589
98.2187	97.8397
97.7843	98.3088
96.7829	96.8567
98.4508	98.0893
98.7443	98.5846
98.9376	99.1255
98.979	98.8259
96.4706	97.2034
97.2096	96.985
98.1155	98.2474
98.2098	97.7428
98.0786	98.2422
96.5231	96.8501
96.5367	96.4692
98.0007	98.0637
97.6571	98.4712
97.748	98.2609
97.6396	98.4024
97.9653	97.304
98.1587	98.2057
88.433	88.3784
95.3823	93.9296
13.3034	13.9275
10.8457	11.2933
93.4007	94.7021
23.9477	23.8881
16.5618	16.7923
24.9617	24.3587
85.9092	85.7184
96.7641	97.2233
97.9527	97.7227
96.8879	97.1097
97.4082	97.6858
96.216	97.472
86.919	87.4432
96.9814	96.9081
97.4181	97.6248
93.6795	94.2731
94.8335	94.7305
95.0995	94.5417
95.6974	95.3383
76.7497	77.6818
95.0642	95.8148
94.9721	94.4885
95.5756	95.1147
92.9742	93.7899
94.7961	92.5079
93.1196	93.2389
91.6851	89.7066
87.0306	88.8567
82.195	81.4844
80.2573	81.4208
82.4835	82.1466
81.0279	84.0278
82.8599	84.9479
93.778	95.0968
94.5736	92.6962
93.0606	93.4285
96.1121	95.9585
96.0171	96.113
95.8904	94.2763
95.1571	95.0101
93.9796	94.0479
95.5086	95.1683
97.5119	98.1039
98.0198	98.2292
82.0687	81.9724
93.8353	93.8127
97.0173	96.8663
97.0104	96.8213
97.2751	97.0042
99.1722	98.8397
97.6972	97.574
97.2651	97.4195
89.4973	89.8249
80.2817	81.4641
98.5332	98.3738
98.1538	98.6702
98.2414	98.758
98.1985	98.5742
97.9844	98.2091
98.3896	98.3161
85.4466	85.7841
98.7517	99.1504
98.7457	98.5475
99.1346	98.8946
96.3279	96.6415
87.9772	88.0007
94.7264	94.7001
94.935	94.8699
93.757	94.7271
92.3675	93.0753
93.4893	94.7486
92.6545	92.9727
96.0642	95.5628
96.1941	94.9745
96.7134	96.9706
97.675	97.2864
97.5287	97.5
93.8633	94.878
96.6349	96.8568
95.3125	95.2356
95.7981	95.383
96.7054	97.051
97.0713	97.1224
95.0454	94.8352
94.0095	94.0132
97.6006	97.1031
96.0764	96.3845
96.2431	96.1206
96.5177	96.7861
94.2347	95.6502
94.8548	95.4716
99.0499	98.7677
97.0803	96.9486
93.7691	93.8647
94.2208	94.4924
94.2666	95.0285
95.3993	94.8395
96.3768	96.5746
93.6289	93.3809
92.1332	92.6753
96.0973	96.1262
95.7337	95.3795
96.474	95.936
96.4777	97.5313
97.6945	97.6463
93.1389	94.2881
100	99.505
91.6194	93.6269
97.4359	97.5065
97.5739	97.722
97.7691	97.2986
98.3668	97.9016
97.5439	97.0087
96.8277	96.5964
96.6622	97.1036
97.5171	96.7726
92.8025	93.6237
98.3077	98.187
98.5302	98.2905
97.6898	97.8291
95.715	95.5353
90.4931	91.1655
91.7138	91.7298
87.9046	88.9498
89.6245	89.4494
91.5191	90.95
97.2849	97.3655
97.4032	97.8298
96.6283	96.9592
96.1838	96.3485
93.2229	93.2762
96.2811	95.6464
96.2361	96.2524
96.1396	96.5291
93.0049	93.9046
13.3021	13.8994
95.5936	95.7384
97.4749	96.4675
96.95	96.9615
94.4178	95.5159
96.6251	96.8811
96.9836	97.2524
98.4135	98.4987
98.3796	98.4351
96.3687	97.0364
96.0236	96.2586
97.8117	97.1092
97.3944	97.2341
97.4112	97.4426
94.5961	95.3908
93.4944	94.527
97.6331	97.2185
96.7369	97.6558
96.6362	97.252
97.7316	97.6905
97.2854	97.5319
97.8842	98.2609
83.2903	85.7143
95.8215	94.8915
96.839	97.2368
96.9464	97.0773
98.328	97.7721
94.0642	94.3475
96.8407	96.6607
96.2335	96.6626
96.8294	96.7433
86.4242	87.0224
96.4039	96.1859
95.5789	96.1918
96.1406	96.4147
96.7895	97.212
96.2573	96.638
85.3952	86.2462
95.4461	95.1185
95.5224	94.933
89.6241	92.5731
93.9866	93.3364
94.9773	95.4061
94.0344	94.2846
72.8483	73.2372
95.5899	95.1724
93.3884	93.5003
95.3979	95.1819
92.7645	93.1497
93.1877	91.8591
92.5652	92.3204
92.7933	92.1465
88.4125	88.8859
78.4191	82.9068
80.3203	79.9205
81.6342	82.1675
80.2191	80.2649
84.0028	84.7224
94.1783	94.569
92.9825	92.2671
93.168	93.5446
95.997	95.2972
94.4191	95.4398
92.0455	93.377
94.7104	94.542
92.0551	92.5771
95.015	93.8473
93.5591	94.6631
97.093	97.4241
93.7895	92.7509
96.8149	96.7141
79.1849	78.9051
93.2878	94.0579
97.5313	97.1853
96.7984	96.8333
97.5501	96.5593
98.0315	98.8218
97.191	98.2563
97.5409	97.6087
97.7212	96.9592
97.084	97.3327
88.7518	88.2018
82.5963	83.3633
98.3586	98.4704
97.8858	97.5822
97.525	97.8742
87.3743	86.332
97.1628	97.2555
96.9299	96.6678
97.5944	97.2481
85.8446	85.1714
96.953	97.8921
98.6111	97.8232
97.4018	97.8116
95.7807	96.0075
90.6556	91.2642
93.6508	94.3144
94.5998	95.1843
94.9568	94.2781
93.7644	93.2412
94.9333	95.0717
96.5733	96.5665
96.5812	96.5412
96.9582	97.6159
97.0286	97.7459
93.0514	94.1332
96.2614	96.8123
95.9403	96.6529
95.4735	95.5105
96.4044	96.8954
95.9202	97.0297
96.1484	96.2581
95.9227	95.6233
97.2249	97.0783
96.2292	96.3683
96.7249	96.2388
96.4418	96.5571
94.7435	95.9147
95.3684	95.7495
98.5496	98.9626
96.9869	97.8412
95.2724	95.4545
95.1247	95.7217
95.9046	95.9888
96.4488	96.7461
95.3434	95.1161
95.0713	96.2505
96.2336	95.7045
95.3624	95.4457
96.2562	97.0254
95.0668	96.5702
96.703	97.0195
92.1517	93.5098
97.6501	97.6557
97.2243	97.6211
97.5088	97.532
97.9564	97.627
97.3568	97.519
97.2957	97.2807
97.2155	97.4837
97.2431	97.2118
95.5869	95.6881
98.4916	98.3581
98.5954	98.5633
97.2499	98.108
96.0818	96.1161
89.9297	91.4825
91.635	92.6792
91.1384	92.7138
94.5962	93.9434
95.0292	94.5097
96.8903	97.0393
97.5861	97.7313
96.5396	96.737
95.5202	95.772
94.5709	94.8676
96.085	96.2332
96.2029	96.3364
96.1994	96.7099
94.1159	93.7969
9.20168	8.8236
96.0541	96.8876
96.4645	96.6639
98.2526	96.9267
94.2272	95.2298
95.5731	96.8808
97.9424	98.204
98.2711	98.3006
97.7232	98.4545
95.3765	95.901
95.3676	95.9343
96.7742	97.1439
97.2222	96.5421
97.2651	97.6375
94.5139	94.8516
94.1475	93.9495
97.2497	97.6755
97.5464	97.7124
96.8984	96.6451
97.3291	97.7947
96.8134	97.2821
97.2282	97.8383
87.906	88.1175
95.1001	94.1355
96.2514	96.5552
96.5598	97.16
97.3684	97.5168
94.7164	94.1213
95.9202	95.7678
96.0389	96.4502
95.6378	95.7101
89.4276	88.6967
96.1431	96.4458
96.9905	97.7475
96.1183	96.4372
97.5673	97.0161
96.1567	96.2661
84.61	82.8105
95.0694	94.5906
94.7761	95.9234
91.357	92.6554
92.716	92.3525
94.5233	93.4967
93.8705	92.4479
75.5864	75.1265
93.5834	93.7707
92.9835	91.0256
94.6171	93.7474
90.6377	91.7194
90.5405	90.2981
92.1702	89.9108
87.0143	86.4425
84.1374	85.1036
79.6794	78.4528
79.9721	80.8271
80.5281	80.3591
80.2075	81.015
81.5853	84.2296
92.0418	94.5323
91.4286	91.6013
91.8896	93.2395
95.551	94.6471
94.051	95.4364
94.6043	92.2098
93.7891	93.0868
92.4679	92.1986
94.4196	94.3466
97.256	96.9945
96.789	97.3554
74.8708	74.4296
93.7679	93.1261
95.3903	94.8443
95.643	95.6818
96.0164	96.3991
98.9676	98.1289
97.2355	97.3777
96.7435	96.6313
85.5027	84.8087
81.4545	78.9727
97.8119	98.5319
97.2083	96.7918
97.2526	97.089
88.9098	86.7376
96.9157	97.0679
96.0683	95.8841
96.9329	97.011
82.7382	82.4346
97.9816	97.7219
97.1405	98.1581
97.4977	98.0237
95.7997	95.8543
89.8507	89.2608
95.8844	96.0844
95.7863	95.4128
94.7305	95.3496
93.7331	94.2264
96.5009	96.686
93.8239	95.5123
97.2276	97.155
95.8772	96.2771
97.3474	97.5026
97.9885	98.4205
97.4663	97.7793
95.1113	95.1259
96.6239	96.9834
96.654	96.1844
95.4624	96.027
96.9076	97.3257
97.673	97.8135
95.4498	95.1847
94.0333	93.7762
97.5008	97.1257
96.5484	96.8983
96.7222	96.6198
97.2197	97.4898
95.6304	95.8721
96.563	96.7372
98.811	98.9216
97.2511	97.5554
94.741	95.1254
95.1808	95.4206
95.0502	95.4106
96.1907	95.8629
97.5494	97.3982
94.5136	94.9217
92.76	94.134
96.7172	96.5306
96.0975	95.9542
96.3728	94.8734
97.3639	97.9407
98.0832	98.1445
91.1181	91.3888
98.6425	98.3038
92.2186	92.8492
98.4649	97.9751
97.2389	97.552
97.7197	97.5775
98.1439	98.2456
97.5936	97.2603
97.2875	97.0789
96.8384	97.1369
96.9163	96.38
94.4697	93.6318
98.4498	97.8358
98.6777	98.4861
97.7163	97.744
96.7413	96.4839
91.039	92.6096
92.9865	92.9943
89.0661	90.5931
89.2516	91.152
93.0982	93.1647
97.5946	97.8172
98.1009	97.9233
96.5188	96.7685
96.3688	96.656
88.9075	89.8338
96.8705	96.8584
96.9012	96.8832
97.3153	96.9727
91.4919	93.0219
89.6784	90.299
98.3676	97.2272
98.0449	98.2816
95.7255	96.4536
97.7324	97.9675
97.3297	98.0286
98.6249	97.9298
98.7363	98.6173
97.2472	96.7672
96.5528	96.7219
97.7413	98.1119
98.5426	97.8966
98.7365	98.5133
95.8955	96.5824
95.9861	96.6834
98.0346	98.7302
98.4018	98.2271
97.856	97.6583
98.115	98.0562
97.8308	97.9702
98.3641	98.3522
85.5698	85.3468
95.1842	94.7104
97.6638	97.8494
97.4973	97.8744
98.0936	98.1659
94.2353	94.6508
96.0868	96.8607
97.3889	97.4028
97.4584	97.5808
78.6864	79.2573
96.535	96.3898
96.8839	96.8706
96.6805	96.7657
96.4187	96.7535
96.0911	96.6713
87.7934	86.734
96.8374	96.5177
95.5501	95.5013
89.8126	93.2486
94.9836	94.3556
95.2452	95.5501
95.1613	92.9972
72.42	73.0366
95.8333	93.7255
94.283	93.6375
95.6116	95.8361
93.7044	94.1821
91.9028	93.5312
94.6476	92.9444
93.8035	92.6746
88.5465	89.0709
78.7234	81.792
81.4585	82.2347
81.8782	81.9922
81.4448	81.2886
83.3947	85.5036
94.7253	95.8313
96.3636	93.2945
92.9419	94.1332
96.3195	95.7508
95.7825	95.2381
92.2481	92.4254
93.913	95.7829
92.9759	91.9175
94.5386	94.8954
93.2319	94.1206
97.693	97.4713
91.4737	91.2387
96.3303	97.2101
78.4798	77.7212
93.4574	92.3063
96.4274	96.7138
97.0814	96.5465
96.4661	96.7112
98.1377	99.0236
98.1233	97.8102
96.5954	96.5452
97.6471	96.9567
96.508	96.7905
88.6939	88.7673
85.5914	84.9931
26.4313	23.8976
98.4382	98.227
98.1768	98.3146
97.7934	98.0001
97.6754	98.1726
98.101	98.0021
86.1417	85.8976
98.5214	98.3732
98.4127	98.8497
98.7126	98.811
94.2285	94.5294
91.5868	91.4047
94.7504	95.0279
95.599	95.3082
94.3147	95.1911
93.6249	94.1116
95.5406	95.3288
96.8818	96.7452
96.8668	97.131
97.5427	97.6441
97.8255	97.8078
93.9462	94.2648
96.4858	97.2352
97.028	96.5616
96.0598	95.7782
97.139	97.1678
97.0976	96.9665
96.4247	96.4973
96.3478	95.7964
97.4178	97.4773
96.4959	96.6607
96.5599	97.2308
96.8277	97.1898
95.4926	95.982
94.7468	95.653
99.1525	99.0099
97.5625	97.9519
94.9501	95.4116
96.0469	96.061
96.3705	96.9152
97.2002	97.3375
95.9333	96.1225
95.9596	95.571
95.9307	96.1339
95.6634	95.85
97.1737	95.9854
97.1132	97.039
97.5851	97.3366
92.1043	92.2941
93.0023	91.1805
99.5062	97.7245
97.2832	97.5957
97.8601	97.5395
98.8331	97.5201
98.893	97.3087
97.5266	97.4439
97.0512	97.0278
97.5139	97.2188
95.9366	96.1113
98.2472	98.138
98.8662	98.6451
98.2765	98.0554
96.5745	96.8385
92.4579	92.0129
93.2789	92.915
93.832	93.9546
95.6074	95.6748
96.0561	95.586
96.9314	97.7218
97.7221	97.642
96.7162	97.0699
96.5581	96.7216
94.1615	94.2379
96.8212	96.6403
96.5191	96.6281
97.4949	97.0443
93.7391	93.9108
90.5259	91.2115
97.237	97.0297
96.9988	96.8188
96.4552	96.7075
97.2371	97.1936
95.2958	95.1096
96.503	97.5122
97.6097	97.4561
98.5375	98.4995
98.3435	98.7117
95.5842	96.3607
96.2844	96.1219
97.7475	97.3303
97.561	97.4131
97.1242	97.6216
94.948	95.5091
94.8726	95.0896
97.4362	97.4851
97.5136	97.8785
97.1285	97.3849
97.8389	98.1197
97.0426	97.6318
98.0796	98.0887
81.7028	83.6512
94.1221	93.7324
97.5728	97.4454
97.0713	97.3483
97.4088	97.8287
93.9051	94.7397
95.6484	96.4286
96.8719	97.0853
97.1574	97.0821
89.2294	89.9733
96.6117	96.6245
96.9773	97.0331
96.5743	97.0247
96.9583	96.9993
96.5831	96.3033
83.2123	85.9636
95.7542	95.5127
96.7784	95.625
91.9264	93.1725
94.6821	93.7964
94.3542	94.6323
94.4112	93.1996
70.7744	70.9642
93.5167	94.6372
93.1986	93.2105
94.6784	94.721
92.533	92.4923
89.6104	90.8695
92.864	91.5441
87.9483	87.2473
85.1981	87.3045
79.4196	80.1056
82.0906	80.5712
81.1586	82.0207
81.3811	79.6367
82.9751	82.842
93.3532	93.4412
91.7098	90.6197
92.3767	94.1468
95.3963	95.2806
95.0071	95.2912
90.9747	92.5264
93.3021	94.1872
91.8837	92.2795
94.8592	93.1661
97.2812	97.6932
97.155	97.2099
83.1812	80.8719
92.4857	92.49
95.2286	96.0118
96.1527	95.6522
96.0366	96.1297
99.0107	98.8051
97.277	97.4553
96.0963	96.9654
88.2431	87.0934
8.71976	8.70551
97.6132	97.7912
98.3546	97.7647
97.6152	97.6282
96.8739	97.1077
97.7251	98.2166
84.2382	83.4174
98.0251	98.3333
97.9583	98.6774
98.7493	98.6953
95.4717	95.7029
84.985	88.222
94.4433	94.5539
94.9031	95.2125
94.6068	95.0202
92.4288	93.1154
93.9981	94.9602
89.6783	93.0953
95.1748	96.0314
95.7682	96.1855
96.447	96.5926
97.7153	97.37
97.0472	97.4381
92.4138	93.6029
96.1174	96.3701
94.6188	94.7368
95.2694	95.1558
96.4121	96.3698
97.3427	97.0665
95.1314	95.1554
94.9144	94.0838
97.2365	97.3291
96.6489	96.4651
95.7836	96.0279
96.6253	96.3745
94.8948	95.6266
95.9694	95.5001
98.3463	98.6201
96.5981	97.2419
93.7402	94.7787
94.9633	95.035
92.3754	92.8753
95.3105	95.8003
96.7269	97.0309
94.3563	94.0306
91.5612	90.6873
95.5996	96.1796
94.6303	94.905
95.5556	95.1011
97.6249	96.564
97.6733	97.7745
92.6966	94.0763
98.9362	98.2562
91.564	92.4439
99.2079	97.1168
98.0658	96.9688
96.693	97.2445
96.8912	96.9919
97.1363	97.3886
97.019	96.8873
96.7525	96.3592
96.3688	96.543
95.5947	95.5514
93.2265	94.4162
97.9995	98.016
97.7005	98.0581
97.2868	97.6419
95.5274	95.6072
91.6126	92.1188
89.6369	90.2108
85.751	85.1772
86.7561	88.0136
88.9916	89.9599
96.9352	96.9914
97.2563	97.526
96.2514	96.6046
95.7514	95.8226
92.268	91.9713
95.9342	96.0342
96.1097	95.8562
96.1792	96.5652
91.6228	92.9675
87.6126	87.7441
94.8413	96.2346
97.18	97.3963
96.8214	97.1934
94.967	95.1932
96.4555	96.878
97.5625	97.6086
98.1707	97.7231
97.8189	98.0364
95.9586	95.4018
95.4667	95.6762
96.5974	97.5317
97.3363	97.7444
97.6695	97.7261
94.1962	94.8271
94.0482	94.14
97.1149	97.1964
97.3833	98.0285
97.0024	96.4798
97.2897	98.5129
97.8988	96.6238
97.7904	97.0512
82.0775	82.9299
95.0893	93.4783
96.7294	96.9846
96.7734	96.7509
97.4513	97.4007
93.6677	94.104
95.7592	96.223
96.0676	96.1513
96.1198	96.0394
87.1836	86.3571
95.4606	96.3845
96.4903	96.6068
96.4513	96.5892
96.1573	96.6179
96.1857	96.5284
64.2543	64.2352
13.2314	12.2631
10.9771	10.1022
88.8962	92.0452
93.8354	92.3974
94.4211	94.1389
94.381	93.8215
73.9507	73.1719
94.8746	93.7688
94.6707	93.0165
94.1477	94.2406
93.515	94.1654
91.8552	92.1316
93.0822	92.2108
91.935	91.4751
88.3328	89.9468
79.818	81.9471
79.9895	80.2718
81.2957	80.8136
80.959	81.6933
83.2478	84.7666
94.5962	94.0966
94.898	93.222
93.2993	93.5381
96.181	96.0399
95.5017	94.5522
89.3401	91.1182
94.3297	93.7892
92.0377	92.5332
93.9281	93.693
90.8103	92.9995
96.1099	96.5685
90.5844	89.0655
97.2732	96.2712
78.8096	76.1929
92.3741	91.9111
96.9657	95.8031
96.5988	96.4136
96.4544	96.2317
98.7395	97.955
96.2426	96.8572
97.0861	97.3123
96.0863	96.3906
86.6044	88.7372
82.6709	82.3283
97.6507	97.91
97.3056	97.2025
97.0812	97.3714
97.1784	97.2042
95.9109	96.3269
97.4841	97.6507
84.5505	85.3898
97.4602	97.1691
97.1167	97.4245
97.2435	97.9417
95.935	96.2831
92.3105	92.1675
95.0369	94.911
95.0065	95.4002
94.1646	94.8988
94.231	94.2443
96.1153	95.9736
95.5625	95.7121
96.9339	96.5267
97.2079	97.0588
97.5605	97.5633
98.0613	97.855
93.9891	95.4608
96.8704	96.6175
95.6818	97.1631
95.9928	95.7283
97.12	97.4343
97.3156	96.9605
96.8794	96.9563
96.5004	96.042
97.9416	97.3748
96.7266	96.9129
97.4571	97.5515
96.8395	97.705
96.2892	96.0212
96.1264	96.3339
98.9494	98.5741
97.8586	97.8121
95.0593	95.1367
95.7706	96.1145
96.5886	96.076
97.0775	97.3675
96.0173	96.5642
95.6567	96.1053
95.5635	95.6983
95.4106	95.555
96.7676	97.2551
96.807	96.7242
96.875	96.6432
92.605	94.7813
98.5294	98.609
92.2821	93.6399
95.7303	97.6757
97.865	97.65
97.7677	97.7432
97.7778	97.6388
98.3264	98.2675
97.832	97.7456
97.8343	97.5835
97.4566	97.5613
96.5882	97.1804
96.2535	96.0806
98.5825	98.3659
98.5416	98.6352
97.97	97.8963
95.8277	95.4953
90.0983	91.6959
91.8472	91.3627
91.4054	91.7253
96.2147	96.1125
95.9285	95.9902
97.352	97.4664
97.6466	97.6431
97.1558	97.2289
96.571	96.662
95.6792	94.6366
96.513	96.8447
96.1655	96.7205
96.0911	96.8201
95.0296	95.2562
90.1423	90.4303
96.6942	97.1034
95.933	96.1462
97.2838	97.4308
97.0667	97.4482
95.3676	95.1501
97.547	97.5145
97.991	98.2058
98.4731	98.2026
98.7577	98.8607
96.2339	96.9489
96.2739	95.9272
96.7812	97.0856
97.8632	98.3571
97.3262	97.4888
95.1629	95.4527
94.3848	94.1138
97.603	97.7786
95.5926	95.8647
97.6923	98.2022
98.4819	97.5823
97.0525	96.2287
97.6199	97.9101
90.5375	85.8579
93.9163	93.9895
96.5222	97.1167
96.81	96.863
97.208	97.7243
94.8742	94.6516
95.8155	96.598
96.8257	97.1618
96.9757	97.4674
89.9582	90.6939
96.3003	96.8492
97.4056	97.0968
96.8498	96.8029
96.8901	97.221
96.4421	96.6704
7.86878	6.82902
6.33047	4.97712
92.0307	92.626
93.7144	92.6974
94.3021	93.4998
92.5122	91.8414
72.9839	73.8927
93.1748	92.3505
92.4629	92.4287
93.9103	94.1809
91.8757	92.0469
90.191	90.715
91.6105	91.3416
88.4653	87.7572
84.8675	86.7473
82.1072	82.5256
80.0853	81.0405
80.7696	81.2297
80.6698	81.7935
82.8146	82.7792
91.8564	93.3063
93.1464	90.0686
92.4809	94.1867
95.4068	96.1616
94.391	95.8855
92.2747	92.587
93.6151	94.7004
93.0496	93.7068
94.4005	94.6949
97.8894	97.7675
97.4752	97.2766
80.1622	81.1562
94.129	93.3169
95.523	95.3322
95.9064	95.0622
96.6281	97.4334
98.6336	97.9167
96.8087	97.2414
96.3158	96.9072
89.748	89.7642
79.6688	78.9879
98.0688	98.3909
97.4169	97.8259
97.2873	97.4046
97.6696	97.4711
97.1584	97.098
97.6681	97.8396
84.303	85.0658
97.5582	97.5571
97.4825	98.0213
98.1492	98.5213
97.0495	96.9776

## Sheet: Fig2S7C
RPM_diff
-27.3478
-2.7515
-41.4015
-39.0687
-12.7849
-8.55393
0.751581
-26.8485
-5.14415
-22.7578
47.0951
-28.8276
1.13686
-19.8415
-37.3451
-28.3115
-6.55889
0.173155
-14.5793
-9.80092
-6.88984
-11.9105
-20.33
-3.14001
14.4827
-6.17597
34.2439
38.0652
32.471
-5.31982
3.58328
15.1474
-3.39081
19.1499
28.4353
-66.6956
-98.8427
31.2956
76.7326
-106.322
-91.8305
29.0521
-122.306
-104.529
-151.264
-29.2604
-14.4626
-26.1849
10.1064
43.945
-31.3053
-12.3381
-2.68238
13.0433
-18.3085
-23.8685
-15.6092
5.81622
-9.15602
0.655076
-6.19735
-0.569228
23.6724
-7.47983
-6.44868
-10.1071
-3.65905
-2.53917
-19.5411
-39.264
52.9667
-146.441
-8.57541
-129.389
23.2072
30.4063
22.3494
11.9675
-11.0576
-3.27788
-1.77215
-6.05357
16.2185
3.0056
31.0391
36.7892
26.2778
2.85925
-0.00753533
2.88468
8.77088
21.1451
-14.5544
-4.62315
12.7877
35.7587
32.9505
29.9442
4.22117
11.6148
5.67442
19.5535
-28.7083
-50.6715
0.521101
42.7543
-50.9421
-132.144
35.8107
47.4635
2.57045
22.3103
-19.4135
-9.0333
49.3943
138.413
-176.5
38.6452
15.6187
60.3698
25.9354
26.9386
70.1097
37.7451
83.1889
117.515
-177.9
70.8463
26.8118
-154.997
-167.295
-1.77067
-2.73904
-68.5576
-42.4886
-40.5773
4.00029
51.2211
19.2642
3.37507
-23.0128
11.2807
25.5076
7.46517
27.2761
26.7729
31.6894
-26.1649
-38.6445
-13.6661
-13.0881
26.6424
9.56361
-12.6202
0.783477
-14.1605
-9.60085
-28.4257
-4.50602
-38.1385
-30.2618
-6.21472
-40.302
-17.7039
-8.61615
9.39712
-24.4965
-8.11205
-24.4452
54.0197
-28.0462
6.72754
-22.4029
-34.2973
-31.6528
0.191351
4.1977
-11.7813
-10.3852
-8.70944
-14.3444
-21.295
-4.39632
14.2433
-4.20033
30.2619
34.7839
23.9994
33.8109
-3.40766
3.33309
26.3209
-4.20014
25.9071
31.1775
-58.9915
-77.6148
40.6615
-142.73
75.4575
-120.877
-95.6009
26.9572
-99.3815
-155.404
-28.7534
-9.3327
-20.4498
18.2252
46.0326
-27.2578
-0.979966
-3.52176
13.6756
-12.6936
-18.9013
-13.759
11.1592
-11.6054
2.6123
-6.93226
-3.80693
24.7555
-0.397693
-8.35904
-7.97816
-3.46201
-0.411061
-26.0518
46.0893
-136.135
-3.14796
-123.548
27.4778
34.6979
28.9876
12.302
-5.77626
3.88865
3.3514
-7.3432
13.7312
3.82352
34.0477
43.0221
22.568
2.89987
6.60383
10.5762
2.235
22.8031
-7.89185
-4.60579
-4.88494
18.2099
45.8944
33.7939
30.9659
6.9714
13.6876
4.68451
14.7399
-29.91
-44.363
4.85783
40.7676
-45.8705
-128.356
41.9455
58.6147
-0.59283
24.6444
-12.2446
-9.83059
51.5752
142.407
-164.342
43.4895
16.9704
64.1884
28.3432
26.3713
70.0762
39.7557
79.4094
116.329
-160.057
74.4614
28.6337
-138.936
-154.12
-14.2132
-3.48572
-61.4232
18.275
-41.0338
-31.0493
-40.687
14.9789
50.5899
13.9788
4.61463
-15.5297
18.5095
-97.6473
18.5165
-93.7778
6.13537
34.6556
38.2805
34.9937
-23.7697
-41.2404
-19.012
-12.2137
-5.59797
30.318
8.05871
-13.2753
-4.14878
-9.82309
-8.21201
-30.0076
-1.03375
-46.2056
-40.069
-10.8773
-7.51156
1.18676
-30.6378
-8.54693
-34.3725
46.2041
-31.3196
3.80831
-23.2327
-36.9141
-29.1605
-4.03811
2.38686
-11.4597
-7.36099
-8.65425
-10.6309
-12.8635
7.18929
14.4646
-2.21902
30.0445
33.7494
32.5262
-5.92427
3.53234
19.0175
-6.56235
19.1549
32.5516
-69.8822
-99.0073
35.2779
-105.536
-93.0342
29.3918
-98.7351
-149.171
-25.5588
-10.8389
-20.9411
17.1652
51.9466
-31.2871
-4.06396
-0.141094
9.24352
-15.3914
-24.1339
-12.7868
5.85536
-8.04203
4.26925
-3.99143
1.71811
29.0308
-1.54146
-4.53026
-10.0147
-5.27223
1.45422
-42.1884
51.6697
-150.485
-7.82155
-131.85
24.2699
25.389
26.222
12.5413
-10.2403
1.79246
5.80271
-10.8111
16.811
-0.00729039
35.7491
37.4411
24.7205
8.33859
4.7965
4.50365
4.51035
20.7272
-10.6001
-6.43509
-11.3078
14.0413
35.6884
34.318
31.5032
5.99762
9.62867
6.94093
18.8907
-28.259
-49.7307
10.8003
42.2594
-64.7632
-133.479
37.8769
51.9098
-7.17571
21.6414
-16.768
-9.15575
50.0947
136.826
-173.049
42.7221
18.4724
63.58
22.8502
27.0111
70.0933
41.3316
74.9225
115.435
-172.294
69.2373
28.3678
-152.542
-170.571
-5.77762
1.56642
-76.0242
-44.9851
-38.2878
6.29917
48.3517
15.721
3.54405
-24.9765
15.8921
25.2364
6.15031
30.1768
27.2452
36.7867
-22.4078
-36.5481
-9.83152
-14.1137
-12.7509
29.0214
5.47011
-7.12653
-4.93936
-16.9066
-6.55679
-22.6863
1.1629
-30.6626
-37.2442
-11.3264
-26.8552
-24.6032
-7.86735
4.34649
-24.4807
-5.87414
-20.4258
46.2542
-21.0372
4.97518
-20.3436
-32.5288
-27.2919
1.99955
3.78535
-9.62629
-8.70591
-10.6777
-9.02113
-15.6772
-6.06053
17.3048
0.58798
32.7095
34.4034
27.8253
36.3419
-2.55523
5.9072
27.7384
0.141556
21.7935
28.8969
-55.7482
-73.9471
32.2062
-133.475
72.9553
-109.647
-89.133
27.4583
-97.063
-143.563
-28.0264
-8.16618
-22.2848
13.871
46.9323
-24.1284
5.08633
-5.7709
10.9399
-13.2152
-17.4402
-16.8125
6.92926
-17.5438
-2.15183
-6.86597
-7.80942
26.9209
-6.25445
-9.47357
-14.8307
-11.968
-1.55306
54.1121
-136.84
-2.48571
-122.145
21.095
29.15
22.4968
8.39244
-6.62951
1.68372
0.516664
-9.46439
17.5889
-2.30083
30.0977
36.7745
24.7886
10.9258
-0.383562
3.62531
2.46306
29.9558
-12.4609
-4.52867
-5.46979
8.74145
45.38
33.0304
27.0179
3.56392
9.14523
3.17184
16.3463
-29.3095
-45.1549
10.3493
40.917
-43.6938
-127.64
46.6219
65.5602
1.35748
25.5889
-6.4171
-11.8927
54.0006
137.594
-166.756
43.9306
8.39403
65.7022
26.9922
26.6182
63.3093
34.8278
83.2824
113.28
-168.889
67.203
31.3685
-133.384
-155.625
-5.30186
2.88244
-61.5647
17.6788
-45.6771
-31.9282
-41.1107
9.75753
51.9011
18.5083
3.45905
-16.455
23.9269
-95.3081
15.4298
-80.26
3.00661
40.0637
13.0083
34.2026
-21.7583
-38.4666
-7.17516
-9.72047
27.2845
3.0161
-8.12164
-3.68577
-12.3056
-8.33598
-24.8178
-1.35374
-35.7868
-32.9917
-12.4737
-8.52392
-1.32954
-25.0041
-12.3588
-24.8802
47.8716
-29.976
0.958816
-18.4808
-36.9465
-29.2349
-5.45838
4.31461
-10.7911
-9.08761
-5.45206
-7.75302
-17.7819
-3.02455
6.60684
-3.74793
32.392
31.5606
31.2558
-3.50247
4.24347
27.8039
-5.70708
16.7021
35.6924
-73.5863
-93.4784
31.7653
75.6402
-107.313
-87.805
27.7788
-98.6626
-149.839
-30.8581
-19.4607
-26.7307
17.3398
54.7164
-32.6804
-6.58566
-3.77739
8.34594
-16.9461
-17.0599
-14.5139
3.47344
-10.4438
4.87517
-5.04396
-2.47382
30.8182
-4.58451
-8.91456
-10.1901
-3.38475
-3.06606
-20.3702
-29.113
52.3747
-145.488
-7.16906
-126.945
23.5476
27.0152
27.3106
8.29474
-5.27105
-1.27511
0.151464
-9.01937
17.0671
1.06518
33.3587
38.2546
31.2087
7.93619
6.26816
4.79447
6.69027
20.7827
-10.4067
-6.04144
-1.07872
16.9081
38.3539
29.9575
27.4925
2.83273
13.2706
16.7763
17.4347
-31.1987
-45.7122
7.20396
43.0822
-51.0845
-131.81
38.8306
47.4434
5.32958
24.0404
-18.9365
-10.3945
47.1771
140.693
-172.142
42.6614
14.7092
65.9582
29.0564
29.0041
72.4151
39.1415
87.8224
118.071
-165.749
73.4181
29.7499
-153.796
-166.703
-12.2261
-0.975565
-71.7127
-40.8425
-36.8533
8.38308
50.0067
11.7103
5.82797
-24.32
14.7959
20.4989
7.39626
32.8531
28.3329
-24.5739
-36.1164
-14.9808
-7.46889
31.9294
6.20078
-7.13822
-9.66879
-14.1533
-7.756
-25.4978
5.07164
-40.8095
-34.3316
2.05384
-38.0161
-13.7566
-7.84366
10.2405
-20.1455
-8.37066
-21.8697
51.9913
-23.9869
13.0478
-14.6592
-31.0164
-24.4815
2.06363
4.43595
-10.2552
-7.36423
-11.2072
-10.8018
-15.3888
-0.260267
20.3708
1.47306
33.5852
33.0615
30.6104
35.5443
-3.02259
4.14526
26.7189
0.316793
26.2785
27.5372
-53.5452
-78.6301
44.1038
-147.416
78.6013
-105.627
-93.5258
26.7361
-135.394
-97.173
-145.903
-27.7777
-9.8541
-19.3158
15.6607
44.7681
-27.86
-5.6431
-4.0311
10.7615
-12.9893
-20.8881
-15.179
12.6014
-16.8375
6.37665
-6.3883
-4.92938
24.7443
-4.35457
-6.52368
-7.8347
-7.52607
4.05994
-31.7921
66.9209
-137.094
-3.46606
-125.484
24.6258
29.2116
27.2049
13.5001
-8.75585
-6.36429
2.19416
-10.4611
16.9358
-1.4971
33.9352
39.0722
27.309
9.07172
8.09639
11.0378
5.44837
22.189
-9.55485
-4.6074
-3.40306
23.3613
42.6151
34.322
33.5424
5.64395
13.1487
7.86868
21.0088
-28.3475
-40.4814
7.30758
35.3454
-47.2766
-129.389
43.6646
57.884
1.76534
22.5912
-11.4149
-9.26741
53.2984
134.873
-163.285
37.0398
14.3309
63.4969
30.3143
28.8404
70.6609
37.5753
76.5072
107.815
-161.813
64.7815
28.3768
-137.084
-159.991
-7.529
7.32758
-65.8647
24.6702
-43.8149
-29.302
-33.5578
15.7419
52.0881
16.1142
-0.220629
-11.4008
22.7195
19.3901
-83.9039
8.19972
35.9954
23.5079
34.1012
-23.9043
-38.0679
-13.053
-5.32787
30.6598
9.9279
-7.19673
-6.42944
-11.3291
-8.4102
-32.2991
1.45551
-41.8284
-41.2535
-15.9294
-36.1385
-12.0549
2.92643
-28.3817
-4.81283
-20.3491
43.4578
-27.935
3.3311
-21.6708
-39.776
-28.8581
2.19007
5.82696
-12.2242
-6.49017
-7.02127
-11.3966
-17.6914
-12.0584
15.4778
1.30212
31.0425
31.2962
37.4907
-3.68331
0.166617
24.1441
-5.98161
23.8632
37.9454
-70.1501
-92.2745
33.4193
-135.56
73.8019
-109.849
-86.4692
32.1882
-120.314
-104.843
-148.177
-29.8115
-12.0583
-26.4571
10.2315
42.4721
-30.0833
-14.5489
-0.549105
15.5375
-14.3363
-17.855
-14.2141
9.15343
-18.6158
-0.667029
-6.72138
-5.21136
23.9483
-3.89933
-10.2629
-15.8885
-4.19745
-3.69127
-14.1452
-30.0717
55.8575
-145.343
-0.515868
-125.202
22.9492
33.601
27.2969
8.17544
-9.56354
3.82419
2.14277
-8.02379
14.5597
3.28802
32.1737
42.7924
21.5302
5.45323
8.1809
2.48399
6.67492
28.404
-9.66946
-3.56839
-9.44348
11.0401
39.0773
27.4517
23.8381
5.30509
13.4534
7.68059
17.4
-36.6534
-46.9108
36.935
-41.0131
-130.751
42.7068
58.5139
2.58623
26.0905
-13.8056
-7.70351
54.3849
137.63
-159.337
31.9181
18.9989
64.7587
23.3559
27.5727
68.3972
43.1573
85.9598
113.03
-151.594
59.5167
34.1427
-153.978
-171.062
-6.54133
-3.05592
-59.398
-45.1117
-37.6176
5.93773
45.3318
18.1227
10.2234
-14.0161
26.1004
15.4431
12.2031
33.0712
35.0103
37.0289
-19.4414
-34.7978
-8.30549
-4.04461
29.4847
5.57438
-2.37147
-2.30018
-8.25304
-6.8503

## Sheet: Fig2S7D
charge_diff
0.0533567
0.152291
0.106925
-0.509262
-0.331976
-0.0251951
0.30809
0.0573931
-0.50639
0.170595
-0.613553
-0.537467
-1.08378
0.204062
-0.635495
-0.168055
0.0971353
0.0277422
-0.457339
0.0497733
-0.78808
0.290096
-0.171462
-0.0705832
0.0382826
-0.7382
-0.683819
-0.0993567
-0.407501
0.0427406
-0.0776543
-0.571185
-0.446619
-0.438049
-0.492717
0.43869
0.35899
-1.33908
-2.13277
0.270043
-0.298269
0.00627945
0.0923295
0.647114
-0.638553
-0.288308
-0.623722
-0.178066
-0.366248
-0.265936
-0.287447
-0.0769686
-0.179661
0.123401
-1.16143
-0.262193
1.3514
0.403457
0.547433
-0.0392564
-0.121988
-0.232734
0.305877
-0.701831
-0.561626
-0.033116
-0.062264
-0.231634
0.557705
0.0240298
0.378997
-0.524461
-0.073862
0.361554
0.159662
-0.187869
0.153141
-0.73284
0.224621
-0.131828
0.467
-0.16359
-0.326937
0.0674767
-0.0630297
-0.814018
-0.51288
-0.762852
0.661241
-0.0469707
0.0546419
1.4527
-0.624153
-0.447542
-1.30141
0.0596351
-0.230546
0.603017
0.190828
-0.459223
0.229952
-0.221782
-0.277596
-1.25595
-0.524191
0.0733147
-0.206745
-0.593562
0.10306
0.557821
0.359172
-0.932147
-0.750672
0.483566
0.460933
-0.815689
2.28814
-0.119349
1.97847
-1.82612
0.710664
-1.16346
0.336903
-2.99991
-2.088
-1.31878
1.87748
-0.367821
0.15356
-0.0959538
1.61416
0.146994
-0.0683169
0.340249
-0.59194
-0.209432
0.0963569
0.0225649
0.150946
0.189107
0.270845
0.332446
0.123271
-0.154415
-0.327667
-1.18238
0.159375
-0.516406
-0.516542
-0.375664
-0.224633
0.0734821
-0.337578
-0.398755
0.198203
0.240029
-0.313687
-0.023501
0.0262943
0.0651078
-0.970059
-0.707806
-1.25928
-0.318154
0.501419
1.21958
-0.257219
0.388675
0.0287356
-1.01463
-0.22189
0.0768708
0.415076
-0.34562
-0.0511747
0.210196
-0.0036276
0.497434
-0.308135
0.122501
-0.268382
-1.41551
-0.616773
0.282195
0.131731
-0.0956557
-0.271575
-0.761957
0.559796
-0.197765
0.248054
-0.542097
-0.0289366
0.354164
0.537946
-1.05368
0.0482367
-1.1492
0.49505
-2.00748
-0.0705961
-0.148125
0.470477
0.465195
0.535164
0.231297
-0.441405
0.744476
-0.82119
0.120631
0.239725
-0.13933
0.179756
-0.672406
-0.0159111
-1.04524
0.175059
0.569055
-0.0806001
-0.426568
-0.330943
-0.164695
-0.0533115
0.63469
-0.016278
-0.38949
-0.899758
-0.597371
-0.144792
1.00741
-0.01148
-1.09811
-0.256055
-0.268844
-0.0851646
-0.0555041
-0.667695
-0.23501
0.702518
0.160304
-0.0313631
-0.794659
-1.03261
0.41467
-0.918948
-0.615827
0.0410378
-0.246538
-0.376682
-2.42396
0.929998
-0.397796
-0.130891
0.55586
-0.283315
0.180016
-0.429126
0.086096
-0.598199
0.217985
-0.612809
-0.274067
-0.422551
-0.380695
-0.851012
0.327565
0.589365
-2.94902
0.650222
-0.428787
-0.25021
-0.388891
0.417443
-0.111881
0.215979
-0.385206
1.32853
0.244849
0.646846
-0.473328
-4.48774
0.399805
-0.533306
-0.0458499
-0.719695
-0.390727
0.715321
-0.376616
0.699806
-1.02071
-1.33158
0.16847
-0.521993
1.16772
-1.10394
-0.331064
1.03854
0.100812
0.279718
-0.770047
0.345956
-0.0348623
0.990814
-0.790301
-1.06524
-0.0678745
0.76198
-0.248661
0.549988
-0.767018
-0.111791
0.303577
-0.349275
1.04226
-0.0927245
0.262129
0.346297
0.673212
-0.939056
0.787936
-0.40977
-0.226791
-0.608514
-0.663588
-0.584515
0.678662
0.523169
-0.138402
0.00676304
0.0399507
-0.657741
-0.717331
-1.08183
-0.5509
-0.712637
-0.0370104
-0.491016
-1.10946
-0.109719
0.299422
0.146652
-0.139101
0.486118
-0.11537
-1.17123
-0.38115
-0.41299
-0.854288
-0.18211
-0.596973
-0.0842433
-0.297237
0.227335
-1.1792
0.529148
-0.0833304
-0.769283
-1.50344
-0.316444
-1.35811
-0.00559618
-0.396807
-0.0232344
0.32941
-0.162159
0.0150204
-0.268191
0.0313519
-0.10119
0.133537
0.0321909
-0.858059
-0.0342793
-1.55281
-1.0442
-1.57542
0.652752
0.519447
-0.148946
-0.14515
-0.197375
-0.251778
-0.296752
-0.148272
-0.133504
-0.510542
0.318916
0.378079
-0.833493
-0.199394
1.32589
-1.00264
-1.30766
-0.26159
-0.0294847
-0.731306
-0.524488
-0.566691
-0.369737
0.680092
-0.372427
-0.337755
0.19803
-0.425775
-0.165999
0.25331
-0.465599
-0.468705
-0.610091
-0.211443
0.964559
-0.303848
-0.600206
-0.148357
0.595124
0.152407
-0.411305
-0.0722837
0.730883
-0.302699
-0.75704
-0.318951
0.551146
-0.109377
1.79952
0.478765
-1.14729
-1.29847
0.363492
1.02665
1.42261
0.459916
-0.187293
1.95785
0.869629
-1.08176
0.242419
2.2594
0.571854
-0.966191
1.22656
-0.855008
0.169031
-0.807489
-2.64431
-2.49055
-0.172721
-1.34999
0.903918
-1.38546
2.3945
0.702336
0.269367
0.0730744
0.261476
-0.566429
0.441221
0.64181
0.546081
-0.0387935
-0.382673
0.838653
-0.142188
0.112257
0.693936
2.48183
-0.720061
0.416523
0.163583
2.17219
-0.152194
0.18422
-0.0781071
0.303587
0.259734
-1.01762
-0.526032
-0.0545547
0.589937
-0.200033
0.373561
-0.619082
-0.493281
-0.185126
-1.68836
0.0726513
-0.399901
-0.155164
-0.432007
-0.313037
-0.0146179
-0.359433
0.469621
-0.564549
-0.418129
-0.140485
0.265146
0.257158
0.375093
-0.349907
0.102455
-0.270093
-0.24166
-0.17417
-0.110569
-0.304237
-0.384378
-0.239759
-0.360413
0.327808
0.151238
-0.40817
-1.37395
0.186592
0.143287
1.49935
-0.576746
-0.0612691
-0.270677
0.338699
-0.630512
0.489834
-0.313042
0.142215
-0.101763
0.333309
0.208644
-0.298516
0.536319
0.837883
0.614028
0.191647
-0.0276589
0.257365
-1.57063
-0.00787211
-1.52707
-1.90038
-0.0664955
-0.222584
0.17763
-0.249708
-0.287259
-0.92629
0.0120902
0.0179658
0.342604
-1.53003
-0.620642
1.14042
-0.236713
-0.728158
-0.235053
-0.698871
0.69507
0.119006
0.480006
-0.169112
-0.370639
0.646036
0.2232
-0.686918
-0.697304
-0.695605
0.17468
0.197704
0.058741
-0.139393
0.0119179
0.223035
0.473809
-0.185596
-0.377089
-0.0723035
-0.415457
-0.773942
-0.0139065
-0.122329
-0.570912
0.145218
0.0132979
-0.0851511
-0.334791
-0.580216
1.05942
0.31964
0.0487765
-3.43606
0.628054
-0.304891
2.16409
-0.616609
2.10784
0.645475
-0.224521
-0.477679
-1.62839
1.70312
1.12897
-0.524418
-3.06864
-0.776137
-0.11402
0.156145
-2.10891
-1.10601
3.06918
-1.19131
0.568768
0.544369
-0.177302
-1.86989
1.05844
-0.356748
-0.888704
0.221705
0.235014
-0.879809
0.758596
1.15116
-0.28639
0.534932
-0.245096
-0.885945
0.313105
0.0501562
0.690367
-0.282549
-0.0734221
0.598313
2.53376
0.211284
-0.137833
-0.206661
-0.497141
0.0989368
0.244166
0.148194
-0.436964
-0.0983837
-0.300927
0.182135
-0.277483
0.290829
-0.876382
-0.486707
0.211772
0.136633
-0.264167
-0.101327
0.0177018
-0.318557
-0.749369
0.466367
0.281532
-0.0288571
0.131154
-0.0725304
0.551459
-0.0594464
-0.164841
-0.67092
-0.362095
-0.489452
-0.90618
0.142641
-0.389445
-0.461535
-0.0141154
-0.544683
-0.13733
-0.189202
0.388625
-0.203197
-0.186669
1.18829
0.074133
0.248492
-0.189875
1.8218
1.7817
-0.312465
0.320602
1.31299
1.58433
0.0826823
0.0234182
0.29514
-0.174658
0.109198
0.221035
0.221074
-0.263956
0.444944
0.363945
-0.122596
-0.0674345
0.470066
-0.790471
0.080099
-0.353657
-0.163439
-0.0763872
0.180891
-0.108941
0.450538
-0.171676
-0.685623
0.207279
0.179989
-0.252248
0.0435152
0.186164
-1.00926
0.153676
0.0379773
-0.368274
-0.776519
0.162536
0.417254
0.147848
-0.497431
-0.561186
-0.216965
-0.0489066
-0.364898
-0.256405
-0.280758
-0.589159
-0.00912187
-1.94846
0.389629
0.127332
-0.276906
-0.41995
-0.834552
-0.780144
-0.213346
0.0752661
-0.743891
-0.0127914
-0.055744
-0.450403
-0.0410704
0.279817
-2.75131
0.241458
1.15335
-1.24612
0.885715
-0.278091
1.21162
-0.18975
-1.12052
-0.0118607
-0.0425972
0.0406467
-1.2591
1.31988
0.701034
-2.10639
-0.686008
1.51943
-0.862098
1.7444
0.133094
-0.0879406
1.09015
-1.7701
0.115738
-0.284051
-1.55169
-0.885118
-0.395795
1.69304
-0.411935
-0.054895
2.30928
-0.00423697
-0.783189
0.500507
-0.0931217
0.205639
-0.178268
-0.869143
1.14968
0.0142581
-0.178076
0.589895
-0.0129874
-0.233811
-0.491488
0.820871
-0.308199
-0.719142
0.0539866
-0.231157
-3.23704
-0.110612
-0.309441
-0.413366
-0.686616
-0.962148
-3.41707
-0.856645
-0.417242
-0.145608
0.345342
-0.39091
-1.18915
-0.252699
-0.118008
0.11351
0.0423295
0.276176
-0.0240632
0.830565
-0.0925614
0.183864
-0.244301
0.250831
-0.731825
0.469285
-0.273707
-0.643782
-1.03858
-0.07174
-0.499951
-0.489813
-0.304062
0.32564
0.87391
-0.580013
-0.274772
0.454494
1.06092
-0.101243
-1.37972
0.679966
-0.87988
2.09108
1.09699
-0.551454
-0.100678
-0.252321
0.131683
0.393322
-0.174198
0.0433205
-1.18973
-0.0164784
-0.357559
-0.3551
-0.0797722
-0.506217
-0.57392
0.57381
-1.25752
-0.968265
-0.056213
-0.269688
-0.353236
-0.0712097
0.296715
-0.100027
0.253508
-0.386035
-1.34469
-0.131497
-1.39334
-0.216292
-0.372085
-0.226235
-0.422477
-0.0461417
0.447655
-0.217487
0.556815
-0.209446
-0.934274
-0.408018
-0.0565573
-0.630893
-0.0918109
-0.0815129
-0.645137
0.522607
-1.22314
1.27499
0.739153
-0.852394
1.61102
-0.255237
0.022477
0.0506265
-0.436352
-0.463788
-0.0837477
0.080345
0.826516
-0.923955
-0.116536
-0.137836
-0.460533
-0.34266
0.0190886
0.968285
0.874856
-3.14899
1.43801
0.282197
0.559442
0.778769
1.10582
1.65419
-0.0928665
-0.650376
-0.276399
0.871371
0.459893
-1.61403
-2.1291
-0.28237
0.482171
-0.734311
-1.51881
0.499572
1.67596
-0.238763
0.141106
0.949529
-1.77811
0.54044
-0.495561
0.235083
-2.18921
-0.458635
1.51894
1.00205
2.61678
0.462983
1.16261
0.185224
0.222777
0.784486
-0.614616
-0.226194
-0.304302
-2.13284
0.342598
-0.259304
0.103093
-0.29021
-0.0258142
-0.416079
-0.16663
-0.839271
0.291077
-0.307746
-0.698229
-0.348072
0.142971
0.125896
-0.393709
-0.734209
-0.0133297
0.141643
-0.149657
0.407163
0.14906
-0.0027766
0.206262
-1.47177
0.252898
-1.4813
0.264545
-0.314295
0.355094
-0.0769146
0.458356
0.566799
-0.186327
-0.0943953
-0.865503
0.268084
-0.20748
0.375356
0.046457
-0.0773384
-0.343922
0.512619
-0.290013
-0.546856
-0.448593
-0.134832
-0.144324
-0.487573
0.082726
0.231785
-2.17627
-0.0795527
-1.35786
-1.94534
0.215075
0.0244429
0.138978
0.0588439
0.0864067
0.250805
-0.104656
-0.592214
0.172901
0.216577
-0.0935946
0.0736949
0.332437
-1.59765
0.484447
-0.319885
0.102196
-0.0616978
-0.114454
0.00353299
-0.0731146
-0.0909888
1.04263
-0.331682
-0.554957
-0.728997
-0.226581
-0.287992
-0.409143
-0.213165
-0.147056
-0.381534
0.217546
0.0325294
-0.214845
0.270496
-0.103056
-0.714966
0.3467
-0.304401
-0.493817
-0.162586
-0.289784
0.27098
-0.175577
-0.272105
-0.509939
0.899555
0.82375
-0.290123
4.67956
-0.0731972
-0.594468
-0.0529328
-0.516312
0.22258
-0.78258
-0.336077
-0.491748
-0.735719
-0.54884
0.308779
0.0468635
-0.330883
-0.228375
1.03975
1.35336
-0.595377
1.01702
0.80222
0.670887
-0.908851
0.824281
0.0342777
-0.270642
-0.171146
-0.524057
0.268892
0.708172
-1.8798
-0.418365
-0.955206
-0.46013
-1.12372
0.0353672
-1.4499
3.07779
-1.70575
-0.754865
-1.49443
-0.312311
-1.08531
-0.657116
-0.29436
0.121912
0.198652
-0.994002
0.812068
0.190819
0.844224
-0.805284
0.71698
-0.432713
-0.591427
-0.0162037
0.680914
-0.322165
-0.408985
-0.117326
0.198538
0.0603858
-0.17149
-0.762775
0.00112367
-0.538736
-0.372164
0.0719226
