# Supplementary material for: A robust method for measuring aminoacylation through tRNA-Seq
Source: eLife. 2024 Jul 30;12:RP91554. doi: 10.7554/eLife.91554 (PMC11288633; doi:10.7554/eLife.91554)
Supplement: Figure 2—figure supplement 8—source data 1. [file elife-91554-fig2-figsupp8-data1.xlsx]

## Sheet: Fig2S8A
barcode	charge
l5Sp	1.29683
l6Sp	0.917431
l8Sp	0.686813
l9Sp	1.04012
l3Sp	0.880282
l2Sp	1.45719
l4Sp	0.809061
l7Sp	0
l8Sp	0
l5Sp	0.716846
l9Sp	0.173611
l6Sp	0.174825
l7Sp	0.515464
l8Sp	0
l9Sp	0.533808
l1Sp	0
l4Sp	0.571429
l6Sp	0.350877
l2Sp	0.335008
l7Sp	0.66778
l8Sp	0.173611
l9Sp	0.374532
l6Sp	0.831947
l1Sp	1.03986
l2Sp	1.87713
l3Sp	1.92644
l7Sp	1.57068
l8Sp	1.08893
l9Sp	1.16667
l3Sp	0.464396
l1Sp	0.784929
l4Sp	0.771605
l7Sp	0.706714
l8Sp	0.654664
l5Sp	1.26939
l9Sp	1.21107
l1Sp	0.543478
l3Sp	0.737463
l4Sp	0
l2Sp	0.544959
l5Sp	0.642055
l6Sp	0.481541
l7Sp	0.511945
l6Sp	0
l1Sp	0.408719
l2Sp	0.137552
l3Sp	0.435414
l4Sp	0.288184
l5Sp	0.145349
l3Sp	0.484848
l6Sp	0.765697
l4Sp	1.00125
l7Sp	0.455927
l8Sp	0.515464
l5Sp	0.115473
l9Sp	0.675676

## Sheet: Fig2S8B
barcode	charge
l3Sp	1.09709
l3Sp	1.51838
l3Sp	0.524934
l3Sp	0.818613
l3Sp	1.02836
l3Sp	0.665247
l3Sp	2.40486
l3Sp	1.23203
l3Sp	0.952973
l3Sp	0.983058
l3Sp	2.04819
l3Sp	0.832358
l3Sp	0.990826
l3Sp	1.56491
l3Sp	1.70235
l3Sp	0.652082
l3Sp	0.722772
l3Sp	0.61585
l3Sp	0.704568
l3Sp	0.533861
l3Sp	0.50883
l3Sp	0.66193
l3Sp	0.496995
l3Sp	0.58875
l3Sp	0.557541
l3Sp	0.59902
l3Sp	0.808159
l3Sp	0.377216
l3Sp	0.453649
l3Sp	0.484506
l3Sp	0.520437
l3Sp	0.606372
l3Sp	0.704809
l3Sp	0.536057
l3Sp	0.6241
l3Sp	0.416194
l3Sp	0.489324
l3Sp	0.775923
l3Sp	0.650724
l3Sp	0.540364
l3Sp	0.385564
l3Sp	0.575097
l3Sp	0.425532
l3Sp	0.503191
l3Sp	0.537244
l3Sp	0.682464
l3Sp	0.389827
l3Sp	0.381142
l3Sp	0.23353
l3Sp	0.385356
l3Sp	1.49634
l3Sp	0.896861
l3Sp	0.932294
l3Sp	1.04167
l3Sp	0.622031
l3Sp	0.631988
l3Sp	0.935065
l3Sp	0.814664
l3Sp	1.08982
l3Sp	0.697522
l3Sp	0.765697
l3Sp	0.553689
l3Sp	0.682927
l3Sp	0.567709
l3Sp	0.573477
l3Sp	0.60717
l3Sp	0.779684
l3Sp	0.966716
l3Sp	0.85947
l3Sp	1.06604
l3Sp	0.4163
l3Sp	0.964824
l3Sp	1.19787
l3Sp	0.89937
l3Sp	1.1769
l3Sp	1.01495
l3Sp	0.879865
l3Sp	0.563691
l3Sp	0.667009
l3Sp	0.634483
l3Sp	0.663979
l3Sp	0.573923
l3Sp	0.634771
l3Sp	0.458779
l3Sp	0.816168
l3Sp	0.290867
l3Sp	0.53135
l3Sp	0.494169
l3Sp	0.5638
l3Sp	0.838073
l3Sp	0.74813
l3Sp	0.591017
l3Sp	0.668382
l3Sp	0.801991
l3Sp	0.520918
l3Sp	0.679728
l3Sp	0.448219
l3Sp	0.593374
l3Sp	1.08281
l3Sp	0.521523
l3Sp	0.459258
l3Sp	0.396246
l3Sp	0.327976
l3Sp	0.388433
l3Sp	0.446724
l3Sp	0.660308
l3Sp	0.760397
l3Sp	0.52279
l3Sp	0.617103
l3Sp	0.279877
l3Sp	0.258732
l3Sp	0.369435
l3Sp	0.28481
l3Sp	0.639806
l3Sp	0.340252
l3Sp	0.916905
l3Sp	0.983417
l3Sp	0.662837
l3Sp	0.634876
l3Sp	0.471698
l3Sp	1.11432
l3Sp	0.786309
l3Sp	0.996016
l3Sp	0.869565
l3Sp	0.843759
l3Sp	0.676643
l3Sp	0.802365
l3Sp	0.75006
l3Sp	0.938967
l3Sp	1.24224
l3Sp	0.902834
l3Sp	0.970874
l3Sp	0.822004
l3Sp	0.892423
l3Sp	1.25698
l3Sp	0.525913
l2Sp	0.960854
l2Sp	1.47892
l2Sp	0.828864
l2Sp	1.02588
l2Sp	1.74176
l2Sp	1.1089
l2Sp	2.93775
l2Sp	1.18871
l2Sp	1.29117
l2Sp	1.0976
l2Sp	2.39044
l2Sp	0.853528
l2Sp	1.76268
l2Sp	2.4423
l2Sp	2.0039
l2Sp	1.18356
l2Sp	0.830962
l2Sp	0.911473
l2Sp	1.22699
l2Sp	1.33656
l2Sp	0.699545
l2Sp	1.07935
l2Sp	0.719255
l2Sp	1.23888
l2Sp	0.768728
l2Sp	1.29713
l2Sp	1.01649
l2Sp	1.11801
l2Sp	0.81716
l2Sp	0.658204
l2Sp	0.778265
l2Sp	0.728836
l2Sp	0.867267
l2Sp	0.732711
l2Sp	1.2788
l2Sp	0.873978
l2Sp	0.992235
l2Sp	0.976205
l2Sp	1.26703
l2Sp	1.11317
l2Sp	0.579846
l2Sp	0.703055
l2Sp	0.960019
l2Sp	1.25126
l2Sp	1.07697
l2Sp	0.777822
l2Sp	0.898588
l2Sp	0.451845
l2Sp	0.384517
l2Sp	0.294551
l2Sp	1.54384
l2Sp	1.1739
l2Sp	0.968642
l2Sp	1.30628
l2Sp	0.729993
l2Sp	0.937808
l2Sp	0.837258
l2Sp	0.846805
l2Sp	0.438276
l2Sp	1.07982
l2Sp	1.17196
l2Sp	0.840412
l2Sp	0.763359
l2Sp	0.762545
l2Sp	1.16987
l2Sp	1.45119
l2Sp	1.26202
l2Sp	0.990099
l2Sp	1.01112
l2Sp	0.99172
l2Sp	0.669678
l2Sp	1.26582
l2Sp	0.96694
l2Sp	1.27474
l2Sp	1.27173
l2Sp	1.5088
l2Sp	0.914185
l2Sp	0.794902
l2Sp	0.644122
l2Sp	0.565813
l2Sp	0.604303
l2Sp	1.13962
l2Sp	0.736249
l2Sp	0.901408
l2Sp	0.834327
l2Sp	0.745275
l2Sp	1.01695
l2Sp	0.767165
l2Sp	0.930632
l2Sp	0.919532
l2Sp	0.982582
l2Sp	0.593066
l2Sp	1.13656
l2Sp	0.624661
l2Sp	0.965447
l2Sp	0.844265
l2Sp	0.430875
l2Sp	1.16969
l2Sp	1.34972
l2Sp	0.369465
l2Sp	0.394276
l2Sp	0.368924
l2Sp	0.514706
l2Sp	0.359247
l2Sp	0.319489
l2Sp	1.0268
l2Sp	0.709954
l2Sp	0.512184
l2Sp	1.20915
l2Sp	1.17326
l2Sp	0.807103
l2Sp	0.549104
l2Sp	0.469484
l2Sp	0.987092
l2Sp	0.375427
l2Sp	0.737667
l2Sp	0.841716
l2Sp	1.4437
l2Sp	0.650868
l2Sp	1.02724
l2Sp	0.826918
l2Sp	0.896414
l2Sp	0.97629
l2Sp	0.76447
l2Sp	1.271
l2Sp	0.715308
l2Sp	1.21842
l2Sp	0.936409
l2Sp	1.23582
l2Sp	1.40704
l2Sp	1.02364
l2Sp	1.2502
l2Sp	1.10884
l2Sp	0.798403
l2Sp	0.930986
l2Sp	0.611127
l4Sp	0.613497
l4Sp	0.789074
l4Sp	1.49853
l4Sp	0.552764
l4Sp	0.907647
l4Sp	1.68612
l4Sp	0.470297
l4Sp	3.35518
l4Sp	1.0952
l4Sp	1.08511
l4Sp	0.783524
l4Sp	2.28928
l4Sp	0.535069
l4Sp	0.637704
l4Sp	1.90476
l4Sp	1.35723
l4Sp	0.742407
l4Sp	0.584969
l4Sp	0.9351
l4Sp	1.00028
l4Sp	0.791021
l4Sp	0.229095
l4Sp	0.551252
l4Sp	0.596878
l4Sp	0.589952
l4Sp	0.669942
l4Sp	0.802191
l4Sp	0.547599
l4Sp	0.630252
l4Sp	0.560506
l4Sp	0.413362
l4Sp	0.38743
l4Sp	0.673023
l4Sp	0.800821
l4Sp	0.572738
l4Sp	0.569018
l4Sp	0.42986
l4Sp	0.397382
l4Sp	0.801887
l4Sp	0.819423
l4Sp	0.485274
l4Sp	0.646621
l4Sp	0.469653
l4Sp	0.471812
l4Sp	0.446286
l4Sp	0.524525
l4Sp	0.383362
l4Sp	0.283447
l4Sp	0.426145
l4Sp	0.230835
l4Sp	0.410621
l4Sp	0.805987
l4Sp	0.863824
l4Sp	1.14655
l4Sp	1.52693
l4Sp	0.602674
l4Sp	0.351787
l4Sp	0.699301
l4Sp	0.626602
l4Sp	0.938804
l4Sp	0.689834
l4Sp	0.556444
l4Sp	0.524386
l4Sp	0.509179
l4Sp	0.588755
l4Sp	0.73415
l4Sp	0.594343
l4Sp	1.06152
l4Sp	0.927992
l4Sp	0.94744
l4Sp	1.13067
l4Sp	0.467651
l4Sp	1.06933
l4Sp	0.885268
l4Sp	1.20414
l4Sp	1.26888
l4Sp	0.777152
l4Sp	0.585774
l4Sp	0.614975
l4Sp	0.618716
l4Sp	0.60115
l4Sp	0.453309
l4Sp	0.634437
l4Sp	0.610855
l4Sp	0.553761
l4Sp	0.361736
l4Sp	0.604089
l4Sp	0.522149
l4Sp	0.434057
l4Sp	0.850667
l4Sp	0.663666
l4Sp	0.742312
l4Sp	0.731626
l4Sp	0.725937
l4Sp	0.740153
l4Sp	0.594302
l4Sp	0.53241
l4Sp	0.392947
l4Sp	0.685636
l4Sp	0.97198
l4Sp	1.01695
l4Sp	0.235312
l4Sp	0.259395
l4Sp	0.450028
l4Sp	0.188265
l4Sp	0.292928
l4Sp	0.247601
l4Sp	0.544606
l4Sp	0.661479
l4Sp	0.476569
l4Sp	0.535874
l4Sp	0.345369
l4Sp	0.389105
l4Sp	0.330073
l4Sp	0.428477
l4Sp	0.417402
l4Sp	0.403226
l4Sp	0.694444
l4Sp	0.645035
l4Sp	0.70159
l4Sp	0.625559
l4Sp	0.466527
l4Sp	0.698138
l4Sp	0.648228
l4Sp	0.605877
l4Sp	0.996678
l4Sp	0.997208
l4Sp	0.773646
l4Sp	1.05166
l4Sp	1.06778
l4Sp	1.09995
l4Sp	0.958964
l4Sp	1.01227
l4Sp	0.883109
l4Sp	1.16743
l4Sp	1.21317
l4Sp	0.46998
l7Sp	1.20835
l7Sp	1.22478
l7Sp	0.433369
l7Sp	1.00077
l7Sp	1.65221
l7Sp	0.470727
l7Sp	2.63781
l7Sp	1.16515
l7Sp	1.30612
l7Sp	0.874556
l7Sp	2.14749
l7Sp	0.635739
l7Sp	0.918695
l7Sp	1.47754
l7Sp	1.46494
l7Sp	0.875082
l7Sp	0.51469
l7Sp	0.638624
l7Sp	0.733294
l7Sp	0.729852
l7Sp	0.579524
l7Sp	0.816346
l7Sp	0.541286
l7Sp	0.776627
l7Sp	0.485893
l7Sp	0.715868
l7Sp	0.770751
l7Sp	0.297841
l7Sp	0.627503
l7Sp	0.340584
l7Sp	0.622847
l7Sp	0.579369
l7Sp	0.536211
l7Sp	0.647539
l7Sp	0.638145
l7Sp	0.500289
l7Sp	0.573825
l7Sp	0.509338
l7Sp	0.48
l7Sp	0.736895
l7Sp	0.435063
l7Sp	0.660354
l7Sp	0.560538
l7Sp	0.639735
l7Sp	0.721666
l7Sp	0.224949
l7Sp	0.598802
l7Sp	0.374748
l7Sp	0.210266
l7Sp	0.211225
l7Sp	1.02013
l7Sp	1.06528
l7Sp	0.987911
l7Sp	1.34723
l7Sp	0.539031
l7Sp	0.761934
l7Sp	0.469083
l7Sp	0.440072
l7Sp	0.582465
l7Sp	0.757805
l7Sp	0.725442
l7Sp	0.474507
l7Sp	0.557573
l7Sp	0.753567
l7Sp	0.770123
l7Sp	1.01739
l7Sp	1.03306
l7Sp	0.688447
l7Sp	1.04691
l7Sp	0.871697
l7Sp	0.554293
l7Sp	0.854179
l7Sp	1.1041
l7Sp	1.19316
l7Sp	1.63996
l7Sp	0.806965
l7Sp	0.626866
l7Sp	0.695392
l7Sp	0.655308
l7Sp	0.588062
l7Sp	0.80429
l7Sp	0.749326
l7Sp	0.553445
l7Sp	0.524017
l7Sp	0.794979
l7Sp	0.685627
l7Sp	0.563236
l7Sp	0.338174
l7Sp	0.813057
l7Sp	0.934112
l7Sp	0.85693
l7Sp	0.794224
l7Sp	0.796029
l7Sp	0.984566
l7Sp	0.533778
l7Sp	0.632992
l7Sp	0.51137
l7Sp	0.695859
l7Sp	0.842173
l7Sp	0.876289
l7Sp	0.364886
l7Sp	0.35592
l7Sp	0.278552
l7Sp	0.481431
l7Sp	0.365854
l7Sp	0.272961
l7Sp	0.591868
l7Sp	0.721397
l7Sp	0.398406
l7Sp	0.994152
l7Sp	0.535602
l7Sp	0.626014
l7Sp	0.407836
l7Sp	0.410397
l7Sp	0.708263
l7Sp	0.392799
l7Sp	0.755634
l7Sp	0.671506
l7Sp	0.794439
l7Sp	0.800305
l7Sp	0.949868
l7Sp	0.492881
l7Sp	0.646204
l7Sp	0.729623
l7Sp	0.850662
l7Sp	0.747746
l7Sp	0.396825
l7Sp	0.857449
l7Sp	0.920084
l7Sp	1.26767
l7Sp	1.52409
l7Sp	0.913134
l7Sp	0.976652
l7Sp	1.05246
l7Sp	1.1857
l7Sp	0.912895
l7Sp	0.454976
l8Sp	0.682716
l8Sp	1.36799
l8Sp	0.554995
l8Sp	0.98896
l8Sp	1.52847
l8Sp	0.560695
l8Sp	2.14376
l8Sp	1.03872
l8Sp	1.31102
l8Sp	0.702576
l8Sp	2.51641
l8Sp	0.847458
l8Sp	1.32239
l8Sp	1.6199
l8Sp	1.61954
l8Sp	0.852974
l8Sp	0.559597
l8Sp	0.753053
l8Sp	0.787851
l8Sp	0.526372
l8Sp	0.607698
l8Sp	0.677011
l8Sp	0.545613
l8Sp	0.574277
l8Sp	0.975768
l8Sp	0.842105
l8Sp	0.594884
l8Sp	0.459418
l8Sp	0.719034
l8Sp	0.604595
l8Sp	0.535598
l8Sp	0.552592
l8Sp	0.603856
l8Sp	0.578704
l8Sp	0.63599
l8Sp	0.536471
l8Sp	0.56205
l8Sp	0.573301
l8Sp	0.588909
l8Sp	0.457591
l8Sp	0.552138
l8Sp	0.568182
l8Sp	0.490702
l8Sp	0.742363
l8Sp	0.659813
l8Sp	0.318607
l8Sp	0.386473
l8Sp	0.386213
l8Sp	0.224916
l8Sp	0.180126
l8Sp	0.648618
l8Sp	0.939582
l8Sp	0.57373
l8Sp	0.956826
l8Sp	0.444527
l8Sp	0.622374
l8Sp	0.630782
l8Sp	0.742115
l8Sp	0.447094
l8Sp	0.791067
l8Sp	0.552367
l8Sp	0.404934
l8Sp	0.437898
l8Sp	0.577303
l8Sp	0.669149
l8Sp	0.960155
l8Sp	0.751615
l8Sp	1.0313
l8Sp	0.841633
l8Sp	0.977801
l8Sp	0.502298
l8Sp	0.904003
l8Sp	1.0833
l8Sp	1.16806
l8Sp	1.44346
l8Sp	0.871681
l8Sp	0.814863
l8Sp	0.577171
l8Sp	0.416551
l8Sp	0.544774
l8Sp	0.566572
l8Sp	0.633817
l8Sp	0.553187
l8Sp	0.675093
l8Sp	1.0775
l8Sp	0.926936
l8Sp	0.66343
l8Sp	0.510517
l8Sp	0.812901
l8Sp	0.722456
l8Sp	0.961137
l8Sp	0.672394
l8Sp	0.737737
l8Sp	0.995175
l8Sp	0.748628
l8Sp	0.897736
l8Sp	0.549149
l8Sp	0.616438
l8Sp	0.909163
l8Sp	0.775194
l8Sp	0.415458
l8Sp	0.438508
l8Sp	0.254105
l8Sp	0.310773
l8Sp	0.237331
l8Sp	0.367002
l8Sp	1.00769
l8Sp	0.560307
l8Sp	0.336323
l8Sp	0.746269
l8Sp	0.348331
l8Sp	0.517464
l8Sp	0.354354
l8Sp	0.485774
l8Sp	0.502197
l8Sp	0.740219
l8Sp	0.603516
l8Sp	0.614649
l8Sp	0.968054
l8Sp	0.687831
l8Sp	0.735639
l8Sp	0.363259
l8Sp	1.03761
l8Sp	0.53135
l8Sp	0.654206
l8Sp	0.577701
l8Sp	0.472747
l8Sp	0.569358
l8Sp	0.779003
l8Sp	0.785634
l8Sp	0.805461
l8Sp	0.82015
l8Sp	0.982993
l8Sp	1.60804
l8Sp	0.941005
l8Sp	0.930306
l8Sp	1.32115
l8Sp	1.17253
l8Sp	1.11154
l8Sp	0.463768
l5Sp	1.03059
l5Sp	1.27926
l5Sp	0.683371
l5Sp	1.96484
l5Sp	0.468326
l5Sp	2.98469
l5Sp	0.94382
l5Sp	0.903161
l5Sp	0.621415
l5Sp	2.08124
l5Sp	0.562796
l5Sp	0.72381
l5Sp	1.69668
l5Sp	1.47005
l5Sp	0.662676
l5Sp	0.411046
l5Sp	0.646015
l5Sp	0.502944
l5Sp	0.589035
l5Sp	0.402994
l5Sp	0.553877
l5Sp	0.40784
l5Sp	0.524027
l5Sp	0.64962
l5Sp	0.550459
l5Sp	0.467082
l5Sp	0.230681
l5Sp	0.515982
l5Sp	0.285956
l5Sp	0.345194
l5Sp	0.813008
l5Sp	0.547851
l5Sp	0.45614
l5Sp	0.498339
l5Sp	0.651567
l5Sp	0.503193
l5Sp	0.673948
l5Sp	0.63234
l5Sp	0.609463
l5Sp	0.630216
l5Sp	0.388319
l5Sp	0.430046
l5Sp	0.431746
l5Sp	0.604839
l5Sp	0.835073
l5Sp	0.649079
l5Sp	0.213721
l5Sp	0.320764
l5Sp	0.172861
l5Sp	0.470662
l5Sp	1.29543
l5Sp	0.929539
l5Sp	0.753992
l5Sp	0.637923
l5Sp	0.457659
l5Sp	0.367593
l5Sp	0.731351
l5Sp	0.435967
l5Sp	0.147059
l5Sp	0.730227
l5Sp	0.605634
l5Sp	0.469197
l5Sp	0.536961
l5Sp	0.653501
l5Sp	0.640595
l5Sp	0.657513
l5Sp	0.879385
l5Sp	0.816517
l5Sp	0.736599
l5Sp	1.07316
l5Sp	0.502141
l5Sp	1.23878
l5Sp	0.992683
l5Sp	0.973433
l5Sp	1.22821
l5Sp	0.713615
l5Sp	0.501725
l5Sp	0.35776
l5Sp	0.634357
l5Sp	0.630583
l5Sp	0.436777
l5Sp	0.630472
l5Sp	0.48022
l5Sp	0.566611
l5Sp	0.674663
l5Sp	0.585093
l5Sp	0.312603
l5Sp	0.445682
l5Sp	0.727201
l5Sp	0.746214
l5Sp	0.963149
l5Sp	0.729927
l5Sp	0.735496
l5Sp	0.709001
l5Sp	0.42684
l5Sp	0.605525
l5Sp	0.425246
l5Sp	0.456175
l5Sp	0.890822
l5Sp	0.232838
l5Sp	0.271301
l5Sp	0.416753
l5Sp	0.0728597
l5Sp	0.16007
l5Sp	0.184719
l5Sp	0.409117
l5Sp	0.620904
l5Sp	0.45606
l5Sp	0.354953
l5Sp	0.663088
l5Sp	0.416028
l5Sp	0.333944
l5Sp	0.149869
l5Sp	0.628397
l5Sp	0.316206
l5Sp	0.61414
l5Sp	0.468718
l5Sp	0.904737
l5Sp	0.742459
l5Sp	0.446815
l5Sp	0.520416
l5Sp	0.552486
l5Sp	0.666455
l5Sp	0.532678
l5Sp	0.407056
l5Sp	0.653915
l5Sp	0.857014
l5Sp	0.768872
l5Sp	0.810604
l5Sp	0.982555
l5Sp	1.07422
l5Sp	0.815678
l5Sp	0.848126
l5Sp	0.872798
l5Sp	1.08606
l5Sp	0.742188
l5Sp	0.382334
l9Sp	0.824077
l9Sp	0.927644
l9Sp	0.985222
l9Sp	0.688073
l9Sp	1.33779
l9Sp	0.464516
l9Sp	2.48756
l9Sp	1.08642
l9Sp	0.736335
l9Sp	0.596718
l9Sp	2.2508
l9Sp	0.743494
l9Sp	0.880853
l9Sp	1.71888
l9Sp	1.62628
l9Sp	0.800565
l9Sp	0.557427
l9Sp	0.68225
l9Sp	0.769859
l9Sp	0.830343
l9Sp	0.34965
l9Sp	0.636544
l9Sp	0.67881
l9Sp	0.60567
l9Sp	0.639135
l9Sp	1.11395
l9Sp	0.525652
l9Sp	0.386997
l9Sp	0.615711
l9Sp	0.400424
l9Sp	0.56794
l9Sp	0.882658
l9Sp	0.597286
l9Sp	0.58922
l9Sp	0.423609
l9Sp	0.656575
l9Sp	0.448339
l9Sp	0.457816
l9Sp	0.421585
l9Sp	0.633734
l9Sp	0.633012
l9Sp	0.528084
l9Sp	0.667506
l9Sp	0.454545
l9Sp	0.564122
l9Sp	0.50184
l9Sp	0.373754
l9Sp	0.396589
l9Sp	0.3371
l9Sp	0.202484
l9Sp	0.4168
l9Sp	0.990099
l9Sp	0.860203
l9Sp	0.989531
l9Sp	1.00897
l9Sp	0.615793
l9Sp	0.583431
l9Sp	0.658183
l9Sp	0.457457
l9Sp	0.52753
l9Sp	0.616139
l9Sp	0.596831
l9Sp	0.406702
l9Sp	0.445104
l9Sp	0.573909
l9Sp	0.774374
l9Sp	0.895592
l9Sp	0.999524
l9Sp	0.74825
l9Sp	0.959045
l9Sp	0.917023
l9Sp	0.550823
l9Sp	0.760209
l9Sp	1.08046
l9Sp	1.00322
l9Sp	1.0159
l9Sp	0.693132
l9Sp	0.467727
l9Sp	0.624035
l9Sp	0.464735
l9Sp	0.458155
l9Sp	0.532688
l9Sp	0.68267
l9Sp	0.629695
l9Sp	0.804971
l9Sp	0.708924
l9Sp	0.525486
l9Sp	0.674309
l9Sp	0.384538
l9Sp	0.874182
l9Sp	0.768171
l9Sp	0.631912
l9Sp	0.300188
l9Sp	0.655949
l9Sp	0.825764
l9Sp	0.538117
l9Sp	0.789578
l9Sp	0.438647
l9Sp	0.761197
l9Sp	1.01424
l9Sp	0.353609
l9Sp	0.302054
l9Sp	0.289352
l9Sp	0.201952
l9Sp	0.305768
l9Sp	0.321699
l9Sp	0.709026
l9Sp	0.698634
l9Sp	0.610638
l9Sp	0.409117
l9Sp	0.254669
l9Sp	0.66296
l9Sp	0.563264
l9Sp	0.384078
l9Sp	0.406872
l9Sp	0.544033
l9Sp	0.602968
l9Sp	0.673968
l9Sp	0.376952
l9Sp	0.857366
l9Sp	0.802998
l9Sp	0.62054
l9Sp	0.714541
l9Sp	0.659541
l9Sp	0.70373
l9Sp	0.832163
l9Sp	0.624268
l9Sp	0.772044
l9Sp	1.05499
l9Sp	0.821153
l9Sp	1.14885
l9Sp	1.01085
l9Sp	0.982973
l9Sp	0.968604
l9Sp	0.796601
l9Sp	0.870269
l9Sp	0.459766

## Sheet: Fig2S8C
charge
99.6771
99.4764
99.6482
99.4296
99.4812
99.6603
99.6533
99.284
99.5769
99.7603
99.4616
99.5377
99.586
99.4051
99.655
99.5027
99.4637
99.5542
99.6651
99.6051
99.802
99.5206
99.5682
99.6488
99.6093
99.5171
99.5674
99.4998
99.4575
99.6368
99.5596
99.7042
99.5364
99.5672
99.7458
99.5412
99.6208
99.6216
99.4977
99.4106
99.5803
99.6174
99.6597
99.7332
99.5185
99.6181
99.5428
99.865
99.6874
99.8387
99.7089
99.5711
99.4016
99.4258
99.6387
99.6092
99.5335
99.5588
99.6794
99.6574
99.7225
99.446
99.5968
99.7795
99.6441
99.5437
99.5183
99.4515
99.711
99.468
99.4263
99.7877
99.6961
99.6213
99.5358
99.5433
99.6271
99.6559
99.7633
99.5242
99.633
99.4124
99.5566
99.4547
99.5771
99.431
99.6479
99.6316
99.4386
99.7098
99.7031
99.461
99.6858
99.623
99.8099
99.7416
99.667
99.8287
99.8768
99.684
99.6011
99.7147
99.8215
99.7783
99.7972
99.7075
99.7179
99.8521
99.5767
99.6258
99.7519
99.6637
99.6379
99.4034
99.7396
99.5598
99.1075
99.4951
99.7294
99.7014
99.6519
99.6004
99.5104
99.4362
99.5185
99.6378
99.5949
99.5085
99.6664
99.6774
99.6559
99.3738
99.5966
99.4948
99.5856
99.619
99.5027
99.5932
99.5281
99.4041
99.5258
99.6209
99.3889
99.5578
99.38
99.6505
99.5434
99.2771
99.4827
99.5717
99.6273
99.6862
99.7878
99.7706
99.6806
99.6954
99.7552
99.6844
99.7697
99.6664
99.3248
99.3936
99.3234
99.6505
99.6544
99.5287
99.5109
99.6702
99.6326
99.5617
99.4213
99.6468
99.7792
99.6806
99.7086
99.5286
99.5469
99.5318
99.0616
99.4406
99.6533
99.636
99.7813
99.6207
99.5652
99.5437
99.502
99.6965
99.4876
99.4343
99.4776
99.5047
99.4022
99.5752
99.5605
99.7223
99.5143
99.4892
99.6228
99.5345
99.775
99.7191
99.7693
99.5094
99.7056
99.7045
99.867
99.4337
99.5901
99.72
99.6404
99.7373
99.7885
99.7986
99.7875
99.8725
99.4658
99.2956
99.3923
99.0842
99.3423
99.5948
99.553
99.4689
99.5423
99.627
99.4857
99.5548
99.5955
99.5808
99.4378
99.5303
99.723
99.5748
99.6135
99.5667
99.5726
99.5088
99.5839
99.5389
99.3754
99.5076
99.6028
99.5977
99.4287
99.7259
99.4497
99.6208
99.1377
99.4148
99.2147
99.4132
99.4887
99.6625
99.5561
99.68
99.8205
99.6765
99.6356
99.7033
99.6974
99.8713
99.7286
99.4383
99.4652
99.6171
99.5265
99.7418
99.6029
99.5893
99.6663
99.7505
99.7875
99.4541
99.5108
99.7659
99.6026
99.676
99.5114
99.5553
99.3381
99.2999
99.4162
99.6144
99.2716
99.4465
99.7485
99.7545
99.4367
99.5299
99.6637
99.5467
99.7169
99.5655
99.5092
99.5005
99.4784
99.7564
99.4142
99.7155
99.717
99.6368
99.5666
99.3692
99.4469
99.5694
99.4513
99.8308
99.772
99.7904
99.6855
99.635
99.856
99.5481
99.7318
99.5871
99.5514
99.7578
99.8435
99.7518
99.5397
99.6243
99.7839
99.8171
99.5594
99.7665
99.7057
99.3849
99.7077
99.4275
99.7294
99.3751
99.3361
99.5498
99.5865
99.819
99.7502
99.7404
99.6497
99.7324
99.698
99.7972
99.6799
99.6871
99.7567
99.6813
99.5772
99.7283
99.7349
99.6026
99.6072
99.6286
99.6333
99.5688
99.627
99.5108
99.5904
99.3956
99.5288
99.7253
99.53
99.7318
99.7423
99.6345
99.7388
99.6637
99.7728
99.7361
99.7856
99.7961
99.6667
99.7215
99.8852
99.8664
99.7678
99.6958
99.6603
99.5849
99.5764
99.6943
99.669
99.6827
99.6924
99.7951
99.7407
99.7729
99.5983
99.6973
99.7576
99.4191
99.7555
99.392
99.5946
99.6027
99.0096
99.6819
99.7588
99.6988
99.6955
99.6883
99.6767
99.8323
99.6803
99.6369
99.6279
99.6404
99.5629
99.6446
99.5596
99.6311
99.3709
99.3706
99.4904
99.5148
99.8778
99.6637
99.7252
99.729
99.7398
99.82
99.7994
99.8176
99.508
99.7965
99.8231
99.7728
99.8395
99.8485
99.7642
99.83
99.7063
