# Supplementary material for: A robust method for measuring aminoacylation through tRNA-Seq
Source: eLife. 2024 Jul 30;12:RP91554. doi: 10.7554/eLife.91554 (PMC11288633; doi:10.7554/eLife.91554)
Supplement: Figure 2—figure supplement 9—source data 1. [file elife-91554-fig2-figsupp9-data1.xlsx]

## Sheet: Fig2S9
charge_mean_H1299	charge_mean_293T	charge_std_H1299	charge_std_293T
96.8558	93.1902	0.191662	0.287003
96.3565	91.6206	0.91011	1.21395
97.1542	93.1592	0.270052	0.311489
95.7074	89.3635	0.382118	1.3434
96.3533	93.9134	0.511732	0.791545
95.7461	93.7713	0.296911	1.11244
95.7615	94.4093	0.260262	0.680218
95.5816	93.0555	0.422026	1.22206
96.0017	93.8063	0.529699	0.73455
94.5882	91.6972	0.163786	0.549532
95.942	89.9141	0.247926	1.27806
91.0753	86.7593		1.17243
95.0637	94.7791	0.278667	1.11632
96.3143	94.9772	0.559216	0.87711
96.6673	90.0088	0.544482	3.05052
97.6002	90.4463	0.544588	2.12168
92.9677	88.4795	0.497393	0.573797
95.8061	93.0799	0.641927	1.23451
77.2741	82.8934	1.04991	6.65368
91.676	88.3526	0.546537	1.21452
91.157	92.681	0.197088	1.65123
96.9707	89.2261	0.182604	5.57767
92.7421	90.8056	0.480635	3.056
94.7271	95.4388	0.54059	1.17503
98.0472	93.1455	0.25877	2.33897
90.5685	87.176	0.635152	1.79609
85.8374	78.6677	1.54318	2.11741
97.4271	92.9325	0.469771	0.677758
97.231	95.3959	0.0563656	0.308814
96.6158	90.3063	0.308988	2.43315
96.4448	92.9197	0.194337	1.41876
89.2196	82.2745	1.19534	2.90827
95.2408	93.4119	0.584475	1.0729
93.8872	93.9268	0.491455	0.87112
95.0519	91.8282	0.390771	1.14296
97.2312	92.7552	0.292652	1.67375
96.8243	87.9044	0.523705	1.25401
95.6519	94.9701	0.321401	0.596101
92.8146	88.7474	0.604187	2.87986
97.0932	95.4932	0.293557	0.410117
96.3548	94.9306	0.64886	0.463707
93.7123	91.4862	0.598097	1.29554
94.2266	89.2955	0.358838	3.29019
88.9923	89.5796	0.855393	0.42308
92.9507	93.3589	0.570836	1.3243
80.0033	74.9395	0.458034	4.47885
94.9	92.7371	0.251507	1.44376
91.7473	92.5264	0.272179	1.83162
81.3113	67.1653	1.25658	1.91542
81.922	72.3013	1.19683	3.07729
80.4648	70.1797	0.310035	2.13975
82.0758	72.5532	0.754723	3.25655
92.3487	80.008	1.02617	4.75709
78.3603	77.9323	1.36275	2.31745
95.7737	79.3894	0.718778	2.51301
95.7762	79.5784	0.58299	3.79747
96.1815	92.5656	0.516628	0.732637
97.5095	93.0399	0.386813	0.736426
96.8296	92.4806	0.273741	1.40272
83.6734	85.9989	0.549423	1.44115
96.9529	94.3795	0.211007	0.88382
96.6962	94.3066	0.214453	0.594638
