# Supplementary material for: A robust method for measuring aminoacylation through tRNA-Seq
Source: eLife. 2024 Jul 30;12:RP91554. doi: 10.7554/eLife.91554 (PMC11288633; doi:10.7554/eLife.91554)
Supplement: Figure 2—source data 1. [file elife-91554-fig2-data1.xlsx]

## Sheet: Fig2C
index	Sample	Intensity
0	Input	0
1	Input	0
2	Input	0
3	Input	0
4	Input	0
5	Input	0
6	Input	0
7	Input	0
8	Input	0
9	Input	0
10	Input	0
11	Input	0
12	Input	0
13	Input	0
14	Input	0
15	Input	0
16	Input	0
17	Input	0
18	Input	0
19	Input	0
20	Input	0
21	Input	0
22	Input	0
23	Input	0
24	Input	0
25	Input	0
26	Input	0
27	Input	0
28	Input	0
29	Input	0
30	Input	0
31	Input	0
32	Input	0
33	Input	0
34	Input	0
35	Input	0
36	Input	0
37	Input	0
38	Input	0
39	Input	0
40	Input	0
41	Input	0
42	Input	0
43	Input	0
44	Input	0
45	Input	0
46	Input	0
47	Input	0
48	Input	0
49	Input	0
50	Input	0
51	Input	0
52	Input	0
53	Input	0
54	Input	0
55	Input	1.17182e-05
56	Input	0.00070368
57	Input	0.00135829
58	Input	0.001173
59	Input	0.000939729
60	Input	0
61	Input	0.000671532
62	Input	0.000217291
63	Input	6.1551e-06
64	Input	0.000499326
65	Input	0.00049327
66	Input	8.74348e-05
67	Input	0.000390762
68	Input	0.00164348
69	Input	0.00212458
70	Input	0.00275077
71	Input	0.0028134
72	Input	0.0013752
73	Input	0.000356023
74	Input	2.59433e-05
75	Input	0.000113673
76	Input	0.000544351
77	Input	0.000740357
78	Input	0.00128697
79	Input	0.000153417
80	Input	0
81	Input	0.00108199
82	Input	0.00225606
83	Input	0.00285462
84	Input	0.0034272
85	Input	0.00118471
86	Input	0.000345933
87	Input	8.76074e-05
88	Input	0.000444982
89	Input	0.000153599
90	Input	0.00013206
91	Input	6.36061e-05
92	Input	1.62203e-05
93	Input	0.000340862
94	Input	0.000360331
95	Input	0.000582159
96	Input	0.000944063
97	Input	0.00103969
98	Input	0.000572041
99	Input	0.000131976
100	Input	3.67103e-05
101	Input	1.23261e-05
102	Input	0
103	Input	0
104	Input	0.000253069
105	Input	0
106	Input	0.000117676
107	Input	0.000778997
108	Input	0.0011357
109	Input	0.000235271
110	Input	0.000151598
111	Input	0
112	Input	0
113	Input	0
114	Input	0
115	Input	0
116	Input	0
117	Input	0
118	Input	0
119	Input	0
120	Input	0
121	Input	0
122	Input	0.00488102
123	Input	0.0237368
124	Input	0.0547499
125	Input	0.100133
126	Input	0.165184
127	Input	0.251657
128	Input	0.359836
129	Input	0.48451
130	Input	0.615302
131	Input	0.738728
132	Input	0.847701
133	Input	0.9289
134	Input	0.981958
135	Input	0.998683
136	Input	0.981348
137	Input	0.928837
138	Input	0.860806
139	Input	0.781597
140	Input	0.698666
141	Input	0.615107
142	Input	0.529311
143	Input	0.447901
144	Input	0.375949
145	Input	0.31253
146	Input	0.258949
147	Input	0.214132
148	Input	0.177329
149	Input	0.146658
150	Input	0.122624
151	Input	0.102146
152	Input	0.085636
153	Input	0.0723375
154	Input	0.0611749
155	Input	0.0513801
156	Input	0.0431795
157	Input	0.0362143
158	Input	0.030228
159	Input	0.0260142
160	Input	0.0221901
161	Input	0.0179776
162	Input	0.0149079
163	Input	0.0121829
164	Input	0.00956707
165	Input	0.00674964
166	Input	0.00503142
167	Input	0.00209085
168	Input	0.000667432
169	Input	0.000846281
170	Input	0.000110473
171	Input	0
172	Input	0.000279216
173	Input	0.00105847
174	Input	0.00361908
175	Input	0.00663984
176	Input	0.00945667
177	Input	0.0133241
178	Input	0.0184566
179	Input	0.024632
180	Input	0.0325647
181	Input	0.0424198
182	Input	0.0542135
183	Input	0.0670638
184	Input	0.0835957
185	Input	0.105336
186	Input	0.132302
187	Input	0.166828
188	Input	0.205921
189	Input	0.250261
190	Input	0.29926
191	Input	0.350777
192	Input	0.40406
193	Input	0.457149
194	Input	0.506785
195	Input	0.548779
196	Input	0.585153
197	Input	0.611053
198	Input	0.624943
199	Input	0.626983
200	Input	0.619942
201	Input	0.601195
202	Input	0.574016
203	Input	0.540605
204	Input	0.504274
205	Input	0.466895
206	Input	0.430804
207	Input	0.397808
208	Input	0.368773
209	Input	0.345421
210	Input	0.330857
211	Input	0.322473
212	Input	0.320362
213	Input	0.321795
214	Input	0.32566
215	Input	0.328456
216	Input	0.327323
217	Input	0.321914
218	Input	0.31001
219	Input	0.29463
220	Input	0.275379
221	Input	0.25511
222	Input	0.236178
223	Input	0.219324
224	Input	0.206802
225	Input	0.198754
226	Input	0.198182
227	Input	0.205585
228	Input	0.219816
229	Input	0.237898
230	Input	0.257158
231	Input	0.274117
232	Input	0.28622
233	Input	0.29299
234	Input	0.29124
235	Input	0.282706
236	Input	0.267124
237	Input	0.247236
238	Input	0.223439
239	Input	0.197171
240	Input	0.170448
241	Input	0.145804
242	Input	0.122162
243	Input	0.102431
244	Input	0.0862357
245	Input	0.0730255
246	Input	0.0620502
247	Input	0.0543686
248	Input	0.0481788
249	Input	0.0411632
250	Input	0.0360735
251	Input	0.0317443
252	Input	0.027729
253	Input	0.02373
254	Input	0.0209521
255	Input	0.0182886
256	Input	0.0157871
257	Input	0.0148411
258	Input	0.0137771
259	Input	0.0128199
260	Input	0.0122711
261	Input	0.0127765
262	Input	0.0141322
263	Input	0.0169011
264	Input	0.0195693
265	Input	0.0223073
266	Input	0.0256156
267	Input	0.0282623
268	Input	0.0309232
269	Input	0.0329699
270	Input	0.0352086
271	Input	0.0360001
272	Input	0.036481
273	Input	0.0362419
274	Input	0.0357064
275	Input	0.0352479
276	Input	0.0348981
277	Input	0.0336764
278	Input	0.0314731
279	Input	0.0295261
280	Input	0.0270685
281	Input	0.024492
282	Input	0.0226316
283	Input	0.0210861
284	Input	0.0189791
285	Input	0.0176721
286	Input	0.016422
287	Input	0.0135661
288	Input	0.0127875
289	Input	0.012816
290	Input	0.012464
291	Input	0.0124817
292	Input	0.0125046
293	Input	0.010932
294	Input	0.0111473
295	Input	0.012338
296	Input	0.0142911
297	Input	0.0169529
298	Input	0.0200873
299	Input	0.0229353
300	Input	0.0258211
301	Input	0.0268219
302	Input	0.0266671
303	Input	0.0268002
304	Input	0.0269044
305	Input	0.0258628
306	Input	0.0255384
307	Input	0.0248605
308	Input	0.0237835
309	Input	0.0242842
310	Input	0.0247581
311	Input	0.0243037
312	Input	0.0241223
313	Input	0.0247139
314	Input	0.0257998
315	Input	0.027055
316	Input	0.0285973
317	Input	0.0293072
318	Input	0.0305171
319	Input	0.0319989
320	Input	0.0334913
321	Input	0.0341496
322	Input	0.0334861
323	Input	0.0317381
324	Input	0.0302519
325	Input	0.0286214
326	Input	0.0282809
327	Input	0.028424
328	Input	0.0282044
329	Input	0.02733
330	Input	0.0266549
331	Input	0.0252384
332	Input	0.0247933
333	Input	0.0246296
334	Input	0.0250167
335	Input	0.025805
336	Input	0.0273443
337	Input	0.0292611
338	Input	0.0313843
339	Input	0.0333685
340	Input	0.0346288
341	Input	0.0345082
342	Input	0.0341086
343	Input	0.0344964
344	Input	0.0354216
345	Input	0.036564
346	Input	0.0390501
347	Input	0.0407085
348	Input	0.0422697
349	Input	0.0442693
350	Input	0.0451758
351	Input	0.0462496
352	Input	0.0475672
353	Input	0.0490896
354	Input	0.0504821
355	Input	0.0514265
356	Input	0.0528086
357	Input	0.0548068
358	Input	0.0573756
359	Input	0.0605321
360	Input	0.063255
361	Input	0.0659295
362	Input	0.0687974
363	Input	0.0725259
364	Input	0.0759384
365	Input	0.0783458
366	Input	0.0799446
367	Input	0.0799398
368	Input	0.0789675
369	Input	0.078459
370	Input	0.0792972
371	Input	0.0800541
372	Input	0.0810091
373	Input	0.0830366
374	Input	0.084528
375	Input	0.0869573
376	Input	0.0908293
377	Input	0.0946857
378	Input	0.0998699
379	Input	0.104565
380	Input	0.110791
381	Input	0.117409
382	Input	0.125308
383	Input	0.134226
384	Input	0.144139
385	Input	0.154608
386	Input	0.16517
387	Input	0.174875
388	Input	0.184811
389	Input	0.193553
390	Input	0.202185
391	Input	0.211196
392	Input	0.220731
393	Input	0.230663
394	Input	0.242684
395	Input	0.255208
396	Input	0.270278
397	Input	0.288589
398	Input	0.3087
399	Input	0.335798
400	Input	0.394763
401	Input	0.631079
402	Input	1.1486
403	Input	1.97869
404	Input	2.9168
405	Input	3.68714
406	Input	4.12047
407	Input	4.07426
408	Input	3.75508
409	Input	3.28061
410	Input	2.75767
411	Input	2.27069
412	Input	1.84697
413	Input	1.52293
414	Input	1.27228
415	Input	1.08652
416	Input	0.928588
417	Input	0.793033
418	Input	0.681308
419	Input	0.59137
420	Input	0.52506
421	Input	0.485323
422	Input	0.463471
423	Input	0.455479
424	Input	0.458865
425	Input	0.468172
426	Input	0.480664
427	Input	0.494748
428	Input	0.512817
429	Input	0.53183
430	Input	0.550551
431	Input	0.567664
432	Input	0.580136
433	Input	0.590564
434	Input	0.59944
435	Input	0.608108
436	Input	0.616256
437	Input	0.623026
438	Input	0.627499
439	Input	0.631908
440	Input	0.634825
441	Input	0.6363
442	Input	0.633762
443	Input	0.629231
444	Input	0.62728
445	Input	0.629465
446	Input	0.638996
447	Input	0.655377
448	Input	0.67512
449	Input	0.693409
450	Input	0.710507
451	Input	0.722583
452	Input	0.733642
453	Input	0.747688
454	Input	0.769868
455	Input	0.801077
456	Input	0.836004
457	Input	0.872052
458	Input	0.912065
459	Input	0.95716
460	Input	1.01091
461	Input	1.07853
462	Input	1.15671
463	Input	1.24122
464	Input	1.34656
465	Input	1.48399
466	Input	1.68485
467	Input	2.16742
468	Input	3.29673
469	Input	5.18166
470	Input	7.4709
471	Input	9.62507
472	Input	11.2057
473	Input	11.8889
474	Input	11.9145
475	Input	11.5448
476	Input	10.912
477	Input	10.1122
478	Input	9.23385
479	Input	8.32689
480	Input	7.41775
481	Input	6.53405
482	Input	5.70951
483	Input	4.96026
484	Input	4.27528
485	Input	3.67341
486	Input	3.17394
487	Input	2.74001
488	Input	2.39253
489	Input	2.10998
490	Input	1.88375
491	Input	1.70274
492	Input	1.55522
493	Input	1.41516
494	Input	1.29391
495	Input	1.18301
496	Input	1.08557
497	Input	0.997012
498	Input	0.914659
499	Input	0.836016
500	Input	0.76442
501	Input	0.695657
502	Input	0.633349
503	Input	0.576491
504	Input	0.529223
505	Input	0.488204
506	Input	0.456352
507	Input	0.429129
508	Input	0.404357
509	Input	0.3829
510	Input	0.362155
511	Input	0.344767
512	Input	0.329728
513	Input	0.317264
514	Input	0.306606
515	Input	0.297596
516	Input	0.289566
517	Input	0.283361
518	Input	0.278419
519	Input	0.276728
520	Input	0.279323
521	Input	0.288111
522	Input	0.301212
523	Input	0.316586
524	Input	0.330249
525	Input	0.338776
526	Input	0.340251
527	Input	0.336892
528	Input	0.327107
529	Input	0.311553
530	Input	0.292635
531	Input	0.273374
532	Input	0.253723
533	Input	0.236547
534	Input	0.221788
535	Input	0.208237
536	Input	0.195755
537	Input	0.184253
538	Input	0.173797
539	Input	0.163956
540	Input	0.154569
541	Input	0.1462
542	Input	0.140077
543	Input	0.135133
544	Input	0.129827
545	Input	0.125366
546	Input	0.119959
547	Input	0.114179
548	Input	0.108814
549	Input	0.104539
550	Input	0.100462
551	Input	0.096714
552	Input	0.0930619
553	Input	0.0904467
554	Input	0.0874938
555	Input	0.0855582
556	Input	0.0835518
557	Input	0.0805619
558	Input	0.0773102
559	Input	0.0749121
560	Input	0.0729341
561	Input	0.0722575
562	Input	0.0717663
563	Input	0.0705682
564	Input	0.0686628
565	Input	0.0660131
566	Input	0.0633286
567	Input	0.0603529
568	Input	0.0577844
569	Input	0.0573444
570	Input	0.0555188
571	Input	0.0534202
572	Input	0.0513834
573	Input	0.0506933
574	Input	0.0495764
575	Input	0.048966
576	Input	0.0479071
577	Input	0.0465767
578	Input	0.0446903
579	Input	0.043666
580	Input	0.0433717
581	Input	0.040845
582	Input	0.0377921
583	Input	0.0355921
584	Input	0.0346792
585	Input	0.0334848
586	Input	0.0325037
587	Input	0.0324772
588	Input	0.0318915
589	Input	0.0320455
590	Input	0.0320726
591	Input	0.0315661
592	Input	0.0298047
593	Input	0.0288945
594	Input	0.0280286
595	Input	0.0278659
596	Input	0.0272964
597	Input	0.0266828
598	Input	0.0264491
599	Input	0.0258081
600	Input	0.024942
601	Input	0.0249522
602	Input	0.0253697
603	Input	0.0249921
604	Input	0.0251228
605	Input	0.0255095
606	Input	0.0258582
607	Input	0.0255327
608	Input	0.024442
609	Input	0.0224089
610	Input	0.0220293
611	Input	0.0227027
612	Input	0.0235683
613	Input	0.0233221
614	Input	0.0221964
615	Input	0.0214903
616	Input	0.0215614
617	Input	0.0215592
618	Input	0.02115
619	Input	0.0203737
620	Input	0.0205568
621	Input	0.0196374
622	Input	0.0189035
623	Input	0.0188248
624	Input	0.0186991
625	Input	0.0183077
626	Input	0.0189747
627	Input	0.0188294
628	Input	0.0186543
629	Input	0.0188922
630	Input	0.0191377
631	Input	0.0189108
632	Input	0.0184851
633	Input	0.0178158
634	Input	0.017115
635	Input	0.0168333
636	Input	0.0161601
637	Input	0.0154001
638	Input	0.014657
639	Input	0.0146835
640	Input	0.0135466
641	Input	0.0132225
642	Input	0.0130349
643	Input	0.0131412
644	Input	0.0130953
645	Input	0.0139421
646	Input	0.013752
647	Input	0.0124753
648	Input	0.0118627
649	Input	0.0109091
650	Input	0.0102465
651	Input	0.00924994
652	Input	0.00900074
653	Input	0.0098669
654	Input	0.0109841
655	Input	0.0110994
656	Input	0.0115927
657	Input	0.010872
658	Input	0.00937863
659	Input	0.00829761
660	Input	0.00853498
661	Input	0.00797034
662	Input	0.00711394
663	Input	0.00620163
664	Input	0.00550181
665	Input	0.00514166
666	Input	0.00508608
667	Input	0.00517331
668	Input	0.00503203
669	Input	0.00462202
670	Input	0.00489776
671	Input	0.00509303
672	Input	0.00552904
673	Input	0.00582182
674	Input	0.00560445
675	Input	0.00483942
676	Input	0.00429163
677	Input	0.00300575
678	Input	0.00291747
679	Input	0.00279268
680	Input	0.00524761
681	Input	0.00609476
682	Input	0.00648727
683	Input	0.00519266
684	Input	0.00321135
685	Input	0.00131468
686	Input	0.000231818
687	Input	0.000640411
688	Input	0.000707582
689	Input	3.75923e-05
690	Input	0.000589163
691	Input	0.00154956
692	Input	0.000972566
693	Input	0.00147562
694	Input	0.00148407
695	Input	0.00120738
696	Input	0.00098412
697	Input	0.00115548
698	Input	0.000248398
699	Input	7.23068e-06
700	Input	0.000398757
701	Input	0.00184687
702	Input	0.00425093
703	Input	0.00559038
704	Input	0.00472215
705	Input	0.00332247
706	Input	0.000550354
707	Input	0
708	Input	0.000156238
709	Input	3.95231e-05
710	Input	0
711	Input	0.000498155
712	Input	0.000616257
713	Input	0
714	Input	0
715	Input	0.00047668
716	Input	0.000213707
717	Input	8.77114e-05
718	Input	0.000729065
719	Input	0.000193618
720	Input	0.000348335
721	Input	0.000106867
722	Input	0.000626139
723	Input	0
724	Input	0
725	Input	6.47086e-05
726	Input	1.51368e-05
727	Input	0.000273327
728	Input	0.000296358
729	Input	0.000204764
730	Input	0
731	Input	0.000451844
732	Input	0
733	Input	0
734	Input	0
735	Input	0
736	Input	9.88389e-05
737	Input	0.0018174
738	Input	0.00171151
739	Input	0.000992564
740	Input	0.000722281
741	Input	0.000127505
742	Input	0
743	Input	0.000369486
744	Input	3.73019e-05
745	Input	0
746	Input	0.000122787
747	Input	0
748	Input	0
749	Input	0
750	Input	0
751	Input	0
752	Input	0
753	Input	0
754	Input	0
755	Input	0
756	Input	0
757	Input	0
758	Input	0
759	Input	0
0	4h, pH=8	0
1	4h, pH=8	0
2	4h, pH=8	0
3	4h, pH=8	0
4	4h, pH=8	0
5	4h, pH=8	0
6	4h, pH=8	0
7	4h, pH=8	0
8	4h, pH=8	0
9	4h, pH=8	0
10	4h, pH=8	0
11	4h, pH=8	0
12	4h, pH=8	0
13	4h, pH=8	0
14	4h, pH=8	0
15	4h, pH=8	0
16	4h, pH=8	0
17	4h, pH=8	0
18	4h, pH=8	0
19	4h, pH=8	0
20	4h, pH=8	0
21	4h, pH=8	0
22	4h, pH=8	0
23	4h, pH=8	0
24	4h, pH=8	0
25	4h, pH=8	0
26	4h, pH=8	0
27	4h, pH=8	0
28	4h, pH=8	0
29	4h, pH=8	0
30	4h, pH=8	0
31	4h, pH=8	0
32	4h, pH=8	0
33	4h, pH=8	0
34	4h, pH=8	0
35	4h, pH=8	0
36	4h, pH=8	0
37	4h, pH=8	0
38	4h, pH=8	0
39	4h, pH=8	0
40	4h, pH=8	0
41	4h, pH=8	0
42	4h, pH=8	0
43	4h, pH=8	0
44	4h, pH=8	0
45	4h, pH=8	0
46	4h, pH=8	0
47	4h, pH=8	0
48	4h, pH=8	0
49	4h, pH=8	0
50	4h, pH=8	0
51	4h, pH=8	0
52	4h, pH=8	0
53	4h, pH=8	0
54	4h, pH=8	0
55	4h, pH=8	0
56	4h, pH=8	0
57	4h, pH=8	0
58	4h, pH=8	0
59	4h, pH=8	0
60	4h, pH=8	0
61	4h, pH=8	0
62	4h, pH=8	0
63	4h, pH=8	0
64	4h, pH=8	0
65	4h, pH=8	0
66	4h, pH=8	8.76447e-05
67	4h, pH=8	0
68	4h, pH=8	0.00172774
69	4h, pH=8	0.00107298
70	4h, pH=8	0.00146307
71	4h, pH=8	0.000916578
72	4h, pH=8	0.00170625
73	4h, pH=8	0.00248915
74	4h, pH=8	0.00300577
75	4h, pH=8	0.0030231
76	4h, pH=8	0.00402946
77	4h, pH=8	0.00436793
78	4h, pH=8	0.0035891
79	4h, pH=8	0.00278647
80	4h, pH=8	0.00266407
81	4h, pH=8	0.00105098
82	4h, pH=8	2.91344e-05
83	4h, pH=8	1.08407e-05
84	4h, pH=8	0.000313536
85	4h, pH=8	0
86	4h, pH=8	0.000419942
87	4h, pH=8	0.000722328
88	4h, pH=8	0.000995316
89	4h, pH=8	0.00304796
90	4h, pH=8	0.00283818
91	4h, pH=8	0.00193056
92	4h, pH=8	0.0013051
93	4h, pH=8	0.00116337
94	4h, pH=8	0.00112169
95	4h, pH=8	0.00130217
96	4h, pH=8	0.00166594
97	4h, pH=8	0.00135165
98	4h, pH=8	0.000546074
99	4h, pH=8	0.00101482
100	4h, pH=8	0.0027223
101	4h, pH=8	0.00314551
102	4h, pH=8	0.00338014
103	4h, pH=8	0.00299519
104	4h, pH=8	0.00221363
105	4h, pH=8	0.000348815
106	4h, pH=8	0
107	4h, pH=8	0
108	4h, pH=8	0
109	4h, pH=8	0
110	4h, pH=8	0.0014493
111	4h, pH=8	0.00113957
112	4h, pH=8	0.000258477
113	4h, pH=8	0
114	4h, pH=8	0.000787074
115	4h, pH=8	0.00277042
116	4h, pH=8	0.00448185
117	4h, pH=8	0.00759797
118	4h, pH=8	0.00856345
119	4h, pH=8	0.0107036
120	4h, pH=8	0.0170964
121	4h, pH=8	0.0256661
122	4h, pH=8	0.0388674
123	4h, pH=8	0.0624717
124	4h, pH=8	0.0981709
125	4h, pH=8	0.150117
126	4h, pH=8	0.221299
127	4h, pH=8	0.315347
128	4h, pH=8	0.42649
129	4h, pH=8	0.550891
130	4h, pH=8	0.676921
131	4h, pH=8	0.792077
132	4h, pH=8	0.890154
133	4h, pH=8	0.956527
134	4h, pH=8	0.992846
135	4h, pH=8	0.997298
136	4h, pH=8	0.976658
137	4h, pH=8	0.929706
138	4h, pH=8	0.86678
139	4h, pH=8	0.789242
140	4h, pH=8	0.703335
141	4h, pH=8	0.612856
142	4h, pH=8	0.527745
143	4h, pH=8	0.448876
144	4h, pH=8	0.37974
145	4h, pH=8	0.319721
146	4h, pH=8	0.268902
147	4h, pH=8	0.226137
148	4h, pH=8	0.192116
149	4h, pH=8	0.165641
150	4h, pH=8	0.142795
151	4h, pH=8	0.124937
152	4h, pH=8	0.108683
153	4h, pH=8	0.0962113
154	4h, pH=8	0.0861276
155	4h, pH=8	0.0792868
156	4h, pH=8	0.0731986
157	4h, pH=8	0.0670424
158	4h, pH=8	0.0588075
159	4h, pH=8	0.0523885
160	4h, pH=8	0.0468612
161	4h, pH=8	0.0428915
162	4h, pH=8	0.0418026
163	4h, pH=8	0.0401126
164	4h, pH=8	0.0368287
165	4h, pH=8	0.0360711
166	4h, pH=8	0.0353211
167	4h, pH=8	0.0349122
168	4h, pH=8	0.0360328
169	4h, pH=8	0.0373183
170	4h, pH=8	0.0390243
171	4h, pH=8	0.0430034
172	4h, pH=8	0.0469604
173	4h, pH=8	0.050877
174	4h, pH=8	0.0565819
175	4h, pH=8	0.0631421
176	4h, pH=8	0.0715365
177	4h, pH=8	0.0817609
178	4h, pH=8	0.0930048
179	4h, pH=8	0.108451
180	4h, pH=8	0.127371
181	4h, pH=8	0.152584
182	4h, pH=8	0.183593
183	4h, pH=8	0.221947
184	4h, pH=8	0.267377
185	4h, pH=8	0.321002
186	4h, pH=8	0.382219
187	4h, pH=8	0.453885
188	4h, pH=8	0.529401
189	4h, pH=8	0.605641
190	4h, pH=8	0.680786
191	4h, pH=8	0.746933
192	4h, pH=8	0.804488
193	4h, pH=8	0.85297
194	4h, pH=8	0.888616
195	4h, pH=8	0.907798
196	4h, pH=8	0.910048
197	4h, pH=8	0.894976
198	4h, pH=8	0.864365
199	4h, pH=8	0.823338
200	4h, pH=8	0.77658
201	4h, pH=8	0.721723
202	4h, pH=8	0.664085
203	4h, pH=8	0.607192
204	4h, pH=8	0.555272
205	4h, pH=8	0.5083
206	4h, pH=8	0.471042
207	4h, pH=8	0.440787
208	4h, pH=8	0.419822
209	4h, pH=8	0.408105
210	4h, pH=8	0.407888
211	4h, pH=8	0.412108
212	4h, pH=8	0.420142
213	4h, pH=8	0.430662
214	4h, pH=8	0.440903
215	4h, pH=8	0.445269
216	4h, pH=8	0.443049
217	4h, pH=8	0.43415
218	4h, pH=8	0.417536
219	4h, pH=8	0.396619
220	4h, pH=8	0.376045
221	4h, pH=8	0.354282
222	4h, pH=8	0.334824
223	4h, pH=8	0.322275
224	4h, pH=8	0.316815
225	4h, pH=8	0.322061
226	4h, pH=8	0.336087
227	4h, pH=8	0.357779
228	4h, pH=8	0.382012
229	4h, pH=8	0.4062
230	4h, pH=8	0.42534
231	4h, pH=8	0.439986
232	4h, pH=8	0.442643
233	4h, pH=8	0.438542
234	4h, pH=8	0.423816
235	4h, pH=8	0.400989
236	4h, pH=8	0.37053
237	4h, pH=8	0.336468
238	4h, pH=8	0.30089
239	4h, pH=8	0.267404
240	4h, pH=8	0.235809
241	4h, pH=8	0.209456
242	4h, pH=8	0.187112
243	4h, pH=8	0.168913
244	4h, pH=8	0.155731
245	4h, pH=8	0.145649
246	4h, pH=8	0.136771
247	4h, pH=8	0.128459
248	4h, pH=8	0.122218
249	4h, pH=8	0.116057
250	4h, pH=8	0.110381
251	4h, pH=8	0.106521
252	4h, pH=8	0.10254
253	4h, pH=8	0.0993614
254	4h, pH=8	0.0975032
255	4h, pH=8	0.0960014
256	4h, pH=8	0.0955124
257	4h, pH=8	0.0965703
258	4h, pH=8	0.100151
259	4h, pH=8	0.103772
260	4h, pH=8	0.10708
261	4h, pH=8	0.110024
262	4h, pH=8	0.113269
263	4h, pH=8	0.117665
264	4h, pH=8	0.124998
265	4h, pH=8	0.13233
266	4h, pH=8	0.14171
267	4h, pH=8	0.14946
268	4h, pH=8	0.156595
269	4h, pH=8	0.161231
270	4h, pH=8	0.163913
271	4h, pH=8	0.167421
272	4h, pH=8	0.173171
273	4h, pH=8	0.17882
274	4h, pH=8	0.182735
275	4h, pH=8	0.184857
276	4h, pH=8	0.184133
277	4h, pH=8	0.183309
278	4h, pH=8	0.183613
279	4h, pH=8	0.181682
280	4h, pH=8	0.181698
281	4h, pH=8	0.181202
282	4h, pH=8	0.180648
283	4h, pH=8	0.182615
284	4h, pH=8	0.183839
285	4h, pH=8	0.184337
286	4h, pH=8	0.185172
287	4h, pH=8	0.186708
288	4h, pH=8	0.18866
289	4h, pH=8	0.191769
290	4h, pH=8	0.195919
291	4h, pH=8	0.202077
292	4h, pH=8	0.20926
293	4h, pH=8	0.21766
294	4h, pH=8	0.227803
295	4h, pH=8	0.238357
296	4h, pH=8	0.249458
297	4h, pH=8	0.261162
298	4h, pH=8	0.271603
299	4h, pH=8	0.28044
300	4h, pH=8	0.286921
301	4h, pH=8	0.290983
302	4h, pH=8	0.295274
303	4h, pH=8	0.300526
304	4h, pH=8	0.306334
305	4h, pH=8	0.314289
306	4h, pH=8	0.322764
307	4h, pH=8	0.330464
308	4h, pH=8	0.340025
309	4h, pH=8	0.350103
310	4h, pH=8	0.358983
311	4h, pH=8	0.36611
312	4h, pH=8	0.370784
313	4h, pH=8	0.374184
314	4h, pH=8	0.37985
315	4h, pH=8	0.386181
316	4h, pH=8	0.393487
317	4h, pH=8	0.40026
318	4h, pH=8	0.405822
319	4h, pH=8	0.4118
320	4h, pH=8	0.417894
321	4h, pH=8	0.422725
322	4h, pH=8	0.430131
323	4h, pH=8	0.436634
324	4h, pH=8	0.444006
325	4h, pH=8	0.451567
326	4h, pH=8	0.458426
327	4h, pH=8	0.466415
328	4h, pH=8	0.476875
329	4h, pH=8	0.48755
330	4h, pH=8	0.497952
331	4h, pH=8	0.509895
332	4h, pH=8	0.51966
333	4h, pH=8	0.531133
334	4h, pH=8	0.542457
335	4h, pH=8	0.551242
336	4h, pH=8	0.557268
337	4h, pH=8	0.567406
338	4h, pH=8	0.579726
339	4h, pH=8	0.59454
340	4h, pH=8	0.612132
341	4h, pH=8	0.631753
342	4h, pH=8	0.652005
343	4h, pH=8	0.673723
344	4h, pH=8	0.696196
345	4h, pH=8	0.72182
346	4h, pH=8	0.74454
347	4h, pH=8	0.766074
348	4h, pH=8	0.783728
349	4h, pH=8	0.797496
350	4h, pH=8	0.80965
351	4h, pH=8	0.824433
352	4h, pH=8	0.839357
353	4h, pH=8	0.852884
354	4h, pH=8	0.866835
355	4h, pH=8	0.881353
356	4h, pH=8	0.899999
357	4h, pH=8	0.919265
358	4h, pH=8	0.940819
359	4h, pH=8	0.95994
360	4h, pH=8	0.97818
361	4h, pH=8	0.997519
362	4h, pH=8	1.01717
363	4h, pH=8	1.03312
364	4h, pH=8	1.04898
365	4h, pH=8	1.06315
366	4h, pH=8	1.07279
367	4h, pH=8	1.08856
368	4h, pH=8	1.11477
369	4h, pH=8	1.14735
370	4h, pH=8	1.19152
371	4h, pH=8	1.23179
372	4h, pH=8	1.2732
373	4h, pH=8	1.31764
374	4h, pH=8	1.35603
375	4h, pH=8	1.38967
376	4h, pH=8	1.42743
377	4h, pH=8	1.45887
378	4h, pH=8	1.49946
379	4h, pH=8	1.54749
380	4h, pH=8	1.5877
381	4h, pH=8	1.62675
382	4h, pH=8	1.66464
383	4h, pH=8	1.69731
384	4h, pH=8	1.72832
385	4h, pH=8	1.76393
386	4h, pH=8	1.79843
387	4h, pH=8	1.82904
388	4h, pH=8	1.85097
389	4h, pH=8	1.87661
390	4h, pH=8	1.90274
391	4h, pH=8	1.94041
392	4h, pH=8	1.98446
393	4h, pH=8	2.0204
394	4h, pH=8	2.05008
395	4h, pH=8	2.07498
396	4h, pH=8	2.11319
397	4h, pH=8	2.19988
398	4h, pH=8	2.40198
399	4h, pH=8	2.80378
400	4h, pH=8	3.41452
401	4h, pH=8	4.12965
402	4h, pH=8	4.74643
403	4h, pH=8	5.09287
404	4h, pH=8	5.06139
405	4h, pH=8	4.73149
406	4h, pH=8	4.23092
407	4h, pH=8	3.70345
408	4h, pH=8	3.23314
409	4h, pH=8	2.85123
410	4h, pH=8	2.58424
411	4h, pH=8	2.39506
412	4h, pH=8	2.28812
413	4h, pH=8	2.21845
414	4h, pH=8	2.17722
415	4h, pH=8	2.15461
416	4h, pH=8	2.15489
417	4h, pH=8	2.16886
418	4h, pH=8	2.19088
419	4h, pH=8	2.20951
420	4h, pH=8	2.22359
421	4h, pH=8	2.25293
422	4h, pH=8	2.28745
423	4h, pH=8	2.32955
424	4h, pH=8	2.35711
425	4h, pH=8	2.38118
426	4h, pH=8	2.40654
427	4h, pH=8	2.42957
428	4h, pH=8	2.44623
429	4h, pH=8	2.45883
430	4h, pH=8	2.45174
431	4h, pH=8	2.43715
432	4h, pH=8	2.42778
433	4h, pH=8	2.41707
434	4h, pH=8	2.41062
435	4h, pH=8	2.41781
436	4h, pH=8	2.42443
437	4h, pH=8	2.43919
438	4h, pH=8	2.46021
439	4h, pH=8	2.48067
440	4h, pH=8	2.49265
441	4h, pH=8	2.50712
442	4h, pH=8	2.52144
443	4h, pH=8	2.55626
444	4h, pH=8	2.60207
445	4h, pH=8	2.66281
446	4h, pH=8	2.72486
447	4h, pH=8	2.77674
448	4h, pH=8	2.82426
449	4h, pH=8	2.87309
450	4h, pH=8	2.91208
451	4h, pH=8	2.94896
452	4h, pH=8	2.97343
453	4h, pH=8	2.98495
454	4h, pH=8	2.99164
455	4h, pH=8	3.00783
456	4h, pH=8	3.01609
457	4h, pH=8	3.03667
458	4h, pH=8	3.07108
459	4h, pH=8	3.10628
460	4h, pH=8	3.15822
461	4h, pH=8	3.22576
462	4h, pH=8	3.31123
463	4h, pH=8	3.41365
464	4h, pH=8	3.52913
465	4h, pH=8	3.65924
466	4h, pH=8	3.87298
467	4h, pH=8	4.22429
468	4h, pH=8	4.72312
469	4h, pH=8	5.307
470	4h, pH=8	5.82581
471	4h, pH=8	6.15472
472	4h, pH=8	6.21782
473	4h, pH=8	6.01854
474	4h, pH=8	5.60305
475	4h, pH=8	5.06387
476	4h, pH=8	4.47022
477	4h, pH=8	3.88519
478	4h, pH=8	3.35264
479	4h, pH=8	2.88387
480	4h, pH=8	2.47969
481	4h, pH=8	2.14604
482	4h, pH=8	1.86733
483	4h, pH=8	1.65711
484	4h, pH=8	1.49339
485	4h, pH=8	1.36668
486	4h, pH=8	1.27307
487	4h, pH=8	1.19909
488	4h, pH=8	1.13557
489	4h, pH=8	1.08362
490	4h, pH=8	1.03788
491	4h, pH=8	0.998242
492	4h, pH=8	0.956702
493	4h, pH=8	0.91247
494	4h, pH=8	0.864304
495	4h, pH=8	0.815718
496	4h, pH=8	0.761915
497	4h, pH=8	0.705784
498	4h, pH=8	0.646273
499	4h, pH=8	0.585755
500	4h, pH=8	0.528514
501	4h, pH=8	0.475454
502	4h, pH=8	0.428161
503	4h, pH=8	0.387484
504	4h, pH=8	0.354462
505	4h, pH=8	0.328695
506	4h, pH=8	0.308377
507	4h, pH=8	0.292371
508	4h, pH=8	0.277307
509	4h, pH=8	0.262923
510	4h, pH=8	0.248291
511	4h, pH=8	0.234838
512	4h, pH=8	0.222266
513	4h, pH=8	0.21253
514	4h, pH=8	0.202936
515	4h, pH=8	0.194504
516	4h, pH=8	0.186171
517	4h, pH=8	0.178847
518	4h, pH=8	0.173036
519	4h, pH=8	0.167039
520	4h, pH=8	0.16249
521	4h, pH=8	0.157724
522	4h, pH=8	0.150287
523	4h, pH=8	0.144669
524	4h, pH=8	0.138339
525	4h, pH=8	0.132463
526	4h, pH=8	0.130121
527	4h, pH=8	0.126413
528	4h, pH=8	0.121266
529	4h, pH=8	0.114292
530	4h, pH=8	0.108548
531	4h, pH=8	0.103613
532	4h, pH=8	0.101742
533	4h, pH=8	0.0981864
534	4h, pH=8	0.0958877
535	4h, pH=8	0.0932474
536	4h, pH=8	0.0907082
537	4h, pH=8	0.0877059
538	4h, pH=8	0.0865698
539	4h, pH=8	0.0836016
540	4h, pH=8	0.0823659
541	4h, pH=8	0.0802319
542	4h, pH=8	0.0761948
543	4h, pH=8	0.073294
544	4h, pH=8	0.0691502
545	4h, pH=8	0.0669109
546	4h, pH=8	0.0651415
547	4h, pH=8	0.0632979
548	4h, pH=8	0.0625299
549	4h, pH=8	0.0626196
550	4h, pH=8	0.0612424
551	4h, pH=8	0.0592313
552	4h, pH=8	0.056412
553	4h, pH=8	0.0531498
554	4h, pH=8	0.0514166
555	4h, pH=8	0.0498531
556	4h, pH=8	0.0493247
557	4h, pH=8	0.0488695
558	4h, pH=8	0.0475769
559	4h, pH=8	0.0458185
560	4h, pH=8	0.0445767
561	4h, pH=8	0.0441076
562	4h, pH=8	0.0445722
563	4h, pH=8	0.0453021
564	4h, pH=8	0.0449788
565	4h, pH=8	0.0432873
566	4h, pH=8	0.0405308
567	4h, pH=8	0.0419024
568	4h, pH=8	0.0416202
569	4h, pH=8	0.04173
570	4h, pH=8	0.0432602
571	4h, pH=8	0.0425969
572	4h, pH=8	0.0398085
573	4h, pH=8	0.0384571
574	4h, pH=8	0.0354571
575	4h, pH=8	0.0316436
576	4h, pH=8	0.0302418
577	4h, pH=8	0.0271243
578	4h, pH=8	0.0250114
579	4h, pH=8	0.0232094
580	4h, pH=8	0.0235481
581	4h, pH=8	0.0252027
582	4h, pH=8	0.0265239
583	4h, pH=8	0.0266733
584	4h, pH=8	0.0269418
585	4h, pH=8	0.0263325
586	4h, pH=8	0.0237396
587	4h, pH=8	0.0225103
588	4h, pH=8	0.0218528
589	4h, pH=8	0.0201465
590	4h, pH=8	0.0202487
591	4h, pH=8	0.0212451
592	4h, pH=8	0.0203177
593	4h, pH=8	0.0191248
594	4h, pH=8	0.0186547
595	4h, pH=8	0.0165259
596	4h, pH=8	0.0153867
597	4h, pH=8	0.0150464
598	4h, pH=8	0.0154035
599	4h, pH=8	0.0144861
600	4h, pH=8	0.0152264
601	4h, pH=8	0.0145063
602	4h, pH=8	0.0141601
603	4h, pH=8	0.0146094
604	4h, pH=8	0.014822
605	4h, pH=8	0.0142306
606	4h, pH=8	0.0131248
607	4h, pH=8	0.0126573
608	4h, pH=8	0.0105032
609	4h, pH=8	0.0108437
610	4h, pH=8	0.0114589
611	4h, pH=8	0.0128058
612	4h, pH=8	0.0127408
613	4h, pH=8	0.012765
614	4h, pH=8	0.0109398
615	4h, pH=8	0.009338
616	4h, pH=8	0.00860414
617	4h, pH=8	0.00759197
618	4h, pH=8	0.00727526
619	4h, pH=8	0.00612688
620	4h, pH=8	0.00621948
621	4h, pH=8	0.00530753
622	4h, pH=8	0.00570082
623	4h, pH=8	0.00674234
624	4h, pH=8	0.00781159
625	4h, pH=8	0.00736045
626	4h, pH=8	0.00719349
627	4h, pH=8	0.00533665
628	4h, pH=8	0.00356079
629	4h, pH=8	0.00268382
630	4h, pH=8	0.00283012
631	4h, pH=8	0.00373307
632	4h, pH=8	0.00486066
633	4h, pH=8	0.00322563
634	4h, pH=8	0.00161773
635	4h, pH=8	0
636	4h, pH=8	0
637	4h, pH=8	0.000791353
638	4h, pH=8	0.00240151
639	4h, pH=8	0.0030733
640	4h, pH=8	0.00377978
641	4h, pH=8	0.00294753
642	4h, pH=8	0.00215724
643	4h, pH=8	0.000743237
644	4h, pH=8	0.000818799
645	4h, pH=8	0.00224337
646	4h, pH=8	0.00381792
647	4h, pH=8	0.00498178
648	4h, pH=8	0.00422208
649	4h, pH=8	0.00299343
650	4h, pH=8	0.000723136
651	4h, pH=8	0.000505199
652	4h, pH=8	0.00113014
653	4h, pH=8	0.00159244
654	4h, pH=8	0.00160699
655	4h, pH=8	0.00173297
656	4h, pH=8	3.60331e-05
657	4h, pH=8	0
658	4h, pH=8	0
659	4h, pH=8	0
660	4h, pH=8	3.48152e-05
661	4h, pH=8	0.000848033
662	4h, pH=8	0.00030944
663	4h, pH=8	0.000875066
664	4h, pH=8	0.00110521
665	4h, pH=8	0.000710591
666	4h, pH=8	2.44799e-05
667	4h, pH=8	5.67485e-06
668	4h, pH=8	3.62418e-05
669	4h, pH=8	0.00105049
670	4h, pH=8	0.00203452
671	4h, pH=8	0.00232568
672	4h, pH=8	0.0012531
673	4h, pH=8	6.94801e-07
674	4h, pH=8	0.000696757
675	4h, pH=8	0.00111928
676	4h, pH=8	0.0017783
677	4h, pH=8	0.00180641
678	4h, pH=8	0.000375115
679	4h, pH=8	0
680	4h, pH=8	0
681	4h, pH=8	0
682	4h, pH=8	0.00129936
683	4h, pH=8	0.00317361
684	4h, pH=8	0.00495931
685	4h, pH=8	0.0048178
686	4h, pH=8	0.00347079
687	4h, pH=8	0.00212053
688	4h, pH=8	0.000678087
689	4h, pH=8	0.000259536
690	4h, pH=8	0.000125815
691	4h, pH=8	0.000667721
692	4h, pH=8	0.000359106
693	4h, pH=8	0.00127904
694	4h, pH=8	0.00248438
695	4h, pH=8	0.00224693
696	4h, pH=8	0.00283189
697	4h, pH=8	0.00281916
698	4h, pH=8	0.000797277
699	4h, pH=8	1.3366e-05
700	4h, pH=8	0.000217682
701	4h, pH=8	1.1352e-05
702	4h, pH=8	0.00109961
703	4h, pH=8	0.00209021
704	4h, pH=8	0.00226693
705	4h, pH=8	0.00205779
706	4h, pH=8	0.00074398
707	4h, pH=8	0
708	4h, pH=8	0.000128971
709	4h, pH=8	0
710	4h, pH=8	0.000483998
711	4h, pH=8	0.000999409
712	4h, pH=8	0.00279223
713	4h, pH=8	0.00251622
714	4h, pH=8	0.00276762
715	4h, pH=8	0.00241738
716	4h, pH=8	0.000641593
717	4h, pH=8	4.23561e-05
718	4h, pH=8	0
719	4h, pH=8	0
720	4h, pH=8	5.72319e-05
721	4h, pH=8	0.000103563
722	4h, pH=8	0
723	4h, pH=8	0
724	4h, pH=8	0.000188393
725	4h, pH=8	0.000635144
726	4h, pH=8	0.00171169
727	4h, pH=8	0.00334705
728	4h, pH=8	0.00245139
729	4h, pH=8	0.000240437
730	4h, pH=8	0
731	4h, pH=8	0.00141515
732	4h, pH=8	0.00182646
733	4h, pH=8	0.00363436
734	4h, pH=8	0.00468945
735	4h, pH=8	0.00333804
736	4h, pH=8	0.00101248
737	4h, pH=8	0
738	4h, pH=8	0
739	4h, pH=8	0
740	4h, pH=8	0
741	4h, pH=8	0
742	4h, pH=8	0
743	4h, pH=8	0
744	4h, pH=8	0
745	4h, pH=8	0
746	4h, pH=8	0
747	4h, pH=8	0
748	4h, pH=8	0
749	4h, pH=8	0
750	4h, pH=8	0.000317663
751	4h, pH=8	0
752	4h, pH=8	0
753	4h, pH=8	0
754	4h, pH=8	0
755	4h, pH=8	0
756	4h, pH=8	0
757	4h, pH=8	0
758	4h, pH=8	0
759	4h, pH=8	0
0	1.5h, pH=9.5	0
1	1.5h, pH=9.5	0
2	1.5h, pH=9.5	0
3	1.5h, pH=9.5	0
4	1.5h, pH=9.5	0
5	1.5h, pH=9.5	0
6	1.5h, pH=9.5	0
7	1.5h, pH=9.5	0
8	1.5h, pH=9.5	0
9	1.5h, pH=9.5	0
10	1.5h, pH=9.5	0
11	1.5h, pH=9.5	0
12	1.5h, pH=9.5	0
13	1.5h, pH=9.5	0
14	1.5h, pH=9.5	0
15	1.5h, pH=9.5	0
16	1.5h, pH=9.5	0
17	1.5h, pH=9.5	0
18	1.5h, pH=9.5	0
19	1.5h, pH=9.5	0
20	1.5h, pH=9.5	0
21	1.5h, pH=9.5	0
22	1.5h, pH=9.5	0
23	1.5h, pH=9.5	0
24	1.5h, pH=9.5	0
25	1.5h, pH=9.5	0
26	1.5h, pH=9.5	0
27	1.5h, pH=9.5	0
28	1.5h, pH=9.5	0
29	1.5h, pH=9.5	0
30	1.5h, pH=9.5	0
31	1.5h, pH=9.5	0
32	1.5h, pH=9.5	0
33	1.5h, pH=9.5	0
34	1.5h, pH=9.5	0
35	1.5h, pH=9.5	0
36	1.5h, pH=9.5	0
37	1.5h, pH=9.5	0
38	1.5h, pH=9.5	0
39	1.5h, pH=9.5	0
40	1.5h, pH=9.5	0
41	1.5h, pH=9.5	0
42	1.5h, pH=9.5	0
43	1.5h, pH=9.5	0
44	1.5h, pH=9.5	0
45	1.5h, pH=9.5	0
46	1.5h, pH=9.5	0
47	1.5h, pH=9.5	0
48	1.5h, pH=9.5	0
49	1.5h, pH=9.5	0
50	1.5h, pH=9.5	0
51	1.5h, pH=9.5	0
52	1.5h, pH=9.5	0
53	1.5h, pH=9.5	0
54	1.5h, pH=9.5	0.000118942
55	1.5h, pH=9.5	0.00104988
56	1.5h, pH=9.5	0.00161018
57	1.5h, pH=9.5	0.00238873
58	1.5h, pH=9.5	0.00335393
59	1.5h, pH=9.5	0.00451262
60	1.5h, pH=9.5	0.0045151
61	1.5h, pH=9.5	0.0050752
62	1.5h, pH=9.5	0.00550068
63	1.5h, pH=9.5	0.0069338
64	1.5h, pH=9.5	0.00733197
65	1.5h, pH=9.5	0.00814715
66	1.5h, pH=9.5	0.00701994
67	1.5h, pH=9.5	0.00397628
68	1.5h, pH=9.5	0.00212695
69	1.5h, pH=9.5	0.001989
70	1.5h, pH=9.5	0.000679983
71	1.5h, pH=9.5	0.000550184
72	1.5h, pH=9.5	0.000451195
73	1.5h, pH=9.5	0.000502115
74	1.5h, pH=9.5	0.000334104
75	1.5h, pH=9.5	0.00192331
76	1.5h, pH=9.5	0.00194088
77	1.5h, pH=9.5	0.00256238
78	1.5h, pH=9.5	0.00225494
79	1.5h, pH=9.5	0.000944749
80	1.5h, pH=9.5	0.00191599
81	1.5h, pH=9.5	0.00140114
82	1.5h, pH=9.5	0.000692669
83	1.5h, pH=9.5	0.00127387
84	1.5h, pH=9.5	0.00139409
85	1.5h, pH=9.5	0.000925377
86	1.5h, pH=9.5	0
87	1.5h, pH=9.5	0.000713191
88	1.5h, pH=9.5	0
89	1.5h, pH=9.5	0
90	1.5h, pH=9.5	0
91	1.5h, pH=9.5	0
92	1.5h, pH=9.5	0
93	1.5h, pH=9.5	0.0022118
94	1.5h, pH=9.5	0.00212133
95	1.5h, pH=9.5	0.00286946
96	1.5h, pH=9.5	0.00346831
97	1.5h, pH=9.5	0.00231307
98	1.5h, pH=9.5	0.000266262
99	1.5h, pH=9.5	0.000535015
100	1.5h, pH=9.5	0.00033882
101	1.5h, pH=9.5	0.00136184
102	1.5h, pH=9.5	0.00214002
103	1.5h, pH=9.5	0.00277377
104	1.5h, pH=9.5	0.00304352
105	1.5h, pH=9.5	0.00410135
106	1.5h, pH=9.5	0.00354336
107	1.5h, pH=9.5	0.00313296
108	1.5h, pH=9.5	0.00247586
109	1.5h, pH=9.5	0.00176015
110	1.5h, pH=9.5	0.00363822
111	1.5h, pH=9.5	0.00671754
112	1.5h, pH=9.5	0.00767255
113	1.5h, pH=9.5	0.00982354
114	1.5h, pH=9.5	0.0122736
115	1.5h, pH=9.5	0.0122959
116	1.5h, pH=9.5	0.0142271
117	1.5h, pH=9.5	0.0159276
118	1.5h, pH=9.5	0.0169209
119	1.5h, pH=9.5	0.0180317
120	1.5h, pH=9.5	0.0225586
121	1.5h, pH=9.5	0.0267021
122	1.5h, pH=9.5	0.0375591
123	1.5h, pH=9.5	0.0570228
124	1.5h, pH=9.5	0.0853392
125	1.5h, pH=9.5	0.124197
126	1.5h, pH=9.5	0.185477
127	1.5h, pH=9.5	0.267375
128	1.5h, pH=9.5	0.373787
129	1.5h, pH=9.5	0.493626
130	1.5h, pH=9.5	0.621592
131	1.5h, pH=9.5	0.742834
132	1.5h, pH=9.5	0.850418
133	1.5h, pH=9.5	0.935229
134	1.5h, pH=9.5	0.985395
135	1.5h, pH=9.5	0.998079
136	1.5h, pH=9.5	0.970003
137	1.5h, pH=9.5	0.915696
138	1.5h, pH=9.5	0.841747
139	1.5h, pH=9.5	0.75488
140	1.5h, pH=9.5	0.66125
141	1.5h, pH=9.5	0.568173
142	1.5h, pH=9.5	0.481071
143	1.5h, pH=9.5	0.403571
144	1.5h, pH=9.5	0.339434
145	1.5h, pH=9.5	0.284237
146	1.5h, pH=9.5	0.238377
147	1.5h, pH=9.5	0.20197
148	1.5h, pH=9.5	0.174169
149	1.5h, pH=9.5	0.151427
150	1.5h, pH=9.5	0.132117
151	1.5h, pH=9.5	0.118287
152	1.5h, pH=9.5	0.106462
153	1.5h, pH=9.5	0.0956047
154	1.5h, pH=9.5	0.0877067
155	1.5h, pH=9.5	0.078578
156	1.5h, pH=9.5	0.0722137
157	1.5h, pH=9.5	0.0669099
158	1.5h, pH=9.5	0.0629023
159	1.5h, pH=9.5	0.0595608
160	1.5h, pH=9.5	0.0579923
161	1.5h, pH=9.5	0.055335
162	1.5h, pH=9.5	0.0529683
163	1.5h, pH=9.5	0.051392
164	1.5h, pH=9.5	0.0499489
165	1.5h, pH=9.5	0.0505368
166	1.5h, pH=9.5	0.0516654
167	1.5h, pH=9.5	0.0522847
168	1.5h, pH=9.5	0.0557429
169	1.5h, pH=9.5	0.0578131
170	1.5h, pH=9.5	0.0603572
171	1.5h, pH=9.5	0.0657635
172	1.5h, pH=9.5	0.0717286
173	1.5h, pH=9.5	0.0807526
174	1.5h, pH=9.5	0.0962053
175	1.5h, pH=9.5	0.116006
176	1.5h, pH=9.5	0.140872
177	1.5h, pH=9.5	0.172104
178	1.5h, pH=9.5	0.212045
179	1.5h, pH=9.5	0.261379
180	1.5h, pH=9.5	0.323787
181	1.5h, pH=9.5	0.396244
182	1.5h, pH=9.5	0.483117
183	1.5h, pH=9.5	0.580981
184	1.5h, pH=9.5	0.691628
185	1.5h, pH=9.5	0.80759
186	1.5h, pH=9.5	0.927095
187	1.5h, pH=9.5	1.04766
188	1.5h, pH=9.5	1.16355
189	1.5h, pH=9.5	1.27533
190	1.5h, pH=9.5	1.3675
191	1.5h, pH=9.5	1.43941
192	1.5h, pH=9.5	1.48302
193	1.5h, pH=9.5	1.50586
194	1.5h, pH=9.5	1.49877
195	1.5h, pH=9.5	1.47843
196	1.5h, pH=9.5	1.43181
197	1.5h, pH=9.5	1.36705
198	1.5h, pH=9.5	1.28616
199	1.5h, pH=9.5	1.19639
200	1.5h, pH=9.5	1.10137
201	1.5h, pH=9.5	1.00868
202	1.5h, pH=9.5	0.918749
203	1.5h, pH=9.5	0.833615
204	1.5h, pH=9.5	0.762036
205	1.5h, pH=9.5	0.702078
206	1.5h, pH=9.5	0.655285
207	1.5h, pH=9.5	0.621278
208	1.5h, pH=9.5	0.596842
209	1.5h, pH=9.5	0.582148
210	1.5h, pH=9.5	0.576825
211	1.5h, pH=9.5	0.575785
212	1.5h, pH=9.5	0.57797
213	1.5h, pH=9.5	0.577935
214	1.5h, pH=9.5	0.57243
215	1.5h, pH=9.5	0.563234
216	1.5h, pH=9.5	0.549019
217	1.5h, pH=9.5	0.53004
218	1.5h, pH=9.5	0.51093
219	1.5h, pH=9.5	0.49416
220	1.5h, pH=9.5	0.475033
221	1.5h, pH=9.5	0.460427
222	1.5h, pH=9.5	0.450172
223	1.5h, pH=9.5	0.447497
224	1.5h, pH=9.5	0.454473
225	1.5h, pH=9.5	0.475929
226	1.5h, pH=9.5	0.503987
227	1.5h, pH=9.5	0.537395
228	1.5h, pH=9.5	0.572528
229	1.5h, pH=9.5	0.603334
230	1.5h, pH=9.5	0.628676
231	1.5h, pH=9.5	0.646143
232	1.5h, pH=9.5	0.651914
233	1.5h, pH=9.5	0.648847
234	1.5h, pH=9.5	0.637832
235	1.5h, pH=9.5	0.618392
236	1.5h, pH=9.5	0.592399
237	1.5h, pH=9.5	0.564985
238	1.5h, pH=9.5	0.534548
239	1.5h, pH=9.5	0.506568
240	1.5h, pH=9.5	0.486662
241	1.5h, pH=9.5	0.469797
242	1.5h, pH=9.5	0.45741
243	1.5h, pH=9.5	0.45106
244	1.5h, pH=9.5	0.449252
245	1.5h, pH=9.5	0.447294
246	1.5h, pH=9.5	0.449919
247	1.5h, pH=9.5	0.451227
248	1.5h, pH=9.5	0.45176
249	1.5h, pH=9.5	0.452905
250	1.5h, pH=9.5	0.455766
251	1.5h, pH=9.5	0.45946
252	1.5h, pH=9.5	0.467604
253	1.5h, pH=9.5	0.479233
254	1.5h, pH=9.5	0.492605
255	1.5h, pH=9.5	0.506175
256	1.5h, pH=9.5	0.522133
257	1.5h, pH=9.5	0.536094
258	1.5h, pH=9.5	0.552602
259	1.5h, pH=9.5	0.570982
260	1.5h, pH=9.5	0.587423
261	1.5h, pH=9.5	0.605564
262	1.5h, pH=9.5	0.626075
263	1.5h, pH=9.5	0.647873
264	1.5h, pH=9.5	0.67041
265	1.5h, pH=9.5	0.692866
266	1.5h, pH=9.5	0.713244
267	1.5h, pH=9.5	0.731044
268	1.5h, pH=9.5	0.750244
269	1.5h, pH=9.5	0.767723
270	1.5h, pH=9.5	0.78584
271	1.5h, pH=9.5	0.802242
272	1.5h, pH=9.5	0.817633
273	1.5h, pH=9.5	0.832473
274	1.5h, pH=9.5	0.846815
275	1.5h, pH=9.5	0.861989
276	1.5h, pH=9.5	0.876989
277	1.5h, pH=9.5	0.890965
278	1.5h, pH=9.5	0.903082
279	1.5h, pH=9.5	0.913937
280	1.5h, pH=9.5	0.925029
281	1.5h, pH=9.5	0.937701
282	1.5h, pH=9.5	0.952279
283	1.5h, pH=9.5	0.969019
284	1.5h, pH=9.5	0.986901
285	1.5h, pH=9.5	1.00382
286	1.5h, pH=9.5	1.02039
287	1.5h, pH=9.5	1.04036
288	1.5h, pH=9.5	1.06165
289	1.5h, pH=9.5	1.08503
290	1.5h, pH=9.5	1.11474
291	1.5h, pH=9.5	1.14915
292	1.5h, pH=9.5	1.18037
293	1.5h, pH=9.5	1.21302
294	1.5h, pH=9.5	1.24345
295	1.5h, pH=9.5	1.27464
296	1.5h, pH=9.5	1.30472
297	1.5h, pH=9.5	1.34265
298	1.5h, pH=9.5	1.38289
299	1.5h, pH=9.5	1.41721
300	1.5h, pH=9.5	1.44548
301	1.5h, pH=9.5	1.4727
302	1.5h, pH=9.5	1.49783
303	1.5h, pH=9.5	1.52592
304	1.5h, pH=9.5	1.56047
305	1.5h, pH=9.5	1.60377
306	1.5h, pH=9.5	1.64653
307	1.5h, pH=9.5	1.68503
308	1.5h, pH=9.5	1.72639
309	1.5h, pH=9.5	1.7655
310	1.5h, pH=9.5	1.79572
311	1.5h, pH=9.5	1.82275
312	1.5h, pH=9.5	1.84172
313	1.5h, pH=9.5	1.84885
314	1.5h, pH=9.5	1.8633
315	1.5h, pH=9.5	1.87601
316	1.5h, pH=9.5	1.9045
317	1.5h, pH=9.5	1.93662
318	1.5h, pH=9.5	1.98121
319	1.5h, pH=9.5	2.02377
320	1.5h, pH=9.5	2.06965
321	1.5h, pH=9.5	2.10336
322	1.5h, pH=9.5	2.13847
323	1.5h, pH=9.5	2.16163
324	1.5h, pH=9.5	2.18022
325	1.5h, pH=9.5	2.1952
326	1.5h, pH=9.5	2.21115
327	1.5h, pH=9.5	2.23223
328	1.5h, pH=9.5	2.25973
329	1.5h, pH=9.5	2.29306
330	1.5h, pH=9.5	2.31779
331	1.5h, pH=9.5	2.33921
332	1.5h, pH=9.5	2.36282
333	1.5h, pH=9.5	2.39422
334	1.5h, pH=9.5	2.43051
335	1.5h, pH=9.5	2.4681
336	1.5h, pH=9.5	2.50379
337	1.5h, pH=9.5	2.54526
338	1.5h, pH=9.5	2.58291
339	1.5h, pH=9.5	2.63654
340	1.5h, pH=9.5	2.70269
341	1.5h, pH=9.5	2.76647
342	1.5h, pH=9.5	2.82737
343	1.5h, pH=9.5	2.88073
344	1.5h, pH=9.5	2.92182
345	1.5h, pH=9.5	2.94651
346	1.5h, pH=9.5	2.97409
347	1.5h, pH=9.5	2.9823
348	1.5h, pH=9.5	2.99214
349	1.5h, pH=9.5	3.00458
350	1.5h, pH=9.5	3.02707
351	1.5h, pH=9.5	3.05061
352	1.5h, pH=9.5	3.07527
353	1.5h, pH=9.5	3.09467
354	1.5h, pH=9.5	3.11784
355	1.5h, pH=9.5	3.14489
356	1.5h, pH=9.5	3.17207
357	1.5h, pH=9.5	3.20177
358	1.5h, pH=9.5	3.2307
359	1.5h, pH=9.5	3.27123
360	1.5h, pH=9.5	3.30991
361	1.5h, pH=9.5	3.34802
362	1.5h, pH=9.5	3.38177
363	1.5h, pH=9.5	3.39227
364	1.5h, pH=9.5	3.40294
365	1.5h, pH=9.5	3.42868
366	1.5h, pH=9.5	3.45601
367	1.5h, pH=9.5	3.49805
368	1.5h, pH=9.5	3.55571
369	1.5h, pH=9.5	3.61024
370	1.5h, pH=9.5	3.65168
371	1.5h, pH=9.5	3.69228
372	1.5h, pH=9.5	3.71019
373	1.5h, pH=9.5	3.72573
374	1.5h, pH=9.5	3.73767
375	1.5h, pH=9.5	3.75426
376	1.5h, pH=9.5	3.76066
377	1.5h, pH=9.5	3.77487
378	1.5h, pH=9.5	3.78207
379	1.5h, pH=9.5	3.79406
380	1.5h, pH=9.5	3.80013
381	1.5h, pH=9.5	3.81627
382	1.5h, pH=9.5	3.82893
383	1.5h, pH=9.5	3.84178
384	1.5h, pH=9.5	3.83559
385	1.5h, pH=9.5	3.8331
386	1.5h, pH=9.5	3.81554
387	1.5h, pH=9.5	3.79224
388	1.5h, pH=9.5	3.77826
389	1.5h, pH=9.5	3.74919
390	1.5h, pH=9.5	3.7117
391	1.5h, pH=9.5	3.68292
392	1.5h, pH=9.5	3.65823
393	1.5h, pH=9.5	3.63108
394	1.5h, pH=9.5	3.60488
395	1.5h, pH=9.5	3.58108
396	1.5h, pH=9.5	3.5493
397	1.5h, pH=9.5	3.53519
398	1.5h, pH=9.5	3.52742
399	1.5h, pH=9.5	3.53731
400	1.5h, pH=9.5	3.56171
401	1.5h, pH=9.5	3.62988
402	1.5h, pH=9.5	3.72016
403	1.5h, pH=9.5	3.8092
404	1.5h, pH=9.5	3.85787
405	1.5h, pH=9.5	3.81787
406	1.5h, pH=9.5	3.70184
407	1.5h, pH=9.5	3.52089
408	1.5h, pH=9.5	3.32531
409	1.5h, pH=9.5	3.13486
410	1.5h, pH=9.5	2.9839
411	1.5h, pH=9.5	2.87786
412	1.5h, pH=9.5	2.81321
413	1.5h, pH=9.5	2.77301
414	1.5h, pH=9.5	2.74297
415	1.5h, pH=9.5	2.71508
416	1.5h, pH=9.5	2.68077
417	1.5h, pH=9.5	2.64448
418	1.5h, pH=9.5	2.60627
419	1.5h, pH=9.5	2.57309
420	1.5h, pH=9.5	2.52521
421	1.5h, pH=9.5	2.48385
422	1.5h, pH=9.5	2.44059
423	1.5h, pH=9.5	2.39705
424	1.5h, pH=9.5	2.35961
425	1.5h, pH=9.5	2.32848
426	1.5h, pH=9.5	2.29221
427	1.5h, pH=9.5	2.2699
428	1.5h, pH=9.5	2.23229
429	1.5h, pH=9.5	2.17466
430	1.5h, pH=9.5	2.10735
431	1.5h, pH=9.5	2.0477
432	1.5h, pH=9.5	1.98472
433	1.5h, pH=9.5	1.93748
434	1.5h, pH=9.5	1.90042
435	1.5h, pH=9.5	1.854
436	1.5h, pH=9.5	1.80906
437	1.5h, pH=9.5	1.77591
438	1.5h, pH=9.5	1.74215
439	1.5h, pH=9.5	1.71248
440	1.5h, pH=9.5	1.6781
441	1.5h, pH=9.5	1.64362
442	1.5h, pH=9.5	1.60371
443	1.5h, pH=9.5	1.56269
444	1.5h, pH=9.5	1.52768
445	1.5h, pH=9.5	1.49589
446	1.5h, pH=9.5	1.47274
447	1.5h, pH=9.5	1.44446
448	1.5h, pH=9.5	1.41674
449	1.5h, pH=9.5	1.38707
450	1.5h, pH=9.5	1.3491
451	1.5h, pH=9.5	1.30868
452	1.5h, pH=9.5	1.26697
453	1.5h, pH=9.5	1.22577
454	1.5h, pH=9.5	1.18776
455	1.5h, pH=9.5	1.1524
456	1.5h, pH=9.5	1.11598
457	1.5h, pH=9.5	1.07661
458	1.5h, pH=9.5	1.0432
459	1.5h, pH=9.5	1.01083
460	1.5h, pH=9.5	0.979171
461	1.5h, pH=9.5	0.950805
462	1.5h, pH=9.5	0.922383
463	1.5h, pH=9.5	0.896053
464	1.5h, pH=9.5	0.869891
465	1.5h, pH=9.5	0.846451
466	1.5h, pH=9.5	0.822763
467	1.5h, pH=9.5	0.800414
468	1.5h, pH=9.5	0.782166
469	1.5h, pH=9.5	0.768128
470	1.5h, pH=9.5	0.753858
471	1.5h, pH=9.5	0.74132
472	1.5h, pH=9.5	0.731663
473	1.5h, pH=9.5	0.720881
474	1.5h, pH=9.5	0.709018
475	1.5h, pH=9.5	0.692128
476	1.5h, pH=9.5	0.670438
477	1.5h, pH=9.5	0.643446
478	1.5h, pH=9.5	0.61598
[truncated: 281 more rows]

## Sheet: Fig2F
AA_codon	charge_mean	Compartment
Ala-GCA	97.0965	Cyto
Ala-GCA	97.1565	Cyto
Ala-GCA	96.8694	Cyto
Ala-GCA	97.0617	Cyto
Ala-GCG	97.865	Cyto
Ala-GCG	97.6937	Cyto
Ala-GCG	97.3952	Cyto
Ala-GCG	97.3601	Cyto
Ala-GCU	94.3929	Cyto
Ala-GCU	94.7232	Cyto
Ala-GCU	93.7888	Cyto
Ala-GCU	94.206	Cyto
Arg-AGA	96.0238	Cyto
Arg-AGA	95.6412	Cyto
Arg-AGA	95.4839	Cyto
Arg-AGA	95.3059	Cyto
Arg-AGG	95.6731	Cyto
Arg-AGG	95.7293	Cyto
Arg-AGG	95.2561	Cyto
Arg-AGG	94.9675	Cyto
Arg-CGA	95.9871	Cyto
Arg-CGA	95.6583	Cyto
Arg-CGA	95.5245	Cyto
Arg-CGA	95.6268	Cyto
Arg-CGG	96.3459	Cyto
Arg-CGG	96.0714	Cyto
Arg-CGG	95.496	Cyto
Arg-CGG	95.9892	Cyto
Arg-CGU	94.6081	Cyto
Arg-CGU	94.4768	Cyto
Arg-CGU	94.1399	Cyto
Arg-CGU	94.3157	Cyto
Asn-AAC	96.3722	Cyto
Asn-AAC	95.9144	Cyto
Asn-AAC	95.7541	Cyto
Asn-AAC	95.7199	Cyto
Asp-GAC	95.1032	Cyto
Asp-GAC	94.73	Cyto
Asp-GAC	93.9917	Cyto
Asp-GAC	94.5684	Cyto
Cys-UGC	97.1223	Cyto
Cys-UGC	97.0161	Cyto
Cys-UGC	95.5135	Cyto
Cys-UGC	96.7385	Cyto
Gln-CAA	97.914	Cyto
Gln-CAA	97.8996	Cyto
Gln-CAA	97.2345	Cyto
Gln-CAA	97.3797	Cyto
Gln-CAG	96.1968	Cyto
Gln-CAG	96.4087	Cyto
Gln-CAG	94.9792	Cyto
Gln-CAG	96.0901	Cyto
Glu-GAA	81.7051	Cyto
Glu-GAA	81.5328	Cyto
Glu-GAA	80.7789	Cyto
Glu-GAA	80.8632	Cyto
Glu-GAG	91.1999	Cyto
Glu-GAG	91.4152	Cyto
Glu-GAG	90.97	Cyto
Glu-GAG	91.0427	Cyto
Gly-GGA	97.2328	Cyto
Gly-GGA	97.0644	Cyto
Gly-GGA	96.9761	Cyto
Gly-GGA	97.0698	Cyto
Gly-GGC	95.5813	Cyto
Gly-GGC	95.6025	Cyto
Gly-GGC	94.6843	Cyto
Gly-GGC	95.1581	Cyto
Gly-GGG	98.3915	Cyto
Gly-GGG	98.3512	Cyto
Gly-GGG	97.9072	Cyto
Gly-GGG	97.8548	Cyto
His-CAC	91.0056	Cyto
His-CAC	90.9915	Cyto
His-CAC	89.6535	Cyto
His-CAC	90.6234	Cyto
Ile-AUA	97.7761	Cyto
Ile-AUA	97.8675	Cyto
Ile-AUA	96.9003	Cyto
Ile-AUA	97.1646	Cyto
Ile-AUU	96.3649	Cyto
Ile-AUU	96.306	Cyto
Ile-AUU	96.155	Cyto
Ile-AUU	95.9966	Cyto
Leu-CUA	96.7907	Cyto
Leu-CUA	96.8372	Cyto
Leu-CUA	96.7294	Cyto
Leu-CUA	96.3855	Cyto
Leu-CUG	95.4364	Cyto
Leu-CUG	95.3581	Cyto
Leu-CUG	94.2496	Cyto
Leu-CUG	94.6392	Cyto
Leu-CUU	94.5937	Cyto
Leu-CUU	94.7004	Cyto
Leu-CUU	93.7414	Cyto
Leu-CUU	93.6275	Cyto
Leu-UUA	94.3232	Cyto
Leu-UUA	94.3623	Cyto
Leu-UUA	94.385	Cyto
Leu-UUA	94.6917	Cyto
Leu-UUG	96.1214	Cyto
Leu-UUG	96.5687	Cyto
Leu-UUG	96.201	Cyto
Leu-UUG	95.6531	Cyto
Lys-AAA	96.2673	Cyto
Lys-AAA	95.695	Cyto
Lys-AAA	95.5656	Cyto
Lys-AAA	95.4564	Cyto
Lys-AAG	97.4856	Cyto
Lys-AAG	97.2268	Cyto
Lys-AAG	96.9611	Cyto
Lys-AAG	97.381	Cyto
Met-AUG	96.9064	Cyto
Met-AUG	96.2992	Cyto
Met-AUG	95.7592	Cyto
Met-AUG	96.0152	Cyto
Phe-UUC	94.7252	Cyto
Phe-UUC	93.9957	Cyto
Phe-UUC	93.9369	Cyto
Phe-UUC	94.2485	Cyto
Pro-CCA	93.6171	Cyto
Pro-CCA	94.0496	Cyto
Pro-CCA	93.4429	Cyto
Pro-CCA	93.5002	Cyto
Pro-CCG	94.9232	Cyto
Pro-CCG	94.439	Cyto
Pro-CCG	94.6054	Cyto
Pro-CCG	94.0828	Cyto
Pro-CCU	92.5295	Cyto
Pro-CCU	92.5338	Cyto
Pro-CCU	92.4226	Cyto
Pro-CCU	91.8949	Cyto
Ser-AGC	81.8694	Cyto
Ser-AGC	80.3938	Cyto
Ser-AGC	80.2392	Cyto
Ser-AGC	80.7042	Cyto
Ser-UCA	84.8451	Cyto
Ser-UCA	83.0659	Cyto
Ser-UCA	83.0227	Cyto
Ser-UCA	82.1373	Cyto
Ser-UCG	82.4842	Cyto
Ser-UCG	82.4443	Cyto
Ser-UCG	81.8336	Cyto
Ser-UCG	81.7513	Cyto
Ser-UCU	82.8882	Cyto
Ser-UCU	82.3037	Cyto
Ser-UCU	81.2804	Cyto
Ser-UCU	81.4161	Cyto
Thr-ACA	93.2072	Cyto
Thr-ACA	93.1436	Cyto
Thr-ACA	90.8297	Cyto
Thr-ACA	92.9813	Cyto
Thr-ACG	96.0105	Cyto
Thr-ACG	96.8133	Cyto
Thr-ACG	94.8599	Cyto
Thr-ACG	96.0388	Cyto
Thr-ACU	93.1824	Cyto
Thr-ACU	93.8794	Cyto
Thr-ACU	91.5888	Cyto
Thr-ACU	93.9292	Cyto
Trp-UGG	97.7719	Cyto
Trp-UGG	97.6286	Cyto
Trp-UGG	97.2624	Cyto
Trp-UGG	97.1195	Cyto
Val-GUA	97.1027	Cyto
Val-GUA	96.9328	Cyto
Val-GUA	96.7461	Cyto
Val-GUA	96.5897	Cyto
Val-GUG	96.6838	Cyto
Val-GUG	96.5683	Cyto
Val-GUG	96.2058	Cyto
Val-GUG	96.3552	Cyto
Val-GUU	97.5908	Cyto
Val-GUU	97.5392	Cyto
Val-GUU	97.0481	Cyto
Val-GUU	97.3956	Cyto
iMet-AUG	97.9231	Cyto
iMet-AUG	97.7081	Cyto
iMet-AUG	97.4291	Cyto
iMet-AUG	97.4603	Cyto
Ala-GCA	95.7129	Mito
Ala-GCA	97	Mito
Arg-CGA	95.4476	Mito
Arg-CGA	96.2072	Mito
Arg-CGA	95.2904	Mito
Arg-CGA	95.3812	Mito
Asn-AAC	91.0753	Mito
Asp-GAC	97.1189	Mito
Asp-GAC	96.2678	Mito
Asp-GAC	95.9095	Mito
Asp-GAC	95.9611	Mito
Gln-CAA	92.657	Mito
Gln-CAA	93.1947	Mito
Gln-CAA	93.5529	Mito
Gln-CAA	92.4661	Mito
Glu-GAA	92.3866	Mito
Glu-GAA	91.5499	Mito
Glu-GAA	91.064	Mito
Glu-GAA	91.7037	Mito
Gly-GGA	93.1298	Mito
Gly-GGA	93.0466	Mito
Gly-GGA	92.0716	Mito
Gly-GGA	92.7205	Mito
His-CAC	87.981	Mito
His-CAC	85.9334	Mito
His-CAC	84.8435	Mito
His-CAC	84.5916	Mito
Ile-AUC	97.2861	Mito
Ile-AUC	97.273	Mito
Ile-AUC	97.1783	Mito
Ile-AUC	97.1867	Mito
Leu-CUA	90.5122	Mito
Leu-CUA	89.7183	Mito
Leu-CUA	87.7065	Mito
Leu-CUA	88.9413	Mito
Leu-UUA	97.3585	Mito
Leu-UUA	97.2051	Mito
Leu-UUA	96.8378	Mito
Leu-UUA	97.5233	Mito
Lys-AAA	93.6532	Mito
Lys-AAA	92.6339	Mito
Lys-AAA	92.2184	Mito
Lys-AAA	92.7528	Mito
Met-AUG	93.9609	Mito
Met-AUG	93.3489	Mito
Met-AUG	94.4303	Mito
Met-AUG	93.1092	Mito
Phe-UUC	89.7894	Mito
Phe-UUC	89.3754	Mito
Phe-UUC	87.8037	Mito
Phe-UUC	89.0005	Mito
Pro-CCA	80.6409	Mito
Pro-CCA	79.918	Mito
Pro-CCA	79.9049	Mito
Pro-CCA	79.5495	Mito
Thr-ACA	78.4114	Mito
Thr-ACA	78.9541	Mito
Thr-ACA	76.4554	Mito
Thr-ACA	79.6202	Mito
Trp-UGA	96.5645	Mito
Trp-UGA	96.1607	Mito
Trp-UGA	95.4581	Mito
Trp-UGA	96.5425	Mito
Val-GUA	84.3095	Mito
Val-GUA	83.4231	Mito
Val-GUA	83.9072	Mito
Val-GUA	83.054	Mito
