# Supplementary material for: A robust method for measuring aminoacylation through tRNA-Seq
Source: eLife. 2024 Jul 30;12:RP91554. doi: 10.7554/eLife.91554 (PMC11288633; doi:10.7554/eLife.91554)
Supplement: Figure 3—figure supplement 1—source data 1. [file elife-91554-fig3-figsupp1-data1.xlsx]

## Sheet: Fig3S1A
RPM_mean	RPM_std	RPM_masked_mean	RPM_masked_std	Type
2702.78	123.817	2755.33	123.983	Transcript
18.5862	3.35014	22.9905	3.72455	Transcript
5109.03	235.62	5229.97	240.554	Transcript
30.9808	7.04371	32.2146	6.62361	Transcript
67.7574	9.84555	67.3736	9.63322	Transcript
33.4729	5.64823	35.9431	5.39779	Transcript
84.0765	7.4054	84.9536	8.26337	Transcript
9494.06	446.392	10024.5	415.376	Transcript
3969.33	340.72	5124.73	172.132	Transcript
5190.13	242.081	5330.6	235.173	Transcript
888.928	39.1337	905.007	42.4247	Transcript
1643.05	91.5106	1672.64	92.0137	Transcript
11730.4	681.972	11957.3	690.759	Transcript
22.7679	3.88515	57.2867	8.0126	Transcript
5037.69	146.873	5052.4	140.881	Transcript
2767.14	100.508	9608.39	327.885	Transcript
3781.14	136.151	3775.46	139.104	Transcript
3770.01	94.5445	3844.12	93.0237	Transcript
3029.91	266.873	3036.87	254.464	Transcript
1404.34	52.5478	1430.14	54.6225	Transcript
6141.69	287.767	8560.03	240.104	Transcript
4906.35	162.134	4883.34	163.004	Transcript
4886.13	248.361	4866.03	246.448	Transcript
928.445	61.6865	1197.01	53.6866	Transcript
18.0405	2.1262	19.5093	2.18416	Transcript
10770.9	473.903	10778.1	464.822	Transcript
8116.81	277.782	8123.67	276.13	Transcript
5133.24	123.174	5152.81	122.818	Transcript
5722.66	249.805	5714.35	249.94	Transcript
4663.57	188.609	4651.44	186.853	Transcript
2286.09	63.1738	2277.84	62.587	Transcript
2148.27	100.303	2163.97	100.496	Transcript
3345.13	92.109	3347.13	91.6873	Transcript
3068.18	118.617	3084.71	116.847	Transcript
2998.21	97.8874	2998.55	95.9518	Transcript
4121.22	141.206	4141.87	146.609	Transcript
736.338	18.2193	738.672	18.8721	Transcript
4122.48	109.836	4126.52	108.417	Transcript
4380.42	308.317	4366.3	308.803	Transcript
3193.21	208.305	3334.48	216.372	Transcript
2842.12	163.599	2829.39	161.599	Transcript
2500.34	158.051	2863.54	175.671	Transcript
211.115	13.2056	7891.25	650.38	Transcript
11.0861	6.17867	35.1268	19.2506	Transcript
3853.95	254.062	3845.95	256.5	Transcript
367.036	28.6585	430.301	37.594	Transcript
1496.05	104.597	1776.21	109.995	Transcript
459.559	36.3115	468.83	37.201	Transcript
11.9128	3.24144	19.5878	4.12958	Transcript
30.6334	20.441	29.6937	20.2167	Transcript
1909.32	97.755	1922.93	101.954	Transcript
19281.5	1530.56	19539.4	1559.62	Transcript
59.7593	7.63852	63.6427	7.06893	Transcript
11.6292	2.21167	11.5396	2.19599	Transcript
10.9676	2.81659	23.9369	4.64915	Transcript
40.0685	5.01143	40.1767	5.19253	Transcript
212.742	22.5907	212.976	22.7941	Transcript
25.5304	4.62509	39.4467	4.28002	Transcript
247.407	22.9077	247.933	22.721	Transcript
19.0887	3.29592	19.1496	3.34858	Transcript
23.6733	6.22463	23.6976	6.16739	Transcript
4.86652	1.7362	11.2595	3.86123	Transcript
6.46446	2.23302	10.3866	3.34085	Transcript
2985.04	327.032	2955.75	324.879	Transcript
1802.85	139.067	1787.93	137.073	Transcript
378.103	35.3426	365.185	36.5973	Transcript
338.551	43.3278	370.776	45.5664	Transcript
87.4295	7.44927	165.811	12.1267	Transcript
456.302	58.7231	485.574	59.3099	Transcript
674.774	70.8118	689.371	71.5263	Transcript
14318.6	1060.85	14251.4	1055.22	Transcript
2516.2	219.632	2548.98	235.071	Transcript
273.255	22.8159	271.209	22.7937	Transcript
431.994	48.2032	428.856	47.7515	Transcript
35.8115	8.39355	35.6032	8.24704	Transcript
86.221	7.28377	85.762	7.14355	Transcript
10.9246	4.10233	11.9511	4.78722	Transcript
883.119	62.9572	876.561	62.278	Transcript
1493.65	85.7507	1510.94	85.436	Transcript
1263.83	101.765	1254.53	101.263	Transcript
19824.4	1109.76	19783.4	1085.63	Transcript
13.4537	2.95995	13.2097	2.97636	Transcript
201.797	12.4581	196.827	11.5363	Transcript
17.895	10.1676	17.405	10.1593	Transcript
8121.19	394.411	8084.87	394.885	Transcript
198.78	22.6468	167.954	20.6322	Transcript
12198.7	480.143	12127.5	474.939	Transcript
29.6262	3.85872	29.7453	4.17504	Transcript
1922.55	259.857	3837.54	387.204	Transcript
18.4375	3.82593	15.5005	4.22578	Transcript
5873.79	298.656	5833.52	295.877	Transcript
8362.51	843.782	8322.61	843.896	Transcript
11.1944	3.66211	10.969	3.74272	Transcript
43.8182	5.54932	43.4787	5.50186	Transcript
14142.7	740.426	14060.7	738.29	Transcript
14555	367.559	14894.2	564.136	Transcript
4829.37	275.356	4793.25	273.748	Transcript
15887.6	934.893	15771	931.115	Transcript
6350.17	422.106	6305.36	418.18	Transcript
21.3586	10.1418	20.4694	8.47305	Transcript
23196.3	1224.77	23035.9	1219.56	Transcript
30.3515	4.75884	30.5324	4.73705	Transcript
52.9915	6.96621	53.7702	6.89467	Transcript
417.335	19.4412	415.783	19.6286	Transcript
708.4	68.3512	703.078	68.1456	Transcript
361.04	33.2781	358.465	33.0633	Transcript
2604.6	94.6417	2616.16	94.533	Transcript
9701.16	925.192	9650.28	921.274	Transcript
4901.09	331.048	4879.41	331.415	Transcript
1331.09	166.314	1339.57	165.632	Transcript
521.013	44.1189	518.882	45.018	Transcript
2496.04	119.854	2490.37	118.952	Transcript
266.894	29.371	280.898	29.5066	Transcript
7.25734	1.8695	1423.48	106.064	Transcript
6402.25	336.227	6455.69	338.972	Transcript
360.933	29.5748	406.223	50.6996	Transcript
30.2426	8.13749	59.4523	30.044	Transcript
1729.27	48.7065	1733.57	49.3443	Transcript
1517.91	115.261	1451.88	112.75	Transcript
1965.53	62.0173	1967.43	61.5243	Transcript
8.85864	2.66158	10.6691	3.46026	Transcript
15802.7	870.949	15826.7	864.248	Transcript
12.4584	2.63927	13.1258	3.55353	Transcript
4020.66	323.5	4247.39	324.073	Transcript
3315.08	160.214	3303.21	160.682	Transcript
301.748	21.099	304.723	22.3693	Transcript
1247.92	56.754	1243.29	56.4741	Transcript
12.3696	4.39617	12.4121	4.46486	Transcript
1720.55	139.98	1711.15	139.896	Transcript
2799.07	118.75	2788.28	119.382	Transcript
2297.63	191.895	2284.41	189.96	Transcript
8657.83	538.9	8606.39	536.282	Transcript
14841.1	1158.69	14781.7	1157.09	Transcript
28.6623	5.25727	28.3695	5.14639	Transcript
34.3064	5.3572	95.9271	30.4629	Transcript
1284.51	107.219	1275.84	106.642	Transcript
8.65667	6.79826	15.6446	6.61055	Transcript
374.706	21.6454	380.758	21.0456	Transcript
1321.49	87.7873	1327.04	86.1714	Transcript
17751.1	742.157	17990	757.457	Transcript
349.532	24.5893	346.553	23.7647	Transcript
23.3142	5.45213	23.3425	5.47522	Transcript
1889.07	179.186	1912.66	182.451	Transcript
13.3023	2.5568	13.0607	2.46027	Transcript
3041.51	131.882	3033.73	131.034	Transcript
54.5009	5.42957	54.4327	5.52814	Transcript
4524.88	112.518	4520.84	114.834	Transcript
4033.9	197.517	4027.77	196.478	Transcript
11.263	4.50111	20.1793	3.16798	Transcript
3384.11	92.8189	3375.03	92.5577	Transcript
20327.9	803.108	20513.2	724.266	Transcript
907.594	66.9815	905.475	68.0058	Transcript
528.237	23.6697	525.267	23.5869	Transcript
50.6579	7.81113	47.6031	8.1558	Transcript
591.576	30.9583	18235.9	1083.98	Transcript
13.5394	4.13571	6834.96	328.71	Transcript
14.4393	4.17812	13.8328	3.90335	Transcript
5306.6	288.596	2328.99	109.446	Transcript
1449.93	64.4302	1429.35	62.9627	Transcript
886.212	66.8547	790.758	56.1178	Transcript
3350.28	126.367	3339.43	126.469	Transcript
6517.57	316.315	2815.28	98.6917	Transcript
754.594	48.8207	750.149	48.3369	Transcript
3.31933	1.33237	1811.66	115.997	Transcript
4.63593	2.20974	3030.2	204.537	Transcript
137.524	11.6156	148.024	13.8878	Transcript
62.2377	7.96451	65.2513	9.73686	Transcript
2839.65	90.1849	2867.73	86.0376	Transcript
100.562	13.244	107.816	12.7461	Transcript
111.484	6.87278	115.041	7.27868	Transcript
1823.85	147.644	1819.06	146.596	Transcript
1216.67	74.9279	1812.98	122.128	Transcript
2459.66	152.697	2461.13	152.366	Transcript
7578.23	383.399	7552.89	384.228	Transcript
158	20.0863	158.666	20.6681	Transcript
899.298	74.1023	1517.46	112.576	Transcript
3687	137.249	3679.82	133.534	Transcript
1480.13	124.357	1460.73	120.046	Transcript
679.059	43.9174	653.521	42.6569	Transcript
726.545	35.5595	724.891	34.4935	Transcript
3371.57	193.593	3444	197.396	Transcript
2323.23	192.827	2440.16	198.638	Transcript
977.554	38.2093	997.592	38.3109	Transcript
1159.91	39.2941	1187.39	43.1311	Transcript
777.108	39.541	790.308	41.0255	Transcript
775.917	45.9236	794.011	47.3104	Transcript
888.904	54.251	886.934	55.2952	Transcript
3186.8	158.541	3176.25	156.606	Transcript
1024.66	82.8229	843.024	69.1886	Transcript
1141.36	59.5123	1143.57	60.7379	Transcript
2141.27	149.338	2141.71	149.907	Transcript
1956.07	73.4524	1947.16	73.4462	Transcript
1801.91	69.4931	2878.04	110.443	Transcript
1507.69	119.269	1497.31	118.447	Transcript
813.212	88.9447	803.444	88.7249	Transcript
146.756	18.2395	137.57	17.7455	Transcript
744.815	66.6526	744.36	67.0668	Transcript
4642.57	562.132	4634.92	561.48	Transcript
1098.25	53.7843	1100.24	53.1608	Transcript
3878.96	110.971	3954.02	127.945	Transcript
25.171	5.84631	22.0328	4.37145	Transcript
148.046	7.53754	154.375	7.40741	Transcript
71.2997	7.30947	75.4246	8.61017	Transcript
67.6218	7.49347	70.036	7.74404	Transcript
480.348	20.1587	518.218	22.9202	Transcript
90.1594	6.09018	91.209	5.55407	Transcript
22.3548	4.60823	61.738	9.66879	Transcript
38.8399	6.8408	8643.33	1183.35	Transcript
379.082	60.6679	492.27	55.036	Transcript
2082.43	294.772	2146.06	306.75	Transcript
1094.39	64.8362	1086.5	64.9666	Transcript
25.1722	6.78231	35.7937	6.75692	Transcript
37.22	4.19017	38.81	4.4991	Transcript
13286.7	1834.32	13116.1	1822.26	Transcript
2720.5	226.391	2699.22	224.985	Transcript
3074.75	98.461	3065.38	97.771	Transcript
684.142	37.9527	699.67	36.3919	Transcript
2463.23	154.385	2444.91	154.38	Transcript
2516.37	240.914	2499.05	240.219	Transcript
411.284	27.707	424.106	23.5437	Transcript
366.76	23.9108	363.786	23.7716	Transcript
28388	943.565	28084.2	924.447	Transcript
111.706	21.7209	204.208	16.2963	Transcript
11.7062	2.89575	187.905	20.1405	Transcript
1022.79	82.1936	1134.16	88.1777	Transcript
1834.31	190.976	1823.42	191.702	Transcript
1066.33	92.8419	1060.4	92.395	Transcript
2077.22	59.03	2090.55	57.7027	Transcript
655.344	62.3397	650.267	61.8005	Transcript
1287.04	57.4697	1277.08	57.1253	Transcript
2864.43	114.947	2848.08	114.246	Transcript
1672.69	99.1694	1758.65	103.014	Transcript
1831.86	75.6632	1822.54	75.9289	Transcript
2087.66	123.552	2083.66	123.856	Transcript
1326.52	57.6408	1320.73	58.289	Transcript
2329.64	103.837	2325.53	105.544	Transcript
2316.53	132.027	2361.06	132.846	Transcript
2463.92	107.536	2444.83	106.308	Transcript
2129.03	113.742	2112.55	112.831	Transcript
4256.77	221.37	4231.44	221.794	Transcript
651.716	61.7016	647.224	60.9825	Transcript
1379.5	38.4258	1385.54	37.1191	Transcript
2817.97	159.525	2801.92	160.605	Transcript
527.099	38.1187	523.297	37.8867	Transcript
6735.99	438.713	6702.33	437.833	Transcript
21995.7	810.648	24405.3	788.522	Codon
15369.4	343.103	22285.5	519.956	Codon
43065.4	1257.2	44141.2	1160.6	Codon
13931.9	800.841	13883.5	795.99	Codon
12472	299.123	12464.9	296.251	Codon
15077	268.867	15122	274.195	Codon
10855.9	353.611	10867.2	353.139	Codon
20159.7	581.359	20194.4	573.776	Codon
28389.7	1326.84	28396.8	1333.37	Codon
28313.7	1409.42	28519.6	1447.09	Codon
14883.9	1152.41	14925.5	1145.42	Codon
10364.1	460.255	10316.5	458.385	Codon
20537.3	1704.73	20435.1	1695.76	Codon
22561.2	781.822	28343.6	1387.08	Codon
22297.2	670.709	20984.9	813.657	Codon
39970	1434.22	39750.1	1426.33	Codon
28758.2	1066.17	28996.6	1293.74	Codon
15277.7	1169.96	15507.1	1335.35	Codon
24526.4	972.582	24399.2	960.703	Codon
9990.05	391.99	9961.37	388.332	Codon
38425.1	1883.7	38313.5	1883.69	Codon
6823.92	360.746	6790.47	360.203	Codon
19863.8	1154.09	20101.9	1142.92	Codon
8005.97	809.431	9141.84	655.589	Codon
4882.12	202.911	4868.17	203.734	Codon
14459.7	641.582	14266.2	646.453	Codon
31160.8	860.238	31647.5	867.165	Codon
37661.9	1404.97	37523	1393.82	Codon
20285.4	449.064	20239.4	451.928	Codon
27761.3	774.88	27719.3	771.694	Codon
11924.2	532.286	7402.38	277.498	Codon
6763.01	338.011	3761.83	153.4	Codon
642.452	28.7372	25093.4	1397.28	Codon
754.734	48.8287	750.149	48.3369	Codon
22043.6	795.517	21986	796.664	Codon
6845.85	260.053	6780.04	249.164	Codon
5166.62	98.6436	5156.86	97.6966	Codon
210.037	19.8244	6330.6	419.761	Codon
16001.6	574.453	15942.5	571.542	Codon
6662.5	301.648	6467.55	289.335	Codon
18394.7	478.741	21872.8	524.653	Codon
19266.5	1575.61	19271.1	1573.9	Codon
32038.2	1482.93	31922.3	1471.32	Codon
9956.92	367.196	9901.47	366.189	Codon
19820.8	2129.77	19608.9	2111.03	Codon
6964.17	919.168	17528.3	985.299	Codon
30504.7	1365.42	30362.5	1353.69	Codon
1022.79	82.1936	1134.16	88.1777	Codon
1834.31	190.976	1823.42	191.702	Codon
1066.33	92.8419	1060.4	92.395	Codon
2077.22	59.03	2090.55	57.7027	Codon
655.344	62.3397	650.267	61.8005	Codon
1287.04	57.4697	1277.08	57.1253	Codon
2864.43	114.947	2848.08	114.246	Codon
1672.69	99.1694	1758.65	103.014	Codon
1831.86	75.6632	1822.54	75.9289	Codon
2087.66	123.552	2083.66	123.856	Codon
1326.52	57.6408	1320.73	58.289	Codon
2329.64	103.837	2325.53	105.544	Codon
2316.53	132.027	2361.06	132.846	Codon
2463.92	107.536	2444.83	106.308	Codon
2129.03	113.742	2112.55	112.831	Codon
4256.77	221.37	4231.44	221.794	Codon
651.716	61.7016	647.224	60.9825	Codon
1379.5	38.4258	1385.54	37.1191	Codon
2817.97	159.525	2801.92	160.605	Codon
527.099	38.1187	523.297	37.8867	Codon
6735.99	438.713	6702.33	437.833	Codon

## Sheet: Fig3S1B
charge_mean	charge_std	charge_masked_mean	charge_masked_std	Type
45.3553	1.10504	45.3515	1.08546	Transcript
39.1725	1.67894	39.2126	1.69692	Transcript
45.2946	2.54365	45.7043	2.6006	Transcript
43.4627	1.73817	44.5456	1.85868	Transcript
45.1033	2.47833	45.1154	2.48216	Transcript
44.4033	2.90457	44.4666	2.94055	Transcript
43.113	1.58951	43.141	1.57263	Transcript
44.8148	2.15811	44.7844	2.1399	Transcript
46.1158	2.63441	44.9437	2.03898	Transcript
45.7998	1.90373	45.7838	1.88236	Transcript
59.2516	2.05207	59.2545	2.06623	Transcript
45.3281	1.77701	45.4064	1.83479	Transcript
44.392	2.76718	44.4341	2.86067	Transcript
45.9457	2.34576	45.0988	2.17729	Transcript
43.1187	2.45331	43.1225	2.46129	Transcript
45.6716	2.19742	45.6656	2.18748	Transcript
49.5527	1.53982	49.4105	1.24879	Transcript
22.4804	1.91241	22.4769	1.9104	Transcript
24.8706	1.70827	24.8627	1.70088	Transcript
21.1933	1.45586	21.2126	1.50001	Transcript
23.7987	1.37617	23.7709	1.38453	Transcript
23.6096	2.1213	23.6095	2.11591	Transcript
20.9945	1.23715	21.0089	1.24351	Transcript
25.3645	2.00157	25.4048	2.00325	Transcript
20.7393	1.2889	20.7273	1.30641	Transcript
23.3877	2.00561	23.393	2.06436	Transcript
20.4999	0.777786	20.5011	0.787967	Transcript
20.9628	1.13733	20.9242	1.1465	Transcript
19.5435	0.834926	19.536	0.866126	Transcript
22.6523	1.29014	22.6392	1.29384	Transcript
22.4584	1.12216	22.4941	1.10026	Transcript
19.4181	0.956154	19.4182	0.947227	Transcript
3.52353	0.689781	3.43134	0.684798	Transcript
2.79473	1.0805	2.85807	0.354541	Transcript
2.66052	0.463991	2.65805	0.466662	Transcript
2.3097	0.572415	2.26182	0.461788	Transcript
65.9828	1.53341	65.9801	1.49501	Transcript
69.8513	1.03598	69.8049	1.01967	Transcript
30.3477	3.89744	30.3383	3.91454	Transcript
31.5188	3.57458	31.5232	3.56993	Transcript
31.5144	3.50345	31.5068	3.50104	Transcript
33.2739	4.03003	33.4603	3.95289	Transcript
43.8961	3.84089	43.9749	3.83357	Transcript
31.0885	4.06593	31.0835	4.06348	Transcript
56.3655	2.43704	56.4566	2.47764	Transcript
49.6013	1.14042	49.5947	1.15112	Transcript
45.5906	1.83374	45.5992	1.83389	Transcript
47.5212	2.27865	48.1319	1.94604	Transcript
63.5858	1.76353	63.589	1.76419	Transcript
69.1896	1.76269	69.1562	1.75627	Transcript
63.5533	2.61587	63.5537	2.60263	Transcript
61.0442	2.05303	61.2756	2.02324	Transcript
64.1256	2.11549	64.1248	2.11789	Transcript
63.8415	2.04095	63.8388	2.04198	Transcript
64.6702	1.62009	64.6738	1.6145	Transcript
43.2067	2.37991	43.203	2.37745	Transcript
86.5238	1.10878	86.5286	1.12821	Transcript
86.8536	0.788096	86.8552	0.78905	Transcript
85.521	0.853976	85.4927	0.849237	Transcript
87.3661	0.904511	87.3776	0.892373	Transcript
87.3148	1.07555	87.3326	1.06993	Transcript
57.5361	18.6748	56.0679	1.34145	Transcript
52.871	1.43725	52.8977	1.48843	Transcript
52.5497	2.34134	52.5138	2.34462	Transcript
50.4576	2.13069	50.3278	2.20921	Transcript
53.2276	1.43857	53.2305	1.44677	Transcript
58.7951	1.87451	58.7975	1.86946	Transcript
57.7695	2.07126	57.6935	1.91087	Transcript
48.7295	2.52791	48.7193	2.52074	Transcript
52.4857	2.64415	52.4396	2.64114	Transcript
58.0227	1.62222	58.023	1.626	Transcript
53.9612	1.0998	53.9558	1.09499	Transcript
52.918	1.50927	52.9284	1.50045	Transcript
49.9628	1.45605	49.9527	1.46038	Transcript
49.3894	1.52713	49.3874	1.53534	Transcript
52.7562	1.99718	52.7532	1.9932	Transcript
46.1252	2.41403	45.4772	2.42156	Transcript
47.2987	1.64867	47.3051	1.6427	Transcript
47.4197	1.1074	47.4818	1.21303	Transcript
49.217	2.13465	49.207	2.13443	Transcript
50.5266	1.66574	50.5209	1.67472	Transcript
54.4995	3.12623	54.468	3.14557	Transcript
50.4332	1.92188	50.4287	1.94911	Transcript
47.7892	1.77925	47.8491	1.77532	Transcript
3.92975	0.659607	7.82603	0.660743	Transcript
6.67052	6.69716	8.96276	0.573006	Transcript
8.1338	0.681748	8.60801	0.630766	Transcript
8.98506	0.561173	8.99856	0.538102	Transcript
8.25427	0.620505	8.27128	0.620214	Transcript
8.21505	0.802192	8.33114	0.885476	Transcript
50.8951	31.1847	54.5685	2.10835	Transcript
42.7025	20.3541	52.5835	1.16833	Transcript
50.7566	1.71442	50.9017	1.78812	Transcript
54.0058	1.63059	53.9461	1.68386	Transcript
52.3025	2.40201	52.5585	1.97185	Transcript
53.5086	1.67225	53.528	1.67108	Transcript
53.6099	1.62118	53.5773	1.6363	Transcript
52.2449	2.11081	53.1834	1.95255	Transcript
55.166	1.3121	55.1193	1.30546	Transcript
52.9891	2.46701	53.003	2.42909	Transcript
71.8729	3.37609	71.9214	3.30298	Transcript
68.1901	3.824	68.3556	3.79384	Transcript
69.055	4.01412	69.1797	3.96133	Transcript
71.1448	4.27028	71.121	4.25516	Transcript
69.3509	4.67886	69.1604	4.27557	Transcript
70.744	3.71099	70.7299	3.67169	Transcript
70.6718	2.58505	70.7043	2.5753	Transcript
71.3651	2.75569	71.3445	2.74584	Transcript
68.4611	2.8464	68.966	2.94229	Transcript
70.4084	3.63375	70.4177	3.62558	Transcript
62.153	2.54132	62.1433	2.53825	Transcript
62.4239	1.92837	62.4311	1.93329	Transcript
62.6702	1.31791	62.7101	1.26622	Transcript
81.3001	4.77878	83.3039	2.00553	Transcript
83.9366	1.76417	84.1055	1.68671	Transcript
88.5561	1.37567	88.5553	1.38426	Transcript
84.5572	1.56185	84.5439	1.56678	Transcript
82.7588	1.64229	82.7595	1.64349	Transcript
84.9257	1.56819	84.9276	1.57217	Transcript
84.8946	1.21823	84.8955	1.22182	Transcript
86.2044	0.956337	86.1944	0.939987	Transcript
44.0679	1.37765	44.0825	1.3745	Transcript
41.3055	1.74196	41.2047	1.70708	Transcript
23.8122	1.14884	23.806	1.16979	Transcript
4.47923	0.719497	4.47554	0.719406	Transcript
68.5762	1.18621	68.6179	1.19882	Transcript
36.9178	1.67973	36.9178	1.67973	Transcript
56.2847	1.88982	56.2699	1.8831	Transcript
54.5959	1.3825	54.6784	1.30497	Transcript
39.8335	1.2944	39.8734	1.28801	Transcript
88.0049	0.925871	87.9839	0.919212	Transcript
47.4662	1.63714	47.4757	1.66193	Transcript
56.4695	2.32295	56.4393	2.30845	Transcript
46.4727	1.37095	46.5014	1.31235	Transcript
67.0072	1.42039	67.0072	1.42039	Transcript
44.7963	1.81701	44.7963	1.81701	Transcript
13.6008	0.644417	13.5982	0.645812	Transcript
61.2913	2.12399	61.3609	2.14203	Transcript
58.8167	1.35009	58.8152	1.35646	Transcript
74.1245	1.1195	74.1394	1.10086	Transcript
45.2957	1.97255	45.0976	1.94779	Codon
48.8401	2.06104	47.4909	1.96046	Codon
43.8146	1.7882	43.929	1.78223	Codon
21.7767	0.893688	21.7625	0.891791	Codon
22.684	1.444	22.683	1.44769	Codon
21.0058	1.03215	20.9927	1.05797	Codon
22.5949	1.32148	22.586	1.3468	Codon
23.8804	1.81004	23.8593	1.81122	Codon
3.09808	0.416287	3.09314	0.413459	Codon
68.8307	1.08053	68.8078	1.07667	Codon
30.4844	3.18186	30.4679	3.17591	Codon
34.3723	2.94488	34.3631	2.95425	Codon
32.5883	3.47407	32.5853	3.4645	Codon
47.2098	1.50422	49.4147	1.41441	Codon
57.8074	2.15075	57.0317	2.33798	Codon
63.8329	1.7561	63.8333	1.74765	Codon
62.28	2.25695	62.3821	2.22723	Codon
66.5373	1.67019	66.5696	1.66113	Codon
43.4568	2.35415	43.451	2.34558	Codon
87.113	1.02032	87.1114	1.03082	Codon
86.0842	0.74946	86.076	0.746572	Codon
54.6271	1.1863	54.6277	1.17988	Codon
58.6173	1.86932	58.5742	1.84364	Codon
54.8816	1.19533	54.603	1.16403	Codon
50.1699	2.3737	50.1544	2.36362	Codon
53.9024	1.34956	53.878	1.35024	Codon
47.8085	1.61595	47.7774	1.62496	Codon
49.7713	1.25213	49.7621	1.25461	Codon
51.7439	2.02094	51.7197	2.0308	Codon
48.5361	1.67529	48.509	1.67393	Codon
8.25366	0.640518	8.31145	0.65318	Codon
8.30583	0.566473	8.74553	0.442272	Codon
4.24193	0.7062	8.13639	0.609786	Codon
53.8349	1.70646	53.809	1.71028	Codon
54.5769	1.5013	54.5708	1.44921	Codon
52.0952	1.55921	52.0614	1.61081	Codon
50.1838	2.80493	53.7815	1.51981	Codon
70.9656	2.7167	70.9532	2.71833	Codon
70.9978	4.0203	70.976	3.946	Codon
73.3274	3.07733	73.3684	3.03502	Codon
62.3697	1.83245	62.3507	1.81913	Codon
55.8591	1.37328	55.8371	1.36552	Codon
85.8675	0.973098	85.8578	0.963331	Codon
84.4213	1.45065	84.4168	1.45689	Codon
86.4596	1.18919	84.7237	1.39946	Codon
44.4119	1.31066	44.4141	1.31101	Codon
41.3055	1.74196	41.2047	1.70708	Codon
23.8122	1.14884	23.806	1.16979	Codon
4.47923	0.719497	4.47554	0.719406	Codon
68.5762	1.18621	68.6179	1.19882	Codon
36.9178	1.67973	36.9178	1.67973	Codon
56.2847	1.88982	56.2699	1.8831	Codon
54.5959	1.3825	54.6784	1.30497	Codon
39.8335	1.2944	39.8734	1.28801	Codon
88.0049	0.925871	87.9839	0.919212	Codon
47.4662	1.63714	47.4757	1.66193	Codon
56.4695	2.32295	56.4393	2.30845	Codon
46.4727	1.37095	46.5014	1.31235	Codon
67.0072	1.42039	67.0072	1.42039	Codon
44.7963	1.81701	44.7963	1.81701	Codon
13.6008	0.644417	13.5982	0.645812	Codon
61.2913	2.12399	61.3609	2.14203	Codon
58.8167	1.35009	58.8152	1.35646	Codon
74.1245	1.1195	74.1394	1.10086	Codon
