# Supplementary material for: A robust method for measuring aminoacylation through tRNA-Seq
Source: eLife. 2024 Jul 30;12:RP91554. doi: 10.7554/eLife.91554 (PMC11288633; doi:10.7554/eLife.91554)
Supplement: Figure 3—figure supplement 2—source data 1. [file elife-91554-fig3-figsupp2-data1.xlsx]

## Sheet: Fig3S2
data_type	sample_name_ox	Anticodon_anno	mut_freq
mut	NaIO4	Lys-UUU-4-1	0.360595
mut	NaCl	Lys-UUU-4-1	0.056553
mut	NaIO4	Lys-UUU-4-1	0.365536
mut	NaCl	Lys-UUU-4-1	0.071133
mut	NaIO4	Lys-UUU-4-1	0.370579
mut	NaCl	Lys-UUU-4-1	0.162463
mut	NaIO4	Lys-UUU-4-1	0.371667
mut	NaCl	Lys-UUU-4-1	0.070987
gap	NaIO4	Lys-UUU-4-1	0.197955
gap	NaCl	Lys-UUU-4-1	0.033072
gap	NaIO4	Lys-UUU-4-1	0.194401
gap	NaCl	Lys-UUU-4-1	0.035912
gap	NaIO4	Lys-UUU-4-1	0.178457
gap	NaCl	Lys-UUU-4-1	0.095944
gap	NaIO4	Lys-UUU-4-1	0.259333
gap	NaCl	Lys-UUU-4-1	0.039034
RTstops	NaIO4	Lys-UUU-4-1	0
RTstops	NaCl	Lys-UUU-4-1	0
RTstops	NaIO4	Lys-UUU-4-1	0
RTstops	NaCl	Lys-UUU-4-1	0
RTstops	NaIO4	Lys-UUU-4-1	0
RTstops	NaCl	Lys-UUU-4-1	0
RTstops	NaIO4	Lys-UUU-4-1	0
RTstops	NaCl	Lys-UUU-4-1	0
mut	NaIO4	Gln-UUG-1-1	0.544319
mut	NaCl	Gln-UUG-1-1	0.097104
mut	NaIO4	Gln-UUG-1-1	0.517125
mut	NaCl	Gln-UUG-1-1	0.114558
mut	NaIO4	Gln-UUG-1-1	0.575291
mut	NaCl	Gln-UUG-1-1	0.1881
mut	NaIO4	Gln-UUG-1-1	0.511482
mut	NaCl	Gln-UUG-1-1	0.138259
gap	NaIO4	Gln-UUG-1-1	0.031817
gap	NaCl	Gln-UUG-1-1	0.011133
gap	NaIO4	Gln-UUG-1-1	0.028114
gap	NaCl	Gln-UUG-1-1	0.008337
gap	NaIO4	Gln-UUG-1-1	0.023683
gap	NaCl	Gln-UUG-1-1	0.012912
gap	NaIO4	Gln-UUG-1-1	0.026096
gap	NaCl	Gln-UUG-1-1	0.009638
RTstops	NaIO4	Gln-UUG-1-1	0
RTstops	NaCl	Gln-UUG-1-1	0
RTstops	NaIO4	Gln-UUG-1-1	0
RTstops	NaCl	Gln-UUG-1-1	0
RTstops	NaIO4	Gln-UUG-1-1	0
RTstops	NaCl	Gln-UUG-1-1	0
RTstops	NaIO4	Gln-UUG-1-1	0
RTstops	NaCl	Gln-UUG-1-1	0
mut	NaIO4	Arg-UCU-1-1	0.107871
mut	NaCl	Arg-UCU-1-1	0.016198
mut	NaIO4	Arg-UCU-1-1	0.098544
mut	NaCl	Arg-UCU-1-1	0.017839
mut	NaIO4	Arg-UCU-1-1	0.11914
mut	NaCl	Arg-UCU-1-1	0.042008
mut	NaIO4	Arg-UCU-1-1	0.076398
mut	NaCl	Arg-UCU-1-1	0.020507
gap	NaIO4	Arg-UCU-1-1	0.009899
gap	NaCl	Arg-UCU-1-1	0.002551
gap	NaIO4	Arg-UCU-1-1	0.009546
gap	NaCl	Arg-UCU-1-1	0.001603
gap	NaIO4	Arg-UCU-1-1	0.011541
gap	NaCl	Arg-UCU-1-1	0.001791
gap	NaIO4	Arg-UCU-1-1	0.002658
gap	NaCl	Arg-UCU-1-1	0.001656
RTstops	NaIO4	Arg-UCU-1-1	59.6415
RTstops	NaCl	Arg-UCU-1-1	15.731
RTstops	NaIO4	Arg-UCU-1-1	56.8684
RTstops	NaCl	Arg-UCU-1-1	17.6859
RTstops	NaIO4	Arg-UCU-1-1	54.4165
RTstops	NaCl	Arg-UCU-1-1	31.7283
RTstops	NaIO4	Arg-UCU-1-1	61.5994
RTstops	NaCl	Arg-UCU-1-1	17.8173
mut	NaIO4	Arg-UCG-3-1	0.00168
mut	NaCl	Arg-UCG-3-1	0.00158
mut	NaIO4	Arg-UCG-3-1	0.002429
mut	NaCl	Arg-UCG-3-1	0.001421
mut	NaIO4	Arg-UCG-3-1	0.001946
mut	NaCl	Arg-UCG-3-1	0.00163
mut	NaIO4	Arg-UCG-3-1	0.003368
mut	NaCl	Arg-UCG-3-1	0.00196
gap	NaIO4	Arg-UCG-3-1	0.000336
gap	NaCl	Arg-UCG-3-1	7.5e-05
gap	NaIO4	Arg-UCG-3-1	0.000442
gap	NaCl	Arg-UCG-3-1	0
gap	NaIO4	Arg-UCG-3-1	0.000162
gap	NaCl	Arg-UCG-3-1	0
gap	NaIO4	Arg-UCG-3-1	0.000204
gap	NaCl	Arg-UCG-3-1	0.000157
RTstops	NaIO4	Arg-UCG-3-1	0
RTstops	NaCl	Arg-UCG-3-1	0
RTstops	NaIO4	Arg-UCG-3-1	0
RTstops	NaCl	Arg-UCG-3-1	0
RTstops	NaIO4	Arg-UCG-3-1	0
RTstops	NaCl	Arg-UCG-3-1	0
RTstops	NaIO4	Arg-UCG-3-1	0
RTstops	NaCl	Arg-UCG-3-1	0
mut	NaIO4	Glu-UUC-2-1	0.604439
mut	NaCl	Glu-UUC-2-1	0.159941
mut	NaIO4	Glu-UUC-2-1	0.577085
mut	NaCl	Glu-UUC-2-1	0.165056
mut	NaIO4	Glu-UUC-2-1	0.620626
mut	NaCl	Glu-UUC-2-1	0.318015
mut	NaIO4	Glu-UUC-2-1	0.611665
mut	NaCl	Glu-UUC-2-1	0.190427
gap	NaIO4	Glu-UUC-2-1	0.047771
gap	NaCl	Glu-UUC-2-1	0.035637
gap	NaIO4	Glu-UUC-2-1	0.043164
gap	NaCl	Glu-UUC-2-1	0.028281
gap	NaIO4	Glu-UUC-2-1	0.031476
gap	NaCl	Glu-UUC-2-1	0.035054
gap	NaIO4	Glu-UUC-2-1	0.029906
gap	NaCl	Glu-UUC-2-1	0.033669
RTstops	NaIO4	Glu-UUC-2-1	17.0873
RTstops	NaCl	Glu-UUC-2-1	7.17618
RTstops	NaIO4	Glu-UUC-2-1	15.9859
RTstops	NaCl	Glu-UUC-2-1	7.69121
RTstops	NaIO4	Glu-UUC-2-1	14.4349
RTstops	NaCl	Glu-UUC-2-1	10.3449
RTstops	NaIO4	Glu-UUC-2-1	11.1457
RTstops	NaCl	Glu-UUC-2-1	7.24773
