# Supplementary material for: A robust method for measuring aminoacylation through tRNA-Seq
Source: eLife. 2024 Jul 30;12:RP91554. doi: 10.7554/eLife.91554 (PMC11288633; doi:10.7554/eLife.91554)
Supplement: Figure 3—figure supplement 3—source data 1. [file elife-91554-fig3-figsupp3-data1.xlsx]

## Sheet: Fig3S2
data_type	sample_name_poly	Anticodon_anno	mut_freq
mut	Maxima	Lys-UUU-4-1	0.09127
mut	Maxima	Lys-UUU-4-1	0.079641
mut	Maxima	Lys-UUU-4-1	0.070205
mut	Maxima	Lys-UUU-4-1	0.059436
mut	Maxima	Lys-UUU-4-1	0.08559
mut	Maxima	Lys-UUU-4-1	0.071429
mut	Maxima	Lys-UUU-4-1	0.089932
mut	TGIRT	Lys-UUU-4-1	0.126866
mut	TGIRT	Lys-UUU-4-1	0.091085
mut	TGIRT	Lys-UUU-4-1	0.130247
mut	TGIRT	Lys-UUU-4-1	0.115023
mut	TGIRT	Lys-UUU-4-1	0.253352
mut	TGIRT	Lys-UUU-4-1	0.123397
mut	TGIRT	Lys-UUU-4-1	0.219444
gap	Maxima	Lys-UUU-4-1	0.06746
gap	Maxima	Lys-UUU-4-1	0.073312
gap	Maxima	Lys-UUU-4-1	0.063356
gap	Maxima	Lys-UUU-4-1	0.059436
gap	Maxima	Lys-UUU-4-1	0.082513
gap	Maxima	Lys-UUU-4-1	0.056548
gap	Maxima	Lys-UUU-4-1	0.084408
gap	TGIRT	Lys-UUU-4-1	0.089552
gap	TGIRT	Lys-UUU-4-1	0.060078
gap	TGIRT	Lys-UUU-4-1	0.100617
gap	TGIRT	Lys-UUU-4-1	0.100939
gap	TGIRT	Lys-UUU-4-1	0.193008
gap	TGIRT	Lys-UUU-4-1	0.091346
gap	TGIRT	Lys-UUU-4-1	0.163194
RTstops	Maxima	Lys-UUU-4-1	0
RTstops	Maxima	Lys-UUU-4-1	0
RTstops	Maxima	Lys-UUU-4-1	0
RTstops	Maxima	Lys-UUU-4-1	0
RTstops	Maxima	Lys-UUU-4-1	0
RTstops	Maxima	Lys-UUU-4-1	0
RTstops	Maxima	Lys-UUU-4-1	0
RTstops	TGIRT	Lys-UUU-4-1	0
RTstops	TGIRT	Lys-UUU-4-1	0
RTstops	TGIRT	Lys-UUU-4-1	0
RTstops	TGIRT	Lys-UUU-4-1	0
RTstops	TGIRT	Lys-UUU-4-1	0
RTstops	TGIRT	Lys-UUU-4-1	0
RTstops	TGIRT	Lys-UUU-4-1	0
mut	Maxima	Gln-UUG-1-1	0.397451
mut	Maxima	Gln-UUG-1-1	0.388798
mut	Maxima	Gln-UUG-1-1	0.40845
mut	Maxima	Gln-UUG-1-1	0.409519
mut	Maxima	Gln-UUG-1-1	0.419955
mut	Maxima	Gln-UUG-1-1	0.412582
mut	Maxima	Gln-UUG-1-1	0.372496
mut	TGIRT	Gln-UUG-1-1	0.350651
mut	TGIRT	Gln-UUG-1-1	0.409727
mut	TGIRT	Gln-UUG-1-1	0.386201
mut	TGIRT	Gln-UUG-1-1	0.452224
mut	TGIRT	Gln-UUG-1-1	0.453808
mut	TGIRT	Gln-UUG-1-1	0.451817
mut	TGIRT	Gln-UUG-1-1	0.377006
gap	Maxima	Gln-UUG-1-1	0.066935
gap	Maxima	Gln-UUG-1-1	0.07355
gap	Maxima	Gln-UUG-1-1	0.074883
gap	Maxima	Gln-UUG-1-1	0.078332
gap	Maxima	Gln-UUG-1-1	0.066551
gap	Maxima	Gln-UUG-1-1	0.07132
gap	Maxima	Gln-UUG-1-1	0.068667
gap	TGIRT	Gln-UUG-1-1	0.022833
gap	TGIRT	Gln-UUG-1-1	0.024256
gap	TGIRT	Gln-UUG-1-1	0.024087
gap	TGIRT	Gln-UUG-1-1	0.035283
gap	TGIRT	Gln-UUG-1-1	0.018646
gap	TGIRT	Gln-UUG-1-1	0.026613
gap	TGIRT	Gln-UUG-1-1	0.024865
RTstops	Maxima	Gln-UUG-1-1	0
RTstops	Maxima	Gln-UUG-1-1	0
RTstops	Maxima	Gln-UUG-1-1	0
RTstops	Maxima	Gln-UUG-1-1	0
RTstops	Maxima	Gln-UUG-1-1	0
RTstops	Maxima	Gln-UUG-1-1	0
RTstops	Maxima	Gln-UUG-1-1	0
RTstops	TGIRT	Gln-UUG-1-1	0
RTstops	TGIRT	Gln-UUG-1-1	0
RTstops	TGIRT	Gln-UUG-1-1	0
RTstops	TGIRT	Gln-UUG-1-1	0
RTstops	TGIRT	Gln-UUG-1-1	0
RTstops	TGIRT	Gln-UUG-1-1	0
RTstops	TGIRT	Gln-UUG-1-1	0
mut	Maxima	Arg-UCU-1-1	0.349341
mut	Maxima	Arg-UCU-1-1	0.379386
mut	Maxima	Arg-UCU-1-1	0.357984
mut	Maxima	Arg-UCU-1-1	0.420384
mut	Maxima	Arg-UCU-1-1	0.404475
mut	Maxima	Arg-UCU-1-1	0.393318
mut	Maxima	Arg-UCU-1-1	0.373088
mut	TGIRT	Arg-UCU-1-1	0.147821
mut	TGIRT	Arg-UCU-1-1	0.15276
mut	TGIRT	Arg-UCU-1-1	0.13613
mut	TGIRT	Arg-UCU-1-1	0.164618
mut	TGIRT	Arg-UCU-1-1	0.125954
mut	TGIRT	Arg-UCU-1-1	0.159952
mut	TGIRT	Arg-UCU-1-1	0.165874
gap	Maxima	Arg-UCU-1-1	0.017542
gap	Maxima	Arg-UCU-1-1	0.014782
gap	Maxima	Arg-UCU-1-1	0.01585
gap	Maxima	Arg-UCU-1-1	0.014221
gap	Maxima	Arg-UCU-1-1	0.01102
gap	Maxima	Arg-UCU-1-1	0.015294
gap	Maxima	Arg-UCU-1-1	0.017597
gap	TGIRT	Arg-UCU-1-1	0.00273
gap	TGIRT	Arg-UCU-1-1	0.00092
gap	TGIRT	Arg-UCU-1-1	0.004336
gap	TGIRT	Arg-UCU-1-1	0.002991
gap	TGIRT	Arg-UCU-1-1	0.001673
gap	TGIRT	Arg-UCU-1-1	0.004131
gap	TGIRT	Arg-UCU-1-1	0.004367
RTstops	Maxima	Arg-UCU-1-1	46.4062
RTstops	Maxima	Arg-UCU-1-1	45.5739
RTstops	Maxima	Arg-UCU-1-1	47.8249
RTstops	Maxima	Arg-UCU-1-1	49.7727
RTstops	Maxima	Arg-UCU-1-1	48.542
RTstops	Maxima	Arg-UCU-1-1	44.2207
RTstops	Maxima	Arg-UCU-1-1	46.2966
RTstops	TGIRT	Arg-UCU-1-1	57.0643
RTstops	TGIRT	Arg-UCU-1-1	58.7076
RTstops	TGIRT	Arg-UCU-1-1	57.9056
RTstops	TGIRT	Arg-UCU-1-1	62.7613
RTstops	TGIRT	Arg-UCU-1-1	62.5057
RTstops	TGIRT	Arg-UCU-1-1	60.1442
RTstops	TGIRT	Arg-UCU-1-1	56.4751
mut	Maxima	Arg-UCG-3-1	0.007659
mut	Maxima	Arg-UCG-3-1	0.010954
mut	Maxima	Arg-UCG-3-1	0.006318
mut	Maxima	Arg-UCG-3-1	0.009914
mut	Maxima	Arg-UCG-3-1	0.009713
mut	Maxima	Arg-UCG-3-1	0.00998
mut	Maxima	Arg-UCG-3-1	0.007
mut	TGIRT	Arg-UCG-3-1	0.004645
mut	TGIRT	Arg-UCG-3-1	0.007386
mut	TGIRT	Arg-UCG-3-1	0.007194
mut	TGIRT	Arg-UCG-3-1	0.007172
mut	TGIRT	Arg-UCG-3-1	0.00603
mut	TGIRT	Arg-UCG-3-1	0.005745
mut	TGIRT	Arg-UCG-3-1	0.004472
gap	Maxima	Arg-UCG-3-1	0.002296
gap	Maxima	Arg-UCG-3-1	0.003222
gap	Maxima	Arg-UCG-3-1	0.002134
gap	Maxima	Arg-UCG-3-1	0.00369
gap	Maxima	Arg-UCG-3-1	0.002907
gap	Maxima	Arg-UCG-3-1	0.002792
gap	Maxima	Arg-UCG-3-1	0.00175
gap	TGIRT	Arg-UCG-3-1	0.000216
gap	TGIRT	Arg-UCG-3-1	0.000317
gap	TGIRT	Arg-UCG-3-1	0.000389
gap	TGIRT	Arg-UCG-3-1	0.000105
gap	TGIRT	Arg-UCG-3-1	9.3e-05
gap	TGIRT	Arg-UCG-3-1	0.000141
gap	TGIRT	Arg-UCG-3-1	0.000148
RTstops	Maxima	Arg-UCG-3-1	0
RTstops	Maxima	Arg-UCG-3-1	0
RTstops	Maxima	Arg-UCG-3-1	0
RTstops	Maxima	Arg-UCG-3-1	0
RTstops	Maxima	Arg-UCG-3-1	0
RTstops	Maxima	Arg-UCG-3-1	0
RTstops	Maxima	Arg-UCG-3-1	0
RTstops	TGIRT	Arg-UCG-3-1	0
RTstops	TGIRT	Arg-UCG-3-1	0
RTstops	TGIRT	Arg-UCG-3-1	0
RTstops	TGIRT	Arg-UCG-3-1	0
RTstops	TGIRT	Arg-UCG-3-1	0
RTstops	TGIRT	Arg-UCG-3-1	0
RTstops	TGIRT	Arg-UCG-3-1	0
mut	Maxima	Glu-UUC-2-1	0.611056
mut	Maxima	Glu-UUC-2-1	0.622262
mut	Maxima	Glu-UUC-2-1	0.632352
mut	Maxima	Glu-UUC-2-1	0.632105
mut	Maxima	Glu-UUC-2-1	0.65184
mut	Maxima	Glu-UUC-2-1	0.611522
mut	Maxima	Glu-UUC-2-1	0.599069
mut	TGIRT	Glu-UUC-2-1	0.549193
mut	TGIRT	Glu-UUC-2-1	0.55073
mut	TGIRT	Glu-UUC-2-1	0.55959
mut	TGIRT	Glu-UUC-2-1	0.584132
mut	TGIRT	Glu-UUC-2-1	0.590573
mut	TGIRT	Glu-UUC-2-1	0.5435
mut	TGIRT	Glu-UUC-2-1	0.534096
gap	Maxima	Glu-UUC-2-1	0.181744
gap	Maxima	Glu-UUC-2-1	0.188004
gap	Maxima	Glu-UUC-2-1	0.195662
gap	Maxima	Glu-UUC-2-1	0.201025
gap	Maxima	Glu-UUC-2-1	0.187493
gap	Maxima	Glu-UUC-2-1	0.17716
gap	Maxima	Glu-UUC-2-1	0.189627
gap	TGIRT	Glu-UUC-2-1	0.040755
gap	TGIRT	Glu-UUC-2-1	0.038618
gap	TGIRT	Glu-UUC-2-1	0.038768
gap	TGIRT	Glu-UUC-2-1	0.049913
gap	TGIRT	Glu-UUC-2-1	0.038839
gap	TGIRT	Glu-UUC-2-1	0.037232
gap	TGIRT	Glu-UUC-2-1	0.041759
RTstops	Maxima	Glu-UUC-2-1	3.4171
RTstops	Maxima	Glu-UUC-2-1	3.4411
RTstops	Maxima	Glu-UUC-2-1	3.7142
RTstops	Maxima	Glu-UUC-2-1	3.39784
RTstops	Maxima	Glu-UUC-2-1	3.12588
RTstops	Maxima	Glu-UUC-2-1	3.42392
RTstops	Maxima	Glu-UUC-2-1	3.22667
RTstops	TGIRT	Glu-UUC-2-1	10.2831
RTstops	TGIRT	Glu-UUC-2-1	9.60804
RTstops	TGIRT	Glu-UUC-2-1	11.1436
RTstops	TGIRT	Glu-UUC-2-1	10.1357
RTstops	TGIRT	Glu-UUC-2-1	9.46756
RTstops	TGIRT	Glu-UUC-2-1	10.9686
RTstops	TGIRT	Glu-UUC-2-1	9.47228
