# Supplementary material for: A robust method for measuring aminoacylation through tRNA-Seq
Source: eLife. 2024 Jul 30;12:RP91554. doi: 10.7554/eLife.91554 (PMC11288633; doi:10.7554/eLife.91554)
Supplement: Figure 3—source data 1. [file elife-91554-fig3-data1.xlsx]

## Sheet: Fig3A
sample_name_unique_simple	Variable	Variable value	percent_multiple_codons
S1	frac_max_score	0.9	5.42444
S1	frac_max_score	0.95	5.53838
S1	frac_max_score	1	5.4895
S2	frac_max_score	0.9	5.44386
S2	frac_max_score	0.95	5.55703
S2	frac_max_score	1	5.51077
S3	frac_max_score	0.9	7.21158
S3	frac_max_score	0.95	7.36665
S3	frac_max_score	1	7.30434
S4	frac_max_score	0.9	4.96425
S4	frac_max_score	0.95	5.06772
S4	frac_max_score	1	5.02647
S5	frac_max_score	0.9	5.93363
S5	frac_max_score	0.95	6.06002
S5	frac_max_score	1	6.01021
S6	frac_max_score	0.9	4.97733
S6	frac_max_score	0.95	5.08223
S6	frac_max_score	1	5.04447
S7	frac_max_score	0.9	8.22817
S7	frac_max_score	0.95	8.4048
S7	frac_max_score	1	8.33004
S8	frac_max_score	0.9	7.5503
S8	frac_max_score	0.95	7.70965
S8	frac_max_score	1	7.64596
S1	min_mut_freq	0.5	6.40728
S1	min_mut_freq	0.6	6.33485
S1	min_mut_freq	0.63	5.92411
S1	min_mut_freq	0.65	4.97657
S1	min_mut_freq	0.68	5.1863
S1	min_mut_freq	0.7	4.82861
S1	min_mut_freq	0.72	4.84348
S1	min_mut_freq	0.75	5.05324
S1	min_mut_freq	0.8	5.20177
S1	min_mut_freq	0.9	5.96967
S2	min_mut_freq	0.5	6.43421
S2	min_mut_freq	0.6	6.35116
S2	min_mut_freq	0.63	5.94437
S2	min_mut_freq	0.65	4.99821
S2	min_mut_freq	0.68	5.20724
S2	min_mut_freq	0.7	4.84402
S2	min_mut_freq	0.72	4.85835
S2	min_mut_freq	0.75	5.07296
S2	min_mut_freq	0.8	5.22273
S2	min_mut_freq	0.9	5.99223
S3	min_mut_freq	0.5	8.53705
S3	min_mut_freq	0.6	8.41937
S3	min_mut_freq	0.63	7.87229
S3	min_mut_freq	0.65	6.59776
S3	min_mut_freq	0.68	6.8979
S3	min_mut_freq	0.7	6.42181
S3	min_mut_freq	0.72	6.44131
S3	min_mut_freq	0.75	6.7244
S3	min_mut_freq	0.8	6.92163
S3	min_mut_freq	0.9	7.95838
S4	min_mut_freq	0.5	5.88509
S4	min_mut_freq	0.6	5.80311
S4	min_mut_freq	0.63	5.42481
S4	min_mut_freq	0.65	4.56195
S4	min_mut_freq	0.68	4.74051
S4	min_mut_freq	0.7	4.41184
S4	min_mut_freq	0.72	4.42545
S4	min_mut_freq	0.75	4.61809
S4	min_mut_freq	0.8	4.75328
S4	min_mut_freq	0.9	5.46599
S5	min_mut_freq	0.5	7.03196
S5	min_mut_freq	0.6	6.93423
S5	min_mut_freq	0.63	6.47743
S5	min_mut_freq	0.65	5.42744
S5	min_mut_freq	0.68	5.6813
S5	min_mut_freq	0.7	5.27764
S5	min_mut_freq	0.72	5.29274
S5	min_mut_freq	0.75	5.52773
S5	min_mut_freq	0.8	5.68754
S5	min_mut_freq	0.9	6.55241
S6	min_mut_freq	0.5	5.90533
S6	min_mut_freq	0.6	5.82624
S6	min_mut_freq	0.63	5.45583
S6	min_mut_freq	0.65	4.59962
S6	min_mut_freq	0.68	4.7665
S6	min_mut_freq	0.7	4.42825
S6	min_mut_freq	0.72	4.44025
S6	min_mut_freq	0.75	4.63056
S6	min_mut_freq	0.8	4.75678
S6	min_mut_freq	0.9	5.44418
S7	min_mut_freq	0.5	9.75091
S7	min_mut_freq	0.6	9.60926
S7	min_mut_freq	0.63	8.9785
S7	min_mut_freq	0.65	7.51005
S7	min_mut_freq	0.68	7.86614
S7	min_mut_freq	0.7	7.3166
S7	min_mut_freq	0.72	7.33901
S7	min_mut_freq	0.75	7.67011
S7	min_mut_freq	0.8	7.90405
S7	min_mut_freq	0.9	9.08636
S8	min_mut_freq	0.5	8.91385
S8	min_mut_freq	0.6	8.80154
S8	min_mut_freq	0.63	8.23114
S8	min_mut_freq	0.65	6.9325
S8	min_mut_freq	0.68	7.23855
S8	min_mut_freq	0.7	6.72722
S8	min_mut_freq	0.72	6.74691
S8	min_mut_freq	0.75	7.03821
S8	min_mut_freq	0.8	7.24668
S8	min_mut_freq	0.9	8.32275
S1	iteration	1	5.58616
S1	iteration	2	5.4
S1	iteration	3	5.46921
S2	iteration	1	5.60635
S2	iteration	2	5.42016
S2	iteration	3	5.48906
S3	iteration	1	7.43061
S3	iteration	2	7.18332
S3	iteration	3	7.2744
S4	iteration	1	5.1131
S4	iteration	2	4.94362
S4	iteration	3	5.00569
S5	iteration	1	6.114
S5	iteration	2	5.91028
S5	iteration	3	5.98465
S6	iteration	1	5.12932
S6	iteration	2	4.95847
S6	iteration	3	5.02179
S7	iteration	1	8.47899
S7	iteration	2	8.19172
S7	iteration	3	8.29743
S8	iteration	1	7.77921
S8	iteration	2	7.51901
S8	iteration	3	7.61373
S1	unique_anno_float	0	5.22755
S1	unique_anno_float	1	5.7427
S2	unique_anno_float	0	5.24508
S2	unique_anno_float	1	5.7653
S3	unique_anno_float	0	6.94838
S3	unique_anno_float	1	7.64384
S4	unique_anno_float	0	4.78936
S4	unique_anno_float	1	5.25225
S5	unique_anno_float	0	5.70998
S5	unique_anno_float	1	6.29598
S6	unique_anno_float	0	4.79862
S6	unique_anno_float	1	5.27444
S7	unique_anno_float	0	7.91737
S7	unique_anno_float	1	8.72806
S8	unique_anno_float	0	7.27944
S8	unique_anno_float	1	7.9952

## Sheet: Fig3B
sample_name_unique_simple	percent_multiple_codons	Mapping_percent
S1	6.50447	99.273
S2	6.53901	99.32
S3	8.68576	98.6836
S4	5.96587	99.2935
S5	7.16392	98.8277
S6	5.99141	98.7979
S7	9.93512	99.0955
S8	9.06601	98.5665
S1	6.49427	99.273
S2	6.52819	99.32
S3	8.67134	98.6836
S4	5.95608	99.2935
S5	7.15284	98.8277
S6	5.98145	98.7979
S7	9.92021	99.0955
S8	9.05222	98.5665
S1	6.49337	99.273
S2	6.52755	99.32
S3	8.67058	98.6836
S4	5.95561	99.2935
S5	7.15215	98.8277
S6	5.98086	98.7979
S7	9.9193	99.0955
S8	9.05142	98.5665
S1	6.34656	99.273
S2	6.3707	99.3197
S3	8.44636	98.6836
S4	5.8031	99.2934
S5	6.96967	98.8274
S6	5.83147	98.7979
S7	9.65544	99.0949
S8	8.83287	98.5665
S1	6.33637	99.273
S2	6.35987	99.3197
S3	8.43181	98.6836
S4	5.7933	99.2934
S5	6.95859	98.8274
S6	5.82152	98.7979
S7	9.64052	99.0949
S8	8.81907	98.5665
S1	6.33547	99.273
S2	6.35924	99.3197
S3	8.43104	98.6836
S4	5.79283	99.2934
S5	6.95791	98.8274
S6	5.82092	98.7979
S7	9.63962	99.0949
S8	8.81828	98.5665
S1	5.16367	99.2724
S2	5.19382	99.3191
S3	6.85672	98.6826
S4	4.72594	99.2931
S5	5.65805	98.8267
S6	4.76138	98.7976
S7	7.82025	99.0937
S8	7.21397	98.5648
S1	4.77589	99.2723
S2	4.81349	99.3191
S3	6.35047	98.6826
S4	4.38158	99.293
S5	5.24481	98.8267
S6	4.41534	98.7976
S7	7.23816	99.0937
S8	6.70377	98.5648
S1	4.79177	99.2722
S2	4.8318	99.3191
S3	6.37663	98.6826
S4	4.39912	99.293
S5	5.2651	98.8267
S6	4.42927	98.7975
S7	7.26211	99.0937
S8	6.72592	98.5648
S1	5.16384	99.271
S2	5.1754	99.3177
S3	6.85704	98.6798
S4	4.71453	99.2922
S5	5.63485	98.8245
S6	4.72292	98.7952
S7	7.82665	99.0928
S8	7.16485	98.5618
S1	5.16384	99.271
S2	5.1754	99.3177
S3	6.85704	98.6798
S4	4.71453	99.2922
S5	5.63485	98.8245
S6	4.72292	98.7952
S7	7.82665	99.0928
S8	7.16485	98.5618
S1	5.16384	99.271
S2	5.1754	99.3177
S3	6.85704	98.6798
S4	4.71453	99.2922
S5	5.63485	98.8245
S6	4.72292	98.7952
S7	7.82665	99.0928
S8	7.16485	98.5618
S1	5.17008	99.2706
S2	5.18101	99.3174
S3	6.86162	98.6801
S4	4.71992	99.2919
S5	5.63939	98.8239
S6	4.72734	98.7946
S7	7.83404	99.0927
S8	7.16938	98.5616
S1	5.16494	99.2706
S2	5.17631	99.3174
S3	6.85473	98.6801
S4	4.71463	99.2919
S5	5.6341	98.8239
S6	4.72236	98.7946
S7	7.82576	99.0927
S8	7.16262	98.5616
S1	5.16494	99.2706
S2	5.17631	99.3174
S3	6.85473	98.6801
S4	4.71463	99.2919
S5	5.6341	98.8239
S6	4.72236	98.7946
S7	7.82576	99.0927
S8	7.16262	98.5616
S1	5.13378	99.2698
S2	5.14583	99.3173
S3	6.81241	98.6793
S4	4.68559	99.2913
S5	5.59667	98.8236
S6	4.6959	98.7937
S7	7.78198	99.0919
S8	7.11801	98.5604
S1	5.13396	99.2698
S2	5.14619	99.3173
S3	6.81267	98.6793
S4	4.68574	99.2914
S5	5.59706	98.8236
S6	4.69615	98.7937
S7	7.78227	99.0921
S8	7.11841	98.5604
S1	5.13378	99.2698
S2	5.14592	99.3173
S3	6.81241	98.6793
S4	4.68558	99.2914
S5	5.59667	98.8236
S6	4.6959	98.7937
S7	7.78198	99.0919
S8	7.11801	98.5604
S1	6.20756	99.2274
S2	6.22733	99.2725
S3	8.26859	98.5709
S4	5.67441	99.2454
S5	6.80699	98.7401
S6	5.6503	98.7368
S7	9.45664	99.0439
S8	8.63431	98.4366
S1	6.20756	99.2274
S2	6.22733	99.2725
S3	8.26859	98.5709
S4	5.67441	99.2454
S5	6.80699	98.7401
S6	5.6503	98.7368
S7	9.45664	99.0439
S8	8.63431	98.4366
S1	6.20756	99.2274
S2	6.22733	99.2725
S3	8.26859	98.5709
S4	5.67441	99.2454
S5	6.80699	98.7401
S6	5.6503	98.7368
S7	9.45664	99.0439
S8	8.63431	98.4366
S1	6.74805	99.273
S2	6.78311	99.3202
S3	9.0196	98.6837
S4	6.18703	99.2934
S5	7.4359	98.8278
S6	6.21786	98.7979
S7	10.3144	99.0955
S8	9.40828	98.5668
S1	6.73695	99.273
S2	6.77175	99.3202
S3	9.00441	98.6837
S4	6.17676	99.2934
S5	7.42414	98.8278
S6	6.20731	98.7979
S7	10.2985	99.0955
S8	9.39356	98.5668
S1	6.73695	99.273
S2	6.77175	99.3202
S3	9.00441	98.6837
S4	6.17676	99.2934
S5	7.42414	98.8278
S6	6.20731	98.7979
S7	10.2985	99.0955
S8	9.39356	98.5668
S1	6.59997	99.273
S2	6.62346	99.3199
S3	8.79321	98.6837
S4	6.03223	99.2933
S5	7.25068	98.8275
S6	6.06526	98.7979
S7	10.0489	99.0949
S8	9.18841	98.5667
S1	6.58888	99.273
S2	6.61209	99.3199
S3	8.77789	98.6837
S4	6.02196	99.2933
S5	7.23891	98.8275
S6	6.05471	98.7979
S7	10.0329	99.0949
S8	9.17369	98.5667
S1	6.58888	99.273
S2	6.61209	99.3199
S3	8.77789	98.6837
S4	6.02196	99.2933
S5	7.23891	98.8275
S6	6.05471	98.7979
S7	10.0329	99.0949
S8	9.17369	98.5667
S1	5.41194	99.2724
S2	5.44153	99.3193
S3	7.19605	98.6827
S4	4.95176	99.293
S5	5.93407	98.8267
S6	4.99086	98.7976
S7	8.2068	99.0937
S8	7.56329	98.565
S1	5.0192	99.2723
S2	5.05687	99.3193
S3	6.6843	98.6827
S4	4.60274	99.2929
S5	5.51553	98.8267
S6	4.64119	98.7976
S7	7.61884	99.0937
S8	7.04792	98.565
S1	5.0192	99.2723
S2	5.05687	99.3193
S3	6.6843	98.6827
S4	4.60274	99.2929
S5	5.51553	98.8267
S6	4.64119	98.7976
S7	7.61884	99.0937
S8	7.04792	98.565
S1	5.41924	99.271
S2	5.42898	99.318
S3	7.20327	98.6799
S4	4.94659	99.2921
S5	5.91803	98.8245
S6	4.95773	98.7952
S7	8.22179	99.0928
S8	7.52134	98.562
S1	5.41924	99.271
S2	5.42898	99.318
S3	7.20327	98.6799
S4	4.94659	99.2921
S5	5.91803	98.8245
S6	4.95773	98.7952
S7	8.22179	99.0928
S8	7.52134	98.562
S1	5.41924	99.271
S2	5.42898	99.318
S3	7.20327	98.6799
S4	4.94659	99.2921
S5	5.91803	98.8245
S6	4.95773	98.7952
S7	8.22179	99.0928
S8	7.52134	98.562
S1	5.43062	99.2706
S2	5.4391	99.3176
S3	7.21397	98.6802
S4	4.9564	99.2918
S5	5.92786	98.8239
S6	4.96654	98.7945
S7	8.23642	99.0927
S8	7.53264	98.5617
S1	5.42025	99.2706
S2	5.42999	99.3176
S3	7.20082	98.6802
S4	4.94669	99.2918
S5	5.91728	98.8239
S6	4.95726	98.7945
S7	8.2209	99.0927
S8	7.51924	98.5617
S1	5.42025	99.2706
S2	5.42999	99.3176
S3	7.20082	98.6802
S4	4.94669	99.2918
S5	5.91728	98.8239
S6	4.95726	98.7945
S7	8.2209	99.0927
S8	7.51924	98.5617
S1	5.39441	99.2698
S2	5.40393	99.3174
S3	7.16489	98.6794
S4	4.92215	99.2912
S5	5.88514	98.8236
S6	4.93527	98.7936
S7	8.18451	99.0919
S8	7.48127	98.5605
S1	5.39459	99.2698
S2	5.40429	99.3174
S3	7.16515	98.6794
S4	4.9223	99.2914
S5	5.88554	98.8236
S6	4.93552	98.7937
S7	8.1848	99.0921
S8	7.48166	98.5605
S1	5.39441	99.2698
S2	5.40402	99.3174
S3	7.16489	98.6794
S4	4.92215	99.2914
S5	5.88514	98.8236
S6	4.93527	98.7937
S7	8.18451	99.0919
S8	7.48127	98.5605
S1	6.21957	99.2271
S2	6.23701	99.2722
S3	8.2811	98.5695
S4	5.68545	99.2445
S5	6.8193	98.7396
S6	5.65901	98.7366
S7	9.47055	99.0434
S8	8.64705	98.4352
S1	6.21957	99.2271
S2	6.23701	99.2722
S3	8.2811	98.5695
S4	5.68545	99.2445
S5	6.8193	98.7396
S6	5.65901	98.7366
S7	9.47055	99.0434
S8	8.64705	98.4352
S1	6.21957	99.2271
S2	6.23701	99.2722
S3	8.2811	98.5695
S4	5.68545	99.2445
S5	6.8193	98.7396
S6	5.65901	98.7366
S7	9.47055	99.0434
S8	8.64705	98.4352
S1	6.84598	99.273
S2	6.89316	99.3204
S3	9.16258	98.6831
S4	6.28671	99.2934
S5	7.55712	98.8269
S6	6.32668	98.7975
S7	10.4782	99.0957
S8	9.57425	98.5661
S1	6.46966	99.273
S2	6.50859	99.3204
S3	8.65212	98.6831
S4	5.93958	99.2934
S5	7.13692	98.8269
S6	5.97025	98.7975
S7	9.88795	99.0957
S8	9.03143	98.5661
S1	6.73741	99.273
S2	6.77976	99.3204
S3	9.01685	98.6831
S4	6.17795	99.2934
S5	7.42558	98.8269
S6	6.22447	98.7975
S7	10.3081	99.0957
S8	9.41511	98.5661
S1	6.62297	99.273
S2	6.65737	99.32
S3	8.83397	98.6831
S4	6.06209	99.2933
S5	7.29122	98.8266
S6	6.10158	98.7975
S7	10.0957	99.0951
S8	9.24802	98.566
S1	6.00549	99.273
S2	6.03391	99.32
S3	8.00689	98.6831
S4	5.49609	99.2933
S5	6.60618	98.8266
S6	5.52335	98.7975
S7	9.13842	99.0951
S8	8.36609	98.566
S1	6.40689	99.273
S2	6.43536	99.32
S3	8.53497	98.6831
S4	5.85002	99.2933
S5	7.03657	98.8266
S6	5.9024	98.7975
S7	9.75228	99.0951
S8	8.93291	98.566
S1	5.43611	99.2724
S2	5.47598	99.3195
S3	7.23846	98.6821
S4	4.98256	99.293
S5	5.9748	98.8259
S6	5.02768	98.7972
S7	8.25485	99.0939
S8	7.62315	98.5643
S1	4.43744	99.2723
S2	4.48031	99.3195
S3	5.9166	98.6821
S4	4.07884	99.2929
S5	4.88503	98.8259
S6	4.11286	98.7972
S7	6.72656	99.0939
S8	6.24281	98.5643
S1	4.73856	99.2723
S2	4.78505	99.3195
S3	6.32268	98.6821
S4	4.34668	99.2929
S5	5.20702	98.8259
S6	4.39653	98.7972
S7	7.19597	99.0939
S8	6.67026	98.5643
S1	5.43836	99.271
S2	5.45495	99.3182
S3	7.22909	98.6793
S4	4.97084	99.2921
S5	5.94994	98.8236
S6	4.99388	98.7947
S7	8.25688	99.093
S8	7.56793	98.5614
S1	4.92728	99.271
S2	4.94172	99.3182
S3	6.55091	98.6793
S4	4.50397	99.2921
S5	5.3922	98.8236
S6	4.52637	98.7947
S7	7.46147	99.093
S8	6.84154	98.5614
S1	4.96065	99.271
S2	4.97528	99.3182
S3	6.59226	98.6793
S4	4.53343	99.2921
S5	5.42553	98.8236
S6	4.55582	98.7947
S7	7.51073	99.093
S8	6.88544	98.5614
S1	5.44974	99.2706
S2	5.46489	99.3178
S3	7.24005	98.6796
S4	4.98041	99.2918
S5	5.95977	98.8231
S6	5.00244	98.7941
S7	8.2712	99.0928
S8	7.57923	98.5612
S1	4.92938	99.2706
S2	4.94318	99.3178
S3	6.55	98.6796
S4	4.50453	99.2918
S5	5.39321	98.8231
S6	4.52648	98.7941
S7	7.46088	99.0928
S8	6.84089	98.5612
S1	4.96274	99.2706
S2	4.97674	99.3178
S3	6.59135	98.6796
S4	4.53399	99.2918
S5	5.42654	98.8231
S6	4.55594	98.7941
S7	7.51014	99.0928
S8	6.88479	98.5612
S1	5.41345	99.2696
S2	5.43027	99.3174
S3	7.19111	98.6787
S4	4.94609	99.2912
S5	5.91754	98.8228
S6	4.97108	98.7932
S7	8.21899	99.0921
S8	7.52827	98.5599
S1	4.92318	99.2702
S2	4.93679	99.3176
S3	6.54174	98.6791
S4	4.49681	99.2915
S5	5.3829	98.8234
S6	4.52337	98.7938
S7	7.45627	99.0921
S8	6.82702	98.5604
S1	5.02202	99.2702
S2	5.0353	99.3176
S3	6.66515	98.6791
S4	4.5878	99.2915
S5	5.48475	98.8234
S6	4.6114	98.7938
S7	7.60224	99.0921
S8	6.95395	98.5604
S1	7.47711	99.2271
S2	7.49228	99.2722
S3	9.96285	98.5695
S4	6.83686	99.2446
S5	8.18696	98.7396
S6	6.84397	98.7366
S7	11.3913	99.0434
S8	10.4043	98.4353
S1	6.62783	99.2271
S2	6.63296	99.2722
S3	8.82282	98.5695
S4	6.05913	99.2446
S5	7.25262	98.7396
S6	6.05011	98.7366
S7	10.065	99.0434
S8	9.19005	98.4353
S1	6.62783	99.2271
S2	6.63296	99.2722
S3	8.82282	98.5695
S4	6.05913	99.2446
S5	7.25262	98.7396
S6	6.05011	98.7366
S7	10.065	99.0434
S8	9.19005	98.4353
S1	6.16335	99.2724
S2	6.17852	99.32
S3	8.18129	98.6837
S4	5.66829	99.2931
S5	6.73193	98.8267
S6	5.67562	98.7973
S7	9.33286	99.0939
S8	8.54487	98.5659
S1	6.16317	99.2724
S2	6.17834	99.3201
S3	8.18091	98.6837
S4	5.66805	99.2931
S5	6.73144	98.8267
S6	5.6752	98.7972
S7	9.33271	99.0939
S8	8.54421	98.5659
S1	6.16317	99.2724
S2	6.17834	99.3201
S3	8.18091	98.6837
S4	5.66805	99.2931
S5	6.73144	98.8267
S6	5.6752	98.7972
S7	9.33271	99.0939
S8	8.54421	98.5659
S1	6.26517	99.2722
S2	6.27119	99.3197
S3	8.30565	98.683
S4	5.75036	99.293
S5	6.82948	98.8264
S6	5.76171	98.7972
S7	9.46821	99.0931
S8	8.68006	98.5654
S1	6.26499	99.2722
S2	6.27101	99.3197
S3	8.30527	98.683
S4	5.75012	99.293
S5	6.82899	98.8264
S6	5.7613	98.7972
S7	9.46806	99.0931
S8	8.6794	98.5654
S1	6.26499	99.2722
S2	6.27101	99.3197
S3	8.30527	98.683
S4	5.75012	99.293
S5	6.82899	98.8264
S6	5.7613	98.7972
S7	9.46806	99.0931
S8	8.6794	98.5654
S1	5.0029	99.272
S2	5.00733	99.3195
S3	6.60369	98.6821
S4	4.58379	99.2927
S5	5.41611	98.8256
S6	4.62028	98.7972
S7	7.51048	99.0924
S8	6.91787	98.5642
S1	5.0029	99.272
S2	5.00733	99.3195
S3	6.60369	98.6821
S4	4.58371	99.2928
S5	5.41611	98.8256
S6	4.62027	98.7973
S7	7.51048	99.0924
S8	6.91774	98.5642
S1	5.0029	99.272
S2	5.00733	99.3195
S3	6.60369	98.6821
S4	4.58379	99.2927
S5	5.41611	98.8256
S6	4.62028	98.7972
S7	7.51048	99.0924
S8	6.91787	98.5642
S1	4.45702	99.2701
S2	4.47507	99.3177
S3	5.93288	98.6788
S4	4.07331	99.2912
S5	4.87214	98.8229
S6	4.09044	98.7945
S7	6.74949	99.0912
S8	6.23403	98.5605
S1	4.457	99.2705
S2	4.47505	99.3182
S3	5.93284	98.6794
S4	4.07328	99.2917
S5	4.87212	98.8233
S6	4.09042	98.7948
S7	6.74947	99.0915
S8	6.23386	98.5612
S1	4.457	99.2705
S2	4.47505	99.3182
S3	5.93284	98.6794
S4	4.07328	99.2917
S5	4.87212	98.8233
S6	4.09042	98.7948
S7	6.74947	99.0915
S8	6.23386	98.5612
S1	4.90527	99.2694
S2	4.9323	99.3171
S3	6.54054	98.6779
S4	4.48626	99.2908
S5	5.37293	98.8211
S6	4.4959	98.7928
S7	7.4583	99.091
S8	6.85816	98.559
S1	4.90012	99.2696
S2	4.92761	99.3172
S3	6.53363	98.6782
S4	4.48096	99.291
S5	5.36763	98.8211
S6	4.49092	98.7928
S7	7.45001	99.0912
S8	6.85139	98.559
S1	4.90012	99.2696
S2	4.92761	99.3172
S3	6.53363	98.6782
S4	4.48096	99.291
S5	5.36763	98.8211
S6	4.49092	98.7928
S7	7.45001	99.0912
S8	6.85139	98.559
S1	5.21163	99.2659
S2	5.24087	99.3147
S3	6.94902	98.6695
S4	4.76577	99.2878
S5	5.70679	98.8177
S6	4.75479	98.789
S7	7.93675	99.0875
S8	7.29205	98.551
S1	5.21163	99.2659
S2	5.24096	99.3147
S3	6.94901	98.6696
S4	4.76576	99.288
S5	5.7067	98.8177
S6	4.75479	98.789
S7	7.93674	99.0876
S8	7.29192	98.551
S1	5.21163	99.2659
S2	5.24096	99.3147
S3	6.94901	98.6696
S4	4.76576	99.288
S5	5.7067	98.8177
S6	4.75479	98.789
S7	7.93674	99.0876
S8	7.29192	98.551
S1	5.37682	99.2249
S2	5.40838	99.2704
S3	7.17742	98.5669
S4	4.93231	99.2426
S5	5.91563	98.7384
S6	4.90333	98.7349
S7	8.18692	99.0427
S8	7.52729	98.432
S1	5.37682	99.2249
S2	5.40838	99.2704
S3	7.17742	98.5669
S4	4.93223	99.2426
S5	5.91563	98.7384
S6	4.90333	98.7349
S7	8.18692	99.0427
S8	7.52729	98.432
S1	5.37682	99.2249
S2	5.40838	99.2704
S3	7.17742	98.5669
S4	4.93223	99.2426
S5	5.91563	98.7384
S6	4.90333	98.7349
S7	8.18692	99.0427
S8	7.52729	98.432
S1	6.16289	99.2724
S2	6.17807	99.3201
S3	8.18101	98.684
S4	5.66806	99.293
S5	6.73135	98.8266
S6	5.67503	98.7972
S7	9.33223	99.0942
S8	8.54396	98.5658
S1	6.16271	99.2724
S2	6.17789	99.3201
S3	8.18063	98.684
S4	5.66782	99.293
S5	6.73085	98.8266
S6	5.67462	98.7972
S7	9.33208	99.0942
S8	8.54329	98.5658
S1	6.16271	99.2724
S2	6.17789	99.3201
S3	8.18063	98.684
S4	5.66782	99.293
S5	6.73085	98.8266
S6	5.67462	98.7972
S7	9.33208	99.0942
S8	8.54329	98.5658
S1	6.26472	99.2722
S2	6.27065	99.3198
S3	8.3055	98.6832
S4	5.7502	99.2929
S5	6.8291	98.8263
S6	5.76121	98.7972
S7	9.46758	99.0934
S8	8.67926	98.5654
S1	6.26454	99.2722
S2	6.27047	99.3198
S3	8.30512	98.6832
S4	5.74997	99.2929
S5	6.82861	98.8263
S6	5.7608	98.7971
S7	9.46743	99.0934
S8	8.67847	98.5654
S1	6.26454	99.2722
S2	6.27047	99.3198
S3	8.30512	98.6832
S4	5.74997	99.2929
S5	6.82861	98.8263
S6	5.7608	98.7971
S7	9.46743	99.0934
S8	8.67847	98.5654
S1	5.00263	99.272
S2	5.00669	99.3196
S3	6.60355	98.6823
S4	4.58364	99.2926
S5	5.41572	98.8255
S6	4.61969	98.7972
S7	7.51	99.0927
S8	6.91708	98.5642
S1	5.00245	99.272
S2	5.00642	99.3196
S3	6.60316	98.6823
S4	4.58364	99.2927
S5	5.41562	98.8255
S6	4.61944	98.7972
S7	7.51	99.0927
S8	6.91668	98.5642
S1	5.00245	99.272
S2	5.00642	99.3196
S3	6.60316	98.6823
S4	4.58372	99.2926
S5	5.41562	98.8255
S6	4.61944	98.7971
S7	7.51	99.0927
S8	6.91681	98.5642
S1	4.45675	99.2701
S2	4.47443	99.3178
S3	5.93261	98.6791
S4	4.07315	99.2911
S5	4.87175	98.8228
S6	4.08985	98.7944
S7	6.74902	99.0915
S8	6.23324	98.5605
S1	4.45674	99.2703
S2	4.47443	99.3179
S3	5.93259	98.6793
S4	4.07315	99.2913
S5	4.87175	98.8228
S6	4.08985	98.7945
S7	6.74901	99.0916
S8	6.23324	98.5605
S1	4.45674	99.2703
S2	4.47443	99.3179
S3	5.93259	98.6793
S4	4.07315	99.2913
S5	4.87175	98.8228
S6	4.08985	98.7945
S7	6.74901	99.0916
S8	6.23324	98.5605
S1	4.905	99.2694
S2	4.93167	99.3171
S3	6.5404	98.6782
S4	4.4861	99.2907
S5	5.37254	98.821
S6	4.4954	98.7927
S7	7.45783	99.0913
S8	6.85736	98.559
S1	4.89985	99.2696
S2	4.92698	99.3172
S3	6.53349	98.6784
S4	4.4808	99.2909
S5	5.36725	98.821
S6	4.49042	98.7927
S7	7.44953	99.0915
S8	6.8506	98.559
S1	4.89985	99.2696
S2	4.92698	99.3172
S3	6.53349	98.6784
S4	4.4808	99.2909
S5	5.36725	98.821
S6	4.49042	98.7927
S7	7.44953	99.0915
S8	6.8506	98.559
S1	5.21136	99.2659
S2	5.24033	99.3147
S3	6.94862	98.6697
S4	4.76561	99.2877
S5	5.70641	98.8176
S6	4.75428	98.7889
S7	7.93627	99.0878
S8	7.29139	98.551
S1	5.21136	99.2659
S2	5.24042	99.3147
S3	6.94862	98.6697
S4	4.76561	99.2879
S5	5.70631	98.8176
S6	4.75428	98.7889
S7	7.93629	99.0876
S8	7.29125	98.551
S1	5.21136	99.2659
S2	5.24042	99.3147
S3	6.94862	98.6697
S4	4.76561	99.2879
S5	5.70631	98.8176
S6	4.75428	98.7889
S7	7.93629	99.0876
S8	7.29125	98.551
S1	5.37682	99.2249
S2	5.40829	99.2704
S3	7.17742	98.5669
S4	4.93239	99.2426
S5	5.91563	98.7384
S6	4.90333	98.7349
S7	8.18692	99.0427
S8	7.52729	98.432
S1	5.37682	99.2249
S2	5.40829	99.2704
S3	7.17742	98.5669
S4	4.93231	99.2426
S5	5.91563	98.7384
S6	4.90333	98.7349
S7	8.18692	99.0427
S8	7.52729	98.432
S1	5.37682	99.2249
S2	5.40829	99.2704
S3	7.17742	98.5669
S4	4.93231	99.2426
S5	5.91563	98.7384
S6	4.90333	98.7349
S7	8.18692	99.0427
S8	7.52729	98.432
S1	6.16289	99.2724
S2	6.17807	99.3201
S3	8.18101	98.684
S4	5.66806	99.293
S5	6.73146	98.8264
S6	5.67503	98.7973
S7	9.33223	99.0942
S8	8.54409	98.5658
S1	6.16271	99.2724
S2	6.17789	99.3201
S3	8.18063	98.684
S4	5.66782	99.293
S5	6.73097	98.8264
S6	5.67461	98.7972
S7	9.33208	99.0942
S8	8.54343	98.5658
S1	6.16271	99.2724
S2	6.17789	99.3201
S3	8.18063	98.684
S4	5.66782	99.293
S5	6.73097	98.8264
S6	5.67461	98.7972
S7	9.33208	99.0942
S8	8.54343	98.5658
S1	6.26355	99.2722
S2	6.26884	99.3198
S3	8.3041	98.6832
S4	5.74886	99.2929
S5	6.82784	98.826
S6	5.76019	98.7972
S7	9.46547	99.0934
S8	8.67741	98.5654
S1	6.26337	99.2722
S2	6.26866	99.3198
S3	8.30372	98.6832
S4	5.74863	99.2929
S5	6.82735	98.826
S6	5.75978	98.7972
S7	9.46532	99.0934
S8	8.67674	98.5654
S1	6.26337	99.2722
S2	6.26866	99.3198
S3	8.30372	98.6832
S4	5.74863	99.2929
S5	6.82735	98.826
S6	5.75978	98.7972
S7	9.46532	99.0934
S8	8.67674	98.5654
S1	5.00272	99.272
S2	5.0066	99.3196
S3	6.6038	98.6823
S4	4.58403	99.2927
S5	5.41613	98.8252
S6	4.61985	98.7972
S7	7.51	99.0927
S8	6.91694	98.5642
S1	5.00254	99.272
S2	5.00633	99.3196
S3	6.60342	98.6823
S4	4.58411	99.2927
S5	5.41603	98.8252
S6	4.6196	98.7972
S7	7.51	99.0927
S8	6.91668	98.5642
S1	5.00254	99.272
S2	5.00633	99.3196
S3	6.60342	98.6823
S4	4.58411	99.2927
S5	5.41603	98.8252
S6	4.6196	98.7972
S7	7.51	99.0927
S8	6.91668	98.5642
S1	4.45729	99.2701
S2	4.47515	99.3178
S3	5.93363	98.6791
S4	4.07418	99.2911
S5	4.87294	98.8225
S6	4.09052	98.7944
S7	6.74992	99.0915
S8	6.2339	98.5605
S1	4.45728	99.2703
S2	4.47515	99.3179
S3	5.93361	98.6793
S4	4.07417	99.2913
S5	4.87294	98.8225
S6	4.09052	98.7945
S7	6.74991	99.0916
S8	6.2339	98.5605
S1	4.45728	99.2703
S2	4.47515	99.3179
S3	5.93361	98.6793
S4	4.07417	99.2913
S5	4.87294	98.8225
S6	4.09052	98.7945
S7	6.74991	99.0916
S8	6.2339	98.5605
S1	4.90554	99.2694
S2	4.93239	99.3171
S3	6.54142	98.6782
S4	4.48713	99.2907
S5	5.37373	98.8207
S6	4.49607	98.7927
S7	7.45873	99.0913
S8	6.85816	98.559
S1	4.90039	99.2696
S2	4.9277	99.3172
S3	6.53451	98.6784
S4	4.48183	99.2909
S5	5.36844	98.8207
S6	4.49109	98.7927
S7	7.45044	99.0915
S8	6.85139	98.559
S1	4.90039	99.2696
S2	4.9277	99.3172
S3	6.53451	98.6784
S4	4.48183	99.2909
S5	5.36844	98.8207
S6	4.49109	98.7927
S7	7.45044	99.0915
S8	6.85139	98.559
S1	5.2119	99.2659
S2	5.24105	99.3147
S3	6.94964	98.6697
S4	4.76664	99.2877
S5	5.7076	98.8173
S6	4.75496	98.7889
S7	7.93718	99.0878
S8	7.29231	98.551
S1	5.2119	99.2659
S2	5.24114	99.3147
S3	6.94964	98.6697
S4	4.76663	99.2879
S5	5.7075	98.8173
S6	4.75496	98.7889
S7	7.93719	99.0876
S8	7.29218	98.551
S1	5.2119	99.266
S2	5.24114	99.3147
S3	6.94964	98.6697
S4	4.76663	99.2879
S5	5.7075	98.8173
S6	4.75496	98.7889
S7	7.9372	99.0875
S8	7.29218	98.551
S1	5.37736	99.2249
S2	5.40901	99.2704
S3	7.17844	98.5669
S4	4.93342	99.2426
S5	5.91681	98.7384
S6	4.90401	98.7349
S7	8.18782	99.0427
S8	7.52822	98.432
S1	5.37736	99.2249
S2	5.40901	99.2704
S3	7.17844	98.5669
S4	4.93334	99.2426
S5	5.91681	98.7384
S6	4.90401	98.7349
S7	8.18782	99.0427
S8	7.52822	98.432
S1	5.37736	99.2249
S2	5.40901	99.2704
S3	7.17844	98.5669
S4	4.93334	99.2426
S5	5.91681	98.7384
S6	4.90401	98.7349
S7	8.18782	99.0427
S8	7.52822	98.432
S1	6.32983	99.2722
S2	6.35585	99.3191
S3	8.42411	98.6826
S4	5.78779	99.2931
S5	6.9509	98.8266
S6	5.81724	98.7975
S7	9.63145	99.0937
S8	8.80912	98.5651
S1	5.52577	99.2722
S2	5.5673	99.3191
S3	7.3654	98.6826
S4	5.06304	99.2931
S5	6.0762	98.8266
S6	5.09688	98.7975
S7	8.4034	99.0937
S8	7.73436	98.5651
S1	6.25237	99.2722
S2	6.27872	99.3191
S3	8.30887	98.6826
S4	5.72081	99.2931
S5	6.86553	98.8266
S6	5.74161	98.7975
S7	9.49963	99.0937
S8	8.6952	98.5651
S1	5.85516	99.2714
S2	5.87823	99.3182
S3	7.77445	98.6806
S4	5.34908	99.2925
S5	6.41678	98.8255
S6	5.38196	98.7963
S7	8.88596	99.0931
S8	8.15148	98.5631
S1	5.85516	99.2714
S2	5.87823	99.3182
S3	7.77445	98.6806
S4	5.34908	99.2925
S5	6.41678	98.8255
S6	5.38196	98.7963
S7	8.88596	99.0931
S8	8.15148	98.5631
S1	5.85516	99.2714
S2	5.87823	99.3182
S3	7.77445	98.6806
S4	5.34908	99.2925
S5	6.41678	98.8255
S6	5.38196	98.7963
S7	8.88596	99.0931
S8	8.15148	98.5631
S1	5.1643	99.2707
S2	5.17533	99.3173
S3	6.8573	98.6798
S4	4.71588	99.2921
S5	5.63507	98.824
S6	4.72319	98.7948
S7	7.82636	99.0927
S8	7.165	98.5617
S1	5.1643	99.2707
S2	5.17533	99.3173
S3	6.8573	98.6798
S4	4.71588	99.2921
S5	5.63507	98.824
S6	4.72319	98.7948
S7	7.82636	99.0927
S8	7.165	98.5617
S1	5.1643	99.2707
S2	5.17533	99.3173
S3	6.8573	98.6798
S4	4.71588	99.2921
S5	5.63507	98.824
S6	4.72319	98.7948
S7	7.82636	99.0927
S8	7.165	98.5617
S1	6.58325	99.2722
S2	6.60861	99.3193
S3	8.77096	98.6827
S4	6.01693	99.293
S5	7.23191	98.8267
S6	6.05103	98.7975
S7	10.0249	99.0937
S8	9.16467	98.5652
S1	5.76538	99.2722
S2	5.80743	99.3193
S3	7.69643	98.6827
S4	5.28017	99.293
S5	6.3428	98.8267
S6	5.3202	98.7975
S7	8.77971	99.0937
S8	8.07691	98.5652
S1	6.50253	99.2722
S2	6.52859	99.3193
S3	8.651	98.6827
S4	5.94742	99.293
S5	7.14272	98.8267
S6	5.97253	98.7975
S7	9.89041	99.0937
S8	9.04942	98.5652
S1	6.11056	99.2714
S2	6.1318	99.3184
S3	8.12067	98.6807
S4	5.58121	99.2924
S5	6.69996	98.8255
S6	5.61677	98.7962
S7	9.28111	99.0931
S8	8.50797	98.5633
S1	6.11056	99.2714
S2	6.1318	99.3184
S3	8.12067	98.6807
S4	5.58121	99.2924
S5	6.69996	98.8255
S6	5.61677	98.7962
S7	9.28111	99.0931
S8	8.50797	98.5633
S1	6.11056	99.2714
S2	6.1318	99.3184
S3	8.12067	98.6807
S4	5.58121	99.2924
S5	6.69996	98.8255
S6	5.61677	98.7962
S7	9.28111	99.0931
S8	8.50797	98.5633
S1	5.41961	99.2707
S2	5.4289	99.3176
S3	7.20352	98.6799
S4	4.94794	99.292
S5	5.91825	98.824
S6	4.95809	98.7947
S7	8.2215	99.0927
S8	7.52149	98.5618
S1	5.41961	99.2707
S2	5.4289	99.3176
S3	7.20352	98.6799
S4	4.94794	99.292
S5	5.91825	98.824
S6	4.95809	98.7947
S7	8.2215	99.0927
S8	7.52149	98.5618
S1	5.41961	99.2707
S2	5.4289	99.3176
S3	7.20352	98.6799
S4	4.94794	99.292
S5	5.91825	98.824
S6	4.95809	98.7947
S7	8.2215	99.0927
S8	7.52149	98.5618
S1	6.84598	99.273
S2	6.89316	99.3204
S3	9.16258	98.6831
S4	6.28671	99.2934
S5	7.55712	98.8269
S6	6.32668	98.7975
S7	10.4782	99.0957
S8	9.57425	98.5661
S1	6.46966	99.273
S2	6.50859	99.3204
S3	8.65212	98.6831
S4	5.93958	99.2934
S5	7.13692	98.8269
S6	5.97025	98.7975
S7	9.88795	99.0957
S8	9.03143	98.5661
S1	6.73741	99.273
S2	6.77976	99.3204
S3	9.01685	98.6831
S4	6.17795	99.2934
S5	7.42558	98.8269
S6	6.22447	98.7975
S7	10.3081	99.0957
S8	9.41511	98.5661
S1	6.62297	99.273
S2	6.65737	99.32
S3	8.83397	98.6831
S4	6.06209	99.2933
S5	7.29122	98.8266
S6	6.10158	98.7975
S7	10.0957	99.0951
S8	9.24802	98.566
S1	6.00549	99.273
S2	6.03391	99.32
S3	8.00689	98.6831
S4	5.49609	99.2933
S5	6.60618	98.8266
S6	5.52335	98.7975
S7	9.13842	99.0951
S8	8.36609	98.566
S1	6.40689	99.273
S2	6.43536	99.32
S3	8.53497	98.6831
S4	5.85002	99.2933
S5	7.03657	98.8266
S6	5.9024	98.7975
S7	9.75228	99.0951
S8	8.93291	98.566
S1	6.60724	99.2722
S2	6.64306	99.3195
S3	8.81339	98.6821
S4	6.04773	99.293
S5	7.27265	98.8259
S6	6.08785	98.7971
S7	10.073	99.0939
S8	9.22454	98.5646
S1	5.18343	99.2722
S2	5.23088	99.3195
S3	6.92873	98.6821
S4	4.75628	99.293
S5	5.7123	98.8259
S6	4.79187	98.7971
S7	7.88743	99.0939
S8	7.27181	98.5646
S1	6.22125	99.2722
S2	6.25578	99.3195
S3	8.28888	98.6821
S4	5.69073	99.293
S5	6.83363	98.8259
S6	5.72737	98.7971
S7	9.46663	99.0939
S8	8.67071	98.5646
S1	5.43611	99.2724
S2	5.47598	99.3195
S3	7.23846	98.6821
S4	4.98256	99.293
S5	5.9748	98.8259
S6	5.02768	98.7972
S7	8.25485	99.0939
S8	7.62315	98.5643
S1	4.43744	99.2723
S2	4.48031	99.3195
S3	5.9166	98.6821
S4	4.07884	99.2929
S5	4.88503	98.8259
S6	4.11286	98.7972
S7	6.72656	99.0939
S8	6.24281	98.5643
S1	4.73856	99.2723
S2	4.78505	99.3195
S3	6.32268	98.6821
S4	4.34668	99.2929
S5	5.20702	98.8259
S6	4.39653	98.7972
S7	7.19597	99.0939
S8	6.67026	98.5643
S1	6.13473	99.2714
S2	6.16643	99.3186
S3	8.16309	98.6801
S4	5.61202	99.2924
S5	6.7407	98.8246
S6	5.65359	98.7958
S7	9.32915	99.0933
S8	8.56784	98.5626
S1	5.52879	99.2714
S2	5.55542	99.3186
S3	7.35296	98.6801
S4	5.05724	99.2924
S5	6.06946	98.8246
S6	5.08844	98.7958
S7	8.38882	99.0933
S8	7.70299	98.5626
S1	5.82991	99.2714
S2	5.86016	99.3186
S3	7.75904	98.6801
S4	5.32507	99.2924
S5	6.39145	98.8246
S6	5.37211	98.7958
S7	8.85823	99.0933
S8	8.13044	98.5626
S1	5.43836	99.271
S2	5.45495	99.3182
S3	7.22909	98.6793
S4	4.97084	99.2921
S5	5.94994	98.8236
S6	4.99388	98.7947
S7	8.25688	99.093
S8	7.56793	98.5614
S1	4.92728	99.271
S2	4.94172	99.3182
S3	6.55091	98.6793
S4	4.50397	99.2921
S5	5.3922	98.8236
S6	4.52637	98.7947
S7	7.46147	99.093
S8	6.84154	98.5614
S1	4.96065	99.271
S2	4.97528	99.3182
S3	6.59226	98.6793
S4	4.53343	99.2921
S5	5.42553	98.8236
S6	4.55582	98.7947
S7	7.51073	99.093
S8	6.88544	98.5614
S1	5.43873	99.2707
S2	5.45488	99.3178
S3	7.22948	98.6793
S4	4.97203	99.292
S5	5.95016	98.8232
S6	4.99424	98.7943
S7	8.25659	99.0928
S8	7.56808	98.5613
S1	4.92766	99.2707
S2	4.94165	99.3178
S3	6.55117	98.6793
S4	4.50516	99.292
S5	5.39242	98.8232
S6	4.52672	98.7943
S7	7.46118	99.0928
S8	6.84168	98.5613
S1	4.96103	99.2707
S2	4.97521	99.3178
S3	6.59252	98.6793
S4	4.5347	99.292
S5	5.42575	98.8232
S6	4.55618	98.7943
S7	7.51044	99.0928
S8	6.88558	98.5613
S1	5.44974	99.2706
S2	5.46489	99.3178
S3	7.24005	98.6796
S4	4.98041	99.2918
S5	5.95977	98.8231
S6	5.00244	98.7941
S7	8.2712	99.0928
S8	7.57923	98.5612
S1	4.92938	99.2706
S2	4.94318	99.3178
S3	6.55	98.6796
S4	4.50453	99.2918
S5	5.39321	98.8231
S6	4.52648	98.7941
S7	7.46088	99.0928
S8	6.84089	98.5612
S1	4.96274	99.2706
S2	4.97674	99.3178
S3	6.59135	98.6796
S4	4.53399	99.2918
S5	5.42654	98.8231
S6	4.55594	98.7941
S7	7.51014	99.0928
S8	6.88479	98.5612
S1	5.41345	99.2696
S2	5.43027	99.3174
S3	7.19111	98.6787
S4	4.94609	99.2912
S5	5.91754	98.8228
S6	4.97108	98.7932
S7	8.21899	99.0921
S8	7.52827	98.5599
S1	4.92318	99.2702
S2	4.93679	99.3176
S3	6.54174	98.6791
S4	4.49681	99.2915
S5	5.3829	98.8234
S6	4.52337	98.7938
S7	7.45627	99.0921
S8	6.82702	98.5604
S1	5.02202	99.2702
S2	5.0353	99.3176
S3	6.66515	98.6791
S4	4.5878	99.2915
S5	5.48475	98.8234
S6	4.6114	98.7938
S7	7.60224	99.0921
S8	6.95395	98.5604
S1	7.47711	99.2271
S2	7.49228	99.2722
S3	9.96285	98.5695
S4	6.83686	99.2446
S5	8.18696	98.7396
S6	6.84397	98.7366
S7	11.3913	99.0434
S8	10.4043	98.4353
S1	6.62783	99.2271
S2	6.63296	99.2722
S3	8.82282	98.5695
S4	6.05913	99.2446
S5	7.25262	98.7396
S6	6.05011	98.7366
S7	10.065	99.0434
S8	9.19005	98.4353
S1	6.62783	99.2271
S2	6.63296	99.2722
S3	8.82282	98.5695
S4	6.05913	99.2446
S5	7.25262	98.7396
S6	6.05011	98.7366
S7	10.065	99.0434
S8	9.19005	98.4353
S1	5.74837	99.2717
S2	5.75502	99.3193
S3	7.61519	98.6821
S4	5.26652	99.2928
S5	6.24966	98.8256
S6	5.29515	98.7972
S7	8.67226	99.0924
S8	7.95273	98.5642
S1	5.73493	99.2717
S2	5.74194	99.3193
S3	7.59758	98.6821
S4	5.25452	99.2928
S5	6.23397	98.8256
S6	5.28401	98.7971
S7	8.65388	99.0924
S8	7.93243	98.5643
S1	5.73493	99.2717
S2	5.74194	99.3193
S3	7.59758	98.6821
S4	5.25452	99.2928
S5	6.23397	98.8256
S6	5.28401	98.7971
S7	8.65388	99.0924
S8	7.93243	98.5643
S1	4.43851	99.2705
S2	4.45629	99.3181
S3	5.90921	98.6798
S4	4.05859	99.2917
S5	4.85435	98.8239
S6	4.07495	98.7956
S7	6.72159	99.0916
S8	6.21102	98.5617
S1	4.4412	99.2708
S2	4.45844	99.3184
S3	5.91212	98.6802
S4	4.06095	99.2921
S5	4.85786	98.8243
S6	4.07721	98.7958
S7	6.72475	99.0918
S8	6.21389	98.5624
S1	4.4412	99.2708
S2	4.45844	99.3184
S3	5.91212	98.6802
S4	4.06095	99.2921
S5	4.85786	98.8243
S6	4.07721	98.7958
S7	6.72475	99.0918
S8	6.21403	98.5624
S1	4.45595	99.2697
S2	4.47418	99.3173
S3	5.93186	98.6788
S4	4.07252	99.291
S5	4.87109	98.8224
S6	4.08944	98.7941
S7	6.74785	99.091
S8	6.23247	98.5601
S1	4.45593	99.2702
S2	4.47416	99.3178
S3	5.93182	98.6794
S4	4.0725	99.2916
S5	4.87107	98.8228
S6	4.08943	98.7944
S7	6.74783	99.0913
S8	6.23241	98.561
S1	4.45593	99.2702
S2	4.47416	99.3178
S3	5.93182	98.6794
S4	4.0725	99.2916
S5	4.87107	98.8228
S6	4.08943	98.7944
S7	6.74783	99.0913
S8	6.23241	98.561
S1	5.74792	99.2717
S2	5.75447	99.3194
S3	7.61504	98.6823
S4	5.26637	99.2927
S5	6.24927	98.8255
S6	5.29465	98.7971
S7	8.67163	99.0927
S8	7.9518	98.5642
S1	5.73808	99.2718
S2	5.74499	99.3196
S3	7.60432	98.6823
S4	5.25784	99.2927
S5	6.23819	98.8255
S6	5.28723	98.797
S7	8.65988	99.0927
S8	7.93706	98.5644
S1	5.73808	99.2718
S2	5.74499	99.3196
S3	7.60432	98.6823
S4	5.25784	99.2927
S5	6.23819	98.8255
S6	5.28723	98.797
S7	8.65988	99.0927
S8	7.93706	98.5644
S1	4.43824	99.2705
S2	4.45565	99.3182
S3	5.90894	98.6801
S4	4.05844	99.2917
S5	4.85396	98.8238
S6	4.07436	98.7955
S7	6.72112	99.0919
S8	6.21022	98.5617
S1	4.44094	99.2705
S2	4.45791	99.3182
S3	5.91187	98.6801
S4	4.06081	99.2917
S5	4.85749	98.8238
S6	4.07664	98.7955
S7	6.72428	99.0919
S8	6.21314	98.5617
S1	4.44094	99.2705
S2	4.45791	99.3182
S3	5.91187	98.6801
S4	4.06081	99.2917
S5	4.85749	98.8238
S6	4.07664	98.7955
S7	6.72428	99.0919
S8	6.21327	98.5617
S1	4.45568	99.2697
S2	4.47355	99.3174
S3	5.93158	98.6791
S4	4.07237	99.291
S5	4.8707	98.8223
S6	4.08885	98.794
S7	6.74737	99.0913
S8	6.23167	98.5601
S1	4.45567	99.2699
S2	4.47354	99.3175
S3	5.93157	98.6793
S4	4.07236	99.2911
S5	4.8707	98.8223
S6	4.08885	98.7941
S7	6.74736	99.0915
S8	6.23166	98.5604
S1	4.45567	99.2699
S2	4.47354	99.3175
S3	5.93157	98.6793
S4	4.07236	99.2911
S5	4.8707	98.8223
S6	4.08885	98.7941
S7	6.74736	99.0915
S8	6.23166	98.5604
S1	6.16289	99.2724
S2	6.17807	99.3201
S3	8.18101	98.684
S4	5.66806	99.293
S5	6.73146	98.8264
S6	5.67503	98.7973
S7	9.33223	99.0942
S8	8.54409	98.5658
S1	6.16271	99.2724
S2	6.17789	99.3201
S3	8.18063	98.684
S4	5.66782	99.293
S5	6.73097	98.8264
S6	5.67461	98.7972
S7	9.33208	99.0942
S8	8.54343	98.5658
S1	6.16271	99.2724
S2	6.17789	99.3201
S3	8.18063	98.684
S4	5.66782	99.293
S5	6.73097	98.8264
S6	5.67461	98.7972
S7	9.33208	99.0942
S8	8.54343	98.5658
S1	6.26355	99.2722
S2	6.26884	99.3198
S3	8.3041	98.6832
S4	5.74886	99.2929
S5	6.82784	98.826
S6	5.76019	98.7972
S7	9.46547	99.0934
S8	8.67741	98.5654
S1	6.26337	99.2722
S2	6.26866	99.3198
S3	8.30372	98.6832
S4	5.74863	99.2929
S5	6.82735	98.826
S6	5.75978	98.7972
S7	9.46532	99.0934
S8	8.67674	98.5654
S1	6.26337	99.2722
S2	6.26866	99.3198
S3	8.30372	98.6832
S4	5.74863	99.2929
S5	6.82735	98.826
S6	5.75978	98.7972
S7	9.46532	99.0934
S8	8.67674	98.5654
S1	5.74674	99.2717
S2	5.75267	99.3194
S3	7.61364	98.6823
S4	5.26502	99.2928
S5	6.24802	98.8252
S6	5.29363	98.7972
S7	8.66952	99.0927
S8	7.94994	98.5642
S1	5.73691	99.2718
S2	5.74319	99.3196
S3	7.60292	98.6823
S4	5.25649	99.2928
S5	6.23694	98.8252
S6	5.28621	98.7971
S7	8.65777	99.0927
S8	7.9352	98.5644
S1	5.73691	99.2718
S2	5.74319	99.3196
S3	7.60292	98.6823
S4	5.25649	99.2928
S5	6.23694	98.8252
S6	5.28621	98.7971
S7	8.65777	99.0927
S8	7.9352	98.5644
S1	5.00272	99.272
S2	5.0066	99.3196
S3	6.6038	98.6823
S4	4.58403	99.2927
S5	5.41613	98.8252
S6	4.61985	98.7972
S7	7.51	99.0927
S8	6.91694	98.5642
S1	5.00254	99.272
S2	5.00633	99.3196
S3	6.60342	98.6823
S4	4.58411	99.2927
S5	5.41603	98.8252
S6	4.6196	98.7972
S7	7.51	99.0927
S8	6.91668	98.5642
S1	5.00254	99.272
S2	5.00633	99.3196
S3	6.60342	98.6823
S4	4.58411	99.2927
S5	5.41603	98.8252
S6	4.6196	98.7972
S7	7.51	99.0927
S8	6.91668	98.5642
S1	4.43878	99.2705
S2	4.45637	99.3182
S3	5.90996	98.6801
S4	4.05954	99.2917
S5	4.85515	98.8235
S6	4.07503	98.7955
S7	6.72202	99.0919
S8	6.21088	98.5617
S1	4.44148	99.2705
S2	4.45863	99.3182
S3	5.91289	98.6801
S4	4.06191	99.2917
S5	4.85868	98.8235
S6	4.07731	98.7955
S7	6.72519	99.0919
S8	6.21393	98.5617
S1	4.44148	99.2705
S2	4.45863	99.3182
S3	5.91289	98.6801
S4	4.06191	99.2917
S5	4.85868	98.8235
S6	4.07731	98.7955
S7	6.72519	99.0919
S8	6.21393	98.5617
S1	4.45729	99.2701
S2	4.47515	99.3178
S3	5.93363	98.6791
S4	4.07418	99.2911
S5	4.87294	98.8225
S6	4.09052	98.7944
S7	6.74992	99.0915
S8	6.2339	98.5605
S1	4.45728	99.2703
S2	4.47515	99.3179
S3	5.93361	98.6793
S4	4.07417	99.2913
S5	4.87294	98.8225
S6	4.09052	98.7945
S7	6.74991	99.0916
S8	6.2339	98.5605
S1	4.45728	99.2703
S2	4.47515	99.3179
S3	5.93361	98.6793
S4	4.07417	99.2913
S5	4.87294	98.8225
S6	4.09052	98.7945
S7	6.74991	99.0916
S8	6.2339	98.5605
S1	4.45622	99.2697
S2	4.47427	99.3174
S3	5.93261	98.6791
S4	4.0734	99.291
S5	4.87189	98.822
S6	4.08953	98.794
S7	6.74828	99.0913
S8	6.23247	98.5601
S1	4.45621	99.2699
S2	4.47426	99.3175
S3	5.93259	98.6793
S4	4.07339	99.2911
S5	4.87189	98.822
S6	4.08953	98.7941
S7	6.74827	99.0915
S8	6.23245	98.5604
S1	4.45621	99.2699
S2	4.47426	99.3175
S3	5.93259	98.6793
S4	4.07339	99.2911
S5	4.87189	98.822
S6	4.08953	98.7941
S7	6.74827	99.0915
S8	6.23245	98.5604
S1	4.90554	99.2694
S2	4.93239	99.3171
S3	6.54142	98.6782
S4	4.48713	99.2907
S5	5.37373	98.8207
S6	4.49607	98.7927
S7	7.45873	99.0913
S8	6.85816	98.559
S1	4.90039	99.2696
S2	4.9277	99.3172
S3	6.53451	98.6784
S4	4.48183	99.2909
S5	5.36844	98.8207
S6	4.49109	98.7927
S7	7.45044	99.0915
S8	6.85139	98.559
S1	4.90039	99.2696
S2	4.9277	99.3172
S3	6.53451	98.6784
S4	4.48183	99.2909
S5	5.36844	98.8207
S6	4.49109	98.7927
S7	7.45044	99.0915
S8	6.85139	98.559
S1	5.2119	99.2659
S2	5.24105	99.3147
S3	6.94964	98.6697
S4	4.76664	99.2877
S5	5.7076	98.8173
S6	4.75496	98.7889
S7	7.93718	99.0878
S8	7.29231	98.551
S1	5.2119	99.2659
S2	5.24114	99.3147
S3	6.94964	98.6697
S4	4.76663	99.2879
S5	5.7075	98.8173
S6	4.75496	98.7889
S7	7.93719	99.0876
S8	7.29218	98.551
S1	5.2119	99.266
S2	5.24114	99.3147
S3	6.94964	98.6697
S4	4.76663	99.2879
S5	5.7075	98.8173
S6	4.75496	98.7889
S7	7.9372	99.0875
S8	7.29218	98.551
S1	5.37736	99.2249
S2	5.40901	99.2704
S3	7.17844	98.5669
S4	4.93342	99.2426
S5	5.91681	98.7384
S6	4.90401	98.7349
S7	8.18782	99.0427
S8	7.52822	98.432
S1	5.37736	99.2249
S2	5.40901	99.2704
S3	7.17844	98.5669
S4	4.93334	99.2426
S5	5.91681	98.7384
S6	4.90401	98.7349
S7	8.18782	99.0427
S8	7.52822	98.432
S1	5.37736	99.2249
S2	5.40901	99.2704
S3	7.17844	98.5669
S4	4.93334	99.2426
S5	5.91681	98.7384
S6	4.90401	98.7349
S7	8.18782	99.0427
S8	7.52822	98.432

## Sheet: Fig3C
Masked	AA_codon	RPM
FALSE	Pro-CCA	10892.6
FALSE	Pro-CCG	6313.34
FALSE	Pro-CCU	601.33
FALSE	Ala-GCG	15684.4
FALSE	Val-GUU	6666.95
FALSE	Ser-UCU	206.747
FALSE	Pro-CCA	12350.4
FALSE	Pro-CCG	6810.74
FALSE	Pro-CCU	669.846
FALSE	Ala-GCG	15594.4
FALSE	Val-GUU	6810.74
FALSE	Ser-UCU	189.918
FALSE	Pro-CCA	12379.1
FALSE	Pro-CCG	7090.31
FALSE	Pro-CCU	642.098
FALSE	Ala-GCG	15440.7
FALSE	Val-GUU	6304.47
FALSE	Ser-UCU	232.396
FALSE	Pro-CCA	12057.6
FALSE	Pro-CCG	6863.98
FALSE	Pro-CCU	689.449
FALSE	Ala-GCG	14799.1
FALSE	Val-GUU	6254.38
FALSE	Ser-UCU	198.655
FALSE	Pro-CCA	11622.4
FALSE	Pro-CCG	6427.85
FALSE	Pro-CCU	623.988
FALSE	Ala-GCG	15089.5
FALSE	Val-GUU	8447.5
FALSE	Ser-UCU	214.816
FALSE	Pro-CCA	12022.4
FALSE	Pro-CCG	6912.45
FALSE	Pro-CCU	666.276
FALSE	Ala-GCG	15600.4
FALSE	Val-GUU	6356.6
FALSE	Ser-UCU	250.324
FALSE	Pro-CCA	11761.4
FALSE	Pro-CCG	6679.79
FALSE	Pro-CCU	610.444
FALSE	Ala-GCG	15422.2
FALSE	Val-GUU	6325.05
FALSE	Ser-UCU	191.155
FALSE	Pro-CCA	12661.7
FALSE	Pro-CCG	7343.24
FALSE	Pro-CCU	640.694
FALSE	Ala-GCG	15750.5
FALSE	Val-GUU	6896.69
FALSE	Ser-UCU	204.17
FALSE	Pro-CCA	11570.6
FALSE	Pro-CCG	6425.44
FALSE	Pro-CCU	637.947
FALSE	Ala-GCG	14943
FALSE	Val-GUU	8615.12
FALSE	Ser-UCU	202.153
TRUE	Pro-CCA	6840.66
TRUE	Pro-CCG	3596.76
TRUE	Pro-CCU	22651.6
TRUE	Ala-GCG	22927.5
TRUE	Val-GUU	19513.5
TRUE	Ser-UCU	6610.43
TRUE	Pro-CCA	7572.85
TRUE	Pro-CCG	3666.44
TRUE	Pro-CCU	26275.5
TRUE	Ala-GCG	22355.1
TRUE	Val-GUU	16183.3
TRUE	Ser-UCU	5973.88
TRUE	Pro-CCA	7652.49
TRUE	Pro-CCG	3881.24
TRUE	Pro-CCU	26576
TRUE	Ala-GCG	22164.9
TRUE	Val-GUU	17891.4
TRUE	Ser-UCU	6376.55
TRUE	Pro-CCA	7503.28
TRUE	Pro-CCG	3824.77
TRUE	Pro-CCU	25619.4
TRUE	Ala-GCG	21127.1
TRUE	Val-GUU	16720.5
TRUE	Ser-UCU	6516.81
TRUE	Pro-CCA	7226.49
TRUE	Pro-CCG	3598.03
TRUE	Pro-CCU	24184.3
TRUE	Ala-GCG	22214
TRUE	Val-GUU	17544.3
TRUE	Ser-UCU	5722.35
TRUE	Pro-CCA	7470.89
TRUE	Pro-CCG	3815.45
TRUE	Pro-CCU	25255.6
TRUE	Ala-GCG	22769.4
TRUE	Val-GUU	17738.6
TRUE	Ser-UCU	7186.35
TRUE	Pro-CCA	7359.4
TRUE	Pro-CCG	3738.17
TRUE	Pro-CCU	24377.1
TRUE	Ala-GCG	22329.5
TRUE	Val-GUU	17136.5
TRUE	Ser-UCU	6272.16
TRUE	Pro-CCA	7765.16
TRUE	Pro-CCG	4069
TRUE	Pro-CCU	26893.4
TRUE	Ala-GCG	22607.6
TRUE	Val-GUU	16794.3
TRUE	Ser-UCU	6124.63
TRUE	Pro-CCA	7230.23
TRUE	Pro-CCG	3666.64
TRUE	Pro-CCU	24007.7
TRUE	Ala-GCG	22074.8
TRUE	Val-GUU	18232
TRUE	Ser-UCU	6192.25
