# Supplementary material for: A robust method for measuring aminoacylation through tRNA-Seq
Source: eLife. 2024 Jul 30;12:RP91554. doi: 10.7554/eLife.91554 (PMC11288633; doi:10.7554/eLife.91554)
Supplement: Figure 4—figure supplement 1—source data 1. [file elife-91554-fig4-figsupp1-data1.xlsx]

## Sheet: Fig4S1A
charge_x	charge_y	Type	Kind
43.1343	39.9793	Transcript	Best
23.4332	23.1573	Transcript	Best
4.64819	4.81675	Transcript	Best
68.3225	68.3765	Transcript	Best
36.4579	35.2339	Transcript	Best
54.344	56.0229	Transcript	Best
54.8119	52.3228	Transcript	Best
39.5202	40.3293	Transcript	Best
88.0555	88.3587	Transcript	Best
48.1644	46.2188	Transcript	Best
58.2777	57.6641	Transcript	Best
46.0234	47.2585	Transcript	Best
66.5763	67.6289	Transcript	Best
46.2297	47.0676	Transcript	Best
13.6653	13.6017	Transcript	Best
63.1002	58.314	Transcript	Best
58.4713	58.6941	Transcript	Best
73.5023	74.6703	Transcript	Best
46.5006	46.2946	Transcript	Best
40.8586	39.5596	Transcript	Best
47.637	47.0016	Transcript	Best
44.4216	44.7747	Transcript	Best
46.4261	46.4113	Transcript	Best
45.7042	46.3112	Transcript	Best
43.7846	43.1819	Transcript	Best
45.1529	44.7143	Transcript	Best
46.1595	44.4004	Transcript	Best
46.6863	44.6468	Transcript	Best
59.3155	57.4581	Transcript	Best
45.8287	47.8477	Transcript	Best
45.0655	43.3934	Transcript	Best
46.2323	44.7751	Transcript	Best
44.8858	43.2484	Transcript	Best
45.8075	46.4222	Transcript	Best
51.1697	49.1872	Transcript	Best
22.878	22.6867	Transcript	Best
25.5077	26.0188	Transcript	Best
21.5749	22.5153	Transcript	Best
23.7362	24.2904	Transcript	Best
24.1526	25.3229	Transcript	Best
19.9716	22.5161	Transcript	Best
25.1702	26.5191	Transcript	Best
20.161	19.829	Transcript	Best
22.5234	24.6998	Transcript	Best
20.6823	21.7343	Transcript	Best
21.8139	20.8497	Transcript	Best
19.9362	19.8291	Transcript	Best
22.5736	22.9011	Transcript	Best
21.7364	22.3832	Transcript	Best
19.2657	19.4166	Transcript	Best
2.69791	3.57271	Transcript	Best
2.8869	2.74284	Transcript	Best
3.28812	2.53001	Transcript	Best
1.81713	2.17202	Transcript	Best
65.9696	65.4433	Transcript	Best
69.4928	69.7515	Transcript	Best
32.3704	33.8964	Transcript	Best
33.6839	33.5591	Transcript	Best
33.2675	33.3888	Transcript	Best
34.6429	35.5036	Transcript	Best
46.3415	46.1017	Transcript	Best
33.9815	34.1196	Transcript	Best
56.943	56.7411	Transcript	Best
48.9542	48.7624	Transcript	Best
46.4656	45.5295	Transcript	Best
46.9333	47.6024	Transcript	Best
64.1812	63.7864	Transcript	Best
70.4682	69.3115	Transcript	Best
65.2508	62.4556	Transcript	Best
61.4408	59.5035	Transcript	Best
65.3498	63.8312	Transcript	Best
64.4961	64.0235	Transcript	Best
65.4365	64.558	Transcript	Best
43.4465	41.788	Transcript	Best
88.1681	86.9053	Transcript	Best
87.6431	87.4988	Transcript	Best
86.3885	85.6303	Transcript	Best
88.5143	87.6571	Transcript	Best
87.5305	87.3291	Transcript	Best
57.3993	56.5166	Transcript	Best
53.2586	53.3563	Transcript	Best
53.05	51.9974	Transcript	Best
52.6529	51.2213	Transcript	Best
54.9147	54.1703	Transcript	Best
59.0169	58.4683	Transcript	Best
58.6497	58.0225	Transcript	Best
49.5197	48.4299	Transcript	Best
51.8767	52.0984	Transcript	Best
57.1851	57.9349	Transcript	Best
54.0352	53.7146	Transcript	Best
51.3738	54.0502	Transcript	Best
49.5562	50.6993	Transcript	Best
49.3984	49.9932	Transcript	Best
54.9011	54.4992	Transcript	Best
44.0574	46.3	Transcript	Best
46.4134	46.8884	Transcript	Best
46.5867	46.6559	Transcript	Best
48.8794	49.2657	Transcript	Best
50.3853	50.1416	Transcript	Best
56.8721	57.2407	Transcript	Best
51.0976	52.4068	Transcript	Best
46.9743	48.9355	Transcript	Best
8.69853	7.82648	Transcript	Best
9.08853	9.29007	Transcript	Best
8.41281	9.00092	Transcript	Best
9.28457	8.9422	Transcript	Best
8.96379	8.81974	Transcript	Best
9.1555	8.4666	Transcript	Best
55.9362	53.7789	Transcript	Best
52.2195	52.6799	Transcript	Best
52.1918	50.1903	Transcript	Best
52.8125	55.1385	Transcript	Best
52.6775	51.4207	Transcript	Best
52.9309	52.7505	Transcript	Best
53.3153	53.8243	Transcript	Best
53.5079	54.229	Transcript	Best
55.1665	55.76	Transcript	Best
54.6898	54.0844	Transcript	Best
74.2493	73.316	Transcript	Best
70.4941	70.5307	Transcript	Best
71.3084	72.1198	Transcript	Best
73.7789	71.5874	Transcript	Best
71.4619	72.081	Transcript	Best
71.8664	72.5389	Transcript	Best
73.5635	73.3908	Transcript	Best
72.2167	67.4544	Transcript	Best
74.3997	71.3954	Transcript	Best
63.147	63.6974	Transcript	Best
62.871	64.7635	Transcript	Best
63.9346	64.7034	Transcript	Best
84.9335	84.5074	Transcript	Best
85.1317	86.1375	Transcript	Best
91.2033	88.4978	Transcript	Best
85.6631	85.5881	Transcript	Best
81.9843	83.8184	Transcript	Best
86.5042	86.6101	Transcript	Best
86.1111	85.5479	Transcript	Best
86.9933	86.9362	Transcript	Best
44.8791	44.3845	Transcript	Best
43.8095	39.3651	Transcript	Worst
24.6839	23.97	Transcript	Worst
4.14424	5.36166	Transcript	Worst
70.742	68.9446	Transcript	Worst
38.7603	36.389	Transcript	Worst
60.1687	54.9938	Transcript	Worst
55.8645	54.1477	Transcript	Worst
41.0398	36.9061	Transcript	Worst
89.0311	86.5079	Transcript	Worst
50	44.174	Transcript	Worst
59.3264	52.2635	Transcript	Worst
48.7391	44.8902	Transcript	Worst
70.1927	66.4788	Transcript	Worst
47.3752	43.1862	Transcript	Worst
14.8511	13.0271	Transcript	Worst
64.2303	58.5029	Transcript	Worst
61.3298	57.8548	Transcript	Worst
75.3065	73.5136	Transcript	Worst
46.3586	44.4531	Transcript	Worst
41.2355	36.7933	Transcript	Worst
49.7782	43.9654	Transcript	Worst
48.985	42.3957	Transcript	Worst
49.8839	41.7615	Transcript	Worst
49.5369	44.3231	Transcript	Worst
46.2862	40.8922	Transcript	Worst
49.2384	44.2582	Transcript	Worst
48.8232	41.9929	Transcript	Worst
49.4559	43.1962	Transcript	Worst
63.6023	57.2544	Transcript	Worst
48.1394	44.243	Transcript	Worst
50.6349	42.2299	Transcript	Worst
49.4067	42.8781	Transcript	Worst
46.6474	41.0318	Transcript	Worst
50.4776	43.6925	Transcript	Worst
50.2	49.0944	Transcript	Worst
26.8148	20.0738	Transcript	Worst
28.1596	23.3563	Transcript	Worst
22.9945	19.5757	Transcript	Worst
26.7018	21.8323	Transcript	Worst
28.0719	21.5597	Transcript	Worst
22.0388	20.4579	Transcript	Worst
28.8966	22.8245	Transcript	Worst
23.5098	21.407	Transcript	Worst
27.4169	22.1563	Transcript	Worst
21.269	19.6036	Transcript	Worst
22.7584	20.6467	Transcript	Worst
20.7943	19.1695	Transcript	Worst
25.2665	21.6696	Transcript	Worst
24.3339	22.4202	Transcript	Worst
20.9425	18.8187	Transcript	Worst
4.46104	3.33721	Transcript	Worst
3.31813	2.84693	Transcript	Worst
2.99213	2.44038	Transcript	Worst
3.05538	2.35183	Transcript	Worst
66.0622	64.5049	Transcript	Worst
71.1124	69.1355	Transcript	Worst
35.9958	25.1694	Transcript	Worst
37.8763	27.4329	Transcript	Worst
37.709	27.219	Transcript	Worst
40.9629	28.7326	Transcript	Worst
50.2276	36.7722	Transcript	Worst
35.8621	25.5973	Transcript	Worst
62.2616	54.3063	Transcript	Worst
52.3542	48.8526	Transcript	Worst
49.325	43.5785	Transcript	Worst
52.4535	45.3181	Transcript	Worst
67.5594	62.316	Transcript	Worst
71.8271	66.7688	Transcript	Worst
68.4958	59.8363	Transcript	Worst
64.5561	57.4892	Transcript	Worst
68.4108	62.0582	Transcript	Worst
68.1939	62.0225	Transcript	Worst
67.7281	62.0549	Transcript	Worst
47.3081	39.2215	Transcript	Worst
87.4587	85.4265	Transcript	Worst
87.4369	86.2828	Transcript	Worst
86.6767	84.9416	Transcript	Worst
87.6187	88.2301	Transcript	Worst
89.2761	86.4	Transcript	Worst
57.7434	56.6442	Transcript	Worst
55.1585	53.1595	Transcript	Worst
56.2618	50.148	Transcript	Worst
53.5701	50.4227	Transcript	Worst
54.8976	51.3999	Transcript	Worst
62.4378	56.7748	Transcript	Worst
60.9142	54.8485	Transcript	Worst
53.2348	46.7298	Transcript	Worst
57.474	51.2163	Transcript	Worst
61.0405	56.4426	Transcript	Worst
56.1442	53.1791	Transcript	Worst
55.6965	52.9455	Transcript	Worst
51.8192	47.5952	Transcript	Worst
50.7823	46.5646	Transcript	Worst
53.6149	49.3354	Transcript	Worst
51.0723	45.1546	Transcript	Worst
49.2968	45.2018	Transcript	Worst
50	47.0866	Transcript	Worst
53.5569	47.4428	Transcript	Worst
54.2275	48.3068	Transcript	Worst
59.8948	51.5538	Transcript	Worst
54.023	48.8746	Transcript	Worst
51.3766	46.3215	Transcript	Worst
9.0309	7.36643	Transcript	Worst
9.84674	8.19995	Transcript	Worst
9.60904	8.6581	Transcript	Worst
9.28463	8.8358	Transcript	Worst
9.17208	7.6331	Transcript	Worst
9.49951	7.76437	Transcript	Worst
55.632	55.8522	Transcript	Worst
53.3747	52.5887	Transcript	Worst
54.5916	48.644	Transcript	Worst
57.2316	52.4123	Transcript	Worst
55.8874	51.1432	Transcript	Worst
56.9501	52.373	Transcript	Worst
56.9456	52.1529	Transcript	Worst
56.3412	51.0663	Transcript	Worst
57.5286	53.2308	Transcript	Worst
55.897	51.1146	Transcript	Worst
77.2547	67.6269	Transcript	Worst
75.5669	64.5458	Transcript	Worst
76.7582	67.7599	Transcript	Worst
74.3159	62.7149	Transcript	Worst
76.6318	64.4179	Transcript	Worst
76.0941	65.3089	Transcript	Worst
73.8804	64.7887	Transcript	Worst
75.6938	67.1272	Transcript	Worst
74.2627	64.9809	Transcript	Worst
76.1348	64.9396	Transcript	Worst
65.4095	61.5128	Transcript	Worst
64.95	60.1248	Transcript	Worst
63.4711	62.0485	Transcript	Worst
86.1339	80.779	Transcript	Worst
85.7614	81.9682	Transcript	Worst
90.0148	87.3533	Transcript	Worst
86.6384	82.4507	Transcript	Worst
83.9969	79.84	Transcript	Worst
85.8306	84.2266	Transcript	Worst
86.6256	84.0411	Transcript	Worst
87.9591	85.4085	Transcript	Worst
46.9802	42.7726	Transcript	Worst
46.578	47.0326	Codon	Best
46.0234	47.2585	Codon	Best
2.95846	2.96088	Codon	Best
4.64819	4.81675	Codon	Best
49.5518	50.1931	Codon	Best
73.285	71.2108	Codon	Best
63.1002	58.314	Codon	Best
72.8693	71.5425	Codon	Best
74.8618	74.0094	Codon	Best
21.3329	21.8993	Codon	Best
53.6036	53.5705	Codon	Best
22.5173	23.5524	Codon	Best
87.382	87.0057	Codon	Best
88.0555	88.3587	Codon	Best
52.6163	52.5212	Codon	Best
66.5763	67.6289	Codon	Best
45.0553	44.6475	Codon	Best
86.9837	86.6487	Codon	Best
35.8314	36.1379	Codon	Best
36.4579	35.2339	Codon	Best
43.5276	42.0064	Codon	Best
39.5202	40.3293	Codon	Best
34.077	34.1096	Codon	Best
8.92128	8.63046	Codon	Best
13.6653	13.6017	Codon	Best
8.73329	8.97436	Codon	Best
8.80865	8.22722	Codon	Best
21.0921	21.6025	Codon	Best
23.4332	23.1573	Codon	Best
22.7249	23.4556	Codon	Best
24.388	24.4865	Codon	Best
53.8688	54.8573	Codon	Best
48.1644	46.2188	Codon	Best
58.9481	58.382	Codon	Best
54.6735	54.9332	Codon	Best
48.9807	48.2984	Codon	Best
54.344	56.0229	Codon	Best
68.4139	69.0579	Codon	Best
68.3225	68.3765	Codon	Best
57.2451	56.9981	Codon	Best
46.0122	45.3846	Codon	Best
43.1343	39.9793	Codon	Best
48.1758	46.6984	Codon	Best
44.9961	44.5754	Codon	Best
64.5272	63.546	Codon	Best
54.8119	52.3228	Codon	Best
63.2779	60.9314	Codon	Best
67.3534	66.812	Codon	Best
86.7807	86.1538	Codon	Best
73.5023	74.6703	Codon	Best
85.3666	85.5217	Codon	Best
85.6197	85.4318	Codon	Best
54.6676	54.6334	Codon	Best
55.4336	54.8731	Codon	Best
52.7005	52.123	Codon	Best
54.0261	53.3827	Codon	Best
58.4713	58.6941	Codon	Best
32.2619	31.8134	Codon	Best
63.4346	64.0169	Codon	Best
50.5245	49.7709	Codon	Best
58.2777	57.6641	Codon	Best
47.5824	49.2811	Codon	Best
46.2297	47.0676	Codon	Best
54.3006	54.6221	Codon	Best
50.3286	46.1774	Codon	Worst
48.7391	44.8902	Codon	Worst
3.64399	2.87125	Codon	Worst
4.14424	5.36166	Codon	Worst
51.2465	47.6409	Codon	Worst
75.0136	66.0061	Codon	Worst
64.2303	58.5029	Codon	Worst
76.47	64.0722	Codon	Worst
78.1485	68.2477	Codon	Worst
23.4189	21.1567	Codon	Worst
57.5819	52.3253	Codon	Worst
25.8156	21.606	Codon	Worst
89.0501	85.8972	Codon	Worst
89.0311	86.5079	Codon	Worst
55.8961	49.2164	Codon	Worst
70.1927	66.4788	Codon	Worst
47.2208	43.1583	Codon	Worst
86.9538	85.5147	Codon	Worst
39.3847	30.4682	Codon	Worst
38.7603	36.389	Codon	Worst
47.4122	39.5251	Codon	Worst
41.0398	36.9061	Codon	Worst
38.7109	28.0474	Codon	Worst
9.43438	7.57437	Codon	Worst
14.8511	13.0271	Codon	Worst
9.47399	8.7133	Codon	Worst
9.25066	7.58818	Codon	Worst
23.009	20.3067	Codon	Worst
24.6839	23.97	Codon	Worst
24.9694	20.795	Codon	Worst
27.764	21.8341	Codon	Worst
57.2416	53.8551	Codon	Worst
50	44.174	Codon	Worst
62.1105	56.3912	Codon	Worst
56.5192	54.6499	Codon	Worst
52.6063	48.0294	Codon	Worst
60.1687	54.9938	Codon	Worst
70.2014	68.1551	Codon	Worst
70.742	68.9446	Codon	Worst
62.5728	54.8363	Codon	Worst
49.1069	43.1854	Codon	Worst
43.8095	39.3651	Codon	Worst
51.6138	45.3365	Codon	Worst
47.3649	41.9006	Codon	Worst
67.4862	61.6986	Codon	Worst
55.8645	54.1477	Codon	Worst
66.4703	58.628	Codon	Worst
69.8646	64.6836	Codon	Worst
87.5077	84.9746	Codon	Worst
75.3065	73.5136	Codon	Worst
86.2002	82.4534	Codon	Worst
86.7583	82.4787	Codon	Worst
56.7509	54.4967	Codon	Worst
56.9808	52.8207	Codon	Worst
55.5071	49.8524	Codon	Worst
55.4491	54.2551	Codon	Worst
61.3298	57.8548	Codon	Worst
35.3066	26.112	Codon	Worst
64.4385	62.56	Codon	Worst
54.7133	48.6212	Codon	Worst
59.3264	52.2635	Codon	Worst
51.9148	46.9528	Codon	Worst
47.3752	43.1862	Codon	Worst
56.4664	52.2258	Codon	Worst

## Sheet: Fig4S1B
RPM_x	RPM_y	Type	Kind
1113.52	1205.35	Transcript	Best
1478.78	1791.16	Transcript	Best
930.262	1035.48	Transcript	Best
2032.37	2184	Transcript	Best
1196.59	1247.19	Transcript	Best
2889.08	2740.45	Transcript	Best
1667.75	1627.54	Transcript	Best
1832.62	1964.16	Transcript	Best
1860.52	1994.76	Transcript	Best
1264.45	1275.92	Transcript	Best
2188.37	2352.62	Transcript	Best
2279.68	2368.86	Transcript	Best
2428.7	2646.15	Transcript	Best
1969.59	2266.43	Transcript	Best
3929.04	4377.36	Transcript	Best
1358.3	1343.37	Transcript	Best
2471.19	2792.29	Transcript	Best
6709.68	7323.91	Transcript	Best
2623.38	2647.4	Transcript	Best
4858.67	4888.85	Transcript	Best
10352.1	9595.96	Transcript	Best
5103.44	5157.4	Transcript	Best
5705.23	5637.04	Transcript	Best
1808.53	1741.83	Transcript	Best
10899.3	10928.7	Transcript	Best
4975.35	4870.12	Transcript	Best
9787.73	9714.63	Transcript	Best
3607.54	3546.1	Transcript	Best
3837.73	3940.18	Transcript	Best
2620.21	2865.99	Transcript	Best
1313.91	1392.71	Transcript	Best
8175.15	8358.14	Transcript	Best
4629.12	4785.18	Transcript	Best
4657.65	4635.29	Transcript	Best
1128.74	1244.07	Transcript	Best
10097.8	10360.4	Transcript	Best
7686.87	8122.69	Transcript	Best
5055.25	5157.4	Transcript	Best
5323.48	5820.66	Transcript	Best
4668.43	4511.01	Transcript	Best
2169.34	2245.2	Transcript	Best
2326.61	2231.46	Transcript	Best
3298.09	3220.72	Transcript	Best
2988	3299.41	Transcript	Best
2978.49	2998.39	Transcript	Best
3833.92	4012.63	Transcript	Best
4114.84	3902.09	Transcript	Best
3939.19	3985.15	Transcript	Best
2979.76	3234.46	Transcript	Best
2578.35	2807.28	Transcript	Best
2567.57	2734.21	Transcript	Best
6638.03	7248.97	Transcript	Best
3413.5	3471.78	Transcript	Best
1582.14	1657.51	Transcript	Best
1769.21	1786.79	Transcript	Best
17136.6	16973.6	Transcript	Best
3351.99	2869.11	Transcript	Best
2005.74	1713.1	Transcript	Best
14500.5	13876.5	Transcript	Best
2834.54	2618.05	Transcript	Best
1495.9	1454.54	Transcript	Best
1292.98	1209.72	Transcript	Best
18215.9	18106.5	Transcript	Best
8489.04	8331.91	Transcript	Best
12518.9	12222.1	Transcript	Best
3279.7	3176.38	Transcript	Best
6087.6	6196	Transcript	Best
9594.95	9363.01	Transcript	Best
15117.6	14669.1	Transcript	Best
15642.6	15449.7	Transcript	Best
4820.62	4608.44	Transcript	Best
15360.4	15140	Transcript	Best
6154.82	6177.27	Transcript	Best
21609.7	21854.9	Transcript	Best
2548.55	2526.86	Transcript	Best
8610.79	8006.53	Transcript	Best
4625.31	4361.75	Transcript	Best
1150.94	1074.2	Transcript	Best
2363.39	2325.14	Transcript	Best
1540.92	1457.66	Transcript	Best
6483.3	6543.87	Transcript	Best
1717.21	1809.9	Transcript	Best
1423.61	1505.75	Transcript	Best
2013.98	2074.08	Transcript	Best
16404.2	16857.4	Transcript	Best
4296.83	4302.41	Transcript	Best
3506.08	3568.59	Transcript	Best
1305.03	1285.29	Transcript	Best
1775.55	1706.85	Transcript	Best
3013.36	2865.36	Transcript	Best
2310.12	2193.99	Transcript	Best
8587.33	8592.96	Transcript	Best
13767.5	13135.2	Transcript	Best
1327.86	1241.57	Transcript	Best
1195.33	1395.21	Transcript	Best
16666.7	17381.4	Transcript	Best
1680.43	1909.2	Transcript	Best
2890.34	2836.63	Transcript	Best
4653.85	4472.29	Transcript	Best
3924.6	3674.76	Transcript	Best
3447.11	3198.24	Transcript	Best
20074.5	19333.7	Transcript	Best
17557.7	17481.3	Transcript	Best
6602.51	6501.4	Transcript	Best
2272.71	2268.93	Transcript	Best
1322.79	1394.58	Transcript	Best
3227.06	3318.77	Transcript	Best
2804.74	2747.32	Transcript	Best
1648.09	1786.79	Transcript	Best
2717.86	2953.42	Transcript	Best
2769.86	2887.84	Transcript	Best
1766.67	1872.35	Transcript	Best
1778.09	1823.64	Transcript	Best
2508.6	2525.62	Transcript	Best
7437.02	7136.55	Transcript	Best
1395.08	1325.26	Transcript	Best
3695.05	3840.88	Transcript	Best
1313.27	1383.34	Transcript	Best
3282.87	3108.31	Transcript	Best
2227.68	2061.59	Transcript	Best
1036.16	923.686	Transcript	Best
1126.21	1154.14	Transcript	Best
3416.67	3079.58	Transcript	Best
1176.3	1099.18	Transcript	Best
1900.47	2015.37	Transcript	Best
1890.96	1838	Transcript	Best
2766.06	2801.03	Transcript	Best
1315.81	1299.66	Transcript	Best
5961.41	4654.65	Transcript	Best
1196.59	1069.83	Transcript	Best
4258.15	3953.3	Transcript	Best
7078.74	7498.78	Transcript	Best
1836.43	1889.84	Transcript	Best
999.382	1039.22	Transcript	Best
10520.1	10903.1	Transcript	Best
2450.26	2500.01	Transcript	Best
2935.37	2968.41	Transcript	Best
2297.44	2172.75	Transcript	Best
2189	2098.43	Transcript	Best
28720.2	29385.6	Transcript	Best
1089.85	1113.52	Transcript	Worst
2114.01	1478.78	Transcript	Worst
1246.89	930.262	Transcript	Worst
2113.39	2032.37	Transcript	Worst
1256.9	1196.59	Transcript	Worst
2742.77	2889.08	Transcript	Worst
1931.95	1667.75	Transcript	Worst
1802.45	1832.62	Transcript	Worst
2247.9	1860.52	Transcript	Worst
1397.66	1264.45	Transcript	Worst
2376.15	2188.37	Transcript	Worst
2534.44	2279.68	Transcript	Worst
2525.68	2428.7	Transcript	Worst
2241.01	1969.59	Transcript	Worst
4414.46	3929.04	Transcript	Worst
1430.2	1358.3	Transcript	Worst
2968	2471.19	Transcript	Worst
6377.7	6709.68	Transcript	Worst
2975.51	2623.38	Transcript	Worst
5378.56	4858.67	Transcript	Worst
10343.6	10352.1	Transcript	Worst
5463.65	5103.44	Transcript	Worst
5434.87	5705.23	Transcript	Worst
1697.97	1808.53	Transcript	Worst
12493.9	10899.3	Transcript	Worst
5159.59	4975.35	Transcript	Worst
10005.1	9787.73	Transcript	Worst
3984.65	3607.54	Transcript	Worst
3773.81	3837.73	Transcript	Worst
3420.96	2620.21	Transcript	Worst
1428.94	1313.91	Transcript	Worst
8755.1	8175.15	Transcript	Worst
5086.39	4629.12	Transcript	Worst
5194.62	4657.65	Transcript	Worst
1301.32	1128.74	Transcript	Worst
11243.9	10097.8	Transcript	Worst
8410.37	7686.87	Transcript	Worst
5003.81	5055.25	Transcript	Worst
5482.42	5323.48	Transcript	Worst
4675.98	4668.43	Transcript	Worst
2267.92	2169.34	Transcript	Worst
2177.83	2326.61	Transcript	Worst
3440.98	3298.09	Transcript	Worst
2956.11	2988	Transcript	Worst
3072.48	2978.49	Transcript	Worst
4187.98	3833.92	Transcript	Worst
4265.56	4114.84	Transcript	Worst
4355.03	3939.19	Transcript	Worst
3435.97	2979.76	Transcript	Worst
3001.78	2578.35	Transcript	Worst
3010.54	2567.57	Transcript	Worst
8279.62	6638.03	Transcript	Worst
3940.23	3413.5	Transcript	Worst
1891.91	1582.14	Transcript	Worst
1990.14	1769.21	Transcript	Worst
20355.6	17136.6	Transcript	Worst
2738.39	3351.99	Transcript	Worst
1758.03	2005.74	Transcript	Worst
14030.4	14500.5	Transcript	Worst
2566.97	2834.54	Transcript	Worst
1532.17	1495.9	Transcript	Worst
1178.07	1292.98	Transcript	Worst
19817.5	18215.9	Transcript	Worst
7712.17	8489.04	Transcript	Worst
11310.2	12518.9	Transcript	Worst
3984.03	3279.7	Transcript	Worst
5449.26	6087.6	Transcript	Worst
7346.8	9594.95	Transcript	Worst
12941.2	15117.6	Transcript	Worst
13951	15642.6	Transcript	Worst
4494.54	4820.62	Transcript	Worst
15179.1	15360.4	Transcript	Worst
5835.9	6154.82	Transcript	Worst
24766.9	21609.7	Transcript	Worst
2679.58	2548.55	Transcript	Worst
10261	8610.79	Transcript	Worst
4917.47	4625.31	Transcript	Worst
1363.25	1150.94	Transcript	Worst
2611.39	2363.39	Transcript	Worst
1438.33	1540.92	Transcript	Worst
6679.25	6483.3	Transcript	Worst
1694.84	1717.21	Transcript	Worst
1246.26	1423.61	Transcript	Worst
1895.04	2013.98	Transcript	Worst
16983.4	16404.2	Transcript	Worst
4742.92	4296.83	Transcript	Worst
3295.83	3506.08	Transcript	Worst
1253.14	1305.03	Transcript	Worst
1730.5	1775.55	Transcript	Worst
2879.79	3013.36	Transcript	Worst
2404.93	2310.12	Transcript	Worst
8311.52	8587.33	Transcript	Worst
15254.8	13767.5	Transcript	Worst
1288.18	1327.86	Transcript	Worst
1320.71	1195.33	Transcript	Worst
19188.1	16666.7	Transcript	Worst
2273.55	1680.43	Transcript	Worst
3070.6	2890.34	Transcript	Worst
4388.81	4653.85	Transcript	Worst
4022.19	3924.6	Transcript	Worst
3398.43	3447.11	Transcript	Worst
21810.2	20074.5	Transcript	Worst
16380.9	17557.7	Transcript	Worst
6244.44	6602.51	Transcript	Worst
2208.48	2272.71	Transcript	Worst
1383.9	1322.79	Transcript	Worst
3056.84	3227.06	Transcript	Worst
2685.84	2804.74	Transcript	Worst
1908.18	1648.09	Transcript	Worst
3141.3	2717.86	Transcript	Worst
2829.11	2769.86	Transcript	Worst
1961.98	1766.67	Transcript	Worst
1922.57	1778.09	Transcript	Worst
2563.84	2508.6	Transcript	Worst
8335.92	7437.02	Transcript	Worst
1676.07	1395.08	Transcript	Worst
3514.8	3695.05	Transcript	Worst
1555.32	1313.27	Transcript	Worst
3475.39	3282.87	Transcript	Worst
2413.06	2227.68	Transcript	Worst
969.104	1036.16	Transcript	Worst
1187.45	1126.21	Transcript	Worst
3171.96	3416.67	Transcript	Worst
1196.83	1176.3	Transcript	Worst
2200.35	1900.47	Transcript	Worst
1950.1	1890.96	Transcript	Worst
2714.62	2766.06	Transcript	Worst
1450.22	1315.81	Transcript	Worst
4648.45	5961.41	Transcript	Worst
1045.43	1196.59	Transcript	Worst
4012.18	4258.15	Transcript	Worst
10705.2	7078.74	Transcript	Worst
2735.26	1836.43	Transcript	Worst
1211.85	999.382	Transcript	Worst
15399.3	10520.1	Transcript	Worst
2706.49	2450.26	Transcript	Worst
3118.78	2935.37	Transcript	Worst
2608.89	2297.44	Transcript	Worst
2801.58	2189	Transcript	Worst
27261.9	28720.2	Transcript	Worst
31603.1	31095.2	Codon	Best
2460.11	2359.75	Codon	Best
29574.8	30050.4	Codon	Best
1033.32	1163.07	Codon	Best
37458.6	37416.1	Codon	Best
16680.2	15604.9	Codon	Best
1399.13	1432.04	Codon	Best
6725.39	6154.03	Codon	Best
22308.2	21453.2	Codon	Best
14389.2	15318.5	Codon	Best
22262.9	22646.8	Codon	Best
12455.2	12263.2	Codon	Best
10215.1	10548.5	Codon	Best
2117.56	2212.19	Codon	Best
19902.1	20423.4	Codon	Best
2306.75	2511.05	Codon	Best
29107.1	31090.2	Codon	Best
39443.5	39561	Codon	Best
10010.2	10022.4	Codon	Best
1218.11	1263.93	Codon	Best
23988.3	25449.2	Codon	Best
1771.23	1775.73	Codon	Best
19917.2	18984.5	Codon	Best
7652.49	7470.89	Codon	Best
4429.33	4220.16	Codon	Best
3881.24	3815.45	Codon	Best
26576	25255.6	Codon	Best
15355.9	15295.4	Codon	Best
1899.45	2031.63	Codon	Best
10940.4	10661.8	Codon	Best
19745	20585.3	Codon	Best
6754.93	6117.92	Codon	Best
1303.59	1405.27	Codon	Best
18841.2	19302.6	Codon	Best
9077.4	7785.31	Codon	Best
27500.6	27116	Codon	Best
2888.15	2765.7	Codon	Best
29415.1	29230.4	Codon	Best
2069.79	2152.42	Codon	Best
22185.6	21039.8	Codon	Best
25235.3	25055.1	Codon	Best
1054.06	1135.67	Codon	Best
22164.9	22769.4	Codon	Best
44900.5	45406.9	Codon	Best
38845.1	37381.2	Codon	Best
1819.63	1884.69	Codon	Best
28342.8	27790.3	Codon	Best
13784.5	14302.3	Codon	Best
10145.9	9934.62	Codon	Best
6648.71	6253.65	Codon	Best
21953.7	21967.5	Codon	Best
17891.4	17738.6	Codon	Best
33610	32245.2	Codon	Best
6674.48	7391.19	Codon	Best
5267.18	5254.96	Codon	Best
6376.55	7186.35	Codon	Best
2933.4	2855.36	Codon	Best
14865	13595	Codon	Best
17914.7	18122.8	Codon	Best
4580.18	5068.17	Codon	Best
2345.72	2454.39	Codon	Best
27584.8	27590.4	Codon	Best
2074.82	2186.04	Codon	Best
13562.7	14242.6	Codon	Best
30348	31095.2	Codon	Worst
2279.68	2359.75	Codon	Worst
25769.6	30050.4	Codon	Worst
930.262	1163.07	Codon	Worst
37566.9	37416.1	Codon	Worst
15316	15604.9	Codon	Worst
1358.3	1432.04	Codon	Worst
6851.09	6154.03	Codon	Worst
21988.9	21453.2	Codon	Worst
12544.9	15318.5	Codon	Worst
22345.9	22646.8	Codon	Worst
12489.1	12263.2	Codon	Worst
9478.27	10548.5	Codon	Worst
1860.52	2212.19	Codon	Worst
20567.2	20423.4	Codon	Worst
2428.7	2511.05	Codon	Worst
31829.9	31090.2	Codon	Worst
36823.7	39561	Codon	Worst
10843.5	10022.4	Codon	Worst
1196.59	1263.93	Codon	Worst
23859	25449.2	Codon	Worst
1832.62	1775.73	Codon	Worst
21948.4	18984.5	Codon	Worst
7226.49	7470.89	Codon	Worst
3929.04	4220.16	Codon	Worst
3598.03	3815.45	Codon	Worst
24184.3	25255.6	Codon	Worst
14690.8	15295.4	Codon	Worst
1478.78	2031.63	Codon	Worst
10378.7	10661.8	Codon	Worst
19547.6	20585.3	Codon	Worst
7100.94	6117.92	Codon	Worst
1264.45	1405.27	Codon	Worst
20728.9	19302.6	Codon	Worst
9965.28	7785.31	Codon	Worst
30141.3	27116	Codon	Worst
2889.08	2765.7	Codon	Worst
26347.3	29230.4	Codon	Worst
2032.37	2152.42	Codon	Worst
20058.7	21039.8	Codon	Worst
23135.4	25055.1	Codon	Worst
1113.52	1135.67	Codon	Worst
22214	22769.4	Codon	Worst
43495.3	45406.9	Codon	Worst
40507.9	37381.2	Codon	Worst
1667.75	1884.69	Codon	Worst
30800.7	27790.3	Codon	Worst
17333.8	14302.3	Codon	Worst
9591.78	9934.62	Codon	Worst
6709.68	6253.65	Codon	Worst
16672.4	21967.5	Codon	Worst
17544.3	17738.6	Codon	Worst
31271.9	32245.2	Codon	Worst
6575.25	7391.19	Codon	Worst
5071.1	5254.96	Codon	Worst
5722.35	7186.35	Codon	Worst
2471.19	2855.36	Codon	Worst
16253.3	13595	Codon	Worst
23173.5	18122.8	Codon	Worst
5125	5068.17	Codon	Worst
2188.37	2454.39	Codon	Worst
27419	27590.4	Codon	Worst
1969.59	2186.04	Codon	Worst
14974.9	14242.6	Codon	Worst
