# Supplementary material for: A robust method for measuring aminoacylation through tRNA-Seq
Source: eLife. 2024 Jul 30;12:RP91554. doi: 10.7554/eLife.91554 (PMC11288633; doi:10.7554/eLife.91554)
Supplement: Figure 4—figure supplement 2—source data 1. [file elife-91554-fig4-figsupp2-data1.xlsx]

## Sheet: Fig4S2A
barcode	charge_median_dev
l1Sp	2.22758
l2Sp	0.29028
l3Sp	-0.927464
l4Sp	2.90277
l5Sp	2.07176
l6Sp	-0.74202
l7Sp	0
l8Sp	-1.54167
l9Sp	-1.59986
l1Sp	0
l2Sp	-1.01608
l3Sp	-0.275874
l4Sp	1.25077
l5Sp	2.97502
l6Sp	0.449397
l7Sp	-0.394243
l8Sp	0.536864
l9Sp	-0.170424
l1Sp	0.0836546
l2Sp	-1.60535
l3Sp	0.252221
l4Sp	-0.420292
l5Sp	-0.388332
l6Sp	0.732865
l7Sp	-0.252845
l8Sp	0.797126
l9Sp	0
l1Sp	-0.0539906
l2Sp	-0.33734
l3Sp	0
l4Sp	2.36553
l5Sp	0.745008
l6Sp	1.40182
l7Sp	-0.87121
l8Sp	0.568084
l9Sp	-1.64546
l1Sp	0
l2Sp	-1.06343
l3Sp	-1.22403
l4Sp	2.30245
l5Sp	1.20208
l6Sp	3.14436
l7Sp	1.5354
l8Sp	-0.0688838
l9Sp	-1.68852
l1Sp	-1.67885
l2Sp	-1.78559
l3Sp	0
l4Sp	4.14584
l5Sp	2.09104
l6Sp	0.416446
l7Sp	-0.209359
l8Sp	-1.02904
l9Sp	0.272837
l1Sp	0
l2Sp	-0.425982
l3Sp	-2.48914
l4Sp	1.05255
l5Sp	1.10309
l6Sp	1.16523
l7Sp	0.719439
l8Sp	-0.664271
l9Sp	-1.663
l1Sp	-0.809101
l2Sp	-0.713845
l3Sp	0
l4Sp	0.710414
l5Sp	0.379137
l6Sp	0.110948
l7Sp	0.697069
l8Sp	-3.42326
l9Sp	-1.05524
l1Sp	0
l2Sp	-0.409232
l3Sp	0.303241
l4Sp	0.975634
l5Sp	1.32297
l6Sp	0.209692
l7Sp	-0.373955
l8Sp	-1.54755
l9Sp	-1.1249
l1Sp	0.230873
l2Sp	-0.763721
l3Sp	-1.71469
l4Sp	2.06647
l5Sp	0.801197
l6Sp	0.172229
l7Sp	-1.15315
l8Sp	-3.75955
l9Sp	0
l1Sp	1.78863
l2Sp	-1.93104
l3Sp	1.17501
l4Sp	2.83731
l5Sp	2.28747
l6Sp	0
l7Sp	-1.6234
l8Sp	-4.22558
l9Sp	-0.755908
l1Sp	-0.7088
l2Sp	-2.15799
l3Sp	0.526245
l4Sp	2.00687
l5Sp	0.733738
l6Sp	0.256811
l7Sp	0
l8Sp	-1.84206
l9Sp	-0.892366
l1Sp	-0.153821
l2Sp	0.192651
l3Sp	0.898788
l4Sp	3.46267
l5Sp	0.861511
l6Sp	0
l7Sp	-1.23543
l8Sp	-0.251327
l9Sp	-1.28098
l1Sp	1.46336
l2Sp	0
l3Sp	2.30121
l4Sp	2.60881
l5Sp	-1.14936
l6Sp	0.47735
l7Sp	-2.52282
l8Sp	-1.5802
l9Sp	-1.32924
l1Sp	0.200148
l2Sp	0
l3Sp	0.136545
l4Sp	1.38589
l5Sp	0.903868
l6Sp	-0.00534922
l7Sp	-0.388984
l8Sp	-0.438105
l9Sp	-0.596827
l1Sp	1.53667
l2Sp	1.84521
l3Sp	-3.24952
l4Sp	2.66678
l5Sp	-1.27413
l6Sp	0.997687
l7Sp	-1.28531
l8Sp	-3.06064
l9Sp	0
l1Sp	-0.222829
l2Sp	-1.74398
l3Sp	0
l4Sp	2.63571
l5Sp	1.629
l6Sp	0.539829
l7Sp	0.158608
l8Sp	-0.839301
l9Sp	-1.06732
l1Sp	-0.441697
l2Sp	-0.794208
l3Sp	0.726248
l4Sp	1.36252
l5Sp	2.13234
l6Sp	0
l7Sp	0.544807
l8Sp	-0.430389
l9Sp	-1.34158
l1Sp	1.20688
l2Sp	-1.20469
l3Sp	1.00081
l4Sp	1.06481
l5Sp	-0.33944
l6Sp	1.14302
l7Sp	0
l8Sp	-0.840679
l9Sp	-1.51132
l1Sp	1.59111
l2Sp	-0.458563
l3Sp	0.292061
l4Sp	1.96804
l5Sp	0
l6Sp	2.0224
l7Sp	-1.36359
l8Sp	-2.47415
l9Sp	-2.07175
l1Sp	3.08935
l2Sp	0
l3Sp	2.45395
l4Sp	5.2306
l5Sp	-1.83992
l6Sp	4.08361
l7Sp	-0.391838
l8Sp	-0.58223
l9Sp	-1.63324
l1Sp	0.129676
l2Sp	-0.977012
l3Sp	0.482766
l4Sp	4.69304
l5Sp	0.884222
l6Sp	-0.32205
l7Sp	-0.711482
l8Sp	-1.89625
l9Sp	0
l1Sp	1.48883
l2Sp	-2.62879
l3Sp	1.474
l4Sp	4.94666
l5Sp	-0.822973
l6Sp	1.38333
l7Sp	0
l8Sp	-3.17577
l9Sp	-1.06239
l1Sp	1.3811
l2Sp	-2.94038
l3Sp	1.98806
l4Sp	5.21372
l5Sp	-1.4962
l6Sp	2.93602
l7Sp	-2.74403
l8Sp	0
l9Sp	-3.04682
l1Sp	0.797195
l2Sp	-1.09032
l3Sp	0.194473
l4Sp	3.29871
l5Sp	-0.155697
l6Sp	1.38837
l7Sp	0
l8Sp	-2.09523
l9Sp	-0.955098
l1Sp	0.438646
l2Sp	-2.55957
l3Sp	0
l4Sp	4.52415
l5Sp	0.120159
l6Sp	1.83453
l7Sp	-2.14999
l8Sp	-0.456083
l9Sp	-1.12049
l1Sp	1.75911
l2Sp	-1.34568
l3Sp	0
l4Sp	4.42281
l5Sp	1.5717
l6Sp	1.63939
l7Sp	-0.702554
l8Sp	-2.40748
l9Sp	-0.0474544
l1Sp	1.21337
l2Sp	-0.397888
l3Sp	-0.826065
l4Sp	3.983
l5Sp	0.855802
l6Sp	1.7192
l7Sp	0
l8Sp	-2.27671
l9Sp	-1.47229
l1Sp	0.221468
l2Sp	-0.72666
l3Sp	-1.63598
l4Sp	4.50818
l5Sp	0.066988
l6Sp	2.30344
l7Sp	0
l8Sp	-1.83965
l9Sp	-1.45402
l1Sp	0.857349
l2Sp	-1.7598
l3Sp	2.87631
l4Sp	3.16804
l5Sp	1.66633
l6Sp	-0.432714
l7Sp	0
l8Sp	-0.728394
l9Sp	-1.73174
l1Sp	1.48792
l2Sp	-2.08077
l3Sp	-0.184227
l4Sp	7.05724
l5Sp	2.24688
l6Sp	2.34831
l7Sp	0
l8Sp	-1.34776
l9Sp	-1.81895
l1Sp	1.45715
l2Sp	-1.8917
l3Sp	0
l4Sp	4.63161
l5Sp	0.0392795
l6Sp	2.50112
l7Sp	-0.983615
l8Sp	-1.89701
l9Sp	-0.943846
l1Sp	1.63736
l2Sp	-1.08484
l3Sp	0
l4Sp	3.39899
l5Sp	-3.86829
l6Sp	2.86972
l7Sp	0.356306
l8Sp	-2.21663
l9Sp	-2.22622
l1Sp	0.93653
l2Sp	-0.548031
l3Sp	1.55127
l4Sp	5.60669
l5Sp	-0.631882
l6Sp	2.46227
l7Sp	0
l8Sp	-1.17838
l9Sp	-1.04632
l1Sp	1.85395
l2Sp	1.17015
l3Sp	-0.128582
l4Sp	0.884237
l5Sp	0
l6Sp	0.500919
l7Sp	-0.734873
l8Sp	-0.221387
l9Sp	-2.47221
l1Sp	0.191318
l2Sp	-2.08605
l3Sp	0
l4Sp	4.12811
l5Sp	0.0657791
l6Sp	0.0480997
l7Sp	-0.730831
l8Sp	-2.61288
l9Sp	-0.892094
l1Sp	0.151093
l2Sp	-1.99295
l3Sp	0.662117
l4Sp	2.80292
l5Sp	0.0905963
l6Sp	0
l7Sp	-1.63587
l8Sp	-2.00039
l9Sp	-2.52273
l1Sp	0
l2Sp	-1.50321
l3Sp	0.940409
l4Sp	1.41965
l5Sp	1.15288
l6Sp	0.283763
l7Sp	-0.706224
l8Sp	-1.99919
l9Sp	-2.84906
l1Sp	0
l2Sp	-0.585215
l3Sp	0.554198
l4Sp	2.96562
l5Sp	0.368884
l6Sp	0.701312
l7Sp	-1.05258
l8Sp	-1.90393
l9Sp	-0.735557
l1Sp	1.733
l2Sp	-0.146708
l3Sp	2.90329
l4Sp	5.65235
l5Sp	-0.342409
l6Sp	2.05403
l7Sp	-0.284458
l8Sp	-0.859853
l9Sp	0
l1Sp	-0.74395
l2Sp	-0.33477
l3Sp	1.80049
l4Sp	1.32318
l5Sp	1.738
l6Sp	0.972845
l7Sp	0
l8Sp	-0.257721
l9Sp	-1.8583
l1Sp	-0.287002
l2Sp	-2.20143
l3Sp	1.06181
l4Sp	3.43938
l5Sp	0.23899
l6Sp	1.85834
l7Sp	-1.94969
l8Sp	-2.63278
l9Sp	0
l1Sp	-0.290282
l2Sp	-0.663276
l3Sp	-0.622341
l4Sp	3.05845
l5Sp	0.0766377
l6Sp	1.23997
l7Sp	0
l8Sp	0.955718
l9Sp	-1.2714
l1Sp	0
l2Sp	-0.701998
l3Sp	2.1764
l4Sp	4.89358
l5Sp	3.08504
l6Sp	-0.652361
l7Sp	0.550931
l8Sp	-0.367049
l9Sp	-1.15798
l1Sp	0.121079
l2Sp	-1.19076
l3Sp	1.17308
l4Sp	0.707693
l5Sp	0
l6Sp	0.524037
l7Sp	-0.654602
l8Sp	-0.95762
l9Sp	-0.264776
l1Sp	1.15642
l2Sp	0
l3Sp	0.192252
l4Sp	2.10097
l5Sp	-0.0248447
l6Sp	1.09766
l7Sp	-0.0727446
l8Sp	-0.010762
l9Sp	-2.03876
l1Sp	0.107076
l2Sp	-1.55677
l3Sp	0
l4Sp	0.965182
l5Sp	0.139051
l6Sp	0.186388
l7Sp	-0.114561
l8Sp	-0.659691
l9Sp	-1.70459
l1Sp	0
l2Sp	0.540448
l3Sp	0.327483
l4Sp	2.69285
l5Sp	0.801754
l6Sp	-0.38006
l7Sp	-1.97899
l8Sp	-0.904009
l9Sp	-0.509154
l1Sp	-0.646753
l2Sp	0.222575
l3Sp	0
l4Sp	1.95072
l5Sp	1.72545
l6Sp	-1.1072
l7Sp	-1.14728
l8Sp	0.037071
l9Sp	-0.0366194
l1Sp	0
l2Sp	-0.52754
l3Sp	0.150873
l4Sp	1.67677
l5Sp	1.04126
l6Sp	-0.977114
l7Sp	1.21019
l8Sp	-0.446997
l9Sp	-0.755662
l1Sp	-0.687117
l2Sp	0
l3Sp	0.187688
l4Sp	1.07602
l5Sp	0.592854
l6Sp	0.7016
l7Sp	-0.335234
l8Sp	-0.0478089
l9Sp	-1.07114
l1Sp	0.0399758
l2Sp	-0.126827
l3Sp	-0.104091
l4Sp	0.471198
l5Sp	0.286337
l6Sp	0.462335
l7Sp	-0.343378
l8Sp	0
l9Sp	-0.58525
l1Sp	0.75811
l2Sp	-0.370859
l3Sp	0
l4Sp	0.462114
l5Sp	0.675519
l6Sp	0.44107
l7Sp	-0.215389
l8Sp	-0.0896345
l9Sp	-0.508553
l1Sp	-0.485499
l2Sp	0.0551176
l3Sp	-0.130607
l4Sp	0.752747
l5Sp	0.444239
l6Sp	-0.257044
l7Sp	0
l8Sp	0.0492029
l9Sp	-0.795423
l1Sp	0
l2Sp	-0.559699
l3Sp	-0.526239
l4Sp	0.0925944
l5Sp	2.92137
l6Sp	1.38475
l7Sp	0.377887
l8Sp	-1.46466
l9Sp	-2.13138
l1Sp	-0.258738
l2Sp	-0.899254
l3Sp	0
l4Sp	1.36089
l5Sp	0.585093
l6Sp	1.01338
l7Sp	0.992405
l8Sp	-0.61608
l9Sp	-1.69769
l1Sp	2.34434
l2Sp	-4.47753
l3Sp	3.87035
l4Sp	5.96974
l5Sp	-2.31089
l6Sp	3.94606
l7Sp	0
l8Sp	-4.85664
l9Sp	-1.67525
l1Sp	3.68388
l2Sp	-0.442708
l3Sp	3.55911
l4Sp	7.87628
l5Sp	-2.75956
l6Sp	4.48839
l7Sp	-0.129108
l8Sp	-2.56709
l9Sp	0
l1Sp	3.08934
l2Sp	-1.67013
l3Sp	3.21063
l4Sp	7.53085
l5Sp	0
l6Sp	4.75435
l7Sp	-0.213057
l8Sp	-2.95918
l9Sp	-1.78477
l1Sp	2.87912
l2Sp	-2.28687
l3Sp	3.7399
l4Sp	9.19921
l5Sp	-0.228225
l6Sp	5.41849
l7Sp	0
l8Sp	-3.03118
l9Sp	-0.421065
l1Sp	3.05251
l2Sp	-2.33074
l3Sp	2.81274
l4Sp	6.93866
l5Sp	-0.0190187
l6Sp	2.85415
l7Sp	0
l8Sp	-6.5168
l9Sp	-0.618308
l1Sp	2.07693
l2Sp	-4.24916
l3Sp	2.21508
l4Sp	3.95752
l5Sp	-4.14298
l6Sp	3.87976
l7Sp	0
l8Sp	-6.30728
l9Sp	-4.81935
l1Sp	0.683201
l2Sp	-1.07438
l3Sp	0.481287
l4Sp	6.00179
l5Sp	0
l6Sp	0.761761
l7Sp	-0.494906
l8Sp	-1.9535
l9Sp	-2.63481
l1Sp	-0.357735
l2Sp	0.196358
l3Sp	-0.549567
l4Sp	3.04223
l5Sp	0.719703
l6Sp	0
l7Sp	0.635072
l8Sp	-0.459377
l9Sp	-0.681498
l1Sp	0.66291
l2Sp	-1.70178
l3Sp	-0.273221
l4Sp	3.52225
l5Sp	0
l6Sp	0.500489
l7Sp	0.178398
l8Sp	-2.22428
l9Sp	-2.49633
l1Sp	-0.766323
l2Sp	0
l3Sp	-0.0972305
l4Sp	4.75388
l5Sp	1.23094
l6Sp	-0.222491
l7Sp	0.137638
l8Sp	-2.38149
l9Sp	1.23586
l1Sp	1.07589
l2Sp	-0.252585
l3Sp	0.681154
l4Sp	4.45418
l5Sp	0
l6Sp	1.36353
l7Sp	-0.531727
l8Sp	-0.789285
l9Sp	-1.64765
l1Sp	1.97792
l2Sp	-0.676473
l3Sp	0.821165
l4Sp	3.33676
l5Sp	0
l6Sp	3.03617
l7Sp	-0.426746
l8Sp	-1.72146
l9Sp	-0.353924
l1Sp	2.61708
l2Sp	0
l3Sp	-0.178063
l4Sp	5.86207
l5Sp	0.294927
l6Sp	3.4817
l7Sp	-0.617155
l8Sp	-2.79742
l9Sp	-0.383058
l1Sp	0.00496159
l2Sp	-0.680437
l3Sp	-1.93234
l4Sp	3.12025
l5Sp	0.955195
l6Sp	1.52348
l7Sp	0
l8Sp	-3.94663
l9Sp	-0.486604
l1Sp	1.60874
l2Sp	-0.794718
l3Sp	0.090172
l4Sp	4.66978
l5Sp	0
l6Sp	2.16237
l7Sp	-0.497994
l8Sp	-1.6829
l9Sp	-2.10198
l1Sp	1.12893
l2Sp	-1.829
l3Sp	0.656346
l4Sp	4.82666
l5Sp	-0.146747
l6Sp	2.01403
l7Sp	0
l8Sp	-1.3447
l9Sp	-1.06111
l1Sp	0.959829
l2Sp	-0.686786
l3Sp	0.081398
l4Sp	3.25147
l5Sp	-0.512583
l6Sp	1.66856
l7Sp	0
l8Sp	-2.42174
l9Sp	-0.565405
l1Sp	0
l2Sp	-1.93986
l3Sp	-1.65848
l4Sp	3.86161
l5Sp	1.17971
l6Sp	1.41465
l7Sp	0.759157
l8Sp	-4.22495
l9Sp	-1.58321
l1Sp	1.95077
l2Sp	-0.614623
l3Sp	0.687929
l4Sp	1.24142
l5Sp	0
l6Sp	1.75015
l7Sp	-0.433012
l8Sp	-0.790836
l9Sp	-0.990544
l1Sp	0.76983
l2Sp	-0.870777
l3Sp	0.625474
l4Sp	0.563593
l5Sp	0
l6Sp	0.849199
l7Sp	-0.156748
l8Sp	-0.590508
l9Sp	-1.35262
l1Sp	0.763063
l2Sp	-0.993524
l3Sp	0.00482572
l4Sp	1.0512
l5Sp	-0.198091
l6Sp	0.455518
l7Sp	0
l8Sp	-0.683872
l9Sp	-1.59352
l1Sp	0.895595
l2Sp	-0.128967
l3Sp	0.0383458
l4Sp	0
l5Sp	-0.637845
l6Sp	0.279813
l7Sp	-1.57752
l8Sp	0.611415
l9Sp	-1.65113
l1Sp	0.201453
l2Sp	0.498572
l3Sp	0
l4Sp	1.94708
l5Sp	-0.391603
l6Sp	0.85257
l7Sp	-1.79094
l8Sp	-0.92906
l9Sp	-0.356413
l1Sp	0.909675
l2Sp	-0.280726
l3Sp	0.0269803
l4Sp	1.25376
l5Sp	-3.06699
l6Sp	0
l7Sp	-1.70237
l8Sp	0.154631
l9Sp	-1.09055
l1Sp	0.0991435
l2Sp	-1.70468
l3Sp	0.196835
l4Sp	1.99904
l5Sp	-2.0593
l6Sp	1.71715
l7Sp	-0.666179
l8Sp	0
l9Sp	-1.93816
l1Sp	1.05252
l2Sp	-0.59908
l3Sp	0
l4Sp	4.26436
l5Sp	-2.54442
l6Sp	4.08427
l7Sp	0.366546
l8Sp	-1.84947
l9Sp	-0.127273
l1Sp	2.23022
l2Sp	-3.01343
l3Sp	0.798663
l4Sp	3.14744
l5Sp	-1.66919
l6Sp	1.44411
l7Sp	-0.784598
l8Sp	0
l9Sp	-3.00658
l1Sp	0.969096
l2Sp	-2.39651
l3Sp	0.224765
l4Sp	0.951999
l5Sp	-1.69775
l6Sp	0.138633
l7Sp	0
l8Sp	-2.54562
l9Sp	-2.07979
l1Sp	0.548627
l2Sp	-0.512549
l3Sp	0
l4Sp	3.96949
l5Sp	1.16927
l6Sp	1.91916
l7Sp	-0.289693
l8Sp	-1.69347
l9Sp	-2.14754
l1Sp	0.627249
l2Sp	-2.5149
l3Sp	0
l4Sp	2.89175
l5Sp	0.626122
l6Sp	1.09922
l7Sp	-0.893653
l8Sp	-3.17396
l9Sp	-1.62233
l1Sp	0.253429
l2Sp	-4.8083
l3Sp	-0.836412
l4Sp	3.96847
l5Sp	1.02986
l6Sp	0.488584
l7Sp	-2.48196
l8Sp	-2.53652
l9Sp	0
l1Sp	-0.148911
l2Sp	-3.58192
l3Sp	0.0728218
l4Sp	5.4484
l5Sp	3.4968
l6Sp	0
l7Sp	-1.28134
l8Sp	-0.809253
l9Sp	0.52978
l1Sp	-0.74979
l2Sp	0.817915
l3Sp	0
l4Sp	3.10557
l5Sp	-1.71106
l6Sp	1.83335
l7Sp	0.306115
l8Sp	-1.49235
l9Sp	-1.31728
l1Sp	0.00170834
l2Sp	-1.93144
l3Sp	-0.318881
l4Sp	2.11072
l5Sp	0.00235924
l6Sp	0.686982
l7Sp	-0.396391
l8Sp	-0.854437
l9Sp	0
l1Sp	-1.09255
l2Sp	0
l3Sp	1.58385
l4Sp	3.2301
l5Sp	-0.336162
l6Sp	1.89474
l7Sp	-0.260677
l8Sp	0.479122
l9Sp	-1.34007
l1Sp	0
l2Sp	-0.00241857
l3Sp	1.14313
l4Sp	2.26305
l5Sp	2.58753
l6Sp	0.621196
l7Sp	-1.05899
l8Sp	-1.96095
l9Sp	-0.0239802
l1Sp	-0.579333
l2Sp	-1.72165
l3Sp	0.0155279
l4Sp	0.804561
l5Sp	0.350417
l6Sp	1.34434
l7Sp	0
l8Sp	-3.41314
l9Sp	-2.11371
l1Sp	1.60396
l2Sp	-0.778151
l3Sp	1.20199
l4Sp	0.317754
l5Sp	0
l6Sp	0.939378
l7Sp	-0.652736
l8Sp	-3.96178
l9Sp	-3.56622
l1Sp	-1.09718
l2Sp	-2.11817
l3Sp	1.14549
l4Sp	5.91773
l5Sp	0.978418
l6Sp	-1.97894
l7Sp	0.718044
l8Sp	0
l9Sp	-0.661337
l1Sp	-0.475013
l2Sp	-0.873665
l3Sp	0
l4Sp	2.40846
l5Sp	3.59289
l6Sp	0.221476
l7Sp	-0.165997
l8Sp	-1.68659
l9Sp	0.728513
l1Sp	-0.70035
l2Sp	0.924705
l3Sp	-0.631144
l4Sp	2.71293
l5Sp	0
l6Sp	1.01205
l7Sp	-1.39407
l8Sp	-0.200452
l9Sp	0.02865
l1Sp	0
l2Sp	-2.79435
l3Sp	0.386308
l4Sp	4.67755
l5Sp	1.69268
l6Sp	1.39106
l7Sp	-0.135938
l8Sp	-1.43663
l9Sp	-0.832225
l1Sp	0.243642
l2Sp	-0.408279
l3Sp	0
l4Sp	4.0859
l5Sp	1.71108
l6Sp	0.295781
l7Sp	-0.654525
l8Sp	-1.83487
l9Sp	-0.0257753
l1Sp	4.53578
l2Sp	-0.44917
l3Sp	4.90438
l4Sp	7.55848
l5Sp	-0.545848
l6Sp	4.14159
l7Sp	0
l8Sp	-0.782576
l9Sp	-0.177563
l1Sp	0.751669
l2Sp	-0.320833
l3Sp	2.06093
l4Sp	3.67708
l5Sp	0.442483
l6Sp	0
l7Sp	-2.20465
l8Sp	-1.47131
l9Sp	-2.19014
l1Sp	-1.20738
l2Sp	-1.18785
l3Sp	0.75377
l4Sp	3.19491
l5Sp	0.00226082
l6Sp	0.312119
l7Sp	-3.00131
l8Sp	-1.86016
l9Sp	0
l1Sp	0.910094
l2Sp	-0.281593
l3Sp	0.0380371
l4Sp	1.24246
l5Sp	-0.249237
l6Sp	0
l7Sp	0.00189472
l8Sp	-0.422012
l9Sp	-0.901352
l1Sp	-0.0130667
l2Sp	-0.683757
l3Sp	0.188471
l4Sp	0.745144
l5Sp	0.21722
l6Sp	0
l7Sp	0.128186
l8Sp	-0.901645
l9Sp	-0.930132
l1Sp	-0.245285
l2Sp	-1.11093
l3Sp	0.342821
l4Sp	0.950944
l5Sp	-0.430252
l6Sp	0.572669
l7Sp	0.0776956
l8Sp	0
l9Sp	-0.608489
l1Sp	0.342363
l2Sp	0.185586
l3Sp	0
l4Sp	0.342424
l5Sp	1.0578
l6Sp	-0.281951
l7Sp	-0.10814
l8Sp	-0.106405
l9Sp	-0.924475
l1Sp	1.01812
l2Sp	0.699041
l3Sp	0.874065
l4Sp	1.22641
l5Sp	0
l6Sp	-0.0885278
l7Sp	-0.15766
l8Sp	-0.312572
l9Sp	-0.328385
l1Sp	1.1062
l2Sp	0
l3Sp	0.417307
l4Sp	1.45021
l5Sp	-0.248016
l6Sp	-0.180567
l7Sp	1.41745
l8Sp	-0.28493
l9Sp	-1.14107
l1Sp	2.07799
l2Sp	-2.51893
l3Sp	-0.0793301
l4Sp	1.77382
l5Sp	4.6012
l6Sp	-0.926895
l7Sp	0
l8Sp	1.994
l9Sp	-0.529073
l1Sp	-0.369254
l2Sp	-0.789875
l3Sp	0.0911682
l4Sp	0.785953
l5Sp	2.31204
l6Sp	-0.680937
l7Sp	0.474784
l8Sp	0
l9Sp	-1.87065
l1Sp	1.4503
l2Sp	0.777077
l3Sp	-0.551152
l4Sp	3.85016
l5Sp	0
l6Sp	0.0271335
l7Sp	-0.127924
l8Sp	-2.09751
l9Sp	-1.88637
l1Sp	-0.60227
l2Sp	-1.26324
l3Sp	1.72375
l4Sp	3.81685
l5Sp	2.1624
l6Sp	0
l7Sp	0.120281
l8Sp	-1.00249
l9Sp	-0.173473
l1Sp	0
l2Sp	-1.4934
l3Sp	-1.25682
l4Sp	3.20987
l5Sp	1.86792
l6Sp	0.569221
l7Sp	0.781812
l8Sp	-1.53433
l9Sp	-3.21583
l1Sp	0
l2Sp	-0.840564
l3Sp	-0.180351
l4Sp	4.01925
l5Sp	2.64442
l6Sp	0.192104
l7Sp	0.857583
l8Sp	-0.557881
l9Sp	-0.760783
l1Sp	0
l2Sp	-1.48557
l3Sp	0.508991
l4Sp	3.6303
l5Sp	1.30011
l6Sp	1.13875
l7Sp	-0.146469
l8Sp	-1.16238
l9Sp	-1.42582
l1Sp	0
l2Sp	-0.348303
l3Sp	0.72114
l4Sp	2.8333
l5Sp	-0.198768
l6Sp	0.5151
l7Sp	0.0621764
l8Sp	-2.44163
l9Sp	-4.06297
l1Sp	0
l2Sp	-1.07584
l3Sp	0.593528
l4Sp	2.36212
l5Sp	0.73856
l6Sp	0.73527
l7Sp	-0.792072
l8Sp	-1.93567
l9Sp	-1.05087
l1Sp	0.648009
l2Sp	-4.46227
l3Sp	0.0426523
l4Sp	1.8553
l5Sp	1.94098
l6Sp	-3.10824
l7Sp	0
l8Sp	-2.9271
l9Sp	-3.33809
l1Sp	2.9995
l2Sp	-1.67622
l3Sp	2.06621
l4Sp	6.00493
l5Sp	-2.34597
l6Sp	4.23721
l7Sp	-1.61834
l8Sp	-3.62287
l9Sp	0
l1Sp	4.63272
l2Sp	0
l3Sp	4.6693
l4Sp	9.7055
l5Sp	-0.541675
l6Sp	5.61969
l7Sp	-0.0670142
l8Sp	-1.31552
l9Sp	-0.25506
l1Sp	2.1532
l2Sp	-4.12093
l3Sp	2.96461
l4Sp	5.16068
l5Sp	-1.70048
l6Sp	4.3962
l7Sp	-2.19251
l8Sp	-6.44027
l9Sp	0
l1Sp	2.19154
l2Sp	-5.91731
l3Sp	0
l4Sp	5.0444
l5Sp	-2.97542
l6Sp	4.61338
l7Sp	0.0665734
l8Sp	-7.1695
l9Sp	-0.0511267
l1Sp	0.355176
l2Sp	-5.52143
l3Sp	0.974221
l4Sp	4.98733
l5Sp	-1.12092
l6Sp	4.02015
l7Sp	0
l8Sp	-5.79783
l9Sp	-1.28876
l1Sp	0.555566
l2Sp	-1.88118
l3Sp	1.22806
l4Sp	2.56961
l5Sp	0.264837
l6Sp	-0.388457
l7Sp	-1.28508
l8Sp	-6.52207
l9Sp	0
l1Sp	2.43103
l2Sp	-2.86986
l3Sp	2.25827
l4Sp	4.56132
l5Sp	0
l6Sp	1.42105
l7Sp	-1.58668
l8Sp	-4.0053
l9Sp	-0.301656
l1Sp	4.54619
l2Sp	-0.155077
l3Sp	-0.216187
l4Sp	6.5922
l5Sp	0.132048
l6Sp	3.59062
l7Sp	0
l8Sp	-2.68964
l9Sp	-0.141306
l1Sp	5.08971
l2Sp	0
l3Sp	2.08544
l4Sp	6.82481
l5Sp	-1.48534
l6Sp	3.83552
l7Sp	-1.82072
l8Sp	-4.37044
l9Sp	-0.189854
l1Sp	1.63418
l2Sp	-0.542671
l3Sp	2.1846
l4Sp	3.89671
l5Sp	-2.6093
l6Sp	4.34185
l7Sp	-0.80385
l8Sp	0
l9Sp	-2.42717
l1Sp	0.35158
l2Sp	0
l3Sp	2.24402
l4Sp	2.43056
l5Sp	-2.11738
l6Sp	1.88118
l7Sp	-1.42522
l8Sp	-2.39468
l9Sp	-1.76532
l1Sp	1.34492
l2Sp	0
l3Sp	2.11365
l4Sp	0.881414
l5Sp	-0.77062
l6Sp	0.933572
l7Sp	-1.40131
l8Sp	-0.541197
l9Sp	-1.47708
l1Sp	1.95157
l2Sp	-1.73234
l3Sp	1.52553
l4Sp	3.15197
l5Sp	-0.467658
l6Sp	2.42655
l7Sp	0
l8Sp	-2.20289
l9Sp	-1.7547
l1Sp	1.76532
l2Sp	-0.357741
l3Sp	2.77116
l4Sp	2.39508
l5Sp	-1.03785
l6Sp	2.81027
l7Sp	0
l8Sp	-1.39817
l9Sp	-0.295583
l1Sp	2.70551
l2Sp	0.27562
l3Sp	0
l4Sp	1.51706
l5Sp	0.190756
l6Sp	-1.46807
l7Sp	-1.46705
l8Sp	-1.14451
l9Sp	-0.0912046
l1Sp	1.63073
l2Sp	-1.00808
l3Sp	1.55579
l4Sp	2.60611
l5Sp	0
l6Sp	2.40872
l7Sp	-0.119508
l8Sp	-1.58165
l9Sp	-0.887813
l1Sp	-0.951121
l2Sp	-0.826227
l3Sp	0.882895
l4Sp	1.06142
l5Sp	1.18153
l6Sp	2.00568
l7Sp	-1.84192
l8Sp	-3.09549
l9Sp	0
l1Sp	1.87316
l2Sp	-2.09256
l3Sp	1.97904
l4Sp	1.19951
l5Sp	-0.818729
l6Sp	2.20606
l7Sp	0
l8Sp	-0.404459
l9Sp	-1.27336
l1Sp	1.57914
l2Sp	-1.61279
l3Sp	1.01595
l4Sp	2.09362
l5Sp	-0.0979038
l6Sp	1.40823
l7Sp	0
l8Sp	-0.49085
l9Sp	-0.623359
l1Sp	1.27303
l2Sp	-0.260442
l3Sp	1.21599
l4Sp	2.23881
l5Sp	-0.130622
l6Sp	0.741543
l7Sp	0
l8Sp	-0.311775
l9Sp	-0.498829
l1Sp	0.796541
l2Sp	-1.03065
l3Sp	0.301941
l4Sp	2.89767
l5Sp	0
l6Sp	0.372745
l7Sp	-0.301475
l8Sp	-1.30992
l9Sp	-1.7274

## Sheet: Fig4S2B
barcode	RPM_median_dev_p
l1Sp	-2.12594
l2Sp	11.927
l3Sp	-5.33983
l4Sp	14.1088
l5Sp	0
l6Sp	1.98875
l7Sp	-3.53343
l8Sp	-8.59007
l9Sp	8.24645
l1Sp	13.7477
l2Sp	-9.30673
l3Sp	2.20299
l4Sp	-9.23534
l5Sp	-20.4319
l6Sp	9.31492
l7Sp	0
l8Sp	0.341456
l9Sp	-3.62366
l1Sp	20.1119
l2Sp	0.559987
l3Sp	-0.460556
l4Sp	-3.85586
l5Sp	-10.3883
l6Sp	12.0375
l7Sp	0
l8Sp	1.58288
l9Sp	-0.252952
l1Sp	0.704555
l2Sp	0.851846
l3Sp	-1.37297
l4Sp	0
l5Sp	-3.15582
l6Sp	2.56445
l7Sp	-3.942
l8Sp	-3.17283
l9Sp	4.06915
l1Sp	-0.556615
l2Sp	1.57915
l3Sp	-3.62498
l4Sp	5.88275
l5Sp	-5.32749
l6Sp	0
l7Sp	3.98256
l8Sp	8.75297
l9Sp	-1.32414
l1Sp	-4.01254
l2Sp	-4.38932
l3Sp	1.07512
l4Sp	3.27667
l5Sp	1.10758
l6Sp	-3.20999
l7Sp	0
l8Sp	7.30085
l9Sp	-4.09362
l1Sp	12.4575
l2Sp	-1.44114
l3Sp	5.91918
l4Sp	-0.945898
l5Sp	-2.92149
l6Sp	9.70634
l7Sp	0
l8Sp	3.81335
l9Sp	-5.26235
l1Sp	0
l2Sp	1.17754
l3Sp	-1.73191
l4Sp	-3.65964
l5Sp	1.67417
l6Sp	-1.4823
l7Sp	-1.75527
l8Sp	6.8411
l9Sp	8.97184
l1Sp	6.15524
l2Sp	-6.42366
l3Sp	0
l4Sp	1.53907
l5Sp	-12.1381
l6Sp	4.469
l7Sp	-3.53886
l8Sp	1.33065
l9Sp	-5.79889
l1Sp	7.00371
l2Sp	-4.63056
l3Sp	-0.198013
l4Sp	0.632581
l5Sp	-3.19521
l6Sp	7.58587
l7Sp	0
l8Sp	5.14
l9Sp	-2.31656
l1Sp	1.02708
l2Sp	0
l3Sp	-0.266921
l4Sp	-0.719538
l5Sp	-6.95697
l6Sp	4.3536
l7Sp	2.31672
l8Sp	-9.90572
l9Sp	0.0265624
l1Sp	6.98983
l2Sp	-12.6425
l3Sp	3.85224
l4Sp	-0.936658
l5Sp	-3.76452
l6Sp	-0.384374
l7Sp	3.7152
l8Sp	0.208291
l9Sp	0
l1Sp	3.99296
l2Sp	-1.92649
l3Sp	-5.02135
l4Sp	-4.2796
l5Sp	0
l6Sp	3.39068
l7Sp	1.44136
l8Sp	-0.572158
l9Sp	8.95334
l1Sp	8.01033
l2Sp	-4.09717
l3Sp	0
l4Sp	-2.85975
l5Sp	-5.07137
l6Sp	5.36067
l7Sp	-0.322671
l8Sp	6.11356
l9Sp	9.23544
l1Sp	4.60417
l2Sp	-0.209623
l3Sp	4.95653
l4Sp	-7.10926
l5Sp	-6.89824
l6Sp	0
l7Sp	-3.72763
l8Sp	7.06428
l9Sp	3.72499
l1Sp	2.2201
l2Sp	-4.23322
l3Sp	0
l4Sp	-3.33588
l5Sp	-2.9187
l6Sp	2.3519
l7Sp	0.913894
l8Sp	0.242448
l9Sp	-3.98538
l1Sp	3.94477
l2Sp	-8.08762
l3Sp	2.73313
l4Sp	2.31333
l5Sp	-13.4545
l6Sp	0
l7Sp	-2.21492
l8Sp	0.131383
l9Sp	-2.20886
l1Sp	-4.07622
l2Sp	-3.58225
l3Sp	0
l4Sp	7.39711
l5Sp	0.917022
l6Sp	-5.94186
l7Sp	-6.75809
l8Sp	9.14659
l9Sp	10.1553
l1Sp	10.1967
l2Sp	0
l3Sp	6.75185
l4Sp	-1.78117
l5Sp	-2.84433
l6Sp	5.35515
l7Sp	-0.833544
l8Sp	3.49265
l9Sp	-1.95467
l1Sp	2.86897
l2Sp	-0.463796
l3Sp	3.21507
l4Sp	2.2595
l5Sp	-7.07434
l6Sp	7.18555
l7Sp	-1.25095
l8Sp	0
l9Sp	-6.49708
l1Sp	1.2831
l2Sp	-3.47155
l3Sp	0
l4Sp	-10.3139
l5Sp	1.36652
l6Sp	-1.39841
l7Sp	0.492651
l8Sp	1.50641
l9Sp	-6.03745
l1Sp	7.05808
l2Sp	-0.95469
l3Sp	0.843658
l4Sp	-5.15721
l5Sp	0
l6Sp	-0.874051
l7Sp	-1.46261
l8Sp	3.24301
l9Sp	1.05732
l1Sp	2.57281
l2Sp	-1.89875
l3Sp	-5.98947
l4Sp	-3.3475
l5Sp	7.67533
l6Sp	0
l7Sp	1.41237
l8Sp	-1.36786
l9Sp	6.3885
l1Sp	0
l2Sp	-4.66788
l3Sp	-4.38427
l4Sp	-12.4552
l5Sp	6.51131
l6Sp	-2.68068
l7Sp	0.0773707
l8Sp	1.59437
l9Sp	2.58304
l1Sp	4.46253
l2Sp	-0.0344985
l3Sp	5.86795
l4Sp	0
l5Sp	-8.86948
l6Sp	7.28707
l7Sp	-1.92843
l8Sp	1.62752
l9Sp	-8.62391
l1Sp	1.08346
l2Sp	2.42091
l3Sp	0.272834
l4Sp	-5.86719
l5Sp	-2.52608
l6Sp	0
l7Sp	-0.772156
l8Sp	0.82758
l9Sp	-4.58773
l1Sp	3.32836
l2Sp	-0.708636
l3Sp	-3.07843
l4Sp	-8.52183
l5Sp	1.08331
l6Sp	1.29501
l7Sp	-0.645421
l8Sp	0
l9Sp	0.328352
l1Sp	5.04978
l2Sp	0
l3Sp	1.64416
l4Sp	-1.86611
l5Sp	-4.89226
l6Sp	2.98557
l7Sp	-1.39927
l8Sp	0.80239
l9Sp	-6.51194
l1Sp	-1.6654
l2Sp	-3.28567
l3Sp	-0.962476
l4Sp	-2.58731
l5Sp	0
l6Sp	2.82655
l7Sp	1.61963
l8Sp	2.88505
l9Sp	2.66974
l1Sp	12.5667
l2Sp	-7.90401
l3Sp	7.87824
l4Sp	0.0728513
l5Sp	-13.782
l6Sp	7.39561
l7Sp	0
l8Sp	-1.17693
l9Sp	-5.69462
l1Sp	-1.18118
l2Sp	3.49013
l3Sp	1.669
l4Sp	0.257963
l5Sp	-9.13652
l6Sp	1.65941
l7Sp	-2.96069
l8Sp	0
l9Sp	-3.6869
l1Sp	2.39257
l2Sp	3.14951
l3Sp	2.8981
l4Sp	-3.01649
l5Sp	-4.39009
l6Sp	0
l7Sp	-0.167413
l8Sp	2.38491
l9Sp	-2.24996
l1Sp	2.77232
l2Sp	0.0488521
l3Sp	1.68812
l4Sp	-6.18492
l5Sp	-6.46708
l6Sp	0.441719
l7Sp	0
l8Sp	-0.959564
l9Sp	-3.31376
l1Sp	9.10001
l2Sp	-1.56551
l3Sp	7.53478
l4Sp	-2.30787
l5Sp	-2.17776
l6Sp	9.70034
l7Sp	0
l8Sp	2.15159
l9Sp	-2.64739
l1Sp	9.94096
l2Sp	-2.39422
l3Sp	2.85859
l4Sp	-2.61338
l5Sp	-4.63869
l6Sp	2.83736
l7Sp	0
l8Sp	-0.933206
l9Sp	5.10477
l1Sp	5.10469
l2Sp	3.37207
l3Sp	0
l4Sp	-2.79958
l5Sp	-5.60828
l6Sp	6.38058
l7Sp	5.10347
l8Sp	-1.63975
l9Sp	-3.15376
l1Sp	3.41798
l2Sp	1.88576
l3Sp	-1.99051
l4Sp	-4.21027
l5Sp	-5.47859
l6Sp	0.516999
l7Sp	5.01116
l8Sp	0
l9Sp	-0.119545
l1Sp	-2.60853
l2Sp	2.28499
l3Sp	2.40746
l4Sp	-0.299026
l5Sp	-1.60731
l6Sp	-2.41003
l7Sp	4.47571
l8Sp	0
l9Sp	0.380944
l1Sp	-3.45942
l2Sp	7.1563
l3Sp	0
l4Sp	-2.3207
l5Sp	-6.25809
l6Sp	-0.546461
l7Sp	6.23046
l8Sp	2.32345
l9Sp	2.4967
l1Sp	0
l2Sp	3.5667
l3Sp	0.061737
l4Sp	-8.1721
l5Sp	-0.161335
l6Sp	-3.56972
l7Sp	4.00714
l8Sp	3.07296
l9Sp	-3.52797
l1Sp	0
l2Sp	2.58458
l3Sp	-0.200153
l4Sp	0.4893
l5Sp	-4.34645
l6Sp	1.44121
l7Sp	5.75333
l8Sp	-0.784267
l9Sp	-1.00169
l1Sp	-0.521015
l2Sp	0.456515
l3Sp	-3.10176
l4Sp	-6.58276
l5Sp	6.27499
l6Sp	-9.16144
l7Sp	0.32059
l8Sp	0
l9Sp	1.92888
l1Sp	2.13701
l2Sp	0.912683
l3Sp	0
l4Sp	-2.05822
l5Sp	-2.10436
l6Sp	2.01582
l7Sp	2.20722
l8Sp	-4.54673
l9Sp	-4.40075
l1Sp	-3.97855
l2Sp	2.42953
l3Sp	0
l4Sp	-3.93351
l5Sp	-2.9428
l6Sp	-1.91193
l7Sp	3.5643
l8Sp	1.38873
l9Sp	7.17265
l1Sp	2.13474
l2Sp	0
l3Sp	-1.88252
l4Sp	-7.79181
l5Sp	-0.989751
l6Sp	2.38904
l7Sp	1.35423
l8Sp	2.20997
l9Sp	-0.328234
l1Sp	0.21858
l2Sp	0
l3Sp	4.29444
l4Sp	-1.33402
l5Sp	-8.25409
l6Sp	1.00344
l7Sp	-0.33492
l8Sp	0.419793
l9Sp	-3.9776
l1Sp	3.14202
l2Sp	1.10686
l3Sp	1.69145
l4Sp	-1.78279
l5Sp	-0.502436
l6Sp	1.75812
l7Sp	0
l8Sp	-1.74605
l9Sp	-5.64682
l1Sp	0
l2Sp	-1.44373
l3Sp	3.27934
l4Sp	3.81799
l5Sp	-9.54848
l6Sp	12.5724
l7Sp	6.15917
l8Sp	-4.01357
l9Sp	-8.49307
l1Sp	5.00191
l2Sp	-2.21364
l3Sp	5.22125
l4Sp	-2.45266
l5Sp	-8.93989
l6Sp	12.1653
l7Sp	0
l8Sp	9.47779
l9Sp	-1.15619
l1Sp	6.5482
l2Sp	0
l3Sp	4.5226
l4Sp	-0.283938
l5Sp	-8.48142
l6Sp	8.09149
l7Sp	1.64504
l8Sp	-7.82391
l9Sp	-0.355702
l1Sp	4.49809
l2Sp	0
l3Sp	4.52584
l4Sp	-6.44579
l5Sp	-10.8777
l6Sp	7.86444
l7Sp	2.52976
l8Sp	-2.44055
l9Sp	-5.09363
l1Sp	4.27212
l2Sp	-2.76899
l3Sp	9.66475
l4Sp	-2.87574
l5Sp	-16.4018
l6Sp	7.11926
l7Sp	4.12742
l8Sp	0
l9Sp	-8.70774
l1Sp	0.601378
l2Sp	0.778
l3Sp	6.91058
l4Sp	-2.95516
l5Sp	-12.8471
l6Sp	4.26701
l7Sp	0
l8Sp	-1.64806
l9Sp	-11.359
l1Sp	6.34014
l2Sp	0
l3Sp	6.83462
l4Sp	-2.90317
l5Sp	-11.0713
l6Sp	5.1642
l7Sp	3.16911
l8Sp	-2.16627
l9Sp	-6.8349
l1Sp	2.9092
l2Sp	-2.24258
l3Sp	4.26527
l4Sp	6.48541
l5Sp	-8.51481
l6Sp	0
l7Sp	3.05002
l8Sp	-3.44049
l9Sp	-7.60567
l1Sp	0.609645
l2Sp	-2.69615
l3Sp	2.10888
l4Sp	5.55681
l5Sp	-15.3004
l6Sp	0
l7Sp	1.50282
l8Sp	-6.49449
l9Sp	-16.1062
l1Sp	-5.94254
l2Sp	1.3154
l3Sp	0
l4Sp	-9.32754
l5Sp	15.133
l6Sp	-14.0506
l7Sp	8.03754
l8Sp	19.9962
l9Sp	-1.45274
l1Sp	0
l2Sp	-4.88336
l3Sp	1.07279
l4Sp	-5.69684
l5Sp	14.0904
l6Sp	-5.89922
l7Sp	5.6449
l8Sp	13.5349
l9Sp	-2.55571
l1Sp	-1.59928
l2Sp	2.38327
l3Sp	0
l4Sp	-13.0325
l5Sp	1.69783
l6Sp	-4.53496
l7Sp	2.35169
l8Sp	14.9648
l9Sp	-2.67871
l1Sp	-1.55012
l2Sp	3.04615
l3Sp	-9.43307
l4Sp	-16.8938
l5Sp	8.71194
l6Sp	-12.7928
l7Sp	0
l8Sp	8.34357
l9Sp	0.40882
l1Sp	2.42472
l2Sp	1.9543
l3Sp	-3.02348
l4Sp	-5.66933
l5Sp	0
l6Sp	1.97415
l7Sp	-0.250369
l8Sp	14.4037
l9Sp	-2.76505
l1Sp	-3.31684
l2Sp	13.0474
l3Sp	5.38618
l4Sp	-2.75326
l5Sp	6.11427
l6Sp	-8.53361
l7Sp	0
l8Sp	17.3994
l9Sp	-0.718793
l1Sp	-1.5437
l2Sp	2.03462
l3Sp	5.66535
l4Sp	2.27352
l5Sp	-9.50088
l6Sp	0
l7Sp	0.580977
l8Sp	-4.88461
l9Sp	-10.0444
l1Sp	-5.90803
l2Sp	2.15409
l3Sp	-2.45679
l4Sp	4.35721
l5Sp	3.57012
l6Sp	-8.22888
l7Sp	-7.38904
l8Sp	0
l9Sp	1.65306
l1Sp	-7.46146
l2Sp	5.1557
l3Sp	-2.50562
l4Sp	2.11093
l5Sp	2.42818
l6Sp	-3.30604
l7Sp	-4.00003
l8Sp	0.613477
l9Sp	0
l1Sp	0.869329
l2Sp	-4.57682
l3Sp	8.69049
l4Sp	5.2388
l5Sp	-16.9632
l6Sp	5.14531
l7Sp	-4.37909
l8Sp	0
l9Sp	-19.579
l1Sp	-7.96429
l2Sp	2.76694
l3Sp	-8.91638
l4Sp	1.78457
l5Sp	2.81713
l6Sp	-4.79961
l7Sp	-3.60452
l8Sp	0
l9Sp	4.64791
l1Sp	-13.1398
l2Sp	3.2445
l3Sp	-13.7094
l4Sp	0
l5Sp	13.4398
l6Sp	-11.7684
l7Sp	-3.7987
l8Sp	0.607903
l9Sp	10.6976
l1Sp	-7.55935
l2Sp	5.13216
l3Sp	-2.15935
l4Sp	0
l5Sp	7.98657
l6Sp	-5.31283
l7Sp	-2.67694
l8Sp	3.74409
l9Sp	4.7829
l1Sp	-7.00227
l2Sp	1.43705
l3Sp	-2.58526
l4Sp	0
l5Sp	4.27421
l6Sp	-3.36928
l7Sp	-4.17264
l8Sp	1.99713
l9Sp	2.98843
l1Sp	-5.47998
l2Sp	8.9644
l3Sp	-0.969263
l4Sp	10.1236
l5Sp	1.37745
l6Sp	-6.26154
l7Sp	0
l8Sp	2.54658
l9Sp	-3.0848
l1Sp	-2.38464
l2Sp	0
l3Sp	0.361137
l4Sp	11.2283
l5Sp	-1.21851
l6Sp	-7.22214
l7Sp	8.91115
l8Sp	5.75651
l9Sp	-2.63633
l1Sp	-5.52619
l2Sp	9.73229
l3Sp	2.33074
l4Sp	14.4567
l5Sp	-0.363324
l6Sp	-4.52875
l7Sp	-3.2869
l8Sp	5.84765
l9Sp	0
l1Sp	7.26743
l2Sp	4.02815
l3Sp	-0.180064
l4Sp	0.0761217
l5Sp	-6.40655
l6Sp	5.72185
l7Sp	0
l8Sp	-7.22807
l9Sp	-5.34452
l1Sp	3.22814
l2Sp	0
l3Sp	1.84368
l4Sp	7.55522
l5Sp	-1.81976
l6Sp	4.00335
l7Sp	-1.70968
l8Sp	-3.38129
l9Sp	-2.65519
l1Sp	2.70194
l2Sp	-6.9317
l3Sp	7.42595
l4Sp	4.94023
l5Sp	-13.8149
l6Sp	2.48884
l7Sp	0
l8Sp	-7.64391
l9Sp	-19.863
l1Sp	0
l2Sp	-4.00471
l3Sp	5.7311
l4Sp	9.69819
l5Sp	-5.94124
l6Sp	1.93781
l7Sp	3.66793
l8Sp	-6.75297
l9Sp	-11.301
l1Sp	0
l2Sp	-4.18735
l3Sp	6.36656
l4Sp	13.0568
l5Sp	-15.5741
l6Sp	12.8557
l7Sp	3.5243
l8Sp	-10.475
l9Sp	-21.2033
l1Sp	6.06643
l2Sp	-0.901508
l3Sp	2.65364
l4Sp	7.71933
l5Sp	-4.0067
l6Sp	6.54301
l7Sp	-2.15514
l8Sp	0
l9Sp	-5.56012
l1Sp	0
l2Sp	-2.41741
l3Sp	0.683492
l4Sp	9.75388
l5Sp	7.13302
l6Sp	-15.3284
l7Sp	-4.60369
l8Sp	-5.85911
l9Sp	1.34417
l1Sp	3.0224
l2Sp	-0.86701
l3Sp	2.24113
l4Sp	7.04636
l5Sp	0
l6Sp	-12.0892
l7Sp	-2.41243
l8Sp	-1.70785
l9Sp	0.934215
l1Sp	-2.26476
l2Sp	-3.86524
l3Sp	0.328206
l4Sp	2.18042
l5Sp	-0.974533
l6Sp	3.11804
l7Sp	0
l8Sp	-3.17498
l9Sp	4.37043
l1Sp	-16.7249
l2Sp	-6.76712
l3Sp	0
l4Sp	0.747544
l5Sp	-4.87422
l6Sp	2.71998
l7Sp	8.01825
l8Sp	-10.6016
l9Sp	0.614355
l1Sp	-3.71319
l2Sp	-0.83866
l3Sp	-2.88223
l4Sp	0.867667
l5Sp	2.33025
l6Sp	0
l7Sp	2.36311
l8Sp	-3.82605
l9Sp	5.38366
l1Sp	9.17858
l2Sp	0
l3Sp	-5.17509
l4Sp	6.28307
l5Sp	5.45503
l6Sp	-2.45722
l7Sp	-2.76058
l8Sp	-3.21075
l9Sp	8.36863
l1Sp	15.6285
l2Sp	-1.5681
l3Sp	-0.85805
l4Sp	16.8075
l5Sp	4.75333
l6Sp	0
l7Sp	-2.07322
l8Sp	-5.64888
l9Sp	4.88937
l1Sp	1.61078
l2Sp	-3.56562
l3Sp	-2.99377
l4Sp	0
l5Sp	8.09277
l6Sp	5.78703
l7Sp	-1.51183
l8Sp	-0.894781
l9Sp	10.0199
l1Sp	-0.463704
l2Sp	0.310161
l3Sp	-8.83753
l4Sp	-7.72394
l5Sp	3.65779
l6Sp	2.96491
l7Sp	-3.2168
l8Sp	0
l9Sp	2.0899
l1Sp	0
l2Sp	2.99321
l3Sp	-2.04118
l4Sp	11.9256
l5Sp	2.60343
l6Sp	-17.5708
l7Sp	1.14326
l8Sp	-7.74881
l9Sp	-1.36652
l1Sp	3.93929
l2Sp	-3.62299
l3Sp	-2.31507
l4Sp	0
l5Sp	8.76051
l6Sp	-3.16703
l7Sp	-3.71473
l8Sp	2.43062
l9Sp	3.4187
l1Sp	6.58525
l2Sp	-0.89522
l3Sp	4.01663
l4Sp	18.7098
l5Sp	2.38326
l6Sp	-11.2011
l7Sp	-5.6405
l8Sp	0
l9Sp	-2.76362
l1Sp	-3.21173
l2Sp	-5.63905
l3Sp	0.502781
l4Sp	14.2006
l5Sp	0
l6Sp	-4.11913
l7Sp	5.17022
l8Sp	-4.9719
l9Sp	0.0656258
l1Sp	0
l2Sp	-4.37458
l3Sp	2.37681
l4Sp	8.22277
l5Sp	-9.74968
l6Sp	1.06227
l7Sp	1.2365
l8Sp	-12.7935
l9Sp	-13.8946
l1Sp	0
l2Sp	-8.58486
l3Sp	1.29448
l4Sp	13.3434
l5Sp	3.08047
l6Sp	-4.00892
l7Sp	5.26044
l8Sp	-15.3877
l9Sp	-3.61778
l1Sp	-0.343696
l2Sp	0
l3Sp	2.8705
l4Sp	4.28855
l5Sp	-9.80469
l6Sp	-9.5611
l7Sp	9.73018
l8Sp	-1.25049
l9Sp	5.27775
l1Sp	6.93453
l2Sp	2.52265
l3Sp	3.71877
l4Sp	-1.75441
l5Sp	-7.11723
l6Sp	2.88141
l7Sp	0
l8Sp	-1.73472
l9Sp	-3.13432
l1Sp	19.8175
l2Sp	0
l3Sp	3.64673
l4Sp	-0.777932
l5Sp	-11.4401
l6Sp	-3.62881
l7Sp	9.31913
l8Sp	-10.3665
l9Sp	0.616135
l1Sp	1.04985
l2Sp	-1.79775
l3Sp	4.53967
l4Sp	-2.35421
l5Sp	-4.88227
l6Sp	1.73218
l7Sp	6.889
l8Sp	0
l9Sp	-6.64983
l1Sp	-1.99009
l2Sp	5.57436
l3Sp	-0.832525
l4Sp	2.00467
l5Sp	3.92864
l6Sp	0
l7Sp	1.71767
l8Sp	-1.65217
l9Sp	-0.125897
l1Sp	0
l2Sp	5.39828
l3Sp	-3.5511
l4Sp	4.49529
l5Sp	-2.42623
l6Sp	3.21912
l7Sp	5.52628
l8Sp	-2.77581
l9Sp	-8.63789
l1Sp	0.512715
l2Sp	-2.76238
l3Sp	-0.0609382
l4Sp	-1.3992
l5Sp	1.95223
l6Sp	1.79754
l7Sp	3.75413
l8Sp	0
l9Sp	-5.40833
l1Sp	6.89642
l2Sp	-0.303828
l3Sp	0
l4Sp	1.2243
l5Sp	-1.61041
l6Sp	0.313057
l7Sp	4.76528
l8Sp	-1.18616
l9Sp	-5.2413
l1Sp	-10.5213
l2Sp	4.7199
l3Sp	5.77736
l4Sp	1.2131
l5Sp	-4.09351
l6Sp	0
l7Sp	-3.92418
l8Sp	7.84283
l9Sp	-4.51049
l1Sp	-9.93899
l2Sp	2.19713
l3Sp	3.82377
l4Sp	1.89765
l5Sp	-4.77456
l6Sp	0
l7Sp	-2.57787
l8Sp	2.80733
l9Sp	-6.23292
l1Sp	-4.96079
l2Sp	-2.53767
l3Sp	1.3777
l4Sp	0.847276
l5Sp	-2.19701
l6Sp	0.289606
l7Sp	0
l8Sp	11.5661
l9Sp	-2.35941
l1Sp	-1.94142
l2Sp	-0.999423
l3Sp	7.95627
l4Sp	4.59678
l5Sp	-6.27168
l6Sp	5.04318
l7Sp	0
l8Sp	4.30991
l9Sp	-1.18427
l1Sp	-10.1846
l2Sp	1.9661
l3Sp	0.0947455
l4Sp	0.073055
l5Sp	-5.18311
l6Sp	-1.28636
l7Sp	0.0750235
l8Sp	0
l9Sp	-2.48854
l1Sp	-4.13092
l2Sp	-0.120098
l3Sp	3.26982
l4Sp	0
l5Sp	0.113046
l6Sp	3.12018
l7Sp	-3.04596
l8Sp	7.13339
l9Sp	-1.93624
l1Sp	5.77737
l2Sp	-7.51683
l3Sp	0.868663
l4Sp	1.83168
l5Sp	-8.64018
l6Sp	12.7587
l7Sp	-0.285973
l8Sp	0
l9Sp	-0.951549
l1Sp	4.91053
l2Sp	-2.82762
l3Sp	2.1027
l4Sp	6.15312
l5Sp	-9.2311
l6Sp	14.5746
l7Sp	0
l8Sp	-3.51752
l9Sp	-1.36408
l1Sp	-1.77528
l2Sp	3.45026
l3Sp	1.19105
l4Sp	3.93509
l5Sp	-3.83237
l6Sp	-2.91743
l7Sp	-4.22572
l8Sp	0
l9Sp	0.263983
l1Sp	4.78703
l2Sp	-17.6605
l3Sp	1.01094
l4Sp	-11.5582
l5Sp	-5.64419
l6Sp	6.97703
l7Sp	0.124361
l8Sp	-3.65292
l9Sp	0
l1Sp	4.3239
l2Sp	3.275
l3Sp	0
l4Sp	-10.0391
l5Sp	-3.516
l6Sp	5.27536
l7Sp	-14.205
l8Sp	1.32714
l9Sp	-1.04425
l1Sp	2.20205
l2Sp	-0.20372
l3Sp	4.40612
l4Sp	-7.40539
l5Sp	0
l6Sp	3.59722
l7Sp	-13.9388
l8Sp	-6.36472
l9Sp	0.678264
l1Sp	12.0868
l2Sp	2.20295
l3Sp	4.14807
l4Sp	-1.09307
l5Sp	0
l6Sp	5.91387
l7Sp	-1.81319
l8Sp	-3.38367
l9Sp	-4.04025
l1Sp	9.98888
l2Sp	4.97148
l3Sp	4.56078
l4Sp	0
l5Sp	-8.45075
l6Sp	5.17018
l7Sp	-2.97798
l8Sp	-4.00633
l9Sp	-13.0322
l1Sp	-4.87807
l2Sp	1.34458
l3Sp	-3.38111
l4Sp	-1.56361
l5Sp	0
l6Sp	5.31421
l7Sp	-4.75835
l8Sp	0.265366
l9Sp	3.94676
l1Sp	6.24705
l2Sp	-8.25109
l3Sp	0
l4Sp	1.28034
l5Sp	-10.2877
l6Sp	16.7525
l7Sp	1.20979
l8Sp	-3.38423
l9Sp	-5.50118
l1Sp	0
l2Sp	2.09057
l3Sp	5.47468
l4Sp	-1.47867
l5Sp	-5.53952
l6Sp	-6.73298
l7Sp	5.75355
l8Sp	2.86564
l9Sp	-10.5623
l1Sp	-1.29037
l2Sp	1.31503
l3Sp	5.87929
l4Sp	0
l5Sp	-8.87363
l6Sp	-0.745934
l7Sp	10.9077
l8Sp	6.83888
l9Sp	-15.668
l1Sp	0
l2Sp	-3.67154
l3Sp	2.21175
l4Sp	-1.24299
l5Sp	-5.15754
l6Sp	0.673002
l7Sp	5.75603
l8Sp	4.19217
l9Sp	-2.80528
l1Sp	0.883877
l2Sp	-0.172191
l3Sp	5.89088
l4Sp	-6.85909
l5Sp	8.66694
l6Sp	-3.16538
l7Sp	0
l8Sp	5.99409
l9Sp	-2.05423
l1Sp	2.52102
l2Sp	0
l3Sp	0.736415
l4Sp	-12.5729
l5Sp	0.762259
l6Sp	-5.8651
l7Sp	-2.07164
l8Sp	3.95855
l9Sp	-5.84411
l1Sp	0
l2Sp	-11.5936
l3Sp	0.664954
l4Sp	0.910342
l5Sp	-13.6285
l6Sp	-0.678619
l7Sp	5.86307
l8Sp	2.88376
l9Sp	-8.40674
l1Sp	0
l2Sp	2.52597
l3Sp	3.52697
l4Sp	-2.46234
l5Sp	-3.03235
l6Sp	-2.90707
l7Sp	0.598133
l8Sp	6.14459
l9Sp	-5.74805
l1Sp	-5.58789
l2Sp	3.58428
l3Sp	4.73191
l4Sp	-2.47415
l5Sp	-3.79896
l6Sp	0
l7Sp	3.53229
l8Sp	3.45739
l9Sp	-2.5824
l1Sp	-5.08587
l2Sp	3.31702
l3Sp	6.33905
l4Sp	3.9928
l5Sp	-13.8825
l6Sp	0
l7Sp	-0.549735
l8Sp	2.77387
l9Sp	-14.9398
l1Sp	0
l2Sp	-6.84324
l3Sp	-10.0007
l4Sp	3.43302
l5Sp	28.2452
l6Sp	-12.8301
l7Sp	1.8399
l8Sp	-6.59676
l9Sp	0.133456
l1Sp	-4.40161
l2Sp	0
l3Sp	-5.50895
l4Sp	3.22882
l5Sp	9.42135
l6Sp	-2.12811
l7Sp	1.35539
l8Sp	5.69321
l9Sp	-2.17083
l1Sp	2.12512
l2Sp	0
l3Sp	-2.82358
l4Sp	-0.0209325
l5Sp	8.38606
l6Sp	0.509147
l7Sp	-0.939038
l8Sp	-2.0595
l9Sp	0.626405
l1Sp	21.9758
l2Sp	-12.5684
l3Sp	10.3753
l4Sp	0
l5Sp	-19.3443
l6Sp	7.52748
l7Sp	1.89
l8Sp	-8.95304
l9Sp	-14.5583
l1Sp	26.7192
l2Sp	-12.1512
l3Sp	11.1183
l4Sp	0
l5Sp	-14.922
l6Sp	9.00522
l7Sp	0.681657
l8Sp	-13.202
l9Sp	-12.4476
l1Sp	10.2364
l2Sp	-3.30264
l3Sp	0
l4Sp	2.16111
l5Sp	-9.09083
l6Sp	1.04115
l7Sp	1.39078
l8Sp	-7.4654
l9Sp	-5.46652
l1Sp	15.8436
l2Sp	-11.3088
l3Sp	13.3751
l4Sp	2.08007
l5Sp	-20.8607
l6Sp	12.7904
l7Sp	0
l8Sp	-5.92718
l9Sp	-17.9797
l1Sp	0
l2Sp	-3.38453
l3Sp	8.63968
l4Sp	4.06078
l5Sp	-9.46706
l6Sp	14.1046
l7Sp	1.37143
l8Sp	-10.1113
l9Sp	-7.62893
l1Sp	0.442565
l2Sp	-4.75667
l3Sp	3.37922
l4Sp	0.000536838
l5Sp	-5.4643
l6Sp	0
l7Sp	1.92126
l8Sp	-2.61664
l9Sp	-4.40012
l1Sp	7.3838
l2Sp	-1.59186
l3Sp	5.86517
l4Sp	9.55966
l5Sp	-5.43572
l6Sp	1.35781
l7Sp	0
l8Sp	-0.860545
l9Sp	-10.5678
l1Sp	9.48504
l2Sp	-6.46778
l3Sp	7.73432
l4Sp	4.12115
l5Sp	-14.4544
l6Sp	0.12638
l7Sp	0
l8Sp	-3.59019
l9Sp	-17.9938
l1Sp	-1.2944
l2Sp	4.63163
l3Sp	-1.2405
l4Sp	0
l5Sp	3.9854
l6Sp	5.45407
l7Sp	-1.54683
l8Sp	-1.23811
l9Sp	6.39455
