# Supplementary material for: A robust method for measuring aminoacylation through tRNA-Seq
Source: eLife. 2024 Jul 30;12:RP91554. doi: 10.7554/eLife.91554 (PMC11288633; doi:10.7554/eLife.91554)
Supplement: Figure 4—source data 1. [file elife-91554-fig4-data1.xlsx]

## Sheet: Fig4A
barcode	charge_median_dev
l1Sp	-0.454649
l2Sp	-0.386653
l3Sp	0
l4Sp	3.29601
l5Sp	3.57143
l6Sp	0.469014
l7Sp	-0.027383
l8Sp	-0.855205
l9Sp	1.09057
l1Sp	-0.7088
l2Sp	-2.15799
l3Sp	0.526245
l4Sp	2.00687
l5Sp	0.733738
l6Sp	0.256811
l7Sp	0
l8Sp	-1.84206
l9Sp	-0.892366
l1Sp	-0.00241453
l2Sp	0.015604
l3Sp	0
l4Sp	0.683118
l5Sp	0.614833
l6Sp	0.62671
l7Sp	-0.151506
l8Sp	-0.089623
l9Sp	-0.506323
l1Sp	0.0836546
l2Sp	-1.60535
l3Sp	0.252221
l4Sp	-0.420292
l5Sp	-0.388332
l6Sp	0.732865
l7Sp	-0.252845
l8Sp	0.797126
l9Sp	0
l1Sp	0
l2Sp	-0.149963
l3Sp	0.641308
l4Sp	1.69473
l5Sp	1.88472
l6Sp	1.17738
l7Sp	-0.561487
l8Sp	-1.91095
l9Sp	-0.882744
l1Sp	2.47127
l2Sp	-2.09563
l3Sp	0.396988
l4Sp	4.19985
l5Sp	-0.202877
l6Sp	2.51773
l7Sp	-1.22503
l8Sp	-4.80765
l9Sp	0
l1Sp	1.53667
l2Sp	1.84521
l3Sp	-3.24952
l4Sp	2.66678
l5Sp	-1.27413
l6Sp	0.997687
l7Sp	-1.28531
l8Sp	-3.06064
l9Sp	0
l1Sp	1.47499
l2Sp	-4.69032
l3Sp	0.148215
l4Sp	5.07575
l5Sp	-2.267
l6Sp	4.16066
l7Sp	-0.344638
l8Sp	-7.3221
l9Sp	0
l1Sp	2.22429
l2Sp	-0.746129
l3Sp	1.3719
l4Sp	5.51099
l5Sp	0
l6Sp	4.32112
l7Sp	-1.67274
l8Sp	-4.38981
l9Sp	-0.0409687
l1Sp	-0.298794
l2Sp	0
l3Sp	0.267606
l4Sp	1.78725
l5Sp	1.30323
l6Sp	-0.550301
l7Sp	-0.960956
l8Sp	-0.47501
l9Sp	0.10407
l1Sp	0.0331032
l2Sp	-0.938372
l3Sp	0
l4Sp	4.01142
l5Sp	1.48226
l6Sp	0.821195
l7Sp	-0.517498
l8Sp	-1.24512
l9Sp	-1.49998
l1Sp	0.0947829
l2Sp	-0.988815
l3Sp	1.12993
l4Sp	3.39308
l5Sp	0
l6Sp	1.22064
l7Sp	-0.749908
l8Sp	-0.81651
l9Sp	-0.938955
l1Sp	0.260796
l2Sp	0.00400257
l3Sp	-0.11546
l4Sp	1.92897
l5Sp	0
l6Sp	1.05409
l7Sp	-1.21801
l8Sp	-1.22401
l9Sp	-0.778682
l1Sp	0
l2Sp	-0.409232
l3Sp	0.303241
l4Sp	0.975634
l5Sp	1.32297
l6Sp	0.209692
l7Sp	-0.373955
l8Sp	-1.54755
l9Sp	-1.1249
l1Sp	1.03073
l2Sp	-1.54693
l3Sp	0.935646
l4Sp	4.31058
l5Sp	0
l6Sp	1.2756
l7Sp	-1.37912
l8Sp	-2.36916
l9Sp	-1.04944
l1Sp	-0.153821
l2Sp	0.192651
l3Sp	0.898788
l4Sp	3.46267
l5Sp	0.861511
l6Sp	0
l7Sp	-1.23543
l8Sp	-0.251327
l9Sp	-1.28098
l1Sp	0.407783
l2Sp	-1.2407
l3Sp	0
l4Sp	2.57329
l5Sp	0.136299
l6Sp	0.0363805
l7Sp	-0.768571
l8Sp	-1.48916
l9Sp	-1.75637
l1Sp	0.880916
l2Sp	-0.486757
l3Sp	0.545979
l4Sp	0.851093
l5Sp	0
l6Sp	0.426075
l7Sp	-0.656542
l8Sp	-0.588053
l9Sp	-1.21309
l1Sp	2.58937
l2Sp	-1.0903
l3Sp	2.89584
l4Sp	6.14263
l5Sp	0
l6Sp	4.165
l7Sp	-0.478831
l8Sp	-2.77383
l9Sp	-1.36014
l1Sp	0
l2Sp	-1.06343
l3Sp	-1.22403
l4Sp	2.30245
l5Sp	1.20208
l6Sp	3.14436
l7Sp	1.5354
l8Sp	-0.0688838
l9Sp	-1.68852
l1Sp	0
l2Sp	-1.64233
l3Sp	-1.52115
l4Sp	3.88466
l5Sp	1.72072
l6Sp	1.51197
l7Sp	0.796255
l8Sp	-4.00248
l9Sp	-1.43671
l1Sp	-0.809101
l2Sp	-0.713845
l3Sp	0
l4Sp	0.710414
l5Sp	0.379137
l6Sp	0.110948
l7Sp	0.697069
l8Sp	-3.42326
l9Sp	-1.05524
l1Sp	2.12058
l2Sp	-2.25276
l3Sp	2.15315
l4Sp	6.75443
l5Sp	0
l6Sp	4.27029
l7Sp	-1.42883
l8Sp	-3.90902
l9Sp	-2.04789
l1Sp	0.553017
l2Sp	0
l3Sp	0.2622
l4Sp	1.06612
l5Sp	-0.434528
l6Sp	-0.254641
l7Sp	0.107958
l8Sp	-0.793889
l9Sp	-1.01757
l1Sp	0.200148
l2Sp	0
l3Sp	0.136545
l4Sp	1.38589
l5Sp	0.903868
l6Sp	-0.00534922
l7Sp	-0.388984
l8Sp	-0.438105
l9Sp	-0.596827
l1Sp	-0.032652
l2Sp	-0.636971
l3Sp	0.208414
l4Sp	0.708045
l5Sp	0.103029
l6Sp	0.253495
l7Sp	0
l8Sp	-0.0526449
l9Sp	-0.734425
l1Sp	0.660248
l2Sp	-0.394007
l3Sp	0.0788135
l4Sp	1.10226
l5Sp	-0.122529
l6Sp	0
l7Sp	0.0401444
l8Sp	-0.560223
l9Sp	-0.912785
l1Sp	0
l2Sp	-1.17664
l3Sp	0.510365
l4Sp	1.91686
l5Sp	0.531523
l6Sp	0.0521733
l7Sp	-0.289086
l8Sp	-0.785375
l9Sp	-1.65483
l1Sp	0
l2Sp	-1.01608
l3Sp	-0.275874
l4Sp	1.25077
l5Sp	2.97502
l6Sp	0.449397
l7Sp	-0.394243
l8Sp	0.536864
l9Sp	-0.170424
l1Sp	0
l2Sp	-0.97083
l3Sp	0.730634
l4Sp	2.24443
l5Sp	0.722226
l6Sp	0.528149
l7Sp	-0.880409
l8Sp	-1.92997
l9Sp	-1.69419
l1Sp	0.150617
l2Sp	-1.98238
l3Sp	0.249141
l4Sp	3.52669
l5Sp	0.247928
l6Sp	0
l7Sp	-1.3225
l8Sp	-2.40323
l9Sp	-1.86879
l1Sp	-0.0906037
l2Sp	0
l3Sp	0.897846
l4Sp	3.28215
l5Sp	-0.0201877
l6Sp	1.82157
l7Sp	0.441519
l8Sp	-0.104385
l9Sp	-0.213159
l1Sp	0.230873
l2Sp	-0.763721
l3Sp	-1.71469
l4Sp	2.06647
l5Sp	0.801197
l6Sp	0.172229
l7Sp	-1.15315
l8Sp	-3.75955
l9Sp	0
l1Sp	0.566166
l2Sp	-0.918471
l3Sp	0
l4Sp	3.72857
l5Sp	1.07439
l6Sp	1.7286
l7Sp	-0.413743
l8Sp	-1.99076
l9Sp	-2.04486
l1Sp	0.023643
l2Sp	-1.20297
l3Sp	0.283303
l4Sp	1.86932
l5Sp	-0.199769
l6Sp	1.48263
l7Sp	-1.42001
l8Sp	0
l9Sp	-1.258
l1Sp	0
l2Sp	-0.254041
l3Sp	-0.682271
l4Sp	3.62563
l5Sp	1.65683
l6Sp	0.390445
l7Sp	0.387365
l8Sp	-0.951271
l9Sp	-0.267167
l1Sp	-1.67885
l2Sp	-1.78559
l3Sp	0
l4Sp	4.14584
l5Sp	2.09104
l6Sp	0.416446
l7Sp	-0.209359
l8Sp	-1.02904
l9Sp	0.272837
l1Sp	-0.643953
l2Sp	-1.29215
l3Sp	0
l4Sp	1.14353
l5Sp	0.570861
l6Sp	0.88593
l7Sp	0.110446
l8Sp	-0.902796
l9Sp	-2.12293
l1Sp	-0.0539906
l2Sp	-0.33734
l3Sp	0
l4Sp	2.36553
l5Sp	0.745008
l6Sp	1.40182
l7Sp	-0.87121
l8Sp	0.568084
l9Sp	-1.64546
l1Sp	0.247067
l2Sp	-1.09276
l3Sp	0
l4Sp	5.5747
l5Sp	0.515634
l6Sp	0.45739
l7Sp	-0.905235
l8Sp	-2.1618
l9Sp	-2.33215
l1Sp	1.62044
l2Sp	-0.930225
l3Sp	0.992793
l4Sp	4.71507
l5Sp	-0.145849
l6Sp	2.3555
l7Sp	0
l8Sp	-1.20645
l9Sp	-1.04913
l1Sp	2.22758
l2Sp	0.29028
l3Sp	-0.927464
l4Sp	2.90277
l5Sp	2.07176
l6Sp	-0.74202
l7Sp	0
l8Sp	-1.54167
l9Sp	-1.59986
l1Sp	1.47743
l2Sp	-0.994611
l3Sp	0
l4Sp	4.91544
l5Sp	1.35283
l6Sp	2.28727
l7Sp	-0.311003
l8Sp	-1.36191
l9Sp	-0.232215
l1Sp	1.8668
l2Sp	-0.513055
l3Sp	1.44603
l4Sp	4.23561
l5Sp	0
l6Sp	2.28215
l7Sp	-0.0782468
l8Sp	-1.22873
l9Sp	-0.813654
l1Sp	0.981199
l2Sp	-1.31406
l3Sp	0
l4Sp	3.94014
l5Sp	0.742679
l6Sp	1.39259
l7Sp	-0.337886
l8Sp	-1.84739
l9Sp	-0.97193
l1Sp	0
l2Sp	-0.425982
l3Sp	-2.48914
l4Sp	1.05255
l5Sp	1.10309
l6Sp	1.16523
l7Sp	0.719439
l8Sp	-0.664271
l9Sp	-1.663
l1Sp	1.54448
l2Sp	-0.0485073
l3Sp	-0.802018
l4Sp	4.7369
l5Sp	0.925845
l6Sp	2.73485
l7Sp	0
l8Sp	-3.10539
l9Sp	-0.148211
l1Sp	1.16545
l2Sp	-0.800285
l3Sp	0.624099
l4Sp	3.67665
l5Sp	0
l6Sp	1.94747
l7Sp	-0.728636
l8Sp	-1.50439
l9Sp	-0.945156
l1Sp	1.12653
l2Sp	-0.779895
l3Sp	0.499672
l4Sp	1.85357
l5Sp	0
l6Sp	1.02071
l7Sp	-0.593998
l8Sp	-0.679622
l9Sp	-0.61467
l1Sp	-0.441697
l2Sp	-0.794208
l3Sp	0.726248
l4Sp	1.36252
l5Sp	2.13234
l6Sp	0
l7Sp	0.544807
l8Sp	-0.430389
l9Sp	-1.34158
l1Sp	1.27293
l2Sp	-1.23642
l3Sp	1.42805
l4Sp	2.10657
l5Sp	0
l6Sp	2.18638
l7Sp	-0.38988
l8Sp	-1.64029
l9Sp	-0.819169
l1Sp	0.409453
l2Sp	-1.67312
l3Sp	0.221456
l4Sp	1.54802
l5Sp	0
l6Sp	0.782687
l7Sp	-1.44819
l8Sp	-2.73162
l9Sp	-1.48834
l1Sp	-1.05929
l2Sp	0
l3Sp	-1.09355
l4Sp	1.02403
l5Sp	2.85596
l6Sp	-0.959904
l7Sp	0.800414
l8Sp	-1.23023
l9Sp	0.654093
l1Sp	1.13116
l2Sp	-1.15383
l3Sp	0.570683
l4Sp	2.67834
l5Sp	1.97035
l6Sp	0
l7Sp	-0.193608
l8Sp	-1.48172
l9Sp	-1.10647
l1Sp	0.577525
l2Sp	-0.376342
l3Sp	0
l4Sp	3.38408
l5Sp	0.50622
l6Sp	0.148017
l7Sp	-0.910731
l8Sp	-2.27058
l9Sp	-1.61292
l1Sp	0.329911
l2Sp	-1.48408
l3Sp	-0.313498
l4Sp	1.75289
l5Sp	2.83714
l6Sp	-0.979683
l7Sp	0
l8Sp	0.558904
l9Sp	-1.93398
l1Sp	-0.222829
l2Sp	-1.74398
l3Sp	0
l4Sp	2.63571
l5Sp	1.629
l6Sp	0.539829
l7Sp	0.158608
l8Sp	-0.839301
l9Sp	-1.06732
l1Sp	2.5858
l2Sp	-2.22085
l3Sp	2.13725
l4Sp	5.63044
l5Sp	-1.76682
l6Sp	4.73803
l7Sp	0
l8Sp	-3.56414
l9Sp	-0.413871
l1Sp	0.874562
l2Sp	-1.41736
l3Sp	1.45687
l4Sp	1.87845
l5Sp	-2.80657
l6Sp	1.7729
l7Sp	-1.1935
l8Sp	0
l9Sp	-2.44925
l1Sp	0.253958
l2Sp	-3.99759
l3Sp	-0.499638
l4Sp	4.4427
l5Sp	1.69973
l6Sp	0.43245
l7Sp	-1.7281
l8Sp	-1.64932
l9Sp	0
l1Sp	1.78863
l2Sp	-1.93104
l3Sp	1.17501
l4Sp	2.83731
l5Sp	2.28747
l6Sp	0
l7Sp	-1.6234
l8Sp	-4.22558
l9Sp	-0.755908
l1Sp	-1.2545
l2Sp	-1.23982
l3Sp	0.444218
l4Sp	3.07787
l5Sp	0.331436
l6Sp	0.201357
l7Sp	-2.62715
l8Sp	-1.88411
l9Sp	0
l1Sp	1.46336
l2Sp	0
l3Sp	2.30121
l4Sp	2.60881
l5Sp	-1.14936
l6Sp	0.47735
l7Sp	-2.52282
l8Sp	-1.5802
l9Sp	-1.32924
l1Sp	0
l2Sp	-1.86281
l3Sp	0.321467
l4Sp	2.1658
l5Sp	0.262785
l6Sp	0.0416966
l7Sp	-1.4321
l8Sp	-2.07475
l9Sp	-1.22566

## Sheet: Fig4B
barcode	RPM_median_dev_p
l1Sp	3.20546
l2Sp	2.26263
l3Sp	0
l4Sp	-2.62713
l5Sp	-3.97141
l6Sp	-1.60707
l7Sp	1.7467
l8Sp	-1.53355
l9Sp	3.78906
l1Sp	6.98983
l2Sp	-12.6425
l3Sp	3.85224
l4Sp	-0.936658
l5Sp	-3.76452
l6Sp	-0.384374
l7Sp	3.7152
l8Sp	0.208291
l9Sp	0
l1Sp	3.02684
l2Sp	0
l3Sp	3.87015
l4Sp	-4.53377
l5Sp	-9.49407
l6Sp	5.5407
l7Sp	2.02746
l8Sp	-0.322136
l9Sp	-2.51699
l1Sp	20.1119
l2Sp	0.559987
l3Sp	-0.460556
l4Sp	-3.85586
l5Sp	-10.3883
l6Sp	12.0375
l7Sp	0
l8Sp	1.58288
l9Sp	-0.252952
l1Sp	0.06494
l2Sp	-1.29768
l3Sp	0
l4Sp	8.03955
l5Sp	0.289133
l6Sp	-0.113399
l7Sp	2.3884
l8Sp	-5.95026
l9Sp	-1.87136
l1Sp	-3.22061
l2Sp	0
l3Sp	4.69342
l4Sp	0.165954
l5Sp	-3.86898
l6Sp	-2.05608
l7Sp	1.64649
l8Sp	6.26719
l9Sp	-3.06125
l1Sp	2.2201
l2Sp	-4.23322
l3Sp	0
l4Sp	-3.33588
l5Sp	-2.9187
l6Sp	2.3519
l7Sp	0.913894
l8Sp	0.242448
l9Sp	-3.98538
l1Sp	0
l2Sp	0.161188
l3Sp	4.42738
l4Sp	-5.36455
l5Sp	6.37914
l6Sp	-4.44431
l7Sp	-1.1325
l8Sp	6.67776
l9Sp	-2.89081
l1Sp	0
l2Sp	-1.42323
l3Sp	2.73138
l4Sp	-0.215146
l5Sp	1.26117
l6Sp	-1.20596
l7Sp	5.34144
l8Sp	2.2986
l9Sp	-2.24918
l1Sp	3.68359
l2Sp	-1.9416
l3Sp	4.22034
l4Sp	-0.697866
l5Sp	-9.13781
l6Sp	10.951
l7Sp	2.6792
l8Sp	0
l9Sp	-4.7402
l1Sp	4.49909
l2Sp	0
l3Sp	0.020679
l4Sp	-5.06199
l5Sp	0.393615
l6Sp	1.74512
l7Sp	-6.99894
l8Sp	-3.84713
l9Sp	-1.76182
l1Sp	0.774624
l2Sp	2.39818
l3Sp	-0.271627
l4Sp	-4.40554
l5Sp	0
l6Sp	-1.80847
l7Sp	3.4751
l8Sp	0.134537
l9Sp	-2.03763
l1Sp	2.95448
l2Sp	-2.88426
l3Sp	2.33132
l4Sp	2.4886
l5Sp	-5.04954
l6Sp	5.67194
l7Sp	0
l8Sp	-1.73664
l9Sp	-5.66614
l1Sp	6.15524
l2Sp	-6.42366
l3Sp	0
l4Sp	1.53907
l5Sp	-12.1381
l6Sp	4.469
l7Sp	-3.53886
l8Sp	1.33065
l9Sp	-5.79889
l1Sp	-1.15601
l2Sp	0.276569
l3Sp	-2.55216
l4Sp	0.555862
l5Sp	0.70435
l6Sp	0
l7Sp	2.11212
l8Sp	-3.35029
l9Sp	-4.69633
l1Sp	3.99296
l2Sp	-1.92649
l3Sp	-5.02135
l4Sp	-4.2796
l5Sp	0
l6Sp	3.39068
l7Sp	1.44136
l8Sp	-0.572158
l9Sp	8.95334
l1Sp	-1.68347
l2Sp	6.16131
l3Sp	-1.41364
l4Sp	-0.101773
l5Sp	7.80854
l6Sp	5.30306
l7Sp	-0.917915
l8Sp	0
l9Sp	10.3894
l1Sp	0
l2Sp	-3.84262
l3Sp	1.52303
l4Sp	6.91002
l5Sp	-5.22009
l6Sp	1.82555
l7Sp	0.950097
l8Sp	-6.25352
l9Sp	-8.36084
l1Sp	-1.19443
l2Sp	0.0320328
l3Sp	-3.83853
l4Sp	-9.76598
l5Sp	4.16739
l6Sp	-3.72078
l7Sp	3.15997
l8Sp	3.09963
l9Sp	0
l1Sp	-0.556615
l2Sp	1.57915
l3Sp	-3.62498
l4Sp	5.88275
l5Sp	-5.32749
l6Sp	0
l7Sp	3.98256
l8Sp	8.75297
l9Sp	-1.32414
l1Sp	6.09365
l2Sp	5.71862
l3Sp	-0.821821
l4Sp	0
l5Sp	-1.35646
l6Sp	5.21829
l7Sp	0.137577
l8Sp	-5.59256
l9Sp	-1.50323
l1Sp	0
l2Sp	1.17754
l3Sp	-1.73191
l4Sp	-3.65964
l5Sp	1.67417
l6Sp	-1.4823
l7Sp	-1.75527
l8Sp	6.8411
l9Sp	8.97184
l1Sp	-4.60254
l2Sp	2.44313
l3Sp	-3.41523
l4Sp	-15.0489
l5Sp	6.43434
l6Sp	-7.93836
l7Sp	0
l8Sp	13.3496
l9Sp	0.642019
l1Sp	-8.43573
l2Sp	1.36479
l3Sp	2.43083
l4Sp	0.433642
l5Sp	-3.27128
l6Sp	0
l7Sp	-1.49231
l8Sp	3.93887
l9Sp	-3.22128
l1Sp	4.60417
l2Sp	-0.209623
l3Sp	4.95653
l4Sp	-7.10926
l5Sp	-6.89824
l6Sp	0
l7Sp	-3.72763
l8Sp	7.06428
l9Sp	3.72499
l1Sp	-3.78278
l2Sp	-1.91881
l3Sp	3.82746
l4Sp	2.31685
l5Sp	-3.74886
l6Sp	2.06745
l7Sp	0
l8Sp	8.85019
l9Sp	-1.91345
l1Sp	-10.3103
l2Sp	4.03844
l3Sp	5.22822
l4Sp	1.44065
l5Sp	-4.24182
l6Sp	0
l7Sp	-3.47843
l8Sp	6.48517
l9Sp	-4.94094
l1Sp	0
l2Sp	0.387399
l3Sp	0.592635
l4Sp	-3.79772
l5Sp	-3.76434
l6Sp	0.196516
l7Sp	0.31032
l8Sp	-0.271666
l9Sp	-2.11068
l1Sp	13.7477
l2Sp	-9.30673
l3Sp	2.20299
l4Sp	-9.23534
l5Sp	-20.4319
l6Sp	9.31492
l7Sp	0
l8Sp	0.341456
l9Sp	-3.62366
l1Sp	-4.15131
l2Sp	3.65713
l3Sp	0
l4Sp	-2.47563
l5Sp	-5.13383
l6Sp	-2.54604
l7Sp	4.20536
l8Sp	0.0754479
l9Sp	0.344278
l1Sp	2.19173
l2Sp	2.97224
l3Sp	-2.12199
l4Sp	-4.06711
l5Sp	-3.10076
l6Sp	2.04324
l7Sp	3.94026
l8Sp	-0.9066
l9Sp	0
l1Sp	3.9458
l2Sp	-0.895679
l3Sp	0
l4Sp	9.4379
l5Sp	5.12221
l6Sp	-9.43034
l7Sp	-2.92057
l8Sp	-0.849206
l9Sp	0.323955
l1Sp	7.00371
l2Sp	-4.63056
l3Sp	-0.198013
l4Sp	0.632581
l5Sp	-3.19521
l6Sp	7.58587
l7Sp	0
l8Sp	5.14
l9Sp	-2.31656
l1Sp	10.8566
l2Sp	0
l3Sp	-3.95045
l4Sp	8.85267
l5Sp	5.67313
l6Sp	-1.59784
l7Sp	-2.21817
l8Sp	-3.33571
l9Sp	8.00992
l1Sp	-0.104448
l2Sp	0.836906
l3Sp	0
l4Sp	5.636
l5Sp	9.78129
l6Sp	-14.2341
l7Sp	-3.5226
l8Sp	-0.833176
l9Sp	8.82943
l1Sp	-8.71053
l2Sp	2.30593
l3Sp	-4.85451
l4Sp	0.231449
l5Sp	4.28161
l6Sp	-6.18512
l7Sp	-7.07482
l8Sp	0
l9Sp	2.56601
l1Sp	-4.01254
l2Sp	-4.38932
l3Sp	1.07512
l4Sp	3.27667
l5Sp	1.10758
l6Sp	-3.20999
l7Sp	0
l8Sp	7.30085
l9Sp	-4.09362
l1Sp	0
l2Sp	-2.23028
l3Sp	0.708163
l4Sp	4.291
l5Sp	-9.79514
l6Sp	0.075825
l7Sp	0.633949
l8Sp	-4.70419
l9Sp	-10.1995
l1Sp	0.704555
l2Sp	0.851846
l3Sp	-1.37297
l4Sp	0
l5Sp	-3.15582
l6Sp	2.56445
l7Sp	-3.942
l8Sp	-3.17283
l9Sp	4.06915
l1Sp	-1.99709
l2Sp	4.515
l3Sp	5.44614
l4Sp	2.28015
l5Sp	-4.66315
l6Sp	0
l7Sp	0.687378
l8Sp	-3.38485
l9Sp	-5.22951
l1Sp	4.92577
l2Sp	0
l3Sp	3.66564
l4Sp	-3.0651
l5Sp	-4.96057
l6Sp	2.92529
l7Sp	-0.363314
l8Sp	0.965685
l9Sp	-1.79035
l1Sp	-2.12594
l2Sp	11.927
l3Sp	-5.33983
l4Sp	14.1088
l5Sp	0
l6Sp	1.98875
l7Sp	-3.53343
l8Sp	-8.59007
l9Sp	8.24645
l1Sp	2.67837
l2Sp	0.114678
l3Sp	-0.737124
l4Sp	-5.38468
l5Sp	-0.516949
l6Sp	1.97025
l7Sp	0
l8Sp	1.24537
l9Sp	-1.14066
l1Sp	4.11482
l2Sp	-0.841516
l3Sp	2.13689
l4Sp	-3.28468
l5Sp	-1.05955
l6Sp	3.28875
l7Sp	0
l8Sp	2.12747
l9Sp	-2.79475
l1Sp	-5.47523
l2Sp	-0.208402
l3Sp	-3.41347
l4Sp	4.55683
l5Sp	0.721043
l6Sp	-7.05341
l7Sp	0
l8Sp	0.266799
l9Sp	0.137067
l1Sp	12.4575
l2Sp	-1.44114
l3Sp	5.91918
l4Sp	-0.945898
l5Sp	-2.92149
l6Sp	9.70634
l7Sp	0
l8Sp	3.81335
l9Sp	-5.26235
l1Sp	-7.28488
l2Sp	3.20186
l3Sp	-2.4447
l4Sp	0
l5Sp	6.01542
l6Sp	-4.34651
l7Sp	-3.49776
l8Sp	2.78402
l9Sp	3.82287
l1Sp	-11.6264
l2Sp	2.77047
l3Sp	-12.4727
l4Sp	0
l5Sp	10.0641
l6Sp	-9.18483
l7Sp	-3.78769
l8Sp	0.537931
l9Sp	9.88243
l1Sp	5.35713
l2Sp	-4.17338
l3Sp	2.12688
l4Sp	4.11587
l5Sp	-3.45093
l6Sp	0
l7Sp	0.348837
l8Sp	-2.39057
l9Sp	-4.93643
l1Sp	-4.07622
l2Sp	-3.58225
l3Sp	0
l4Sp	7.39711
l5Sp	0.917022
l6Sp	-5.94186
l7Sp	-6.75809
l8Sp	9.14659
l9Sp	10.1553
l1Sp	10.4297
l2Sp	-9.32675
l3Sp	10.2237
l4Sp	1.47018
l5Sp	-16.2922
l6Sp	10.2929
l7Sp	0
l8Sp	-6.40797
l9Sp	-14.3317
l1Sp	11.2237
l2Sp	-7.75805
l3Sp	1.97832
l4Sp	-4.6958
l5Sp	0
l6Sp	1.10726
l7Sp	-2.3248
l8Sp	-4.27537
l9Sp	3.91961
l1Sp	-5.06438
l2Sp	1.04804
l3Sp	6.03335
l4Sp	9.59824
l5Sp	-1.34292
l6Sp	1.72757
l7Sp	-2.08874
l8Sp	0
l9Sp	-3.53068
l1Sp	0.362025
l2Sp	-0.139783
l3Sp	0
l4Sp	2.39693
l5Sp	-1.48678
l6Sp	10.7381
l7Sp	-0.361863
l8Sp	-0.473358
l9Sp	3.1988
l1Sp	1.85051
l2Sp	-2.22129
l3Sp	2.71634
l4Sp	-0.909894
l5Sp	-1.10738
l6Sp	2.47813
l7Sp	-0.501051
l8Sp	0
l9Sp	2.78
l1Sp	5.39323
l2Sp	-4.75567
l3Sp	1.66441
l4Sp	3.90055
l5Sp	-8.76589
l6Sp	14.5754
l7Sp	0
l8Sp	-2.35211
l9Sp	-1.27395
l1Sp	3.94477
l2Sp	-8.08762
l3Sp	2.73313
l4Sp	2.31333
l5Sp	-13.4545
l6Sp	0
l7Sp	-2.21492
l8Sp	0.131383
l9Sp	-2.20886
l1Sp	-1.27311
l2Sp	0
l3Sp	1.41144
l4Sp	-8.44954
l5Sp	10.8824
l6Sp	-7.25249
l7Sp	7.31364
l8Sp	14.7639
l9Sp	-0.977758
l1Sp	0
l2Sp	-3.85612
l3Sp	-5.92814
l4Sp	0.570277
l5Sp	21.6863
l6Sp	-4.83548
l7Sp	0.48603
l8Sp	-1.09234
l9Sp	3.72048
l1Sp	0.913993
l2Sp	-0.843684
l3Sp	-4.52576
l4Sp	-1.5223
l5Sp	6.83106
l6Sp	5.64649
l7Sp	-0.956903
l8Sp	0
l9Sp	7.75378
l1Sp	1.02708
l2Sp	0
l3Sp	-0.266921
l4Sp	-0.719538
l5Sp	-6.95697
l6Sp	4.3536
l7Sp	2.31672
l8Sp	-9.90572
l9Sp	0.0265624
l1Sp	5.54064
l2Sp	-0.297469
l3Sp	0
l4Sp	0.34746
l5Sp	-0.601227
l6Sp	0.0203778
l7Sp	4.00642
l8Sp	-0.481094
l9Sp	-4.14687
l1Sp	8.01033
l2Sp	-4.09717
l3Sp	0
l4Sp	-2.85975
l5Sp	-5.07137
l6Sp	5.36067
l7Sp	-0.322671
l8Sp	6.11356
l9Sp	9.23544
l1Sp	-3.29656
l2Sp	-2.0514
l3Sp	-4.34087
l4Sp	-2.03715
l5Sp	5.61958
l6Sp	0.454538
l7Sp	1.33481
l8Sp	0
l9Sp	9.90699
