# Supplementary material for: A robust method for measuring aminoacylation through tRNA-Seq
Source: eLife. 2024 Jul 30;12:RP91554. doi: 10.7554/eLife.91554 (PMC11288633; doi:10.7554/eLife.91554)
Supplement: Figure 5—figure supplement 1—source data 1. [file elife-91554-fig5-figsupp1-data1.xlsx]

## Sheet: Fig5S1
Predicted charge	Measured charge	Transcript
96.8984	96.6158	Best (Ile-AAT-5-4)
96.8279	96.6158	Best (Ile-AAT-5-4)
96.2285	96.6158	Best (Ile-AAT-5-4)
96.5085	96.6158	Best (Ile-AAT-5-4)
1.19787	0.989093	Best (Ile-AAT-5-4)
0.96694	0.989093	Best (Ile-AAT-5-4)
0.885268	0.989093	Best (Ile-AAT-5-4)
1.1041	0.989093	Best (Ile-AAT-5-4)
1.0833	0.989093	Best (Ile-AAT-5-4)
0.992683	0.989093	Best (Ile-AAT-5-4)
1.08046	0.989093	Best (Ile-AAT-5-4)
0.816378	0.989093	Best (Ile-AAT-5-4)
1.02477	0.989093	Best (Ile-AAT-5-4)
0.782816	0.989093	Best (Ile-AAT-5-4)
0.945435	0.989093	Best (Ile-AAT-5-4)
6.76833	6.95409	Best (Ile-AAT-5-4)
6.85686	6.95409	Best (Ile-AAT-5-4)
7.0526	6.95409	Best (Ile-AAT-5-4)
6.38317	6.95409	Best (Ile-AAT-5-4)
6.84451	6.95409	Best (Ile-AAT-5-4)
6.40042	6.95409	Best (Ile-AAT-5-4)
6.58518	6.95409	Best (Ile-AAT-5-4)
17.08	16.8992	Best (Ile-AAT-5-4)
17.8679	16.8992	Best (Ile-AAT-5-4)
16.3163	16.8992	Best (Ile-AAT-5-4)
17.5694	16.8992	Best (Ile-AAT-5-4)
17.3906	16.8992	Best (Ile-AAT-5-4)
16.2712	16.8992	Best (Ile-AAT-5-4)
16.2382	16.8992	Best (Ile-AAT-5-4)
28.8031	28.2703	Best (Ile-AAT-5-4)
28.4782	28.2703	Best (Ile-AAT-5-4)
27.9379	28.2703	Best (Ile-AAT-5-4)
27.6523	28.2703	Best (Ile-AAT-5-4)
27.8015	28.2703	Best (Ile-AAT-5-4)
28.5965	28.2703	Best (Ile-AAT-5-4)
27.5672	28.2703	Best (Ile-AAT-5-4)
43.0473	41.3979	Best (Ile-AAT-5-4)
41.6761	41.3979	Best (Ile-AAT-5-4)
41.3654	41.3979	Best (Ile-AAT-5-4)
39.6818	41.3979	Best (Ile-AAT-5-4)
41.1682	41.3979	Best (Ile-AAT-5-4)
42.702	41.3979	Best (Ile-AAT-5-4)
41.765	41.3979	Best (Ile-AAT-5-4)
57.0922	56.7229	Best (Ile-AAT-5-4)
57.1164	56.7229	Best (Ile-AAT-5-4)
55.5024	56.7229	Best (Ile-AAT-5-4)
56.9382	56.7229	Best (Ile-AAT-5-4)
57.1593	56.7229	Best (Ile-AAT-5-4)
56.6889	56.7229	Best (Ile-AAT-5-4)
74.8777	74.8474	Best (Ile-AAT-5-4)
74.784	74.8474	Best (Ile-AAT-5-4)
75.799	74.8474	Best (Ile-AAT-5-4)
75.5427	74.8474	Best (Ile-AAT-5-4)
73.444	74.8474	Best (Ile-AAT-5-4)
74.1476	74.8474	Best (Ile-AAT-5-4)
74.3389	74.8474	Best (Ile-AAT-5-4)
83.0104	81.8684	Worst (Ser-AGA-1-1)
81.9188	81.8684	Worst (Ser-AGA-1-1)
81.2007	81.8684	Worst (Ser-AGA-1-1)
81.3437	81.8684	Worst (Ser-AGA-1-1)
0.660308	0.64772	Worst (Ser-AGA-1-1)
1.0268	0.64772	Worst (Ser-AGA-1-1)
0.544606	0.64772	Worst (Ser-AGA-1-1)
0.591868	0.64772	Worst (Ser-AGA-1-1)
1.00769	0.64772	Worst (Ser-AGA-1-1)
0.409117	0.64772	Worst (Ser-AGA-1-1)
0.709026	0.64772	Worst (Ser-AGA-1-1)
0.44939	0.64772	Worst (Ser-AGA-1-1)
0.899129	0.64772	Worst (Ser-AGA-1-1)
0.515464	0.64772	Worst (Ser-AGA-1-1)
0.311526	0.64772	Worst (Ser-AGA-1-1)
6.59925	7.66823	Worst (Ser-AGA-1-1)
6.92172	7.66823	Worst (Ser-AGA-1-1)
7.28955	7.66823	Worst (Ser-AGA-1-1)
5.28435	7.66823	Worst (Ser-AGA-1-1)
6.6521	7.66823	Worst (Ser-AGA-1-1)
5.87792	7.66823	Worst (Ser-AGA-1-1)
5.86252	7.66823	Worst (Ser-AGA-1-1)
17.1454	18.6049	Worst (Ser-AGA-1-1)
16.4485	18.6049	Worst (Ser-AGA-1-1)
16.3354	18.6049	Worst (Ser-AGA-1-1)
17.0062	18.6049	Worst (Ser-AGA-1-1)
16.6867	18.6049	Worst (Ser-AGA-1-1)
16.622	18.6049	Worst (Ser-AGA-1-1)
15.5203	18.6049	Worst (Ser-AGA-1-1)
27.6243	30.0594	Worst (Ser-AGA-1-1)
27.3487	30.0594	Worst (Ser-AGA-1-1)
32.5551	30.0594	Worst (Ser-AGA-1-1)
25.4724	30.0594	Worst (Ser-AGA-1-1)
28.5399	30.0594	Worst (Ser-AGA-1-1)
31.3268	30.0594	Worst (Ser-AGA-1-1)
26.7436	30.0594	Worst (Ser-AGA-1-1)
41.873	42.0694	Worst (Ser-AGA-1-1)
40.3873	42.0694	Worst (Ser-AGA-1-1)
43.7855	42.0694	Worst (Ser-AGA-1-1)
36.7609	42.0694	Worst (Ser-AGA-1-1)
43.0476	42.0694	Worst (Ser-AGA-1-1)
41.3749	42.0694	Worst (Ser-AGA-1-1)
39.2427	42.0694	Worst (Ser-AGA-1-1)
56.1952	54.6764	Worst (Ser-AGA-1-1)
56.6265	54.6764	Worst (Ser-AGA-1-1)
51.0226	54.6764	Worst (Ser-AGA-1-1)
56.4264	54.6764	Worst (Ser-AGA-1-1)
57.8746	54.6764	Worst (Ser-AGA-1-1)
58.668	54.6764	Worst (Ser-AGA-1-1)
74.7109	67.9259	Worst (Ser-AGA-1-1)
72.8279	67.9259	Worst (Ser-AGA-1-1)
76.0712	67.9259	Worst (Ser-AGA-1-1)
71.5815	67.9259	Worst (Ser-AGA-1-1)
72.142	67.9259	Worst (Ser-AGA-1-1)
75.2967	67.9259	Worst (Ser-AGA-1-1)
73.4032	67.9259	Worst (Ser-AGA-1-1)
