# Supplementary material for: A robust method for measuring aminoacylation through tRNA-Seq
Source: eLife. 2024 Jul 30;12:RP91554. doi: 10.7554/eLife.91554 (PMC11288633; doi:10.7554/eLife.91554)
Supplement: Figure 5—figure supplement 2—source data 1. [file elife-91554-fig5-figsupp2-data1.xlsx]

## Sheet: Fig5S2A
run_v1	pred_err
FALSE	-0.346728
FALSE	-0.133999
FALSE	1.35452
FALSE	0.804586
FALSE	-0.588955
FALSE	-0.310677
FALSE	0.710519
FALSE	0.38766
FALSE	2.14364
FALSE	0.0550514
FALSE	1.29266
FALSE	0.127302
FALSE	0.838604
FALSE	0.248589
FALSE	0.797159
FALSE	0.63756
FALSE	0.0511428
FALSE	0.383031
FALSE	0.63604
FALSE	0.0744182
FALSE	0.0810144
FALSE	-0.135305
FALSE	0.265
FALSE	0.497467
FALSE	1.55657
FALSE	-0.327229
FALSE	0.351042
FALSE	0.291894
FALSE	0.195672
FALSE	0.0777809
FALSE	0.580545
FALSE	0.190931
FALSE	-0.228231
FALSE	-0.0172839
FALSE	0.0660554
FALSE	0.209502
FALSE	0.0818845
FALSE	0.054926
FALSE	0.390946
FALSE	0.37875
FALSE	0.361714
FALSE	0.311219
FALSE	0.0728261
FALSE	0.0490908
FALSE	0.633323
FALSE	0.402988
FALSE	-0.0615477
FALSE	0.384233
FALSE	0.860904
FALSE	0.426043
FALSE	0.520913
FALSE	0.317218
FALSE	0.392057
FALSE	0.810311
FALSE	0.244449
FALSE	-0.0455276
FALSE	0.71891
FALSE	0.631873
FALSE	0.377934
FALSE	0.22134
FALSE	0.673913
FALSE	0.678475
FALSE	0.678831
FALSE	0.375612
FALSE	0.180667
FALSE	0.663214
FALSE	-0.0942687
FALSE	0.433583
FALSE	0.581795
FALSE	0.042978
FALSE	-0.118441
FALSE	0.909412
FALSE	0.664304
FALSE	0.203285
FALSE	0.327421
FALSE	0.279309
FALSE	0.37016
FALSE	0.19251
FALSE	0.157459
FALSE	0.0910533
FALSE	0.437103
FALSE	-0.0919043
FALSE	0.233384
FALSE	0.28258
FALSE	-0.0207764
FALSE	0.141759
FALSE	1.28318
FALSE	0.348931
FALSE	0.648722
FALSE	0.207091
FALSE	-0.142092
FALSE	0.160399
FALSE	-0.0622525
FALSE	0.622771
FALSE	0.408384
FALSE	0.543825
FALSE	-0.778488
FALSE	-0.458414
FALSE	0.192836
FALSE	0.58055
FALSE	0.110797
FALSE	0.380046
FALSE	0.175163
FALSE	0.779204
FALSE	0.448462
FALSE	0.336137
FALSE	0.677302
FALSE	0.776402
FALSE	0.347938
FALSE	0.843874
FALSE	0.498604
FALSE	0.416503
FALSE	0.016966
FALSE	-0.148248
FALSE	0.516894
FALSE	0.0690145
FALSE	0.752121
FALSE	0.630167
FALSE	-0.326946
FALSE	0.25622
FALSE	0.947793
FALSE	1.14203
FALSE	0.690152
FALSE	-0.340096
FALSE	1.05185
FALSE	1.78226
FALSE	1.59824
FALSE	1.66746
FALSE	-0.777072
FALSE	1.55218
FALSE	1.60258
FALSE	0.256378
FALSE	0.569835
FALSE	-0.364573
FALSE	-0.0925904
FALSE	-0.301517
FALSE	0.193862
FALSE	0.896115
FALSE	0.50025
FALSE	1.20293
FALSE	0.297101
FALSE	1.12357
FALSE	-0.137294
FALSE	0.293865
FALSE	1.3677
FALSE	0.493418
FALSE	0.511828
FALSE	-0.637463
FALSE	0.339252
FALSE	0.247322
FALSE	0.189929
FALSE	0.347076
FALSE	-0.097447
FALSE	0.370316
FALSE	0.319295
FALSE	0.216174
FALSE	0.503752
FALSE	-0.0284886
FALSE	0.297725
FALSE	0.273088
FALSE	0.246724
FALSE	0.29295
FALSE	-0.566198
FALSE	0.625615
FALSE	-0.0306072
FALSE	-0.0465523
FALSE	1.13586
FALSE	0.227025
FALSE	-0.126145
FALSE	0.304484
FALSE	0.0960326
FALSE	0.0419562
FALSE	0.498717
FALSE	-0.0260599
FALSE	-0.180702
FALSE	-0.363444
FALSE	0.383185
FALSE	-0.0853013
FALSE	0.593819
FALSE	-0.0207144
FALSE	-0.250317
FALSE	0.397394
FALSE	-0.00948531
FALSE	0.535263
FALSE	0.4999
FALSE	0.356718
FALSE	0.693349
FALSE	1.0284
FALSE	0.309961
FALSE	0.201576
FALSE	0.266345
FALSE	0.177575
FALSE	-0.18478
FALSE	0.0582251
FALSE	0.128465
FALSE	0.245523
FALSE	0.0992302
FALSE	0.108107
FALSE	0.0234828
FALSE	-0.186918
FALSE	0.370294
FALSE	-0.00357544
FALSE	0.195165
FALSE	0.191817
FALSE	0.564302
FALSE	0.286028
FALSE	0.249213
FALSE	-0.226313
FALSE	-0.0539707
FALSE	-0.178038
FALSE	0.561655
FALSE	0.294799
FALSE	0.344873
FALSE	-0.252504
FALSE	-0.00983339
FALSE	0.132293
FALSE	0.145018
FALSE	-0.0888177
FALSE	-0.291568
FALSE	0.236306
FALSE	0.0269765
FALSE	0.344939
FALSE	0.442208
FALSE	1.27034
FALSE	0.468272
FALSE	0.317941
FALSE	0.662028
FALSE	-0.114998
FALSE	-0.0192202
FALSE	0.487452
FALSE	0.40983
FALSE	0.258226
FALSE	0.234257
FALSE	0.854895
FALSE	-0.150871
FALSE	0.372346
FALSE	0.0777109
FALSE	0.221079
FALSE	0.470821
FALSE	-0.151341
FALSE	0.119765
FALSE	-0.0324676
FALSE	0.423002
FALSE	0.459414
FALSE	-0.0335939
FALSE	0.21211
FALSE	0.312978
FALSE	-0.0898435
FALSE	-0.75468
FALSE	0.440339
FALSE	0.480782
FALSE	0.588561
FALSE	0.855893
FALSE	0.250462
FALSE	0.191505
FALSE	0.362272
FALSE	0.512204
FALSE	-0.00893084
FALSE	-0.147637
FALSE	0.285082
FALSE	-0.0143125
FALSE	0.183786
FALSE	0.0483212
FALSE	0.00275248
FALSE	-0.161585
FALSE	-0.166997
FALSE	-0.0645795
FALSE	0.0784486
FALSE	-0.0797295
FALSE	0.152633
FALSE	0.127716
FALSE	0.0160462
FALSE	-0.230846
FALSE	0.0880204
FALSE	0.548198
FALSE	0.328748
FALSE	0.0484075
FALSE	0.325416
FALSE	-0.472545
FALSE	0.760999
FALSE	0.836116
FALSE	-0.0418452
FALSE	-0.300253
FALSE	0.0504216
FALSE	0.612756
FALSE	0.390834
FALSE	0.241072
FALSE	-1.20788
FALSE	-0.282252
FALSE	-0.0259428
FALSE	-0.11534
FALSE	-0.0265859
FALSE	-0.377081
FALSE	0.072121
FALSE	0.795746
FALSE	0.595598
FALSE	0.773593
FALSE	1.26115
FALSE	0.5503
FALSE	-0.374262
FALSE	-0.194569
FALSE	1.45246
FALSE	0.511779
FALSE	0.020788
FALSE	1.25355
FALSE	0.381251
FALSE	0.50649
FALSE	0.584633
FALSE	0.940375
FALSE	0.59798
FALSE	-0.0275172
FALSE	0.360429
FALSE	-0.0391684
FALSE	0.0249467
FALSE	0.234726
FALSE	-0.0747613
FALSE	0.277363
FALSE	0.0631657
FALSE	-0.125151
FALSE	0.407162
FALSE	-0.699626
FALSE	0.197833
FALSE	-0.0178232
FALSE	0.0779678
FALSE	-0.0274355
FALSE	-0.291223
FALSE	-1.38645
FALSE	-0.404838
FALSE	-0.273893
FALSE	0.585259
FALSE	-0.61204
FALSE	-0.6705
FALSE	-0.99386
FALSE	-0.0526894
FALSE	-1.51308
FALSE	-0.39335
FALSE	-0.596157
FALSE	0.717986
FALSE	-1.18858
FALSE	-0.098459
FALSE	-1.90489
FALSE	-0.723347
FALSE	0.233754
FALSE	-0.619669
FALSE	-0.209888
FALSE	-0.276923
FALSE	-0.715438
FALSE	-1.06375
FALSE	-1.48247
FALSE	-0.194589
FALSE	-0.342184
FALSE	-0.307956
FALSE	-0.26861
FALSE	-0.163133
FALSE	0.00669345
FALSE	-0.0965103
FALSE	-0.164479
FALSE	-0.222691
FALSE	-0.119922
FALSE	-0.118831
FALSE	-0.337611
FALSE	-0.0640256
FALSE	-0.426473
FALSE	-0.172041
FALSE	-0.787241
FALSE	-0.297863
FALSE	0.300257
FALSE	-0.190231
FALSE	-0.413868
FALSE	-0.121823
FALSE	-0.0156951
FALSE	-0.139278
FALSE	-1.03678
FALSE	-0.421911
FALSE	-0.53421
FALSE	-0.139712
FALSE	0.284557
FALSE	-0.64194
FALSE	-0.312577
FALSE	-0.21491
FALSE	0.425282
FALSE	-0.949874
FALSE	-0.263402
FALSE	-0.812797
FALSE	-1.31876
FALSE	-1.20212
FALSE	-1.12077
FALSE	-0.960589
FALSE	-0.918443
FALSE	-0.721218
FALSE	-0.0153486
FALSE	-0.601888
FALSE	-0.500153
FALSE	-0.186947
FALSE	0.1992
FALSE	-1.19252
FALSE	-0.3299
FALSE	-0.288169
FALSE	-0.149763
FALSE	-0.437289
FALSE	-0.707193
FALSE	-0.0279234
FALSE	-0.244605
FALSE	-0.056491
FALSE	-0.915013
FALSE	-0.460524
FALSE	0.158692
FALSE	-0.387381
FALSE	0.101697
FALSE	-0.0756935
FALSE	-0.891506
FALSE	-0.526789
FALSE	-0.547714
FALSE	-0.300967
FALSE	-0.351838
FALSE	-0.010808
FALSE	0.557426
FALSE	-0.594
FALSE	-0.748377
FALSE	-0.169404
FALSE	0.0583431
FALSE	0.499786
FALSE	-0.26243
FALSE	-0.106299
FALSE	-0.34333
FALSE	-0.334256
FALSE	-0.230063
FALSE	-0.0202294
FALSE	-0.316289
FALSE	-0.205045
FALSE	0.005843
FALSE	-0.933517
FALSE	-0.4835
FALSE	-0.531947
FALSE	-0.289687
FALSE	-0.328516
FALSE	-1.18496
FALSE	0.10456
FALSE	0.0503114
FALSE	-0.171518
FALSE	0.357044
FALSE	-1.24036
FALSE	-0.399417
FALSE	-0.0197106
FALSE	-0.345578
FALSE	-0.667728
FALSE	-0.715713
FALSE	0.0712248
FALSE	-0.660746
FALSE	-1.55268
FALSE	0.161306
FALSE	-1.37241
FALSE	0.514002
FALSE	-0.161346
FALSE	-0.328779
FALSE	0.756289
FALSE	-0.777309
FALSE	-0.618153
FALSE	-2.17015
FALSE	-1.50242
FALSE	-1.70491
FALSE	-1.33572
FALSE	-2.03731
FALSE	-3.53368
FALSE	-1.06497
FALSE	-2.04877
FALSE	-1.07646
FALSE	-1.35844
FALSE	-1.59379
FALSE	-1.5372
FALSE	-2.3534
FALSE	-0.0760429
FALSE	-0.148296
FALSE	-0.112675
FALSE	-0.437311
FALSE	-0.234384
FALSE	-0.247463
FALSE	-0.327728
FALSE	-0.460782
FALSE	-0.287716
FALSE	-0.172225
FALSE	-0.282504
FALSE	-0.457032
FALSE	-0.225346
FALSE	0.0317967
FALSE	-0.201062
FALSE	0.940362
FALSE	-0.200393
FALSE	0.0625337
FALSE	-0.353195
FALSE	-0.273015
FALSE	-0.501608
FALSE	0.0276653
FALSE	-0.0216449
FALSE	-1.24581
FALSE	-0.0443182
FALSE	-0.278293
FALSE	0.292108
FALSE	-0.061745
FALSE	-0.603131
FALSE	0.00823875
FALSE	-0.453799
FALSE	1.25993
FALSE	0.36103
FALSE	-0.619477
FALSE	0.147857
FALSE	0.138359
FALSE	-0.123035
FALSE	-0.0494624
FALSE	0.209565
FALSE	-0.767446
FALSE	-0.506581
FALSE	-0.318819
FALSE	-0.185514
FALSE	-0.193406
FALSE	-0.0922228
FALSE	-0.402458
FALSE	-0.152646
FALSE	0.264245
FALSE	-0.00554839
FALSE	-0.0453636
FALSE	-0.198779
FALSE	0.232243
FALSE	0.196017
FALSE	-0.334768
FALSE	-0.203133
FALSE	0.230363
FALSE	-0.205173
FALSE	-0.937385
FALSE	-0.144888
FALSE	-0.468669
FALSE	-0.0548512
FALSE	0.131213
FALSE	-0.066917
FALSE	-0.385776
FALSE	-0.298932
FALSE	-0.331576
FALSE	0.0749983
FALSE	-0.66678
FALSE	-0.300664
FALSE	-0.0768907
FALSE	0.349255
FALSE	-0.852624
FALSE	0.0816951
FALSE	-0.141508
FALSE	0.246517
FALSE	0.202641
FALSE	-0.746693
FALSE	-0.0263365
FALSE	0.267036
FALSE	0.0757482
FALSE	0.173002
FALSE	0.128838
FALSE	-0.319147
FALSE	-0.491471
FALSE	-0.114256
FALSE	-0.315016
FALSE	-0.571791
FALSE	-0.183533
FALSE	-0.287461
FALSE	-0.255369
FALSE	-0.0630984
FALSE	-0.133788
FALSE	-0.0132454
FALSE	-0.0326191
FALSE	-0.00209461
FALSE	0.0549083
FALSE	0.0930147
FALSE	-0.358483
FALSE	-0.107308
FALSE	-0.393899
FALSE	0.0237781
FALSE	0.36301
FALSE	-0.262481
FALSE	-0.58179
FALSE	-0.494685
FALSE	-0.361962
FALSE	-0.400054
FALSE	-0.686679
FALSE	-0.391043
FALSE	-0.172211
FALSE	-0.365491
FALSE	0.867782
FALSE	-0.326454
FALSE	0.0839066
FALSE	-0.658037
FALSE	0.184212
FALSE	-0.0485432
FALSE	0.216485
FALSE	-0.591978
FALSE	-0.067593
FALSE	-0.20954
FALSE	-0.603415
FALSE	0.00448234
FALSE	0.00784605
FALSE	-0.327973
FALSE	0.0219291
FALSE	-0.176008
FALSE	0.619793
FALSE	-0.28506
FALSE	-0.615612
FALSE	-0.222913
FALSE	-0.63662
FALSE	-0.150807
FALSE	-0.109753
FALSE	-0.194664
FALSE	-0.301962
FALSE	-0.524728
FALSE	-0.587195
FALSE	-0.121962
FALSE	-0.632177
FALSE	0.978301
FALSE	-1.47729
FALSE	-0.269105
FALSE	0.37841
FALSE	-1.36425
FALSE	-0.89672
FALSE	-1.08479
FALSE	-0.588272
FALSE	0.387127
FALSE	1.48915
FALSE	0.542788
FALSE	0.960746
FALSE	0.81387
FALSE	1.73163
FALSE	0.8783
FALSE	0.256087
FALSE	0.904413
FALSE	-0.0397993
FALSE	0.683327
FALSE	-0.280398
FALSE	0.459154
FALSE	0.901198
FALSE	0.115526
FALSE	-0.163439
FALSE	-0.495075
FALSE	0.286551
FALSE	-0.137639
FALSE	0.110184
FALSE	0.0321727
FALSE	-0.135876
FALSE	0.00837636
FALSE	-0.206376
FALSE	-0.0961698
FALSE	0.858933
FALSE	-0.245575
FALSE	-0.260697
FALSE	-0.169856
TRUE	-0.125986
TRUE	0.200327
TRUE	0.191659
TRUE	0.274804
TRUE	0.661692
TRUE	-0.00763243
TRUE	0.0627595
TRUE	-0.527652
TRUE	0.146864
TRUE	-0.216656
TRUE	0.288531
TRUE	-0.0129116
TRUE	0.251741
TRUE	0.0221944
TRUE	-0.0206617
TRUE	0.186243
TRUE	-0.0406592
TRUE	-0.0780405
TRUE	0.195659
TRUE	-0.0539444
TRUE	0.150179
TRUE	-0.0271159
TRUE	0.000738129
TRUE	-0.127478
TRUE	-0.013721
TRUE	0.0154683
TRUE	0.0458725
TRUE	7.63105e-06
TRUE	-0.0361755
TRUE	-0.0516599
TRUE	-0.136152
TRUE	0.214542
TRUE	-0.0660028
TRUE	-0.0947122
TRUE	0.0532757
TRUE	0.0382602
TRUE	0.662913
TRUE	0.0836091
TRUE	0.123379
TRUE	0.0340143
TRUE	-0.00476363
TRUE	-0.0323952
TRUE	-0.0215557
TRUE	0.222948
TRUE	0.0209024
TRUE	0.00891126
TRUE	-0.019641
TRUE	0.0588045
TRUE	-0.251664
TRUE	-0.0425447
TRUE	-0.0852847
TRUE	-0.0653405
TRUE	0.24486
TRUE	0.0238615
TRUE	0.0803113
TRUE	0.0104514
TRUE	0.115124
TRUE	0.51168
TRUE	0.0302421
TRUE	0.0962732
TRUE	0.0289193
TRUE	-0.0542228
TRUE	0.484802
TRUE	0.127528
TRUE	0.128392
TRUE	0.208504
TRUE	0.338616
TRUE	0.273638
TRUE	0.536645
TRUE	0.0214327
TRUE	0.137798
TRUE	0.0877877
TRUE	0.163164
TRUE	-0.00254313
TRUE	-0.132019
TRUE	-0.148326
TRUE	-0.0999199
TRUE	0.163752
TRUE	0.018593
TRUE	0.161282
TRUE	-0.0528015
TRUE	-0.174157
TRUE	0.0386167
TRUE	0.208775
TRUE	-0.143018
TRUE	-0.075742
TRUE	0.108967
TRUE	0.190876
TRUE	0.263809
TRUE	0.0518279
TRUE	0.144087
TRUE	0.152612
TRUE	0.168644
TRUE	-0.0485142
TRUE	0.100676
TRUE	-0.112219
TRUE	0.14403
TRUE	-0.234175
TRUE	0.0244913
TRUE	0.076735
TRUE	-0.166163
TRUE	0.118984
TRUE	0.0267366
TRUE	0.0168112
TRUE	-0.0253478
TRUE	0.0919932
TRUE	0.00950721
TRUE	0.0755945
TRUE	0.0320373
TRUE	-0.0394234
TRUE	0.154885
TRUE	0.251103
TRUE	0.057315
TRUE	0.232796
TRUE	0.162274
TRUE	0.103993
TRUE	0.0607041
TRUE	0.172258
TRUE	0.13337
TRUE	0.18103
TRUE	0.0191927
TRUE	0.0125879
TRUE	0.159368
TRUE	0.0674985
TRUE	0.0272714
TRUE	-0.184867
TRUE	-0.190776
TRUE	-0.0154254
TRUE	-0.0602532
TRUE	0.0976228
TRUE	-0.0874288
TRUE	0.160371
TRUE	-0.134282
TRUE	0.315878
TRUE	0.393159
TRUE	0.0642565
TRUE	-0.0375813
TRUE	0.65876
TRUE	-0.286077
TRUE	-0.113107
TRUE	0.0392186
TRUE	0.0102316
TRUE	0.390577
TRUE	0.248393
TRUE	0.305162
TRUE	0.266344
TRUE	0.274063
TRUE	0.0660236
TRUE	0.354336
TRUE	-0.10739
TRUE	0.242621
TRUE	0.020597
TRUE	-0.115176
TRUE	0.00822609
TRUE	0.108506
TRUE	0.0283437
TRUE	0.0731918
TRUE	-0.0489
TRUE	0.0385634
TRUE	-0.0170583
TRUE	0.314114
TRUE	0.11873
FALSE	0.547819
FALSE	0.064088
FALSE	-0.00326015
FALSE	0.235341
FALSE	0.416159
FALSE	0.296297
FALSE	0.270027
FALSE	0.185755
FALSE	0.590517
FALSE	0.316242
FALSE	0.245205
FALSE	0.325288
FALSE	0.36628
FALSE	0.562466
FALSE	0.321584
FALSE	0.207414
FALSE	0.731198
FALSE	0.799346
FALSE	0.497208
FALSE	0.477537
FALSE	0.258369
FALSE	0.268507
FALSE	0.523164
FALSE	0.675222
FALSE	0.150328
FALSE	0.206184
FALSE	0.463292
FALSE	0.222268
FALSE	0.613959
FALSE	0.159527
FALSE	0.561957
FALSE	0.422874
FALSE	0.674793
FALSE	0.268799
FALSE	0.226974
FALSE	0.296089
FALSE	0.506698
FALSE	0.206073
FALSE	0.285837
FALSE	0.230668
FALSE	0.649932
FALSE	0.425389
FALSE	0.481355
FALSE	0.42323
FALSE	0.637204
FALSE	0.58172
FALSE	0.174641
FALSE	0.186763
FALSE	0.634999
FALSE	0.491943
FALSE	0.662781
FALSE	0.474387
FALSE	0.340218
FALSE	0.532622
FALSE	0.151014
FALSE	0.161438
FALSE	0.0243188
FALSE	0.559181
FALSE	0.307278
FALSE	0.132621
FALSE	0.293534
FALSE	0.094191
FALSE	-0.230252
FALSE	0.23549
FALSE	0.434212
FALSE	0.320998
FALSE	0.240809
FALSE	0.305779
FALSE	-0.114895
FALSE	0.403728
FALSE	0.544062
FALSE	0.37451
FALSE	0.243596
FALSE	0.192293
FALSE	0.464374
FALSE	0.695691
FALSE	0.382418
FALSE	0.187135
FALSE	0.170242
FALSE	0.0869602
FALSE	0.200576
FALSE	0.406806
FALSE	0.339615
FALSE	-0.0221531
FALSE	0.232348
FALSE	0.0190801
FALSE	0.153674
FALSE	0.68473
FALSE	0.298129
FALSE	0.283039
FALSE	0.121201
FALSE	0.0839423
FALSE	0.108967
FALSE	0.517182
FALSE	0.202154
FALSE	0.33041
FALSE	0.162188
FALSE	0.220234
FALSE	0.510091
FALSE	0.349732
FALSE	0.200669
FALSE	0.200442
FALSE	0.261188
FALSE	0.0188604
FALSE	0.442833
FALSE	-0.0853375
FALSE	0.454036
FALSE	0.240132
FALSE	0.0146936
FALSE	0.536892
FALSE	0.42179
FALSE	-0.252406
FALSE	-0.666273
FALSE	0.0807386
FALSE	0.0972918
FALSE	0.0766704
FALSE	0.247434
FALSE	-0.0711586
FALSE	0.104184
FALSE	0.0537943
FALSE	0.51765
FALSE	0.379077
FALSE	0.108925
FALSE	0.0568919
FALSE	0.619319
FALSE	0.708516
FALSE	0.357595
FALSE	0.164243
FALSE	0.12442
FALSE	0.444908
FALSE	-0.0522539
FALSE	-0.0736742
FALSE	0.421192
FALSE	0.13664
FALSE	0.251458
FALSE	0.489142
FALSE	0.743278
FALSE	0.398277
FALSE	-0.237479
FALSE	0.102075
FALSE	0.0552106
FALSE	-0.00985363
FALSE	0.3035
FALSE	0.289002
FALSE	0.20556
FALSE	0.373069
FALSE	0.194774
FALSE	0.209403
FALSE	0.067674
FALSE	0.486966
FALSE	-0.000357852
FALSE	0.436649
FALSE	0.0711735
FALSE	0.305081
FALSE	0.273305
FALSE	0.149152
FALSE	0.352521
FALSE	0.237932
FALSE	0.104696
FALSE	-0.111078
FALSE	-0.0118836
FALSE	0.203944
TRUE	-0.125234
TRUE	-0.107692
TRUE	0.304358
TRUE	0.254952
TRUE	-0.147983
TRUE	0.020197
TRUE	0.151794
TRUE	0.130112
TRUE	-0.048086
TRUE	0.733665
TRUE	0.151696
TRUE	0.119222
TRUE	0.0522062
TRUE	0.778602
TRUE	0.220428
TRUE	-0.111046
TRUE	-0.393781
TRUE	0.261811
TRUE	-0.149461
TRUE	0.0363804
TRUE	0.0123759
TRUE	0.292134
TRUE	0.296452
TRUE	0.129682
TRUE	0.0775748
TRUE	-0.264266
TRUE	-0.0648055
TRUE	0.0998906
TRUE	-0.0349734
TRUE	0.0607409
TRUE	0.0670191
TRUE	-0.0460172
TRUE	0.187033
TRUE	0.0121448
TRUE	-0.0178685
TRUE	-0.0947464
TRUE	-0.0394361
TRUE	0.15026
TRUE	0.219391
TRUE	0.0706945
TRUE	-0.0598455
TRUE	-0.0187295
TRUE	-0.113498
TRUE	0.248912
TRUE	0.189602
TRUE	-0.0461778
TRUE	0.241416
TRUE	-0.0466392
TRUE	-0.0321064
TRUE	0.00373565
TRUE	-0.142189
TRUE	-0.0780595
TRUE	-0.054242
TRUE	-0.0825192
TRUE	0.125314
TRUE	0.00775604
TRUE	0.140389
TRUE	-0.178671
TRUE	-0.0027948
TRUE	0.310532
TRUE	0.514182
TRUE	0.193473
TRUE	0.245144
TRUE	0.108172
TRUE	-0.15181
TRUE	-0.0965554
TRUE	0.102852
TRUE	0.0855762
TRUE	0.385633
TRUE	0.0137455
TRUE	-0.0714547
TRUE	0.0584851
TRUE	-0.0105844
TRUE	0.0185029
TRUE	0.0286549
TRUE	-0.161153
TRUE	0.181919
TRUE	0.125028
TRUE	0.106563
TRUE	0.225913
TRUE	-0.00145093
TRUE	0.115609
TRUE	0.143121
TRUE	-0.103826
TRUE	0.161757
TRUE	0.016237
TRUE	-0.19135
TRUE	-0.0469199
TRUE	-0.0302819
TRUE	0.103112
TRUE	0.0957945
TRUE	0.119279
TRUE	-0.0420263
TRUE	0.0120004
TRUE	0.0767601
TRUE	-0.0172373
TRUE	-0.310402
TRUE	0.0790477
TRUE	0.0152909
TRUE	0.016623
TRUE	0.120703
TRUE	-0.0554239
TRUE	0.0209187
TRUE	0.157421
TRUE	0.0322067
TRUE	0.0301554
TRUE	0.0828908
TRUE	-0.0717231
TRUE	-0.0232346
TRUE	0.0528386
TRUE	0.044054
TRUE	0.185019
TRUE	0.163193
TRUE	-0.0534144
TRUE	-0.0375891
TRUE	0.157775
TRUE	-0.0790074
TRUE	-0.105856
TRUE	0.0378647
TRUE	-0.0180931
TRUE	-0.267741
TRUE	-0.103114
TRUE	0.0604491
TRUE	0.0212768
TRUE	-0.0539574
TRUE	-0.119375
TRUE	-0.0604028
TRUE	-0.0547875
TRUE	0.0834139
TRUE	-0.124781
TRUE	-0.0244548
TRUE	-0.00125624
TRUE	0.0105165
TRUE	0.0934169
TRUE	0.0547773
TRUE	0.1886
TRUE	0.001172
TRUE	-0.206519
TRUE	0.323207
TRUE	0.361437
TRUE	0.0299013
TRUE	0.314653
TRUE	0.104168
TRUE	-0.0713889
TRUE	0.0072841
TRUE	0.0450069
TRUE	0.036181
TRUE	0.0890699
TRUE	0.355688
TRUE	0.212644
TRUE	0.281542
TRUE	-0.00812179
TRUE	0.186428
TRUE	0.13704
TRUE	-0.0337776
TRUE	0.0844736
TRUE	0.114588
TRUE	0.0122041
TRUE	-0.35399
TRUE	0.257954
TRUE	0.270302
TRUE	0.0627969
FALSE	-0.00686101
FALSE	0.311583
FALSE	0.267873
FALSE	-0.0187926
FALSE	0.130203
FALSE	-0.0991974
FALSE	0.244917
FALSE	0.0961999
FALSE	-0.0476563
FALSE	0.0162964
FALSE	0.221645
FALSE	0.340238
FALSE	0.143238
FALSE	-0.472855
FALSE	0.0786334
FALSE	-0.0103759
FALSE	-0.112789
FALSE	-0.16541
FALSE	-0.0417513
FALSE	0.169055
FALSE	-0.0579032
FALSE	-0.00434242
FALSE	0.0294645
FALSE	0.0685136
FALSE	0.512086
FALSE	0.0861621
FALSE	0.200288
FALSE	0.0442991
FALSE	0.151702
FALSE	-0.123308
FALSE	-0.0193038
FALSE	0.177135
FALSE	-0.145378
FALSE	0.0791422
FALSE	-0.0906457
FALSE	0.14067
FALSE	-0.106272
FALSE	0.0566063
FALSE	-0.0452189
FALSE	0.145496
FALSE	0.0092814
FALSE	0.0516997
FALSE	0.0629452
FALSE	-0.0436367
FALSE	-0.149821
FALSE	0.205443
FALSE	0.0298574
FALSE	0.144061
FALSE	0.317363
FALSE	0.0924615
FALSE	0.051259
FALSE	0.119082
FALSE	-0.212655
FALSE	0.232836
FALSE	0.0739168
FALSE	-0.0128127
FALSE	-0.0590069
FALSE	0.0354683
FALSE	0.198658
FALSE	0.15189
FALSE	0.334482
FALSE	0.134501
FALSE	0.158185
FALSE	0.0445286
FALSE	0.258338
FALSE	0.0137644
FALSE	-0.127366
FALSE	-0.100953
FALSE	0.0292936
FALSE	0.0817158
FALSE	0.0975433
FALSE	0.00860571
FALSE	0.0378096
FALSE	0.183316
FALSE	0.0646282
FALSE	0.261889
FALSE	0.153461
FALSE	-0.114517
FALSE	0.206029
FALSE	-0.0330632
FALSE	0.0851913
FALSE	-0.00280143
FALSE	-0.072028
FALSE	0.115008
FALSE	0.150768
FALSE	0.38731
FALSE	0.0429988
FALSE	-0.0171063
FALSE	0.0108097
FALSE	0.18353
FALSE	0.132386
FALSE	0.106192
FALSE	0.308954
FALSE	0.126889
FALSE	0.0193503
FALSE	-0.0469808
FALSE	0.122841
FALSE	0.160586
FALSE	0.0563778
FALSE	-0.0792599
FALSE	0.0830934
FALSE	0.215023
FALSE	0.135537
FALSE	0.220019
FALSE	0.102299
FALSE	0.274568
FALSE	0.0223672
FALSE	0.0288579
FALSE	0.0951882
FALSE	0.0630614
FALSE	-0.0857526
FALSE	0.0443588
FALSE	-0.0110235
FALSE	0.0761599
FALSE	0.0589358
FALSE	-0.0137017
FALSE	0.214158
FALSE	0.0699923
FALSE	0.11079
FALSE	0.00726631
FALSE	0.0893483
FALSE	-0.055852
FALSE	0.120367
FALSE	-0.0568855
FALSE	0.404321
FALSE	0.0708576
FALSE	0.176506
FALSE	0.022975
FALSE	0.0653333
FALSE	0.16608
FALSE	-0.0348819
FALSE	0.345717
FALSE	0.307763
FALSE	0.154606
FALSE	0.0812485
FALSE	0.544603
FALSE	0.0940207
FALSE	0.00384687
FALSE	0.743222
FALSE	0.061305
FALSE	0.204648
FALSE	0.0836576
FALSE	0.226124
FALSE	-0.045035
FALSE	-0.0446506
FALSE	0.126401
FALSE	0.280966
FALSE	0.221971
FALSE	-0.287429
FALSE	-0.0362875
FALSE	-0.31884
FALSE	0.0756812
FALSE	0.0548483
FALSE	0.336926
FALSE	0.390361
FALSE	0.0386441
FALSE	0.07897
FALSE	0.181557
FALSE	-0.184541
FALSE	0.276224
FALSE	-0.0299746
FALSE	0.0477931
FALSE	-0.208227
FALSE	-0.21405
FALSE	-0.0563884
FALSE	0.124413
FALSE	-0.0334872
FALSE	0.0224281
FALSE	0.233107
FALSE	-0.0275422
FALSE	0.0423122
FALSE	-0.477754
FALSE	0.0952135
FALSE	0.345134
FALSE	-0.0287413
FALSE	-0.231723
FALSE	0.447557
FALSE	0.201343
FALSE	0.290905
FALSE	-0.0230496
FALSE	0.112846
FALSE	0.146947
FALSE	-0.0129963
FALSE	0.110087
FALSE	0.0840217
FALSE	-0.134966
FALSE	0.469307
FALSE	0.114336
FALSE	0.0609536
FALSE	0.048626
FALSE	-0.0506477
FALSE	0.366567
FALSE	0.106933
FALSE	0.00126785
FALSE	0.0161991
FALSE	0.170673
FALSE	0.173365
FALSE	0.0534212
FALSE	-0.28928
FALSE	0.0298299
FALSE	0.0224263
FALSE	0.0766605
FALSE	0.00712604
FALSE	0.0878816
FALSE	0.0511708
FALSE	0.020326
FALSE	-0.0409126
FALSE	-0.0738611
FALSE	0.146932
FALSE	0.0518894
FALSE	-0.194285
FALSE	0.0226259
FALSE	0.153888
FALSE	0.0572282
FALSE	-0.118998
FALSE	0.0205075
FALSE	0.0853824
FALSE	0.00183705
FALSE	-0.0901059
FALSE	-0.33604
FALSE	0.0729628
FALSE	-0.26229
FALSE	-0.0559212
FALSE	0.136957
FALSE	-0.0288418
FALSE	-0.0499761
FALSE	0.118778
FALSE	0.735513
FALSE	0.0343332
FALSE	0.201089
FALSE	-0.106077
FALSE	0.114978
FALSE	-0.0755317
FALSE	-0.0609675
FALSE	-0.0818649
FALSE	0.00705143
FALSE	-0.0363465
FALSE	0.204658
FALSE	-0.127988
FALSE	0.228335
FALSE	0.000755964
FALSE	0.073041
FALSE	0.0331959
FALSE	0.0444052
FALSE	-0.022204
FALSE	0.0942106
FALSE	0.125669
FALSE	0.190819
FALSE	0.939297
FALSE	0.0476089
FALSE	0.198807
FALSE	0.0653085
FALSE	-0.106371
FALSE	0.0629029
FALSE	0.0712368
FALSE	0.0113804
FALSE	0.0190915
FALSE	0.104095
FALSE	0.405359
FALSE	0.401894
FALSE	0.156572
FALSE	0.0930829
FALSE	0.0829373
FALSE	0.00336675
FALSE	0.239744
FALSE	0.0981892
FALSE	0.0440075
FALSE	0.285177
FALSE	0.237217
FALSE	0.293603
FALSE	0.132967
FALSE	-0.016359
FALSE	-0.0187633
FALSE	-0.0567361
FALSE	0.0304086
FALSE	0.126732
FALSE	0.141524
FALSE	-0.0381484
FALSE	0.0435012
FALSE	0.0850248
FALSE	-0.0177325
FALSE	0.101307
FALSE	-0.00149181
FALSE	0.35997
FALSE	-0.0407228
FALSE	-0.118969
FALSE	0.156437
FALSE	-0.116413
FALSE	0.0679565
FALSE	-0.0305068
FALSE	0.14071
FALSE	-0.0399864
FALSE	0.312538
FALSE	-0.281168
FALSE	0.405728
FALSE	0.0024886
FALSE	0.0243913
FALSE	-0.239197
FALSE	0.267636
FALSE	-0.475833
FALSE	-0.090554
FALSE	-0.223945
FALSE	0.139982
FALSE	-0.0982076
FALSE	0.313869
FALSE	-0.00656595
FALSE	-0.0366486
FALSE	-0.0255206
FALSE	-0.0969485
FALSE	-0.00639184
FALSE	0.151183
FALSE	-0.00503038
FALSE	0.0699687
FALSE	0.0236928
FALSE	-0.0450857
FALSE	0.0522516
FALSE	0.47431
FALSE	0.0665148
FALSE	0.0326239
FALSE	0.45025
FALSE	0.279512
FALSE	0.263048
FALSE	0.168675
FALSE	0.0565852
TRUE	0.0924714
TRUE	0.133819
TRUE	0.265319
TRUE	0.0356832
TRUE	-0.0313073
TRUE	-0.365249
TRUE	-0.0724819
TRUE	0.40883
TRUE	-0.0500567
TRUE	0.363175
TRUE	0.000317912
TRUE	-0.0627234
TRUE	-0.109902
TRUE	0.426554
TRUE	0.0123809
TRUE	-0.0833186
TRUE	-0.307675
TRUE	0.0537337
TRUE	-0.036646
TRUE	-0.0433505
TRUE	-0.161548
TRUE	0.00304941
TRUE	-0.200885
TRUE	-0.0723035
TRUE	-0.0509597
TRUE	-0.0903677
TRUE	-0.0621805
TRUE	-0.0891477
TRUE	-0.100898
TRUE	0.0404189
TRUE	-0.184714
TRUE	-0.126534
TRUE	-0.212538
TRUE	-0.0323791
TRUE	-0.145274
TRUE	-0.136983
TRUE	0.187406
TRUE	0.025088
TRUE	-0.12529
TRUE	-0.00370428
TRUE	0.0227034
TRUE	0.0546044
TRUE	0.163069
TRUE	0.0793651
TRUE	-0.0203588
TRUE	0.0987641
TRUE	-0.0168861
TRUE	-0.0862466
TRUE	-0.0634618
TRUE	-0.0363306
TRUE	0.016363
TRUE	0.232488
TRUE	0.211475
TRUE	-0.152245
TRUE	0.0199332
TRUE	-0.0502178
TRUE	0.20043
TRUE	0.310771
TRUE	0.0629198
TRUE	-0.0820291
TRUE	-0.374824
TRUE	0.50519
TRUE	-0.171227
TRUE	-0.0368434
TRUE	-0.136004
TRUE	-0.21624
TRUE	0.134902
TRUE	-0.105059
TRUE	-0.406112
TRUE	0.0541385
TRUE	-0.0222652
TRUE	0.00329603
TRUE	0.0171978
TRUE	0.083249
TRUE	-0.0649003
TRUE	-0.0979837
TRUE	-0.000218847
TRUE	0.013553
TRUE	-0.104278
TRUE	0.168402
TRUE	0.0330392
TRUE	0.150048
TRUE	0.312572
TRUE	0.00358937
TRUE	-0.0689546
TRUE	-0.024436
TRUE	0.459144
TRUE	-0.110457
TRUE	-0.114331
TRUE	-0.154102
TRUE	0.111435
TRUE	0.148713
TRUE	-0.0585589
TRUE	0.00803487
TRUE	-0.0538756
TRUE	-0.00438688
TRUE	0.00252439
TRUE	0.0600513
TRUE	-0.194255
TRUE	0.0282487
TRUE	-0.0027621
TRUE	0.0271242
TRUE	0.241756
TRUE	0.155722
TRUE	0.0417664
TRUE	-0.000996733
TRUE	-0.0845712
TRUE	0.00139179
TRUE	0.00906453
TRUE	-0.176623
TRUE	-0.0371038
TRUE	-0.206148
TRUE	0.713739
TRUE	-0.0558882
TRUE	-0.0256831
TRUE	0.1245
TRUE	-0.194412
TRUE	-0.212381
TRUE	-0.0949934
TRUE	-0.0809758
TRUE	-0.0544766
TRUE	-0.238603
TRUE	0.0198743
TRUE	0.000768476
TRUE	-0.234878
TRUE	0.198344
TRUE	-0.0334799
TRUE	-0.0509163
TRUE	-0.195195
TRUE	0.0862132
TRUE	-0.111475
TRUE	-0.0194868
TRUE	-0.198762
TRUE	0.0131127
TRUE	-0.12154
TRUE	0.199339
TRUE	0.0420411
TRUE	0.322132
TRUE	0.166383
TRUE	0.0559105
TRUE	-0.148843
TRUE	-0.198482
TRUE	-0.203328
TRUE	0.0145706
TRUE	-0.0243991
TRUE	-0.0705436
TRUE	-0.16264
TRUE	-0.30327
TRUE	-0.297475
TRUE	-0.130118
TRUE	0.141349
TRUE	-0.0128956
TRUE	-0.0546317
TRUE	0.0518136
TRUE	-0.059511
TRUE	-0.0588124
TRUE	-0.0495557
TRUE	0.00189338
TRUE	0.107939
TRUE	0.176581
TRUE	-0.200682
TRUE	-0.0248493
FALSE	0.13795
FALSE	-0.0726887
FALSE	-0.116314
FALSE	-0.315933
FALSE	0.119867
FALSE	0.452655
FALSE	-0.0677798
FALSE	-0.218217
FALSE	-0.0538669
FALSE	-0.13395
FALSE	0.142917
FALSE	-0.229549
FALSE	-0.134599
FALSE	-0.579644
FALSE	0.181949
FALSE	0.0973797
FALSE	-0.150632
FALSE	0.0759287
FALSE	0.119584
FALSE	0.0945383
FALSE	-0.0151668
FALSE	0.0392844
FALSE	0.0660294
FALSE	0.169005
FALSE	0.135292
FALSE	-0.143711
FALSE	0.0204862
FALSE	0.181823
FALSE	-0.019255
FALSE	0.0299337
FALSE	0.37878
FALSE	-0.0679643
FALSE	-0.0562221
FALSE	0.0673502
FALSE	-0.0308062
FALSE	0.0857634
FALSE	0.257056
FALSE	0.0745234
FALSE	0.00778984
FALSE	-0.078434
FALSE	0.0277114
FALSE	-0.000249854
FALSE	-0.053064
FALSE	-0.131389
FALSE	0.00391267
FALSE	0.101559
FALSE	0.122879
FALSE	0.151214
FALSE	-0.17152
FALSE	-0.0135311
FALSE	-0.0243538
FALSE	-0.100745
FALSE	-0.06385
FALSE	0.0306234
FALSE	0.0362688
FALSE	-0.0205948
FALSE	0.146568
FALSE	0.00544045
FALSE	-0.00641626
FALSE	0.15351
FALSE	-0.00377877
FALSE	-0.151959
FALSE	0.187427
FALSE	0.12129
FALSE	0.0798339
FALSE	0.179134
FALSE	0.0617345
FALSE	-0.0835694
FALSE	-0.0256406
FALSE	-0.0599494
FALSE	-0.0310684
FALSE	-0.0591994
FALSE	-0.0746591
FALSE	0.00365735
FALSE	0.0688783
FALSE	0.140095
FALSE	0.11992
FALSE	-0.0547139
FALSE	0.118168
FALSE	0.0122625
FALSE	0.0817213
FALSE	-0.165636
FALSE	-0.165999
FALSE	0.0913713
FALSE	-0.0391677
FALSE	-0.236744
FALSE	-0.13861
FALSE	-0.13094
FALSE	-0.148329
FALSE	0.112173
FALSE	-0.0581868
FALSE	-0.0237155
FALSE	0.0373522
FALSE	0.0602329
FALSE	0.0956
FALSE	0.233973
FALSE	0.0367858
FALSE	0.000444534
FALSE	0.167451
FALSE	-0.0328962
FALSE	0.144219
FALSE	0.0490813
FALSE	-0.0894816
FALSE	-0.274018
FALSE	-0.0377813
FALSE	0.115766
FALSE	0.0267057
FALSE	0.185444
FALSE	0.0224655
FALSE	0.128399
FALSE	0.0863185
FALSE	0.23789
FALSE	-0.818515
FALSE	0.0648823
FALSE	0.0050701
FALSE	-0.00290135
FALSE	-0.06532
FALSE	0.127622
FALSE	0.0507047
FALSE	0.0560041
FALSE	0.214836
FALSE	0.0613062
FALSE	0.097605
FALSE	0.155346
FALSE	-0.180714
FALSE	-0.210075
FALSE	0.213452
FALSE	0.178403
FALSE	0.0390148
FALSE	-0.135312
FALSE	0.116352
FALSE	0.0521934
FALSE	0.187437
FALSE	0.00194092
FALSE	0.0837101
FALSE	0.0814881
FALSE	-0.323466
FALSE	0.145435
FALSE	0.137753
FALSE	0.627748
FALSE	0.261708
FALSE	0.309381
FALSE	0.0792534
FALSE	0.0826243
FALSE	0.0236867
FALSE	0.0563193
FALSE	0.134034
FALSE	0.432896
FALSE	0.220303
FALSE	0.0481293
FALSE	-0.091397
FALSE	-0.00972403
FALSE	0.189757
FALSE	-0.109588
FALSE	0.0151214
FALSE	0.136364
FALSE	0.0852915
FALSE	0.0976995
FALSE	0.0501173
FALSE	-0.11288
FALSE	-0.0726001
FALSE	0.0525832
TRUE	-0.302049
TRUE	0.060866
TRUE	-0.190443
TRUE	-0.161446
TRUE	0.0839696
TRUE	-0.0197463
TRUE	-0.266799
TRUE	-0.158928
TRUE	-0.12754
TRUE	-0.0780395
TRUE	-0.448657
TRUE	-0.222878
TRUE	-0.0922642
TRUE	-0.302249
TRUE	-0.223836
TRUE	-0.108637
TRUE	0.0682794
TRUE	-0.388339
TRUE	-0.157256
TRUE	-0.181751
TRUE	-0.164817
TRUE	-0.101816
TRUE	-0.156059
TRUE	-0.1816
TRUE	-0.239365
TRUE	0.0710477
TRUE	-0.17474
TRUE	-0.182093
TRUE	-0.13712
TRUE	-0.167434
TRUE	-0.377646
TRUE	-0.0549793
TRUE	-0.192053
TRUE	-0.0459888
TRUE	-0.0834797
TRUE	-0.08997
TRUE	-0.419523
TRUE	-0.112449
TRUE	-0.113494
TRUE	-0.117655
TRUE	-0.249471
TRUE	0.0519017
TRUE	-0.0762958
TRUE	-0.0388357
TRUE	-0.10422
TRUE	-0.216094
TRUE	-0.101115
TRUE	0.048172
TRUE	-0.252099
TRUE	-0.145538
TRUE	-0.17025
TRUE	-0.175234
TRUE	-0.187652
TRUE	-0.202151
TRUE	-0.125139
TRUE	-0.0863888
TRUE	-0.187244
TRUE	-0.183673
TRUE	-0.22409
TRUE	-0.00714385
TRUE	-0.14275
TRUE	-0.485653
TRUE	0.224597
TRUE	-0.0831538
TRUE	-0.134252
TRUE	-0.322119
TRUE	-0.157049
TRUE	-0.258806
TRUE	-0.0476701
TRUE	-0.163992
TRUE	-0.144156
TRUE	-0.141954
TRUE	-0.128527
TRUE	-0.171079
TRUE	-0.0365989
TRUE	-0.269212
TRUE	-0.149488
TRUE	-0.181495
TRUE	-0.162856
TRUE	-0.225195
TRUE	-0.0980952
TRUE	0.0170662
TRUE	-0.114354
TRUE	-0.172715
TRUE	0.0336449
TRUE	-0.407666
TRUE	-0.210056
TRUE	-0.181559
TRUE	-0.15653
TRUE	-0.14351
TRUE	-0.0640891
TRUE	-0.126582
TRUE	-0.138787
TRUE	-0.185045
TRUE	-0.00754348
TRUE	-0.10145
TRUE	-0.0787839
TRUE	-0.316273
TRUE	-0.164848
TRUE	-0.160544
TRUE	-0.119927
TRUE	-0.146118
TRUE	-0.123102
TRUE	0.0299282
TRUE	-0.159513
TRUE	-0.072717
TRUE	-0.110449
TRUE	-0.333166
TRUE	-0.0934786
TRUE	-0.12373
TRUE	-0.12249
TRUE	-0.0531851
TRUE	-0.322438
TRUE	-0.118294
TRUE	-0.0763247
TRUE	-0.130146
TRUE	-0.058213
TRUE	-0.15349
TRUE	-0.048604
TRUE	-0.109737
TRUE	-0.232353
TRUE	-0.19833
TRUE	-0.139416
TRUE	-0.0400784
TRUE	-0.271912
TRUE	-9.33653e-06
TRUE	-0.0831286
TRUE	-0.104569
TRUE	0.0452098
TRUE	-0.111277
TRUE	-0.0669702
TRUE	-0.193024
TRUE	-0.237037
TRUE	-0.17872
TRUE	-0.161665
TRUE	-0.293451
TRUE	-0.105725
TRUE	-0.187436
TRUE	-0.310366
TRUE	-0.101787
TRUE	-0.0548338
TRUE	-0.127391
TRUE	-0.205366
TRUE	-0.0623721
TRUE	-0.166716
TRUE	-0.17345
TRUE	-0.0346642
TRUE	-0.193158
TRUE	0.0998397
TRUE	0.030527
TRUE	0.119325
TRUE	-0.0124368
TRUE	-0.173748
TRUE	-0.26032
TRUE	0.0499616
TRUE	-0.131612
TRUE	-0.123757
TRUE	-0.285839
TRUE	-0.24739
TRUE	-0.184122
TRUE	-0.162838
TRUE	-0.133312
TRUE	-0.305026
TRUE	-0.00442295
TRUE	-0.0693374
TRUE	0.0511894
TRUE	-0.491463
TRUE	0.0632624
TRUE	-0.144366
TRUE	-0.205507
TRUE	-0.204993
TRUE	-0.106099
TRUE	0.227142
TRUE	-0.156168
TRUE	-0.154053
TRUE	0.80475
TRUE	0.00534946
TRUE	-0.130791
TRUE	-0.0110767
TRUE	-0.120109
TRUE	-0.191728
TRUE	-0.212421
TRUE	-0.063189
TRUE	-0.163794
TRUE	-0.0922086
TRUE	-0.139972
TRUE	-0.119667
TRUE	0.0768667
TRUE	-0.10263
TRUE	0.00889636
TRUE	-0.0984951
TRUE	0.0237104
TRUE	0.0693468
TRUE	-0.269795
TRUE	0.0101244
TRUE	-0.0349668
TRUE	0.184986
TRUE	0.0986186
TRUE	-0.139116
TRUE	-0.153149
TRUE	-0.0587609
TRUE	-0.186818
TRUE	-0.157574
TRUE	-0.187492
TRUE	0.00134399
TRUE	-0.179096
TRUE	-0.276821
TRUE	-0.141272
TRUE	-0.150447
TRUE	-0.186738
TRUE	0.160349
TRUE	-0.123205
TRUE	-0.219089
TRUE	-0.153146
TRUE	0.136998
TRUE	-0.139465
TRUE	-0.100734
[truncated: 7,073 more rows]

## Sheet: Fig5S2B
percent_charged	pred_err
100	-0.346728
100	-0.133999
100	1.35452
100	0.804586
100	-0.588955
100	-0.310677
100	0.710519
100	0.38766
100	2.14364
100	0.0550514
100	1.29266
100	0.127302
100	0.838604
100	0.248589
100	0.797159
100	0.63756
100	0.0511428
100	0.383031
100	0.63604
100	0.0744182
100	0.0810144
100	-0.135305
100	0.265
100	0.497467
100	1.55657
100	-0.327229
100	0.351042
100	0.291894
100	0.195672
100	0.0777809
100	0.580545
100	0.190931
100	-0.228231
100	-0.0172839
100	0.0660554
100	0.209502
100	0.0818845
100	0.054926
100	0.390946
100	0.37875
100	0.361714
100	0.311219
100	0.0728261
100	0.0490908
100	0.633323
100	0.402988
100	-0.0615477
100	0.384233
100	0.860904
100	0.426043
100	0.520913
100	0.317218
100	0.392057
100	0.810311
100	0.244449
100	-0.0455276
100	0.71891
100	0.631873
100	0.377934
100	0.22134
100	0.673913
100	0.678475
100	0.678831
100	0.375612
100	0.180667
100	0.663214
100	-0.0942687
100	0.433583
100	0.581795
100	0.042978
100	-0.118441
100	0.909412
100	0.664304
100	0.203285
100	0.327421
100	0.279309
100	0.37016
100	0.19251
100	0.157459
100	0.0910533
100	0.437103
100	-0.0919043
100	0.233384
100	0.28258
100	-0.0207764
100	0.141759
100	1.28318
100	0.348931
100	0.648722
100	0.207091
100	-0.142092
100	0.160399
100	-0.0622525
100	0.622771
100	0.408384
100	0.543825
100	-0.778488
100	-0.458414
100	0.192836
100	0.58055
100	0.110797
100	0.380046
100	0.175163
100	0.779204
100	0.448462
100	0.336137
100	0.677302
100	0.776402
100	0.347938
100	0.843874
100	0.498604
100	0.416503
100	0.016966
100	-0.148248
100	0.516894
100	0.0690145
100	0.752121
100	0.630167
100	-0.326946
100	0.25622
100	0.947793
100	1.14203
100	0.690152
100	-0.340096
100	1.05185
100	1.78226
100	1.59824
100	1.66746
100	-0.777072
100	1.55218
100	1.60258
100	0.256378
100	0.569835
100	-0.364573
100	-0.0925904
100	-0.301517
100	0.193862
100	0.896115
100	0.50025
100	1.20293
100	0.297101
100	1.12357
100	-0.137294
100	0.293865
100	1.3677
100	0.493418
100	0.511828
100	-0.637463
100	0.339252
100	0.247322
100	0.189929
100	0.347076
100	-0.097447
100	0.370316
100	0.319295
100	0.216174
100	0.503752
100	-0.0284886
100	0.297725
100	0.273088
100	0.246724
100	0.29295
100	-0.566198
100	0.625615
100	-0.0306072
100	-0.0465523
100	1.13586
100	0.227025
100	-0.126145
100	0.304484
100	0.0960326
100	0.0419562
100	0.498717
100	-0.0260599
100	-0.180702
100	-0.363444
100	0.383185
100	-0.0853013
100	0.593819
100	-0.0207144
100	-0.250317
100	0.397394
100	-0.00948531
100	0.535263
100	0.4999
100	0.356718
100	0.693349
100	1.0284
100	0.309961
100	0.201576
100	0.266345
100	0.177575
100	-0.18478
100	0.0582251
100	0.128465
100	0.245523
100	0.0992302
100	0.108107
100	0.0234828
100	-0.186918
100	0.370294
100	-0.00357544
100	0.195165
100	0.191817
100	0.564302
100	0.286028
100	0.249213
100	-0.226313
100	-0.0539707
100	-0.178038
100	0.561655
100	0.294799
100	0.344873
100	-0.252504
100	-0.00983339
100	0.132293
100	0.145018
100	-0.0888177
100	-0.291568
100	0.236306
100	0.0269765
100	0.344939
100	0.442208
100	1.27034
100	0.468272
100	0.317941
100	0.662028
100	-0.114998
100	-0.0192202
100	0.487452
100	0.40983
100	0.258226
100	0.234257
100	0.854895
100	-0.150871
100	0.372346
100	0.0777109
100	0.221079
100	0.470821
100	-0.151341
100	0.119765
100	-0.0324676
100	0.423002
100	0.459414
100	-0.0335939
100	0.21211
100	0.312978
100	-0.0898435
100	-0.75468
100	0.440339
100	0.480782
100	0.588561
100	0.855893
100	0.250462
100	0.191505
100	0.362272
100	0.512204
100	-0.00893084
100	-0.147637
100	0.285082
100	-0.0143125
100	0.183786
100	0.0483212
100	0.00275248
100	-0.161585
100	-0.166997
100	-0.0645795
100	0.0784486
100	-0.0797295
100	0.152633
100	0.127716
100	0.0160462
100	-0.230846
100	0.0880204
100	0.548198
100	0.328748
100	0.0484075
100	0.325416
100	-0.472545
100	0.760999
100	0.836116
100	-0.0418452
100	-0.300253
100	0.0504216
100	0.612756
100	0.390834
100	0.241072
100	-1.20788
100	-0.282252
100	-0.0259428
100	-0.11534
100	-0.0265859
100	-0.377081
100	0.072121
100	0.795746
100	0.595598
100	0.773593
100	1.26115
100	0.5503
100	-0.374262
100	-0.194569
100	1.45246
100	0.511779
100	0.020788
100	1.25355
100	0.381251
100	0.50649
100	0.584633
100	0.940375
100	0.59798
100	-0.0275172
100	0.360429
100	-0.0391684
100	0.0249467
100	0.234726
100	-0.0747613
100	0.277363
100	0.0631657
100	-0.125151
100	0.407162
100	-0.699626
100	0.197833
100	-0.0178232
100	0.0779678
100	-0.0274355
100	-0.291223
100	-1.38645
100	-0.404838
100	-0.273893
100	0.585259
100	-0.61204
100	-0.6705
100	-0.99386
100	-0.0526894
100	-1.51308
100	-0.39335
100	-0.596157
100	0.717986
100	-1.18858
100	-0.098459
100	-1.90489
100	-0.723347
100	0.233754
100	-0.619669
100	-0.209888
100	-0.276923
100	-0.715438
100	-1.06375
100	-1.48247
100	-0.194589
100	-0.342184
100	-0.307956
100	-0.26861
100	-0.163133
100	0.00669345
100	-0.0965103
100	-0.164479
100	-0.222691
100	-0.119922
100	-0.118831
100	-0.337611
100	-0.0640256
100	-0.426473
100	-0.172041
100	-0.787241
100	-0.297863
100	0.300257
100	-0.190231
100	-0.413868
100	-0.121823
100	-0.0156951
100	-0.139278
100	-1.03678
100	-0.421911
100	-0.53421
100	-0.139712
100	0.284557
100	-0.64194
100	-0.312577
100	-0.21491
100	0.425282
100	-0.949874
100	-0.263402
100	-0.812797
100	-1.31876
100	-1.20212
100	-1.12077
100	-0.960589
100	-0.918443
100	-0.721218
100	-0.0153486
100	-0.601888
100	-0.500153
100	-0.186947
100	0.1992
100	-1.19252
100	-0.3299
100	-0.288169
100	-0.149763
100	-0.437289
100	-0.707193
100	-0.0279234
100	-0.244605
100	-0.056491
100	-0.915013
100	-0.460524
100	0.158692
100	-0.387381
100	0.101697
100	-0.0756935
100	-0.891506
100	-0.526789
100	-0.547714
100	-0.300967
100	-0.351838
100	-0.010808
100	0.557426
100	-0.594
100	-0.748377
100	-0.169404
100	0.0583431
100	0.499786
100	-0.26243
100	-0.106299
100	-0.34333
100	-0.334256
100	-0.230063
100	-0.0202294
100	-0.316289
100	-0.205045
100	0.005843
100	-0.933517
100	-0.4835
100	-0.531947
100	-0.289687
100	-0.328516
100	-1.18496
100	0.10456
100	0.0503114
100	-0.171518
100	0.357044
100	-1.24036
100	-0.399417
100	-0.0197106
100	-0.345578
100	-0.667728
100	-0.715713
100	0.0712248
100	-0.660746
100	-1.55268
100	0.161306
100	-1.37241
100	0.514002
100	-0.161346
100	-0.328779
100	0.756289
100	-0.777309
100	-0.618153
100	-2.17015
100	-1.50242
100	-1.70491
100	-1.33572
100	-2.03731
100	-3.53368
100	-1.06497
100	-2.04877
100	-1.07646
100	-1.35844
100	-1.59379
100	-1.5372
100	-2.3534
100	-0.0760429
100	-0.148296
100	-0.112675
100	-0.437311
100	-0.234384
100	-0.247463
100	-0.327728
100	-0.460782
100	-0.287716
100	-0.172225
100	-0.282504
100	-0.457032
100	-0.225346
100	0.0317967
100	-0.201062
100	0.940362
100	-0.200393
100	0.0625337
100	-0.353195
100	-0.273015
100	-0.501608
100	0.0276653
100	-0.0216449
100	-1.24581
100	-0.0443182
100	-0.278293
100	0.292108
100	-0.061745
100	-0.603131
100	0.00823875
100	-0.453799
100	1.25993
100	0.36103
100	-0.619477
100	0.147857
100	0.138359
100	-0.123035
100	-0.0494624
100	0.209565
100	-0.767446
100	-0.506581
100	-0.318819
100	-0.185514
100	-0.193406
100	-0.0922228
100	-0.402458
100	-0.152646
100	0.264245
100	-0.00554839
100	-0.0453636
100	-0.198779
100	0.232243
100	0.196017
100	-0.334768
100	-0.203133
100	0.230363
100	-0.205173
100	-0.937385
100	-0.144888
100	-0.468669
100	-0.0548512
100	0.131213
100	-0.066917
100	-0.385776
100	-0.298932
100	-0.331576
100	0.0749983
100	-0.66678
100	-0.300664
100	-0.0768907
100	0.349255
100	-0.852624
100	0.0816951
100	-0.141508
100	0.246517
100	0.202641
100	-0.746693
100	-0.0263365
100	0.267036
100	0.0757482
100	0.173002
100	0.128838
100	-0.319147
100	-0.491471
100	-0.114256
100	-0.315016
100	-0.571791
100	-0.183533
100	-0.287461
100	-0.255369
100	-0.0630984
100	-0.133788
100	-0.0132454
100	-0.0326191
100	-0.00209461
100	0.0549083
100	0.0930147
100	-0.358483
100	-0.107308
100	-0.393899
100	0.0237781
100	0.36301
100	-0.262481
100	-0.58179
100	-0.494685
100	-0.361962
100	-0.400054
100	-0.686679
100	-0.391043
100	-0.172211
100	-0.365491
100	0.867782
100	-0.326454
100	0.0839066
100	-0.658037
100	0.184212
100	-0.0485432
100	0.216485
100	-0.591978
100	-0.067593
100	-0.20954
100	-0.603415
100	0.00448234
100	0.00784605
100	-0.327973
100	0.0219291
100	-0.176008
100	0.619793
100	-0.28506
100	-0.615612
100	-0.222913
100	-0.63662
100	-0.150807
100	-0.109753
100	-0.194664
100	-0.301962
100	-0.524728
100	-0.587195
100	-0.121962
100	-0.632177
100	0.978301
100	-1.47729
100	-0.269105
100	0.37841
100	-1.36425
100	-0.89672
100	-1.08479
100	-0.588272
100	0.387127
100	1.48915
100	0.542788
100	0.960746
100	0.81387
100	1.73163
100	0.8783
100	0.256087
100	0.904413
100	-0.0397993
100	0.683327
100	-0.280398
100	0.459154
100	0.901198
100	0.115526
100	-0.163439
100	-0.495075
100	0.286551
100	-0.137639
100	0.110184
100	0.0321727
100	-0.135876
100	0.00837636
100	-0.206376
100	-0.0961698
100	0.858933
100	-0.245575
100	-0.260697
100	-0.169856
0	-0.125986
0	0.200327
0	0.191659
0	0.274804
0	0.661692
0	-0.00763243
0	0.0627595
0	-0.527652
0	0.146864
0	-0.216656
0	0.288531
0	-0.0129116
0	0.251741
0	0.0221944
0	-0.0206617
0	0.186243
0	-0.0406592
0	-0.0780405
0	0.195659
0	-0.0539444
0	0.150179
0	-0.0271159
0	0.000738129
0	-0.127478
0	-0.013721
0	0.0154683
0	0.0458725
0	7.63105e-06
0	-0.0361755
0	-0.0516599
0	-0.136152
0	0.214542
0	-0.0660028
0	-0.0947122
0	0.0532757
0	0.0382602
0	0.662913
0	0.0836091
0	0.123379
0	0.0340143
0	-0.00476363
0	-0.0323952
0	-0.0215557
0	0.222948
0	0.0209024
0	0.00891126
0	-0.019641
0	0.0588045
0	-0.251664
0	-0.0425447
0	-0.0852847
0	-0.0653405
0	0.24486
0	0.0238615
0	0.0803113
0	0.0104514
0	0.115124
0	0.51168
0	0.0302421
0	0.0962732
0	0.0289193
0	-0.0542228
0	0.484802
0	0.127528
0	0.128392
0	0.208504
0	0.338616
0	0.273638
0	0.536645
0	0.0214327
0	0.137798
0	0.0877877
0	0.163164
0	-0.00254313
0	-0.132019
0	-0.148326
0	-0.0999199
0	0.163752
0	0.018593
0	0.161282
0	-0.0528015
0	-0.174157
0	0.0386167
0	0.208775
0	-0.143018
0	-0.075742
0	0.108967
0	0.190876
0	0.263809
0	0.0518279
0	0.144087
0	0.152612
0	0.168644
0	-0.0485142
0	0.100676
0	-0.112219
0	0.14403
0	-0.234175
0	0.0244913
0	0.076735
0	-0.166163
0	0.118984
0	0.0267366
0	0.0168112
0	-0.0253478
0	0.0919932
0	0.00950721
0	0.0755945
0	0.0320373
0	-0.0394234
0	0.154885
0	0.251103
0	0.057315
0	0.232796
0	0.162274
0	0.103993
0	0.0607041
0	0.172258
0	0.13337
0	0.18103
0	0.0191927
0	0.0125879
0	0.159368
0	0.0674985
0	0.0272714
0	-0.184867
0	-0.190776
0	-0.0154254
0	-0.0602532
0	0.0976228
0	-0.0874288
0	0.160371
0	-0.134282
0	0.315878
0	0.393159
0	0.0642565
0	-0.0375813
0	0.65876
0	-0.286077
0	-0.113107
0	0.0392186
0	0.0102316
0	0.390577
0	0.248393
0	0.305162
0	0.266344
0	0.274063
0	0.0660236
0	0.354336
0	-0.10739
0	0.242621
0	0.020597
0	-0.115176
0	0.00822609
0	0.108506
0	0.0283437
0	0.0731918
0	-0.0489
0	0.0385634
0	-0.0170583
0	0.314114
0	0.11873
0	0.547819
0	0.064088
0	-0.00326015
0	0.235341
0	0.416159
0	0.296297
0	0.270027
0	0.185755
0	0.590517
0	0.316242
0	0.245205
0	0.325288
0	0.36628
0	0.562466
0	0.321584
0	0.207414
0	0.731198
0	0.799346
0	0.497208
0	0.477537
0	0.258369
0	0.268507
0	0.523164
0	0.675222
0	0.150328
0	0.206184
0	0.463292
0	0.222268
0	0.613959
0	0.159527
0	0.561957
0	0.422874
0	0.674793
0	0.268799
0	0.226974
0	0.296089
0	0.506698
0	0.206073
0	0.285837
0	0.230668
0	0.649932
0	0.425389
0	0.481355
0	0.42323
0	0.637204
0	0.58172
0	0.174641
0	0.186763
0	0.634999
0	0.491943
0	0.662781
0	0.474387
0	0.340218
0	0.532622
0	0.151014
0	0.161438
0	0.0243188
0	0.559181
0	0.307278
0	0.132621
0	0.293534
0	0.094191
0	-0.230252
0	0.23549
0	0.434212
0	0.320998
0	0.240809
0	0.305779
0	-0.114895
0	0.403728
0	0.544062
0	0.37451
0	0.243596
0	0.192293
0	0.464374
0	0.695691
0	0.382418
0	0.187135
0	0.170242
0	0.0869602
0	0.200576
0	0.406806
0	0.339615
0	-0.0221531
0	0.232348
0	0.0190801
0	0.153674
0	0.68473
0	0.298129
0	0.283039
0	0.121201
0	0.0839423
0	0.108967
0	0.517182
0	0.202154
0	0.33041
0	0.162188
0	0.220234
0	0.510091
0	0.349732
0	0.200669
0	0.200442
0	0.261188
0	0.0188604
0	0.442833
0	-0.0853375
0	0.454036
0	0.240132
0	0.0146936
0	0.536892
0	0.42179
0	-0.252406
0	-0.666273
0	0.0807386
0	0.0972918
0	0.0766704
0	0.247434
0	-0.0711586
0	0.104184
0	0.0537943
0	0.51765
0	0.379077
0	0.108925
0	0.0568919
0	0.619319
0	0.708516
0	0.357595
0	0.164243
0	0.12442
0	0.444908
0	-0.0522539
0	-0.0736742
0	0.421192
0	0.13664
0	0.251458
0	0.489142
0	0.743278
0	0.398277
0	-0.237479
0	0.102075
0	0.0552106
0	-0.00985363
0	0.3035
0	0.289002
0	0.20556
0	0.373069
0	0.194774
0	0.209403
0	0.067674
0	0.486966
0	-0.000357852
0	0.436649
0	0.0711735
0	0.305081
0	0.273305
0	0.149152
0	0.352521
0	0.237932
0	0.104696
0	-0.111078
0	-0.0118836
0	0.203944
0	-0.125234
0	-0.107692
0	0.304358
0	0.254952
0	-0.147983
0	0.020197
0	0.151794
0	0.130112
0	-0.048086
0	0.733665
0	0.151696
0	0.119222
0	0.0522062
0	0.778602
0	0.220428
0	-0.111046
0	-0.393781
0	0.261811
0	-0.149461
0	0.0363804
0	0.0123759
0	0.292134
0	0.296452
0	0.129682
0	0.0775748
0	-0.264266
0	-0.0648055
0	0.0998906
0	-0.0349734
0	0.0607409
0	0.0670191
0	-0.0460172
0	0.187033
0	0.0121448
0	-0.0178685
0	-0.0947464
0	-0.0394361
0	0.15026
0	0.219391
0	0.0706945
0	-0.0598455
0	-0.0187295
0	-0.113498
0	0.248912
0	0.189602
0	-0.0461778
0	0.241416
0	-0.0466392
0	-0.0321064
0	0.00373565
0	-0.142189
0	-0.0780595
0	-0.054242
0	-0.0825192
0	0.125314
0	0.00775604
0	0.140389
0	-0.178671
0	-0.0027948
0	0.310532
0	0.514182
0	0.193473
0	0.245144
0	0.108172
0	-0.15181
0	-0.0965554
0	0.102852
0	0.0855762
0	0.385633
0	0.0137455
0	-0.0714547
0	0.0584851
0	-0.0105844
0	0.0185029
0	0.0286549
0	-0.161153
0	0.181919
0	0.125028
0	0.106563
0	0.225913
0	-0.00145093
0	0.115609
0	0.143121
0	-0.103826
0	0.161757
0	0.016237
0	-0.19135
0	-0.0469199
0	-0.0302819
0	0.103112
0	0.0957945
0	0.119279
0	-0.0420263
0	0.0120004
0	0.0767601
0	-0.0172373
0	-0.310402
0	0.0790477
0	0.0152909
0	0.016623
0	0.120703
0	-0.0554239
0	0.0209187
0	0.157421
0	0.0322067
0	0.0301554
0	0.0828908
0	-0.0717231
0	-0.0232346
0	0.0528386
0	0.044054
0	0.185019
0	0.163193
0	-0.0534144
0	-0.0375891
0	0.157775
0	-0.0790074
0	-0.105856
0	0.0378647
0	-0.0180931
0	-0.267741
0	-0.103114
0	0.0604491
0	0.0212768
0	-0.0539574
0	-0.119375
0	-0.0604028
0	-0.0547875
0	0.0834139
0	-0.124781
0	-0.0244548
0	-0.00125624
0	0.0105165
0	0.0934169
0	0.0547773
0	0.1886
0	0.001172
0	-0.206519
0	0.323207
0	0.361437
0	0.0299013
0	0.314653
0	0.104168
0	-0.0713889
0	0.0072841
0	0.0450069
0	0.036181
0	0.0890699
0	0.355688
0	0.212644
0	0.281542
0	-0.00812179
0	0.186428
0	0.13704
0	-0.0337776
0	0.0844736
0	0.114588
0	0.0122041
0	-0.35399
0	0.257954
0	0.270302
0	0.0627969
0	-0.00686101
0	0.311583
0	0.267873
0	-0.0187926
0	0.130203
0	-0.0991974
0	0.244917
0	0.0961999
0	-0.0476563
0	0.0162964
0	0.221645
0	0.340238
0	0.143238
0	-0.472855
0	0.0786334
0	-0.0103759
0	-0.112789
0	-0.16541
0	-0.0417513
0	0.169055
0	-0.0579032
0	-0.00434242
0	0.0294645
0	0.0685136
0	0.512086
0	0.0861621
0	0.200288
0	0.0442991
0	0.151702
0	-0.123308
0	-0.0193038
0	0.177135
0	-0.145378
0	0.0791422
0	-0.0906457
0	0.14067
0	-0.106272
0	0.0566063
0	-0.0452189
0	0.145496
0	0.0092814
0	0.0516997
0	0.0629452
0	-0.0436367
0	-0.149821
0	0.205443
0	0.0298574
0	0.144061
0	0.317363
0	0.0924615
0	0.051259
0	0.119082
0	-0.212655
0	0.232836
0	0.0739168
0	-0.0128127
0	-0.0590069
0	0.0354683
0	0.198658
0	0.15189
0	0.334482
0	0.134501
0	0.158185
0	0.0445286
0	0.258338
0	0.0137644
0	-0.127366
0	-0.100953
0	0.0292936
0	0.0817158
0	0.0975433
0	0.00860571
0	0.0378096
0	0.183316
0	0.0646282
0	0.261889
0	0.153461
0	-0.114517
0	0.206029
0	-0.0330632
0	0.0851913
0	-0.00280143
0	-0.072028
0	0.115008
0	0.150768
0	0.38731
0	0.0429988
0	-0.0171063
0	0.0108097
0	0.18353
0	0.132386
0	0.106192
0	0.308954
0	0.126889
0	0.0193503
0	-0.0469808
0	0.122841
0	0.160586
0	0.0563778
0	-0.0792599
0	0.0830934
0	0.215023
0	0.135537
0	0.220019
0	0.102299
0	0.274568
0	0.0223672
0	0.0288579
0	0.0951882
0	0.0630614
0	-0.0857526
0	0.0443588
0	-0.0110235
0	0.0761599
0	0.0589358
0	-0.0137017
0	0.214158
0	0.0699923
0	0.11079
0	0.00726631
0	0.0893483
0	-0.055852
0	0.120367
0	-0.0568855
0	0.404321
0	0.0708576
0	0.176506
0	0.022975
0	0.0653333
0	0.16608
0	-0.0348819
0	0.345717
0	0.307763
0	0.154606
0	0.0812485
0	0.544603
0	0.0940207
0	0.00384687
0	0.743222
0	0.061305
0	0.204648
0	0.0836576
0	0.226124
0	-0.045035
0	-0.0446506
0	0.126401
0	0.280966
0	0.221971
0	-0.287429
0	-0.0362875
0	-0.31884
0	0.0756812
0	0.0548483
0	0.336926
0	0.390361
0	0.0386441
0	0.07897
0	0.181557
0	-0.184541
0	0.276224
0	-0.0299746
0	0.0477931
0	-0.208227
0	-0.21405
0	-0.0563884
0	0.124413
0	-0.0334872
0	0.0224281
0	0.233107
0	-0.0275422
0	0.0423122
0	-0.477754
0	0.0952135
0	0.345134
0	-0.0287413
0	-0.231723
0	0.447557
0	0.201343
0	0.290905
0	-0.0230496
0	0.112846
0	0.146947
0	-0.0129963
0	0.110087
0	0.0840217
0	-0.134966
0	0.469307
0	0.114336
0	0.0609536
0	0.048626
0	-0.0506477
0	0.366567
0	0.106933
0	0.00126785
0	0.0161991
0	0.170673
0	0.173365
0	0.0534212
0	-0.28928
0	0.0298299
0	0.0224263
0	0.0766605
0	0.00712604
0	0.0878816
0	0.0511708
0	0.020326
0	-0.0409126
0	-0.0738611
0	0.146932
0	0.0518894
0	-0.194285
0	0.0226259
0	0.153888
0	0.0572282
0	-0.118998
0	0.0205075
0	0.0853824
0	0.00183705
0	-0.0901059
0	-0.33604
0	0.0729628
0	-0.26229
0	-0.0559212
0	0.136957
0	-0.0288418
0	-0.0499761
0	0.118778
0	0.735513
0	0.0343332
0	0.201089
0	-0.106077
0	0.114978
0	-0.0755317
0	-0.0609675
0	-0.0818649
0	0.00705143
0	-0.0363465
0	0.204658
0	-0.127988
0	0.228335
0	0.000755964
0	0.073041
0	0.0331959
0	0.0444052
0	-0.022204
0	0.0942106
0	0.125669
0	0.190819
0	0.939297
0	0.0476089
0	0.198807
0	0.0653085
0	-0.106371
0	0.0629029
0	0.0712368
0	0.0113804
0	0.0190915
0	0.104095
0	0.405359
0	0.401894
0	0.156572
0	0.0930829
0	0.0829373
0	0.00336675
0	0.239744
0	0.0981892
0	0.0440075
0	0.285177
0	0.237217
0	0.293603
0	0.132967
0	-0.016359
0	-0.0187633
0	-0.0567361
0	0.0304086
0	0.126732
0	0.141524
0	-0.0381484
0	0.0435012
0	0.0850248
0	-0.0177325
0	0.101307
0	-0.00149181
0	0.35997
0	-0.0407228
0	-0.118969
0	0.156437
0	-0.116413
0	0.0679565
0	-0.0305068
0	0.14071
0	-0.0399864
0	0.312538
0	-0.281168
0	0.405728
0	0.0024886
0	0.0243913
0	-0.239197
0	0.267636
0	-0.475833
0	-0.090554
0	-0.223945
0	0.139982
0	-0.0982076
0	0.313869
0	-0.00656595
0	-0.0366486
0	-0.0255206
0	-0.0969485
0	-0.00639184
0	0.151183
0	-0.00503038
0	0.0699687
0	0.0236928
0	-0.0450857
0	0.0522516
0	0.47431
0	0.0665148
0	0.0326239
0	0.45025
0	0.279512
0	0.263048
0	0.168675
0	0.0565852
0	0.0924714
0	0.133819
0	0.265319
0	0.0356832
0	-0.0313073
0	-0.365249
0	-0.0724819
0	0.40883
0	-0.0500567
0	0.363175
0	0.000317912
0	-0.0627234
0	-0.109902
0	0.426554
0	0.0123809
0	-0.0833186
0	-0.307675
0	0.0537337
0	-0.036646
0	-0.0433505
0	-0.161548
0	0.00304941
0	-0.200885
0	-0.0723035
0	-0.0509597
0	-0.0903677
0	-0.0621805
0	-0.0891477
0	-0.100898
0	0.0404189
0	-0.184714
0	-0.126534
0	-0.212538
0	-0.0323791
0	-0.145274
0	-0.136983
0	0.187406
0	0.025088
0	-0.12529
0	-0.00370428
0	0.0227034
0	0.0546044
0	0.163069
0	0.0793651
0	-0.0203588
0	0.0987641
0	-0.0168861
0	-0.0862466
0	-0.0634618
0	-0.0363306
0	0.016363
0	0.232488
0	0.211475
0	-0.152245
0	0.0199332
0	-0.0502178
0	0.20043
0	0.310771
0	0.0629198
0	-0.0820291
0	-0.374824
0	0.50519
0	-0.171227
0	-0.0368434
0	-0.136004
0	-0.21624
0	0.134902
0	-0.105059
0	-0.406112
0	0.0541385
0	-0.0222652
0	0.00329603
0	0.0171978
0	0.083249
0	-0.0649003
0	-0.0979837
0	-0.000218847
0	0.013553
0	-0.104278
0	0.168402
0	0.0330392
0	0.150048
0	0.312572
0	0.00358937
0	-0.0689546
0	-0.024436
0	0.459144
0	-0.110457
0	-0.114331
0	-0.154102
0	0.111435
0	0.148713
0	-0.0585589
0	0.00803487
0	-0.0538756
0	-0.00438688
0	0.00252439
0	0.0600513
0	-0.194255
0	0.0282487
0	-0.0027621
0	0.0271242
0	0.241756
0	0.155722
0	0.0417664
0	-0.000996733
0	-0.0845712
0	0.00139179
0	0.00906453
0	-0.176623
0	-0.0371038
0	-0.206148
0	0.713739
0	-0.0558882
0	-0.0256831
0	0.1245
0	-0.194412
0	-0.212381
0	-0.0949934
0	-0.0809758
0	-0.0544766
0	-0.238603
0	0.0198743
0	0.000768476
0	-0.234878
0	0.198344
0	-0.0334799
0	-0.0509163
0	-0.195195
0	0.0862132
0	-0.111475
0	-0.0194868
0	-0.198762
0	0.0131127
0	-0.12154
0	0.199339
0	0.0420411
0	0.322132
0	0.166383
0	0.0559105
0	-0.148843
0	-0.198482
0	-0.203328
0	0.0145706
0	-0.0243991
0	-0.0705436
0	-0.16264
0	-0.30327
0	-0.297475
0	-0.130118
0	0.141349
0	-0.0128956
0	-0.0546317
0	0.0518136
0	-0.059511
0	-0.0588124
0	-0.0495557
0	0.00189338
0	0.107939
0	0.176581
0	-0.200682
0	-0.0248493
0	0.13795
0	-0.0726887
0	-0.116314
0	-0.315933
0	0.119867
0	0.452655
0	-0.0677798
0	-0.218217
0	-0.0538669
0	-0.13395
0	0.142917
0	-0.229549
0	-0.134599
0	-0.579644
0	0.181949
0	0.0973797
0	-0.150632
0	0.0759287
0	0.119584
0	0.0945383
0	-0.0151668
0	0.0392844
0	0.0660294
0	0.169005
0	0.135292
0	-0.143711
0	0.0204862
0	0.181823
0	-0.019255
0	0.0299337
0	0.37878
0	-0.0679643
0	-0.0562221
0	0.0673502
0	-0.0308062
0	0.0857634
0	0.257056
0	0.0745234
0	0.00778984
0	-0.078434
0	0.0277114
0	-0.000249854
0	-0.053064
0	-0.131389
0	0.00391267
0	0.101559
0	0.122879
0	0.151214
0	-0.17152
0	-0.0135311
0	-0.0243538
0	-0.100745
0	-0.06385
0	0.0306234
0	0.0362688
0	-0.0205948
0	0.146568
0	0.00544045
0	-0.00641626
0	0.15351
0	-0.00377877
0	-0.151959
0	0.187427
0	0.12129
0	0.0798339
0	0.179134
0	0.0617345
0	-0.0835694
0	-0.0256406
0	-0.0599494
0	-0.0310684
0	-0.0591994
0	-0.0746591
0	0.00365735
0	0.0688783
0	0.140095
0	0.11992
0	-0.0547139
0	0.118168
0	0.0122625
0	0.0817213
0	-0.165636
0	-0.165999
0	0.0913713
0	-0.0391677
0	-0.236744
0	-0.13861
0	-0.13094
0	-0.148329
0	0.112173
0	-0.0581868
0	-0.0237155
0	0.0373522
0	0.0602329
0	0.0956
0	0.233973
0	0.0367858
0	0.000444534
0	0.167451
0	-0.0328962
0	0.144219
0	0.0490813
0	-0.0894816
0	-0.274018
0	-0.0377813
0	0.115766
0	0.0267057
0	0.185444
0	0.0224655
0	0.128399
0	0.0863185
0	0.23789
0	-0.818515
0	0.0648823
0	0.0050701
0	-0.00290135
0	-0.06532
0	0.127622
0	0.0507047
0	0.0560041
0	0.214836
0	0.0613062
0	0.097605
0	0.155346
0	-0.180714
0	-0.210075
0	0.213452
0	0.178403
0	0.0390148
0	-0.135312
0	0.116352
0	0.0521934
0	0.187437
0	0.00194092
0	0.0837101
0	0.0814881
0	-0.323466
0	0.145435
0	0.137753
0	0.627748
0	0.261708
0	0.309381
0	0.0792534
0	0.0826243
0	0.0236867
0	0.0563193
0	0.134034
0	0.432896
0	0.220303
0	0.0481293
0	-0.091397
0	-0.00972403
0	0.189757
0	-0.109588
0	0.0151214
0	0.136364
0	0.0852915
0	0.0976995
0	0.0501173
0	-0.11288
0	-0.0726001
0	0.0525832
0	-0.302049
0	0.060866
0	-0.190443
0	-0.161446
0	0.0839696
0	-0.0197463
0	-0.266799
0	-0.158928
0	-0.12754
0	-0.0780395
0	-0.448657
0	-0.222878
0	-0.0922642
0	-0.302249
0	-0.223836
0	-0.108637
0	0.0682794
0	-0.388339
0	-0.157256
0	-0.181751
0	-0.164817
0	-0.101816
0	-0.156059
0	-0.1816
0	-0.239365
0	0.0710477
0	-0.17474
0	-0.182093
0	-0.13712
0	-0.167434
0	-0.377646
0	-0.0549793
0	-0.192053
0	-0.0459888
0	-0.0834797
0	-0.08997
0	-0.419523
0	-0.112449
0	-0.113494
0	-0.117655
0	-0.249471
0	0.0519017
0	-0.0762958
0	-0.0388357
0	-0.10422
0	-0.216094
0	-0.101115
0	0.048172
0	-0.252099
0	-0.145538
0	-0.17025
0	-0.175234
0	-0.187652
0	-0.202151
0	-0.125139
0	-0.0863888
0	-0.187244
0	-0.183673
0	-0.22409
0	-0.00714385
0	-0.14275
0	-0.485653
0	0.224597
0	-0.0831538
0	-0.134252
0	-0.322119
0	-0.157049
0	-0.258806
0	-0.0476701
0	-0.163992
0	-0.144156
0	-0.141954
0	-0.128527
0	-0.171079
0	-0.0365989
0	-0.269212
0	-0.149488
0	-0.181495
0	-0.162856
0	-0.225195
0	-0.0980952
0	0.0170662
0	-0.114354
0	-0.172715
0	0.0336449
0	-0.407666
0	-0.210056
0	-0.181559
0	-0.15653
0	-0.14351
0	-0.0640891
0	-0.126582
0	-0.138787
0	-0.185045
0	-0.00754348
0	-0.10145
0	-0.0787839
0	-0.316273
0	-0.164848
0	-0.160544
0	-0.119927
0	-0.146118
0	-0.123102
0	0.0299282
0	-0.159513
0	-0.072717
0	-0.110449
0	-0.333166
0	-0.0934786
0	-0.12373
0	-0.12249
0	-0.0531851
0	-0.322438
0	-0.118294
0	-0.0763247
0	-0.130146
0	-0.058213
0	-0.15349
0	-0.048604
0	-0.109737
0	-0.232353
0	-0.19833
0	-0.139416
0	-0.0400784
0	-0.271912
0	-9.33653e-06
0	-0.0831286
0	-0.104569
0	0.0452098
0	-0.111277
0	-0.0669702
0	-0.193024
0	-0.237037
0	-0.17872
0	-0.161665
0	-0.293451
0	-0.105725
0	-0.187436
0	-0.310366
0	-0.101787
0	-0.0548338
0	-0.127391
0	-0.205366
0	-0.0623721
0	-0.166716
0	-0.17345
0	-0.0346642
0	-0.193158
0	0.0998397
0	0.030527
0	0.119325
0	-0.0124368
0	-0.173748
0	-0.26032
0	0.0499616
0	-0.131612
0	-0.123757
0	-0.285839
0	-0.24739
0	-0.184122
0	-0.162838
0	-0.133312
0	-0.305026
0	-0.00442295
0	-0.0693374
0	0.0511894
0	-0.491463
0	0.0632624
0	-0.144366
0	-0.205507
0	-0.204993
0	-0.106099
0	0.227142
0	-0.156168
0	-0.154053
0	0.80475
0	0.00534946
0	-0.130791
0	-0.0110767
0	-0.120109
0	-0.191728
0	-0.212421
0	-0.063189
0	-0.163794
0	-0.0922086
0	-0.139972
0	-0.119667
0	0.0768667
0	-0.10263
0	0.00889636
0	-0.0984951
0	0.0237104
0	0.0693468
0	-0.269795
0	0.0101244
0	-0.0349668
0	0.184986
0	0.0986186
0	-0.139116
0	-0.153149
0	-0.0587609
0	-0.186818
0	-0.157574
0	-0.187492
0	0.00134399
0	-0.179096
0	-0.276821
0	-0.141272
0	-0.150447
0	-0.186738
0	0.160349
0	-0.123205
0	-0.219089
0	-0.153146
0	0.136998
0	-0.139465
0	-0.100734
[truncated: 7,073 more rows]
