# Supplementary material for: A robust method for measuring aminoacylation through tRNA-Seq
Source: eLife. 2024 Jul 30;12:RP91554. doi: 10.7554/eLife.91554 (PMC11288633; doi:10.7554/eLife.91554)
Supplement: Figure 5—figure supplement 3—source data 1. [file elife-91554-fig5-figsupp3-data1.xlsx]

## Sheet: Fig5S3B
barcode	charge
l1Sp	49.21
l2Sp	50.5141
l3Sp	50.9666
l5Sp	49.45
l7Sp	51.0666
l8Sp	49.1071
l9Sp	49.9909
l1Sp	49.5264
l2Sp	50.6763
l3Sp	50.2053
l5Sp	48.6375
l6Sp	49.3757
l7Sp	50.4639
l8Sp	48.1945
l9Sp	49.6789
l1Sp	48.5602
l2Sp	49.223
l3Sp	51.7546
l5Sp	49.3884
l6Sp	52.0111
l7Sp	51.3852
l8Sp	48.2956
l9Sp	51.7162
l1Sp	51.1244
l2Sp	50.6132
l3Sp	50.6386
l5Sp	50.4618
l6Sp	50.7024
l7Sp	49.084
l8Sp	49.2951
l9Sp	51.066
l1Sp	50.7533
l2Sp	49.396
l3Sp	49.2694
l5Sp	50.0965
l6Sp	51.4582
l7Sp	51.2199
l8Sp	50.7097
l9Sp	51.819
l1Sp	51.1699
l2Sp	48.1155
l3Sp	49.4697
l5Sp	49.565
l6Sp	51.7677
l7Sp	48.7549
l8Sp	49.7066
l9Sp	48.7773
l1Sp	50.1055
l2Sp	52.0429
l3Sp	50.3474
l5Sp	49.5183
l6Sp	51.4395
l7Sp	50.2054
l8Sp	49.8058
l1Sp	53.2229
l2Sp	51.6926
l3Sp	52.317
l5Sp	50.376
l6Sp	51.8239
l7Sp	50.5371
l9Sp	50.5131
l1Sp	51.18
l2Sp	50.1995
l3Sp	51.5362
l5Sp	48.6682
l6Sp	51.2001
l8Sp	50.3989
l9Sp	49.8886
l1Sp	49.3542
l2Sp	50.7494
l3Sp	51.5925
l5Sp	52.1169
l7Sp	50.2806
l8Sp	49.6664
l9Sp	51.8605
