# Supplementary material for: A robust method for measuring aminoacylation through tRNA-Seq
Source: eLife. 2024 Jul 30;12:RP91554. doi: 10.7554/eLife.91554 (PMC11288633; doi:10.7554/eLife.91554)
Supplement: Figure 5—source data 1. [file elife-91554-fig5-data1.xlsx]

## Sheet: Fig5B
Predicted charge	Measured charge
97.1028	96.8561
96.8383	96.8561
96.8879	96.8561
96.5954	96.8561
1.25698	0.942869
0.930986	0.942869
1.21317	0.942869
0.912895	0.942869
1.11154	0.942869
0.742188	0.942869
0.870269	0.942869
0.780031	0.942869
1.02909	0.942869
0.820549	0.942869
0.703854	0.942869
7.41613	7.15036
6.83743	7.15036
7.31032	7.15036
5.88953	7.15036
6.99774	7.15036
7.18407	7.15036
6.37402	7.15036
17.9363	17.4311
18.5456	17.4311
16.3048	17.4311
18.5318	17.4311
17.582	17.4311
17.5695	17.4311
16.0755	17.4311
30.575	29.082
28.7197	29.082
31.5943	29.082
29.5018	29.082
27.7904	29.082
27.6903	29.082
26.8141	29.082
43.7952	42.3965
42.3258	42.3965
45.2553	42.3965
39.0637	42.3965
41.9951	42.3965
43.4123	42.3965
42.4913	42.3965
58.0706	57.7584
57.2435	57.7584
55.8447	57.7584
59.0241	57.7584
61.1993	57.7584
57.3301	57.7584
74.9838	75.6791
75.4752	75.6791
78.2316	75.6791
73.8841	75.6791
73.953	75.6791
75.2924	75.6791
74.0224	75.6791

## Sheet: Fig5C
barcode	pred_err
l5Sp	-0.346728
l5Sp	-0.133999
l5Sp	1.35452
l5Sp	0.804586
l5Sp	-0.588955
l5Sp	-0.310677
l5Sp	0.710519
l5Sp	0.38766
l5Sp	2.14364
l5Sp	0.0550514
l5Sp	1.29266
l5Sp	0.127302
l5Sp	0.838604
l5Sp	0.248589
l5Sp	0.797159
l5Sp	0.63756
l5Sp	0.0511428
l5Sp	0.383031
l5Sp	0.63604
l5Sp	0.0744182
l5Sp	0.0810144
l5Sp	-0.135305
l5Sp	0.265
l5Sp	0.497467
l5Sp	1.55657
l5Sp	-0.327229
l5Sp	0.351042
l5Sp	0.291894
l5Sp	0.195672
l5Sp	0.0777809
l5Sp	0.580545
l5Sp	0.190931
l5Sp	-0.228231
l5Sp	-0.0172839
l5Sp	0.0660554
l5Sp	0.209502
l5Sp	0.0818845
l5Sp	0.054926
l5Sp	0.390946
l5Sp	0.37875
l5Sp	0.361714
l5Sp	0.311219
l5Sp	0.0728261
l5Sp	0.0490908
l5Sp	0.633323
l5Sp	0.402988
l5Sp	-0.0615477
l5Sp	0.384233
l5Sp	0.860904
l5Sp	0.426043
l5Sp	0.520913
l5Sp	0.317218
l5Sp	0.392057
l5Sp	0.810311
l5Sp	0.244449
l5Sp	-0.0455276
l5Sp	0.71891
l5Sp	0.631873
l5Sp	0.377934
l5Sp	0.22134
l5Sp	0.673913
l5Sp	0.678475
l5Sp	0.678831
l5Sp	0.375612
l5Sp	0.180667
l5Sp	0.663214
l5Sp	-0.0942687
l5Sp	0.433583
l5Sp	0.581795
l5Sp	0.042978
l5Sp	-0.118441
l5Sp	0.909412
l5Sp	0.664304
l5Sp	0.203285
l5Sp	0.327421
l5Sp	0.279309
l5Sp	0.37016
l5Sp	0.19251
l5Sp	0.157459
l5Sp	0.0910533
l5Sp	0.437103
l5Sp	-0.0919043
l5Sp	0.233384
l5Sp	0.28258
l5Sp	-0.0207764
l5Sp	0.141759
l5Sp	1.28318
l5Sp	0.348931
l5Sp	0.648722
l5Sp	0.207091
l5Sp	-0.142092
l5Sp	0.160399
l5Sp	-0.0622525
l5Sp	0.622771
l5Sp	0.408384
l5Sp	0.543825
l5Sp	-0.778488
l5Sp	-0.458414
l5Sp	0.192836
l5Sp	0.58055
l5Sp	0.110797
l5Sp	0.380046
l5Sp	0.175163
l5Sp	0.779204
l5Sp	0.448462
l5Sp	0.336137
l5Sp	0.677302
l5Sp	0.776402
l5Sp	0.347938
l5Sp	0.843874
l5Sp	0.498604
l5Sp	0.416503
l5Sp	0.016966
l5Sp	-0.148248
l5Sp	0.516894
l5Sp	0.0690145
l5Sp	0.752121
l5Sp	0.630167
l5Sp	-0.326946
l5Sp	0.25622
l5Sp	0.947793
l5Sp	1.14203
l5Sp	0.690152
l5Sp	-0.340096
l5Sp	1.05185
l5Sp	1.78226
l5Sp	1.59824
l5Sp	1.66746
l5Sp	-0.777072
l5Sp	1.55218
l5Sp	1.60258
l5Sp	0.256378
l5Sp	0.569835
l5Sp	-0.364573
l5Sp	-0.0925904
l5Sp	-0.301517
l5Sp	0.193862
l5Sp	0.896115
l5Sp	0.50025
l5Sp	1.20293
l5Sp	0.297101
l5Sp	1.12357
l5Sp	-0.137294
l5Sp	0.293865
l5Sp	1.3677
l5Sp	0.493418
l5Sp	0.511828
l5Sp	-0.637463
l5Sp	0.339252
l5Sp	0.247322
l5Sp	0.189929
l5Sp	0.347076
l5Sp	-0.097447
l5Sp	0.370316
l5Sp	0.319295
l5Sp	0.216174
l5Sp	0.503752
l5Sp	-0.0284886
l5Sp	0.297725
l5Sp	0.273088
l5Sp	0.246724
l5Sp	0.29295
l6Sp	-0.566198
l6Sp	0.625615
l6Sp	-0.0306072
l6Sp	-0.0465523
l6Sp	1.13586
l6Sp	0.227025
l6Sp	-0.126145
l6Sp	0.304484
l6Sp	0.0960326
l6Sp	0.0419562
l6Sp	0.498717
l6Sp	-0.0260599
l6Sp	-0.180702
l6Sp	-0.363444
l6Sp	0.383185
l6Sp	-0.0853013
l6Sp	0.593819
l6Sp	-0.0207144
l6Sp	-0.250317
l6Sp	0.397394
l6Sp	-0.00948531
l6Sp	0.535263
l6Sp	0.4999
l6Sp	0.356718
l6Sp	0.693349
l6Sp	1.0284
l6Sp	0.309961
l6Sp	0.201576
l6Sp	0.266345
l6Sp	0.177575
l6Sp	-0.18478
l6Sp	0.0582251
l6Sp	0.128465
l6Sp	0.245523
l6Sp	0.0992302
l6Sp	0.108107
l6Sp	0.0234828
l6Sp	-0.186918
l6Sp	0.370294
l6Sp	-0.00357544
l6Sp	0.195165
l6Sp	0.191817
l6Sp	0.564302
l6Sp	0.286028
l6Sp	0.249213
l6Sp	-0.226313
l6Sp	-0.0539707
l6Sp	-0.178038
l6Sp	0.561655
l6Sp	0.294799
l6Sp	0.344873
l6Sp	-0.252504
l6Sp	-0.00983339
l6Sp	0.132293
l6Sp	0.145018
l6Sp	-0.0888177
l6Sp	-0.291568
l6Sp	0.236306
l6Sp	0.0269765
l6Sp	0.344939
l6Sp	0.442208
l6Sp	1.27034
l6Sp	0.468272
l6Sp	0.317941
l6Sp	0.662028
l6Sp	-0.114998
l6Sp	-0.0192202
l6Sp	0.487452
l6Sp	0.40983
l6Sp	0.258226
l6Sp	0.234257
l6Sp	0.854895
l6Sp	-0.150871
l6Sp	0.372346
l6Sp	0.0777109
l6Sp	0.221079
l6Sp	0.470821
l6Sp	-0.151341
l6Sp	0.119765
l6Sp	-0.0324676
l6Sp	0.423002
l6Sp	0.459414
l6Sp	-0.0335939
l6Sp	0.21211
l6Sp	0.312978
l6Sp	-0.0898435
l6Sp	-0.75468
l6Sp	0.440339
l6Sp	0.480782
l6Sp	0.588561
l6Sp	0.855893
l6Sp	0.250462
l6Sp	0.191505
l6Sp	0.362272
l6Sp	0.512204
l6Sp	-0.00893084
l6Sp	-0.147637
l6Sp	0.285082
l6Sp	-0.0143125
l6Sp	0.183786
l6Sp	0.0483212
l6Sp	0.00275248
l6Sp	-0.161585
l6Sp	-0.166997
l6Sp	-0.0645795
l6Sp	0.0784486
l6Sp	-0.0797295
l6Sp	0.152633
l6Sp	0.127716
l6Sp	0.0160462
l6Sp	-0.230846
l6Sp	0.0880204
l6Sp	0.548198
l6Sp	0.328748
l6Sp	0.0484075
l6Sp	0.325416
l6Sp	-0.472545
l6Sp	0.760999
l6Sp	0.836116
l6Sp	-0.0418452
l6Sp	-0.300253
l6Sp	0.0504216
l6Sp	0.612756
l6Sp	0.390834
l6Sp	0.241072
l6Sp	-1.20788
l6Sp	-0.282252
l6Sp	-0.0259428
l6Sp	-0.11534
l6Sp	-0.0265859
l6Sp	-0.377081
l6Sp	0.072121
l6Sp	0.795746
l6Sp	0.595598
l6Sp	0.773593
l6Sp	1.26115
l6Sp	0.5503
l6Sp	-0.374262
l6Sp	-0.194569
l6Sp	1.45246
l6Sp	0.511779
l6Sp	0.020788
l6Sp	1.25355
l6Sp	0.381251
l6Sp	0.50649
l6Sp	0.584633
l6Sp	0.940375
l6Sp	0.59798
l6Sp	-0.0275172
l6Sp	0.360429
l6Sp	-0.0391684
l6Sp	0.0249467
l6Sp	0.234726
l6Sp	-0.0747613
l6Sp	0.277363
l6Sp	0.0631657
l6Sp	-0.125151
l6Sp	0.407162
l6Sp	-0.699626
l6Sp	0.197833
l6Sp	-0.0178232
l6Sp	0.0779678
l8Sp	-0.0274355
l8Sp	-0.291223
l8Sp	-1.38645
l8Sp	-0.404838
l8Sp	-0.273893
l8Sp	0.585259
l8Sp	-0.61204
l8Sp	-0.6705
l8Sp	-0.99386
l8Sp	-0.0526894
l8Sp	-1.51308
l8Sp	-0.39335
l8Sp	-0.596157
l8Sp	0.717986
l8Sp	-1.18858
l8Sp	-0.098459
l8Sp	-1.90489
l8Sp	-0.723347
l8Sp	0.233754
l8Sp	-0.619669
l8Sp	-0.209888
l8Sp	-0.276923
l8Sp	-0.715438
l8Sp	-1.06375
l8Sp	-1.48247
l8Sp	-0.194589
l8Sp	-0.342184
l8Sp	-0.307956
l8Sp	-0.26861
l8Sp	-0.163133
l8Sp	0.00669345
l8Sp	-0.0965103
l8Sp	-0.164479
l8Sp	-0.222691
l8Sp	-0.119922
l8Sp	-0.118831
l8Sp	-0.337611
l8Sp	-0.0640256
l8Sp	-0.426473
l8Sp	-0.172041
l8Sp	-0.787241
l8Sp	-0.297863
l8Sp	0.300257
l8Sp	-0.190231
l8Sp	-0.413868
l8Sp	-0.121823
l8Sp	-0.0156951
l8Sp	-0.139278
l8Sp	-1.03678
l8Sp	-0.421911
l8Sp	-0.53421
l8Sp	-0.139712
l8Sp	0.284557
l8Sp	-0.64194
l8Sp	-0.312577
l8Sp	-0.21491
l8Sp	0.425282
l8Sp	-0.949874
l8Sp	-0.263402
l8Sp	-0.812797
l8Sp	-1.31876
l8Sp	-1.20212
l8Sp	-1.12077
l8Sp	-0.960589
l8Sp	-0.918443
l8Sp	-0.721218
l8Sp	-0.0153486
l8Sp	-0.601888
l8Sp	-0.500153
l8Sp	-0.186947
l8Sp	0.1992
l8Sp	-1.19252
l8Sp	-0.3299
l8Sp	-0.288169
l8Sp	-0.149763
l8Sp	-0.437289
l8Sp	-0.707193
l8Sp	-0.0279234
l8Sp	-0.244605
l8Sp	-0.056491
l8Sp	-0.915013
l8Sp	-0.460524
l8Sp	0.158692
l8Sp	-0.387381
l8Sp	0.101697
l8Sp	-0.0756935
l8Sp	-0.891506
l8Sp	-0.526789
l8Sp	-0.547714
l8Sp	-0.300967
l8Sp	-0.351838
l8Sp	-0.010808
l8Sp	0.557426
l8Sp	-0.594
l8Sp	-0.748377
l8Sp	-0.169404
l8Sp	0.0583431
l8Sp	0.499786
l8Sp	-0.26243
l8Sp	-0.106299
l8Sp	-0.34333
l8Sp	-0.334256
l8Sp	-0.230063
l8Sp	-0.0202294
l8Sp	-0.316289
l8Sp	-0.205045
l8Sp	0.005843
l8Sp	-0.933517
l8Sp	-0.4835
l8Sp	-0.531947
l8Sp	-0.289687
l8Sp	-0.328516
l8Sp	-1.18496
l8Sp	0.10456
l8Sp	0.0503114
l8Sp	-0.171518
l8Sp	0.357044
l8Sp	-1.24036
l8Sp	-0.399417
l8Sp	-0.0197106
l8Sp	-0.345578
l8Sp	-0.667728
l8Sp	-0.715713
l8Sp	0.0712248
l8Sp	-0.660746
l8Sp	-1.55268
l8Sp	0.161306
l8Sp	-1.37241
l8Sp	0.514002
l8Sp	-0.161346
l8Sp	-0.328779
l8Sp	0.756289
l8Sp	-0.777309
l8Sp	-0.618153
l8Sp	-2.17015
l8Sp	-1.50242
l8Sp	-1.70491
l8Sp	-1.33572
l8Sp	-2.03731
l8Sp	-3.53368
l8Sp	-1.06497
l8Sp	-2.04877
l8Sp	-1.07646
l8Sp	-1.35844
l8Sp	-1.59379
l8Sp	-1.5372
l8Sp	-2.3534
l8Sp	-0.0760429
l8Sp	-0.148296
l8Sp	-0.112675
l8Sp	-0.437311
l8Sp	-0.234384
l8Sp	-0.247463
l8Sp	-0.327728
l8Sp	-0.460782
l8Sp	-0.287716
l8Sp	-0.172225
l8Sp	-0.282504
l8Sp	-0.457032
l8Sp	-0.225346
l8Sp	0.0317967
l8Sp	-0.201062
l9Sp	0.940362
l9Sp	-0.200393
l9Sp	0.0625337
l9Sp	-0.353195
l9Sp	-0.273015
l9Sp	-0.501608
l9Sp	0.0276653
l9Sp	-0.0216449
l9Sp	-1.24581
l9Sp	-0.0443182
l9Sp	-0.278293
l9Sp	0.292108
l9Sp	-0.061745
l9Sp	-0.603131
l9Sp	0.00823875
l9Sp	-0.453799
l9Sp	1.25993
l9Sp	0.36103
l9Sp	-0.619477
l9Sp	0.147857
l9Sp	0.138359
l9Sp	-0.123035
l9Sp	-0.0494624
l9Sp	0.209565
l9Sp	-0.767446
l9Sp	-0.506581
l9Sp	-0.318819
l9Sp	-0.185514
l9Sp	-0.193406
l9Sp	-0.0922228
l9Sp	-0.402458
l9Sp	-0.152646
l9Sp	0.264245
l9Sp	-0.00554839
l9Sp	-0.0453636
l9Sp	-0.198779
l9Sp	0.232243
l9Sp	0.196017
l9Sp	-0.334768
l9Sp	-0.203133
l9Sp	0.230363
l9Sp	-0.205173
l9Sp	-0.937385
l9Sp	-0.144888
l9Sp	-0.468669
l9Sp	-0.0548512
l9Sp	0.131213
l9Sp	-0.066917
l9Sp	-0.385776
l9Sp	-0.298932
l9Sp	-0.331576
l9Sp	0.0749983
l9Sp	-0.66678
l9Sp	-0.300664
l9Sp	-0.0768907
l9Sp	0.349255
l9Sp	-0.852624
l9Sp	0.0816951
l9Sp	-0.141508
l9Sp	0.246517
l9Sp	0.202641
l9Sp	-0.746693
l9Sp	-0.0263365
l9Sp	0.267036
l9Sp	0.0757482
l9Sp	0.173002
l9Sp	0.128838
l9Sp	-0.319147
l9Sp	-0.491471
l9Sp	-0.114256
l9Sp	-0.315016
l9Sp	-0.571791
l9Sp	-0.183533
l9Sp	-0.287461
l9Sp	-0.255369
l9Sp	-0.0630984
l9Sp	-0.133788
l9Sp	-0.0132454
l9Sp	-0.0326191
l9Sp	-0.00209461
l9Sp	0.0549083
l9Sp	0.0930147
l9Sp	-0.358483
l9Sp	-0.107308
l9Sp	-0.393899
l9Sp	0.0237781
l9Sp	0.36301
l9Sp	-0.262481
l9Sp	-0.58179
l9Sp	-0.494685
l9Sp	-0.361962
l9Sp	-0.400054
l9Sp	-0.686679
l9Sp	-0.391043
l9Sp	-0.172211
l9Sp	-0.365491
l9Sp	0.867782
l9Sp	-0.326454
l9Sp	0.0839066
l9Sp	-0.658037
l9Sp	0.184212
l9Sp	-0.0485432
l9Sp	0.216485
l9Sp	-0.591978
l9Sp	-0.067593
l9Sp	-0.20954
l9Sp	-0.603415
l9Sp	0.00448234
l9Sp	0.00784605
l9Sp	-0.327973
l9Sp	0.0219291
l9Sp	-0.176008
l9Sp	0.619793
l9Sp	-0.28506
l9Sp	-0.615612
l9Sp	-0.222913
l9Sp	-0.63662
l9Sp	-0.150807
l9Sp	-0.109753
l9Sp	-0.194664
l9Sp	-0.301962
l9Sp	-0.524728
l9Sp	-0.587195
l9Sp	-0.121962
l9Sp	-0.632177
l9Sp	0.978301
l9Sp	-1.47729
l9Sp	-0.269105
l9Sp	0.37841
l9Sp	-1.36425
l9Sp	-0.89672
l9Sp	-1.08479
l9Sp	-0.588272
l9Sp	0.387127
l9Sp	1.48915
l9Sp	0.542788
l9Sp	0.960746
l9Sp	0.81387
l9Sp	1.73163
l9Sp	0.8783
l9Sp	0.256087
l9Sp	0.904413
l9Sp	-0.0397993
l9Sp	0.683327
l9Sp	-0.280398
l9Sp	0.459154
l9Sp	0.901198
l9Sp	0.115526
l9Sp	-0.163439
l9Sp	-0.495075
l9Sp	0.286551
l9Sp	-0.137639
l9Sp	0.110184
l9Sp	0.0321727
l9Sp	-0.135876
l9Sp	0.00837636
l9Sp	-0.206376
l9Sp	-0.0961698
l9Sp	0.858933
l9Sp	-0.245575
l9Sp	-0.260697
l9Sp	-0.169856
l3Sp	-0.125986
l3Sp	0.200327
l3Sp	0.191659
l3Sp	0.274804
l3Sp	0.661692
l3Sp	-0.00763243
l3Sp	0.0627595
l3Sp	-0.527652
l3Sp	0.146864
l3Sp	-0.216656
l3Sp	0.288531
l3Sp	-0.0129116
l3Sp	0.251741
l3Sp	0.0221944
l3Sp	-0.0206617
l3Sp	0.186243
l3Sp	-0.0406592
l3Sp	-0.0780405
l3Sp	0.195659
l3Sp	-0.0539444
l3Sp	0.150179
l3Sp	-0.0271159
l3Sp	0.000738129
l3Sp	-0.127478
l3Sp	-0.013721
l3Sp	0.0154683
l3Sp	0.0458725
l3Sp	7.63105e-06
l3Sp	-0.0361755
l3Sp	-0.0516599
l3Sp	-0.136152
l3Sp	0.214542
l3Sp	-0.0660028
l3Sp	-0.0947122
l3Sp	0.0532757
l3Sp	0.0382602
l3Sp	0.662913
l3Sp	0.0836091
l3Sp	0.123379
l3Sp	0.0340143
l3Sp	-0.00476363
l3Sp	-0.0323952
l3Sp	-0.0215557
l3Sp	0.222948
l3Sp	0.0209024
l3Sp	0.00891126
l3Sp	-0.019641
l3Sp	0.0588045
l3Sp	-0.251664
l3Sp	-0.0425447
l3Sp	-0.0852847
l3Sp	-0.0653405
l3Sp	0.24486
l3Sp	0.0238615
l3Sp	0.0803113
l3Sp	0.0104514
l3Sp	0.115124
l3Sp	0.51168
l3Sp	0.0302421
l3Sp	0.0962732
l3Sp	0.0289193
l3Sp	-0.0542228
l3Sp	0.484802
l3Sp	0.127528
l3Sp	0.128392
l3Sp	0.208504
l3Sp	0.338616
l3Sp	0.273638
l3Sp	0.536645
l3Sp	0.0214327
l3Sp	0.137798
l3Sp	0.0877877
l3Sp	0.163164
l3Sp	-0.00254313
l3Sp	-0.132019
l3Sp	-0.148326
l3Sp	-0.0999199
l3Sp	0.163752
l3Sp	0.018593
l3Sp	0.161282
l3Sp	-0.0528015
l3Sp	-0.174157
l3Sp	0.0386167
l3Sp	0.208775
l3Sp	-0.143018
l3Sp	-0.075742
l3Sp	0.108967
l3Sp	0.190876
l3Sp	0.263809
l3Sp	0.0518279
l3Sp	0.144087
l3Sp	0.152612
l3Sp	0.168644
l3Sp	-0.0485142
l3Sp	0.100676
l3Sp	-0.112219
l3Sp	0.14403
l3Sp	-0.234175
l3Sp	0.0244913
l3Sp	0.076735
l3Sp	-0.166163
l3Sp	0.118984
l3Sp	0.0267366
l3Sp	0.0168112
l3Sp	-0.0253478
l3Sp	0.0919932
l3Sp	0.00950721
l3Sp	0.0755945
l3Sp	0.0320373
l3Sp	-0.0394234
l3Sp	0.154885
l3Sp	0.251103
l3Sp	0.057315
l3Sp	0.232796
l3Sp	0.162274
l3Sp	0.103993
l3Sp	0.0607041
l3Sp	0.172258
l3Sp	0.13337
l3Sp	0.18103
l3Sp	0.0191927
l3Sp	0.0125879
l3Sp	0.159368
l3Sp	0.0674985
l3Sp	0.0272714
l3Sp	-0.184867
l3Sp	-0.190776
l3Sp	-0.0154254
l3Sp	-0.0602532
l3Sp	0.0976228
l3Sp	-0.0874288
l3Sp	0.160371
l3Sp	-0.134282
l3Sp	0.315878
l3Sp	0.393159
l3Sp	0.0642565
l3Sp	-0.0375813
l3Sp	0.65876
l3Sp	-0.286077
l3Sp	-0.113107
l3Sp	0.0392186
l3Sp	0.0102316
l3Sp	0.390577
l3Sp	0.248393
l3Sp	0.305162
l3Sp	0.266344
l3Sp	0.274063
l3Sp	0.0660236
l3Sp	0.354336
l3Sp	-0.10739
l3Sp	0.242621
l3Sp	0.020597
l3Sp	-0.115176
l3Sp	0.00822609
l3Sp	0.108506
l3Sp	0.0283437
l3Sp	0.0731918
l3Sp	-0.0489
l3Sp	0.0385634
l3Sp	-0.0170583
l3Sp	0.314114
l3Sp	0.11873
l2Sp	0.547819
l2Sp	0.064088
l2Sp	-0.00326015
l2Sp	0.235341
l2Sp	0.416159
l2Sp	0.296297
l2Sp	0.270027
l2Sp	0.185755
l2Sp	0.590517
l2Sp	0.316242
l2Sp	0.245205
l2Sp	0.325288
l2Sp	0.36628
l2Sp	0.562466
l2Sp	0.321584
l2Sp	0.207414
l2Sp	0.731198
l2Sp	0.799346
l2Sp	0.497208
l2Sp	0.477537
l2Sp	0.258369
l2Sp	0.268507
l2Sp	0.523164
l2Sp	0.675222
l2Sp	0.150328
l2Sp	0.206184
l2Sp	0.463292
l2Sp	0.222268
l2Sp	0.613959
l2Sp	0.159527
l2Sp	0.561957
l2Sp	0.422874
l2Sp	0.674793
l2Sp	0.268799
l2Sp	0.226974
l2Sp	0.296089
l2Sp	0.506698
l2Sp	0.206073
l2Sp	0.285837
l2Sp	0.230668
l2Sp	0.649932
l2Sp	0.425389
l2Sp	0.481355
l2Sp	0.42323
l2Sp	0.637204
l2Sp	0.58172
l2Sp	0.174641
l2Sp	0.186763
l2Sp	0.634999
l2Sp	0.491943
l2Sp	0.662781
l2Sp	0.474387
l2Sp	0.340218
l2Sp	0.532622
l2Sp	0.151014
l2Sp	0.161438
l2Sp	0.0243188
l2Sp	0.559181
l2Sp	0.307278
l2Sp	0.132621
l2Sp	0.293534
l2Sp	0.094191
l2Sp	-0.230252
l2Sp	0.23549
l2Sp	0.434212
l2Sp	0.320998
l2Sp	0.240809
l2Sp	0.305779
l2Sp	-0.114895
l2Sp	0.403728
l2Sp	0.544062
l2Sp	0.37451
l2Sp	0.243596
l2Sp	0.192293
l2Sp	0.464374
l2Sp	0.695691
l2Sp	0.382418
l2Sp	0.187135
l2Sp	0.170242
l2Sp	0.0869602
l2Sp	0.200576
l2Sp	0.406806
l2Sp	0.339615
l2Sp	-0.0221531
l2Sp	0.232348
l2Sp	0.0190801
l2Sp	0.153674
l2Sp	0.68473
l2Sp	0.298129
l2Sp	0.283039
l2Sp	0.121201
l2Sp	0.0839423
l2Sp	0.108967
l2Sp	0.517182
l2Sp	0.202154
l2Sp	0.33041
l2Sp	0.162188
l2Sp	0.220234
l2Sp	0.510091
l2Sp	0.349732
l2Sp	0.200669
l2Sp	0.200442
l2Sp	0.261188
l2Sp	0.0188604
l2Sp	0.442833
l2Sp	-0.0853375
l2Sp	0.454036
l2Sp	0.240132
l2Sp	0.0146936
l2Sp	0.536892
l2Sp	0.42179
l2Sp	-0.252406
l2Sp	-0.666273
l2Sp	0.0807386
l2Sp	0.0972918
l2Sp	0.0766704
l2Sp	0.247434
l2Sp	-0.0711586
l2Sp	0.104184
l2Sp	0.0537943
l2Sp	0.51765
l2Sp	0.379077
l2Sp	0.108925
l2Sp	0.0568919
l2Sp	0.619319
l2Sp	0.708516
l2Sp	0.357595
l2Sp	0.164243
l2Sp	0.12442
l2Sp	0.444908
l2Sp	-0.0522539
l2Sp	-0.0736742
l2Sp	0.421192
l2Sp	0.13664
l2Sp	0.251458
l2Sp	0.489142
l2Sp	0.743278
l2Sp	0.398277
l2Sp	-0.237479
l2Sp	0.102075
l2Sp	0.0552106
l2Sp	-0.00985363
l2Sp	0.3035
l2Sp	0.289002
l2Sp	0.20556
l2Sp	0.373069
l2Sp	0.194774
l2Sp	0.209403
l2Sp	0.067674
l2Sp	0.486966
l2Sp	-0.000357852
l2Sp	0.436649
l2Sp	0.0711735
l2Sp	0.305081
l2Sp	0.273305
l2Sp	0.149152
l2Sp	0.352521
l2Sp	0.237932
l2Sp	0.104696
l2Sp	-0.111078
l2Sp	-0.0118836
l2Sp	0.203944
l4Sp	-0.125234
l4Sp	-0.107692
l4Sp	0.304358
l4Sp	0.254952
l4Sp	-0.147983
l4Sp	0.020197
l4Sp	0.151794
l4Sp	0.130112
l4Sp	-0.048086
l4Sp	0.733665
l4Sp	0.151696
l4Sp	0.119222
l4Sp	0.0522062
l4Sp	0.778602
l4Sp	0.220428
l4Sp	-0.111046
l4Sp	-0.393781
l4Sp	0.261811
l4Sp	-0.149461
l4Sp	0.0363804
l4Sp	0.0123759
l4Sp	0.292134
l4Sp	0.296452
l4Sp	0.129682
l4Sp	0.0775748
l4Sp	-0.264266
l4Sp	-0.0648055
l4Sp	0.0998906
l4Sp	-0.0349734
l4Sp	0.0607409
l4Sp	0.0670191
l4Sp	-0.0460172
l4Sp	0.187033
l4Sp	0.0121448
l4Sp	-0.0178685
l4Sp	-0.0947464
l4Sp	-0.0394361
l4Sp	0.15026
l4Sp	0.219391
l4Sp	0.0706945
l4Sp	-0.0598455
l4Sp	-0.0187295
l4Sp	-0.113498
l4Sp	0.248912
l4Sp	0.189602
l4Sp	-0.0461778
l4Sp	0.241416
l4Sp	-0.0466392
l4Sp	-0.0321064
l4Sp	0.00373565
l4Sp	-0.142189
l4Sp	-0.0780595
l4Sp	-0.054242
l4Sp	-0.0825192
l4Sp	0.125314
l4Sp	0.00775604
l4Sp	0.140389
l4Sp	-0.178671
l4Sp	-0.0027948
l4Sp	0.310532
l4Sp	0.514182
l4Sp	0.193473
l4Sp	0.245144
l4Sp	0.108172
l4Sp	-0.15181
l4Sp	-0.0965554
l4Sp	0.102852
l4Sp	0.0855762
l4Sp	0.385633
l4Sp	0.0137455
l4Sp	-0.0714547
l4Sp	0.0584851
l4Sp	-0.0105844
l4Sp	0.0185029
l4Sp	0.0286549
l4Sp	-0.161153
l4Sp	0.181919
l4Sp	0.125028
l4Sp	0.106563
l4Sp	0.225913
l4Sp	-0.00145093
l4Sp	0.115609
l4Sp	0.143121
l4Sp	-0.103826
l4Sp	0.161757
l4Sp	0.016237
l4Sp	-0.19135
l4Sp	-0.0469199
l4Sp	-0.0302819
l4Sp	0.103112
l4Sp	0.0957945
l4Sp	0.119279
l4Sp	-0.0420263
l4Sp	0.0120004
l4Sp	0.0767601
l4Sp	-0.0172373
l4Sp	-0.310402
l4Sp	0.0790477
l4Sp	0.0152909
l4Sp	0.016623
l4Sp	0.120703
l4Sp	-0.0554239
l4Sp	0.0209187
l4Sp	0.157421
l4Sp	0.0322067
l4Sp	0.0301554
l4Sp	0.0828908
l4Sp	-0.0717231
l4Sp	-0.0232346
l4Sp	0.0528386
l4Sp	0.044054
l4Sp	0.185019
l4Sp	0.163193
l4Sp	-0.0534144
l4Sp	-0.0375891
l4Sp	0.157775
l4Sp	-0.0790074
l4Sp	-0.105856
l4Sp	0.0378647
l4Sp	-0.0180931
l4Sp	-0.267741
l4Sp	-0.103114
l4Sp	0.0604491
l4Sp	0.0212768
l4Sp	-0.0539574
l4Sp	-0.119375
l4Sp	-0.0604028
l4Sp	-0.0547875
l4Sp	0.0834139
l4Sp	-0.124781
l4Sp	-0.0244548
l4Sp	-0.00125624
l4Sp	0.0105165
l4Sp	0.0934169
l4Sp	0.0547773
l4Sp	0.1886
l4Sp	0.001172
l4Sp	-0.206519
l4Sp	0.323207
l4Sp	0.361437
l4Sp	0.0299013
l4Sp	0.314653
l4Sp	0.104168
l4Sp	-0.0713889
l4Sp	0.0072841
l4Sp	0.0450069
l4Sp	0.036181
l4Sp	0.0890699
l4Sp	0.355688
l4Sp	0.212644
l4Sp	0.281542
l4Sp	-0.00812179
l4Sp	0.186428
l4Sp	0.13704
l4Sp	-0.0337776
l4Sp	0.0844736
l4Sp	0.114588
l4Sp	0.0122041
l4Sp	-0.35399
l4Sp	0.257954
l4Sp	0.270302
l4Sp	0.0627969
l7Sp	-0.00686101
l7Sp	0.311583
l7Sp	0.267873
l7Sp	-0.0187926
l7Sp	0.130203
l7Sp	-0.0991974
l7Sp	0.244917
l7Sp	0.0961999
l7Sp	-0.0476563
l7Sp	0.0162964
l7Sp	0.221645
l7Sp	0.340238
l7Sp	0.143238
l7Sp	-0.472855
l7Sp	0.0786334
l7Sp	-0.0103759
l7Sp	-0.112789
l7Sp	-0.16541
l7Sp	-0.0417513
l7Sp	0.169055
l7Sp	-0.0579032
l7Sp	-0.00434242
l7Sp	0.0294645
l7Sp	0.0685136
l7Sp	0.512086
l7Sp	0.0861621
l7Sp	0.200288
l7Sp	0.0442991
l7Sp	0.151702
l7Sp	-0.123308
l7Sp	-0.0193038
l7Sp	0.177135
l7Sp	-0.145378
l7Sp	0.0791422
l7Sp	-0.0906457
l7Sp	0.14067
l7Sp	-0.106272
l7Sp	0.0566063
l7Sp	-0.0452189
l7Sp	0.145496
l7Sp	0.0092814
l7Sp	0.0516997
l7Sp	0.0629452
l7Sp	-0.0436367
l7Sp	-0.149821
l7Sp	0.205443
l7Sp	0.0298574
l7Sp	0.144061
l7Sp	0.317363
l7Sp	0.0924615
l7Sp	0.051259
l7Sp	0.119082
l7Sp	-0.212655
l7Sp	0.232836
l7Sp	0.0739168
l7Sp	-0.0128127
l7Sp	-0.0590069
l7Sp	0.0354683
l7Sp	0.198658
l7Sp	0.15189
l7Sp	0.334482
l7Sp	0.134501
l7Sp	0.158185
l7Sp	0.0445286
l7Sp	0.258338
l7Sp	0.0137644
l7Sp	-0.127366
l7Sp	-0.100953
l7Sp	0.0292936
l7Sp	0.0817158
l7Sp	0.0975433
l7Sp	0.00860571
l7Sp	0.0378096
l7Sp	0.183316
l7Sp	0.0646282
l7Sp	0.261889
l7Sp	0.153461
l7Sp	-0.114517
l7Sp	0.206029
l7Sp	-0.0330632
l7Sp	0.0851913
l7Sp	-0.00280143
l7Sp	-0.072028
l7Sp	0.115008
l7Sp	0.150768
l7Sp	0.38731
l7Sp	0.0429988
l7Sp	-0.0171063
l7Sp	0.0108097
l7Sp	0.18353
l7Sp	0.132386
l7Sp	0.106192
l7Sp	0.308954
l7Sp	0.126889
l7Sp	0.0193503
l7Sp	-0.0469808
l7Sp	0.122841
l7Sp	0.160586
l7Sp	0.0563778
l7Sp	-0.0792599
l7Sp	0.0830934
l7Sp	0.215023
l7Sp	0.135537
l7Sp	0.220019
l7Sp	0.102299
l7Sp	0.274568
l7Sp	0.0223672
l7Sp	0.0288579
l7Sp	0.0951882
l7Sp	0.0630614
l7Sp	-0.0857526
l7Sp	0.0443588
l7Sp	-0.0110235
l7Sp	0.0761599
l7Sp	0.0589358
l7Sp	-0.0137017
l7Sp	0.214158
l7Sp	0.0699923
l7Sp	0.11079
l7Sp	0.00726631
l7Sp	0.0893483
l7Sp	-0.055852
l7Sp	0.120367
l7Sp	-0.0568855
l7Sp	0.404321
l7Sp	0.0708576
l7Sp	0.176506
l7Sp	0.022975
l7Sp	0.0653333
l7Sp	0.16608
l7Sp	-0.0348819
l7Sp	0.345717
l7Sp	0.307763
l7Sp	0.154606
l7Sp	0.0812485
l7Sp	0.544603
l7Sp	0.0940207
l7Sp	0.00384687
l7Sp	0.743222
l7Sp	0.061305
l7Sp	0.204648
l7Sp	0.0836576
l7Sp	0.226124
l7Sp	-0.045035
l7Sp	-0.0446506
l7Sp	0.126401
l7Sp	0.280966
l7Sp	0.221971
l7Sp	-0.287429
l7Sp	-0.0362875
l7Sp	-0.31884
l7Sp	0.0756812
l7Sp	0.0548483
l7Sp	0.336926
l7Sp	0.390361
l7Sp	0.0386441
l7Sp	0.07897
l7Sp	0.181557
l7Sp	-0.184541
l7Sp	0.276224
l7Sp	-0.0299746
l7Sp	0.0477931
l8Sp	-0.208227
l8Sp	-0.21405
l8Sp	-0.0563884
l8Sp	0.124413
l8Sp	-0.0334872
l8Sp	0.0224281
l8Sp	0.233107
l8Sp	-0.0275422
l8Sp	0.0423122
l8Sp	-0.477754
l8Sp	0.0952135
l8Sp	0.345134
l8Sp	-0.0287413
l8Sp	-0.231723
l8Sp	0.447557
l8Sp	0.201343
l8Sp	0.290905
l8Sp	-0.0230496
l8Sp	0.112846
l8Sp	0.146947
l8Sp	-0.0129963
l8Sp	0.110087
l8Sp	0.0840217
l8Sp	-0.134966
l8Sp	0.469307
l8Sp	0.114336
l8Sp	0.0609536
l8Sp	0.048626
l8Sp	-0.0506477
l8Sp	0.366567
l8Sp	0.106933
l8Sp	0.00126785
l8Sp	0.0161991
l8Sp	0.170673
l8Sp	0.173365
l8Sp	0.0534212
l8Sp	-0.28928
l8Sp	0.0298299
l8Sp	0.0224263
l8Sp	0.0766605
l8Sp	0.00712604
l8Sp	0.0878816
l8Sp	0.0511708
l8Sp	0.020326
l8Sp	-0.0409126
l8Sp	-0.0738611
l8Sp	0.146932
l8Sp	0.0518894
l8Sp	-0.194285
l8Sp	0.0226259
l8Sp	0.153888
l8Sp	0.0572282
l8Sp	-0.118998
l8Sp	0.0205075
l8Sp	0.0853824
l8Sp	0.00183705
l8Sp	-0.0901059
l8Sp	-0.33604
l8Sp	0.0729628
l8Sp	-0.26229
l8Sp	-0.0559212
l8Sp	0.136957
l8Sp	-0.0288418
l8Sp	-0.0499761
l8Sp	0.118778
l8Sp	0.735513
l8Sp	0.0343332
l8Sp	0.201089
l8Sp	-0.106077
l8Sp	0.114978
l8Sp	-0.0755317
l8Sp	-0.0609675
l8Sp	-0.0818649
l8Sp	0.00705143
l8Sp	-0.0363465
l8Sp	0.204658
l8Sp	-0.127988
l8Sp	0.228335
l8Sp	0.000755964
l8Sp	0.073041
l8Sp	0.0331959
l8Sp	0.0444052
l8Sp	-0.022204
l8Sp	0.0942106
l8Sp	0.125669
l8Sp	0.190819
l8Sp	0.939297
l8Sp	0.0476089
l8Sp	0.198807
l8Sp	0.0653085
l8Sp	-0.106371
l8Sp	0.0629029
l8Sp	0.0712368
l8Sp	0.0113804
l8Sp	0.0190915
l8Sp	0.104095
l8Sp	0.405359
l8Sp	0.401894
l8Sp	0.156572
l8Sp	0.0930829
l8Sp	0.0829373
l8Sp	0.00336675
l8Sp	0.239744
l8Sp	0.0981892
l8Sp	0.0440075
l8Sp	0.285177
l8Sp	0.237217
l8Sp	0.293603
l8Sp	0.132967
l8Sp	-0.016359
l8Sp	-0.0187633
l8Sp	-0.0567361
l8Sp	0.0304086
l8Sp	0.126732
l8Sp	0.141524
l8Sp	-0.0381484
l8Sp	0.0435012
l8Sp	0.0850248
l8Sp	-0.0177325
l8Sp	0.101307
l8Sp	-0.00149181
l8Sp	0.35997
l8Sp	-0.0407228
l8Sp	-0.118969
l8Sp	0.156437
l8Sp	-0.116413
l8Sp	0.0679565
l8Sp	-0.0305068
l8Sp	0.14071
l8Sp	-0.0399864
l8Sp	0.312538
l8Sp	-0.281168
l8Sp	0.405728
l8Sp	0.0024886
l8Sp	0.0243913
l8Sp	-0.239197
l8Sp	0.267636
l8Sp	-0.475833
l8Sp	-0.090554
l8Sp	-0.223945
l8Sp	0.139982
l8Sp	-0.0982076
l8Sp	0.313869
l8Sp	-0.00656595
l8Sp	-0.0366486
l8Sp	-0.0255206
l8Sp	-0.0969485
l8Sp	-0.00639184
l8Sp	0.151183
l8Sp	-0.00503038
l8Sp	0.0699687
l8Sp	0.0236928
l8Sp	-0.0450857
l8Sp	0.0522516
l8Sp	0.47431
l8Sp	0.0665148
l8Sp	0.0326239
l8Sp	0.45025
l8Sp	0.279512
l8Sp	0.263048
l8Sp	0.168675
l8Sp	0.0565852
l5Sp	0.0924714
l5Sp	0.133819
l5Sp	0.265319
l5Sp	0.0356832
l5Sp	-0.0313073
l5Sp	-0.365249
l5Sp	-0.0724819
l5Sp	0.40883
l5Sp	-0.0500567
l5Sp	0.363175
l5Sp	0.000317912
l5Sp	-0.0627234
l5Sp	-0.109902
l5Sp	0.426554
l5Sp	0.0123809
l5Sp	-0.0833186
l5Sp	-0.307675
l5Sp	0.0537337
l5Sp	-0.036646
l5Sp	-0.0433505
l5Sp	-0.161548
l5Sp	0.00304941
l5Sp	-0.200885
l5Sp	-0.0723035
l5Sp	-0.0509597
l5Sp	-0.0903677
l5Sp	-0.0621805
l5Sp	-0.0891477
l5Sp	-0.100898
l5Sp	0.0404189
l5Sp	-0.184714
l5Sp	-0.126534
l5Sp	-0.212538
l5Sp	-0.0323791
l5Sp	-0.145274
l5Sp	-0.136983
l5Sp	0.187406
l5Sp	0.025088
l5Sp	-0.12529
l5Sp	-0.00370428
l5Sp	0.0227034
l5Sp	0.0546044
l5Sp	0.163069
l5Sp	0.0793651
l5Sp	-0.0203588
l5Sp	0.0987641
l5Sp	-0.0168861
l5Sp	-0.0862466
l5Sp	-0.0634618
l5Sp	-0.0363306
l5Sp	0.016363
l5Sp	0.232488
l5Sp	0.211475
l5Sp	-0.152245
l5Sp	0.0199332
l5Sp	-0.0502178
l5Sp	0.20043
l5Sp	0.310771
l5Sp	0.0629198
l5Sp	-0.0820291
l5Sp	-0.374824
l5Sp	0.50519
l5Sp	-0.171227
l5Sp	-0.0368434
l5Sp	-0.136004
l5Sp	-0.21624
l5Sp	0.134902
l5Sp	-0.105059
l5Sp	-0.406112
l5Sp	0.0541385
l5Sp	-0.0222652
l5Sp	0.00329603
l5Sp	0.0171978
l5Sp	0.083249
l5Sp	-0.0649003
l5Sp	-0.0979837
l5Sp	-0.000218847
l5Sp	0.013553
l5Sp	-0.104278
l5Sp	0.168402
l5Sp	0.0330392
l5Sp	0.150048
l5Sp	0.312572
l5Sp	0.00358937
l5Sp	-0.0689546
l5Sp	-0.024436
l5Sp	0.459144
l5Sp	-0.110457
l5Sp	-0.114331
l5Sp	-0.154102
l5Sp	0.111435
l5Sp	0.148713
l5Sp	-0.0585589
l5Sp	0.00803487
l5Sp	-0.0538756
l5Sp	-0.00438688
l5Sp	0.00252439
l5Sp	0.0600513
l5Sp	-0.194255
l5Sp	0.0282487
l5Sp	-0.0027621
l5Sp	0.0271242
l5Sp	0.241756
l5Sp	0.155722
l5Sp	0.0417664
l5Sp	-0.000996733
l5Sp	-0.0845712
l5Sp	0.00139179
l5Sp	0.00906453
l5Sp	-0.176623
l5Sp	-0.0371038
l5Sp	-0.206148
l5Sp	0.713739
l5Sp	-0.0558882
l5Sp	-0.0256831
l5Sp	0.1245
l5Sp	-0.194412
l5Sp	-0.212381
l5Sp	-0.0949934
l5Sp	-0.0809758
l5Sp	-0.0544766
l5Sp	-0.238603
l5Sp	0.0198743
l5Sp	0.000768476
l5Sp	-0.234878
l5Sp	0.198344
l5Sp	-0.0334799
l5Sp	-0.0509163
l5Sp	-0.195195
l5Sp	0.0862132
l5Sp	-0.111475
l5Sp	-0.0194868
l5Sp	-0.198762
l5Sp	0.0131127
l5Sp	-0.12154
l5Sp	0.199339
l5Sp	0.0420411
l5Sp	0.322132
l5Sp	0.166383
l5Sp	0.0559105
l5Sp	-0.148843
l5Sp	-0.198482
l5Sp	-0.203328
l5Sp	0.0145706
l5Sp	-0.0243991
l5Sp	-0.0705436
l5Sp	-0.16264
l5Sp	-0.30327
l5Sp	-0.297475
l5Sp	-0.130118
l5Sp	0.141349
l5Sp	-0.0128956
l5Sp	-0.0546317
l5Sp	0.0518136
l5Sp	-0.059511
l5Sp	-0.0588124
l5Sp	-0.0495557
l5Sp	0.00189338
l5Sp	0.107939
l5Sp	0.176581
l5Sp	-0.200682
l5Sp	-0.0248493
l9Sp	0.13795
l9Sp	-0.0726887
l9Sp	-0.116314
l9Sp	-0.315933
l9Sp	0.119867
l9Sp	0.452655
l9Sp	-0.0677798
l9Sp	-0.218217
l9Sp	-0.0538669
l9Sp	-0.13395
l9Sp	0.142917
l9Sp	-0.229549
l9Sp	-0.134599
l9Sp	-0.579644
l9Sp	0.181949
l9Sp	0.0973797
l9Sp	-0.150632
l9Sp	0.0759287
l9Sp	0.119584
l9Sp	0.0945383
l9Sp	-0.0151668
l9Sp	0.0392844
l9Sp	0.0660294
l9Sp	0.169005
l9Sp	0.135292
l9Sp	-0.143711
l9Sp	0.0204862
l9Sp	0.181823
l9Sp	-0.019255
l9Sp	0.0299337
l9Sp	0.37878
l9Sp	-0.0679643
l9Sp	-0.0562221
l9Sp	0.0673502
l9Sp	-0.0308062
l9Sp	0.0857634
l9Sp	0.257056
l9Sp	0.0745234
l9Sp	0.00778984
l9Sp	-0.078434
l9Sp	0.0277114
l9Sp	-0.000249854
l9Sp	-0.053064
l9Sp	-0.131389
l9Sp	0.00391267
l9Sp	0.101559
l9Sp	0.122879
l9Sp	0.151214
l9Sp	-0.17152
l9Sp	-0.0135311
l9Sp	-0.0243538
l9Sp	-0.100745
l9Sp	-0.06385
l9Sp	0.0306234
l9Sp	0.0362688
l9Sp	-0.0205948
l9Sp	0.146568
l9Sp	0.00544045
l9Sp	-0.00641626
l9Sp	0.15351
l9Sp	-0.00377877
l9Sp	-0.151959
l9Sp	0.187427
l9Sp	0.12129
l9Sp	0.0798339
l9Sp	0.179134
l9Sp	0.0617345
l9Sp	-0.0835694
l9Sp	-0.0256406
l9Sp	-0.0599494
l9Sp	-0.0310684
l9Sp	-0.0591994
l9Sp	-0.0746591
l9Sp	0.00365735
l9Sp	0.0688783
l9Sp	0.140095
l9Sp	0.11992
l9Sp	-0.0547139
l9Sp	0.118168
l9Sp	0.0122625
l9Sp	0.0817213
l9Sp	-0.165636
l9Sp	-0.165999
l9Sp	0.0913713
l9Sp	-0.0391677
l9Sp	-0.236744
l9Sp	-0.13861
l9Sp	-0.13094
l9Sp	-0.148329
l9Sp	0.112173
l9Sp	-0.0581868
l9Sp	-0.0237155
l9Sp	0.0373522
l9Sp	0.0602329
l9Sp	0.0956
l9Sp	0.233973
l9Sp	0.0367858
l9Sp	0.000444534
l9Sp	0.167451
l9Sp	-0.0328962
l9Sp	0.144219
l9Sp	0.0490813
l9Sp	-0.0894816
l9Sp	-0.274018
l9Sp	-0.0377813
l9Sp	0.115766
l9Sp	0.0267057
l9Sp	0.185444
l9Sp	0.0224655
l9Sp	0.128399
l9Sp	0.0863185
l9Sp	0.23789
l9Sp	-0.818515
l9Sp	0.0648823
l9Sp	0.0050701
l9Sp	-0.00290135
l9Sp	-0.06532
l9Sp	0.127622
l9Sp	0.0507047
l9Sp	0.0560041
l9Sp	0.214836
l9Sp	0.0613062
l9Sp	0.097605
l9Sp	0.155346
l9Sp	-0.180714
l9Sp	-0.210075
l9Sp	0.213452
l9Sp	0.178403
l9Sp	0.0390148
l9Sp	-0.135312
l9Sp	0.116352
l9Sp	0.0521934
l9Sp	0.187437
l9Sp	0.00194092
l9Sp	0.0837101
l9Sp	0.0814881
l9Sp	-0.323466
l9Sp	0.145435
l9Sp	0.137753
l9Sp	0.627748
l9Sp	0.261708
l9Sp	0.309381
l9Sp	0.0792534
l9Sp	0.0826243
l9Sp	0.0236867
l9Sp	0.0563193
l9Sp	0.134034
l9Sp	0.432896
l9Sp	0.220303
l9Sp	0.0481293
l9Sp	-0.091397
l9Sp	-0.00972403
l9Sp	0.189757
l9Sp	-0.109588
l9Sp	0.0151214
l9Sp	0.136364
l9Sp	0.0852915
l9Sp	0.0976995
l9Sp	0.0501173
l9Sp	-0.11288
l9Sp	-0.0726001
l9Sp	0.0525832
l6Sp	-0.302049
l6Sp	0.060866
l6Sp	-0.190443
l6Sp	-0.161446
l6Sp	0.0839696
l6Sp	-0.0197463
l6Sp	-0.266799
l6Sp	-0.158928
l6Sp	-0.12754
l6Sp	-0.0780395
l6Sp	-0.448657
l6Sp	-0.222878
l6Sp	-0.0922642
l6Sp	-0.302249
l6Sp	-0.223836
l6Sp	-0.108637
l6Sp	0.0682794
l6Sp	-0.388339
l6Sp	-0.157256
l6Sp	-0.181751
l6Sp	-0.164817
l6Sp	-0.101816
l6Sp	-0.156059
l6Sp	-0.1816
l6Sp	-0.239365
l6Sp	0.0710477
l6Sp	-0.17474
l6Sp	-0.182093
l6Sp	-0.13712
l6Sp	-0.167434
l6Sp	-0.377646
l6Sp	-0.0549793
l6Sp	-0.192053
l6Sp	-0.0459888
l6Sp	-0.0834797
l6Sp	-0.08997
l6Sp	-0.419523
l6Sp	-0.112449
l6Sp	-0.113494
l6Sp	-0.117655
l6Sp	-0.249471
l6Sp	0.0519017
l6Sp	-0.0762958
l6Sp	-0.0388357
l6Sp	-0.10422
l6Sp	-0.216094
l6Sp	-0.101115
l6Sp	0.048172
l6Sp	-0.252099
l6Sp	-0.145538
l6Sp	-0.17025
l6Sp	-0.175234
l6Sp	-0.187652
l6Sp	-0.202151
l6Sp	-0.125139
l6Sp	-0.0863888
l6Sp	-0.187244
l6Sp	-0.183673
l6Sp	-0.22409
l6Sp	-0.00714385
l6Sp	-0.14275
l6Sp	-0.485653
l6Sp	0.224597
l6Sp	-0.0831538
l6Sp	-0.134252
l6Sp	-0.322119
l6Sp	-0.157049
l6Sp	-0.258806
l6Sp	-0.0476701
l6Sp	-0.163992
l6Sp	-0.144156
l6Sp	-0.141954
l6Sp	-0.128527
l6Sp	-0.171079
l6Sp	-0.0365989
l6Sp	-0.269212
l6Sp	-0.149488
l6Sp	-0.181495
l6Sp	-0.162856
l6Sp	-0.225195
l6Sp	-0.0980952
l6Sp	0.0170662
l6Sp	-0.114354
l6Sp	-0.172715
l6Sp	0.0336449
l6Sp	-0.407666
l6Sp	-0.210056
l6Sp	-0.181559
l6Sp	-0.15653
l6Sp	-0.14351
l6Sp	-0.0640891
l6Sp	-0.126582
l6Sp	-0.138787
l6Sp	-0.185045
l6Sp	-0.00754348
l6Sp	-0.10145
l6Sp	-0.0787839
l6Sp	-0.316273
l6Sp	-0.164848
l6Sp	-0.160544
l6Sp	-0.119927
l6Sp	-0.146118
l6Sp	-0.123102
l6Sp	0.0299282
l6Sp	-0.159513
l6Sp	-0.072717
l6Sp	-0.110449
l6Sp	-0.333166
l6Sp	-0.0934786
l6Sp	-0.12373
l6Sp	-0.12249
l6Sp	-0.0531851
l6Sp	-0.322438
l6Sp	-0.118294
l6Sp	-0.0763247
l6Sp	-0.130146
l6Sp	-0.058213
l6Sp	-0.15349
l6Sp	-0.048604
l6Sp	-0.109737
l6Sp	-0.232353
l6Sp	-0.19833
l6Sp	-0.139416
l6Sp	-0.0400784
l6Sp	-0.271912
l6Sp	-9.33653e-06
l6Sp	-0.0831286
l6Sp	-0.104569
l6Sp	0.0452098
l6Sp	-0.111277
l6Sp	-0.0669702
l6Sp	-0.193024
l6Sp	-0.237037
l6Sp	-0.17872
l6Sp	-0.161665
l6Sp	-0.293451
l6Sp	-0.105725
l6Sp	-0.187436
l6Sp	-0.310366
l6Sp	-0.101787
l6Sp	-0.0548338
l6Sp	-0.127391
l6Sp	-0.205366
l6Sp	-0.0623721
l6Sp	-0.166716
l6Sp	-0.17345
l6Sp	-0.0346642
l6Sp	-0.193158
l6Sp	0.0998397
l6Sp	0.030527
l6Sp	0.119325
l6Sp	-0.0124368
l6Sp	-0.173748
l6Sp	-0.26032
l6Sp	0.0499616
l6Sp	-0.131612
l6Sp	-0.123757
l6Sp	-0.285839
l6Sp	-0.24739
l6Sp	-0.184122
l6Sp	-0.162838
l6Sp	-0.133312
l7Sp	-0.305026
l7Sp	-0.00442295
l7Sp	-0.0693374
l7Sp	0.0511894
l7Sp	-0.491463
l7Sp	0.0632624
l7Sp	-0.144366
l7Sp	-0.205507
l7Sp	-0.204993
l7Sp	-0.106099
l7Sp	0.227142
l7Sp	-0.156168
l7Sp	-0.154053
l7Sp	0.80475
l7Sp	0.00534946
l7Sp	-0.130791
l7Sp	-0.0110767
l7Sp	-0.120109
l7Sp	-0.191728
l7Sp	-0.212421
l7Sp	-0.063189
l7Sp	-0.163794
l7Sp	-0.0922086
l7Sp	-0.139972
l7Sp	-0.119667
l7Sp	0.0768667
l7Sp	-0.10263
l7Sp	0.00889636
l7Sp	-0.0984951
l7Sp	0.0237104
l7Sp	0.0693468
l7Sp	-0.269795
l7Sp	0.0101244
l7Sp	-0.0349668
l7Sp	0.184986
l7Sp	0.0986186
l7Sp	-0.139116
l7Sp	-0.153149
l7Sp	-0.0587609
l7Sp	-0.186818
l7Sp	-0.157574
l7Sp	-0.187492
l7Sp	0.00134399
l7Sp	-0.179096
l7Sp	-0.276821
l7Sp	-0.141272
l7Sp	-0.150447
l7Sp	-0.186738
l7Sp	0.160349
l7Sp	-0.123205
l7Sp	-0.219089
l7Sp	-0.153146
l7Sp	0.136998
l7Sp	-0.139465
l7Sp	-0.100734
[truncated: 7,073 more rows]
