# Supplementary material for: A robust method for measuring aminoacylation through tRNA-Seq
Source: eLife. 2024 Jul 30;12:RP91554. doi: 10.7554/eLife.91554 (PMC11288633; doi:10.7554/eLife.91554)
Supplement: Figure 6—figure supplement 1—source data 1. [file elife-91554-fig6-figsupp1-data1.xlsx]

## Sheet: Fig6S1B
mean_tRNAseq	std_tRNAseq	mean_Peacock	std_Peacock
405.745	41.9696	95	20
210.546	22.6183	96	10
279.678	37.6917	93	7
425.85	7.07081	132	20
2816.23	145.677	810	30
541.82	46.5674	147	4
466.103	22.1471	127	20
452.032	17.2566	127	5
138.268	17.6667	36	2
681.754	45.7412	202	10
550.462		141	30
2241.38	178.188	644	40
