# Supplementary material for: A robust method for measuring aminoacylation through tRNA-Seq
Source: eLife. 2024 Jul 30;12:RP91554. doi: 10.7554/eLife.91554 (PMC11288633; doi:10.7554/eLife.91554)
Supplement: Figure 6—figure supplement 2—source data 1. [file elife-91554-fig6-figsupp2-data1.xlsx]

## Sheet: Fig6S2
replicate	Time	charge	Transcript
1	0	96.7725	Ile-AAT-5-4
2	0	96.6611	Ile-AAT-5-4
3	0	96.5256	Ile-AAT-5-4
4	0	96.9582	Ile-AAT-5-4
1	960	78.1467	Ile-AAT-5-4
2	960	76.2035	Ile-AAT-5-4
3	960	75.2631	Ile-AAT-5-4
4	960	77.7574	Ile-AAT-5-4
1	16	95.9439	Ile-AAT-5-4
2	16	96.3989	Ile-AAT-5-4
3	16	96.1099	Ile-AAT-5-4
4	16	96.5116	Ile-AAT-5-4
1	60	95.386	Ile-AAT-5-4
2	60	95.2212	Ile-AAT-5-4
3	60	94.8081	Ile-AAT-5-4
4	60	95.4905	Ile-AAT-5-4
1	120	94.2368	Ile-AAT-5-4
2	120	93.1856	Ile-AAT-5-4
3	120	94.2367	Ile-AAT-5-4
4	120	93.8934	Ile-AAT-5-4
1	32	95.9423	Ile-AAT-5-4
2	32	95.9553	Ile-AAT-5-4
3	32	95.7715	Ile-AAT-5-4
4	32	95.9159	Ile-AAT-5-4
1	2400	53.4245	Ile-AAT-5-4
2	2400	52.8007	Ile-AAT-5-4
3	2400	57.261	Ile-AAT-5-4
4	2400	54.0902	Ile-AAT-5-4
1	240	91.2467	Ile-AAT-5-4
2	240	91.5293	Ile-AAT-5-4
3	240	90.9604	Ile-AAT-5-4
4	240	90.8093	Ile-AAT-5-4
1	4	96.381	Ile-AAT-5-4
2	4	96.4568	Ile-AAT-5-4
3	4	97.0667	Ile-AAT-5-4
4	4	96.5275	Ile-AAT-5-4
1	480	86.7665	Ile-AAT-5-4
2	480	85.7708	Ile-AAT-5-4
3	480	86.1302	Ile-AAT-5-4
4	480	85.2124	Ile-AAT-5-4
1	8	96.243	Ile-AAT-5-4
2	8	96.4069	Ile-AAT-5-4
3	8	96.7284	Ile-AAT-5-4
4	8	96.59	Ile-AAT-5-4
1	0	97.3081	Gln-TTG-2-1
2	0	97.9665	Gln-TTG-2-1
3	0	96.8984	Gln-TTG-2-1
4	0	98.2247	Gln-TTG-2-1
1	960	8.89488	Gln-TTG-2-1
2	960	8.53432	Gln-TTG-2-1
3	960	9.12824	Gln-TTG-2-1
4	960	10.7244	Gln-TTG-2-1
1	16	95.5961	Gln-TTG-2-1
2	16	94.7279	Gln-TTG-2-1
3	16	95.2889	Gln-TTG-2-1
4	16	96.6198	Gln-TTG-2-1
1	60	87.8685	Gln-TTG-2-1
2	60	92.5061	Gln-TTG-2-1
3	60	86.189	Gln-TTG-2-1
4	60	88.2038	Gln-TTG-2-1
1	120	84.8365	Gln-TTG-2-1
2	120	76.0214	Gln-TTG-2-1
3	120	77.7061	Gln-TTG-2-1
4	120	77.4436	Gln-TTG-2-1
1	32	92.0667	Gln-TTG-2-1
2	32	92.263	Gln-TTG-2-1
3	32	92.5027	Gln-TTG-2-1
4	32	92.0794	Gln-TTG-2-1
1	2400	0.787815	Gln-TTG-2-1
2	2400	0.983607	Gln-TTG-2-1
3	2400	1.64995	Gln-TTG-2-1
4	2400	1.91257	Gln-TTG-2-1
1	240	60.146	Gln-TTG-2-1
2	240	60.1755	Gln-TTG-2-1
3	240	59.95	Gln-TTG-2-1
4	240	54.0586	Gln-TTG-2-1
1	4	97.6608	Gln-TTG-2-1
2	4	95.3455	Gln-TTG-2-1
3	4	97.2456	Gln-TTG-2-1
4	4	96.7754	Gln-TTG-2-1
1	480	32.6082	Gln-TTG-2-1
2	480	31.2235	Gln-TTG-2-1
3	480	27.6551	Gln-TTG-2-1
4	480	33.9617	Gln-TTG-2-1
1	8	95.5275	Gln-TTG-2-1
2	8	96.9214	Gln-TTG-2-1
3	8	96.8519	Gln-TTG-2-1
4	8	96.2552	Gln-TTG-2-1
