# Supplementary material for: A robust method for measuring aminoacylation through tRNA-Seq
Source: eLife. 2024 Jul 30;12:RP91554. doi: 10.7554/eLife.91554 (PMC11288633; doi:10.7554/eLife.91554)
Supplement: Figure 6—source data 1. [file elife-91554-fig6-data1.xlsx]

## Sheet: Fig6A
replicate	Time	charge
1	0	95.9949
2	0	96.0633
3	0	95.6459
4	0	95.9621
1	960	22.0519
2	960	21.4506
3	960	23.3377
4	960	22.1725
1	16	92.4554
2	16	93.8848
3	16	94.0211
4	16	93.7648
1	60	88.7191
2	60	86.4791
3	60	89.1778
4	60	88.1839
1	120	79.8364
2	120	82.8087
3	120	80.9286
4	120	80.3753
1	32	90.5282
2	32	92.1312
3	32	90.3267
4	32	92.0059
1	2400	2.68567
2	2400	2.98169
3	2400	3.03979
4	2400	2.48295
1	240	70.0776
2	240	66.769
3	240	67.4752
4	240	66.7588
1	4	94.6868
2	4	95.0668
3	4	95.1832
4	4	95.2619
1	480	46.5292
2	480	46.4413
3	480	46.193
4	480	47.5984
1	8	94.5105
2	8	93.6585
3	8	94.9821
4	8	95.3468

## Sheet: Fig6B
amino_acid	hl
Ala	378.448
Arg	226.509
Asn	94.9608
Asp	873.645
Cys	170.721
Gln	346.389
Glu	657.269
Gly	603.326
His	420.85
Ile	2971.79
Leu	524.957
Leu	561.982
Lys	465.216
Phe	426.331
Pro	181.314
Ser	564.719
Thr	1007.63
Trp	648.529
Tyr	550.462
Val	2370.55
Ala	419.692
Ala	361.004
Ala	396.398
Ala	395.271
Ala	399.086
Ala	413.735
Ala	398.019
Ala	386.895
Ala	388.979
Ala	381.3
Ala	411.726
Ala	557.91
Ala	404.752
Ala	390.825
Ala	392.899
Ala	374.576
Ala	400.979
Ala	456.665
Arg	221.497
Arg	242.877
Arg	211.295
Arg	228.648
Arg	216.145
Arg	208.425
Arg	236.066
Arg	212.76
Arg	223.294
Arg	209.13
Arg	218.129
Arg	215.507
Arg	203.438
Arg	230.833
Arg	228.691
Arg	214.981
Asn	88.0319
Asn	87.0768
Asn	84.95
Asn	84.188
Asp	898.937
Asp	979.911
Cys	220.156
Cys	214.821
Cys	226.086
Cys	220.946
Gln	251.041
Gln	254.965
Gln	267.222
Gln	292.41
Gln	306.27
Gln	239.448
Glu	661.478
Glu	596.514
Glu	596.179
Glu	601.802
Gly	703.384
Gly	739.749
Gly	660.812
Gly	699.909
Gly	728.048
Gly	720.792
Gly	729.03
His	430.849
Ile	2679.64
Ile	2648.7
Ile	2811.41
Ile	2851.23
Ile	3024.77
Ile	2891.18
Ile	2651.07
Leu	597.176
Leu	524.986
Leu	508.725
Leu	478.973
Leu	536.203
Leu	601.548
Leu	593.83
Leu	456.263
Leu	528.882
Leu	612.649
Leu	528.416
Leu	530.893
Lys	479.328
Lys	470.18
Lys	503.204
Lys	436.475
Lys	464.432
Lys	443.887
Met	459.971
Met	463.464
Met	474.926
Met	463.786
Phe	457.953
Phe	462.942
Phe	460.904
Pro	129.249
Pro	138.911
Pro	131.544
Pro	133.782
Pro	130.237
Pro	129.793
Pro	131.309
Ser	739.798
Ser	722.65
Ser	657.091
Ser	699.839
Ser	701.678
Ser	720.225
Ser	682.204
Ser	683.93
Ser	719.808
Ser	643.915
Ser	664.663
Ser	662.287
Thr	875.501
Thr	745.162
Thr	862.617
Thr	807.634
Thr	833.162
Thr	867.986
Thr	893.792
Thr	840.876
Thr	842.227
Thr	846.584
Thr	870.599
Thr	895.71
Thr	838.77
Thr	837.821
Thr	897.276
Trp	713.729
Trp	683.912
Trp	695.854
Trp	719.703
Val	2001.51
Val	2030.52
Val	2492.58
Val	2086.28
Val	2093.6
Val	2280.58
Val	2448.61
Val	2252.13
Val	2357.48

## Sheet: Fig6C
discr_base	amino_acid	hl
G	Gln	346.389
A	Thr	1007.63
U	Gln	251.041
U	Gln	254.965
U	Gln	267.222
U	Gln	292.41
U	Gln	306.27
U	Gln	239.448
U	Thr	875.501
U	Thr	745.162
U	Thr	862.617
U	Thr	807.634
U	Thr	833.162
U	Thr	867.986
U	Thr	893.792
U	Thr	840.876
U	Thr	842.227
U	Thr	846.584
U	Thr	870.599
U	Thr	895.71
U	Thr	838.77
U	Thr	837.821
U	Thr	897.276
