# Supplementary material for: A robust method for measuring aminoacylation through tRNA-Seq
Source: eLife. 2024 Jul 30;12:RP91554. doi: 10.7554/eLife.91554 (PMC11288633; doi:10.7554/eLife.91554)
Supplement: Supplementary file 4. [file elife-91554-supp4.xlsx]

## Sheet: Sheet1
TGIRT vs. Maxima read mapping statistics. Each row is an individual RNA sample, barcoded, pooled and used for RT-PCR template with both TGIRT-III and Maxima.
	Mapping success (%)			Multiple annotations (%)			Multiple codons (%)
	TGIRT	Maxima		TGIRT	Maxima		TGIRT	Maxima
	96.8	95.2		27.5	35.5		3.4	6.1
	93.8	92		27.5	35.8		3.5	6.2
	96.8	95.2		27.7	35.4		3.5	6
	92.3	90.4		27.3	35.6		3.6	6.3
	95.3	93.6		27.5	35.7		3.5	6.3
	93.8	92		27.6	36		3.6	6.3
	92	90.3		27.8	36.2		3.6	6.6
Mean	94.4	92.7		27.6	35.8		3.5	6.3
