# Supplementary figures and images for: A robust method for measuring aminoacylation through tRNA-Seq
Source: eLife journal article supplement (doi:10.7554/elife.91554), 2023-11-13

# Lysine-cleavage\_time\_07-22-23

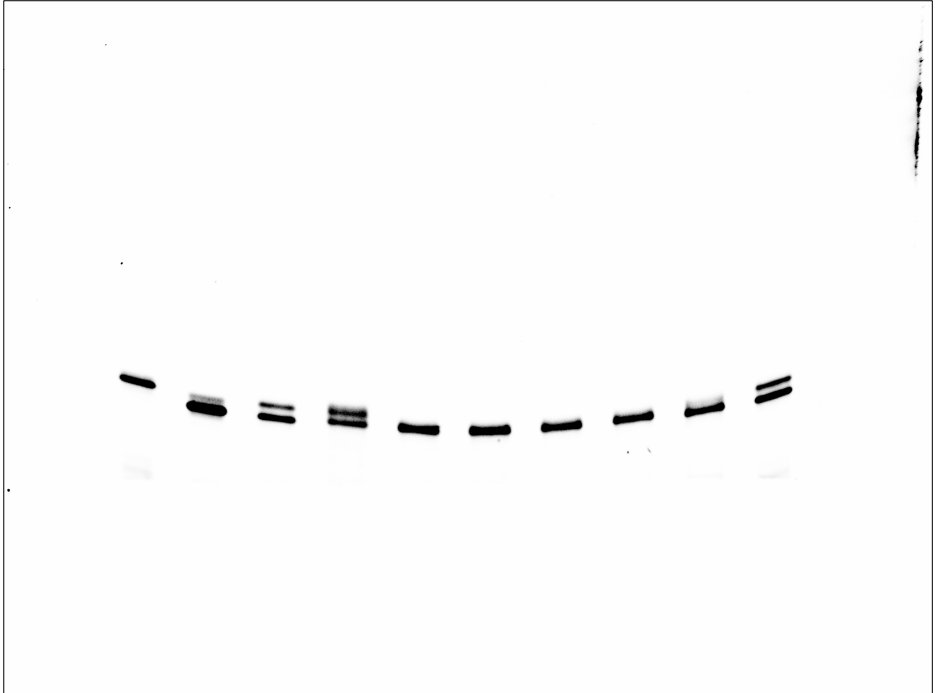

Supplement: fig2-data2 [file elife-91554-fig2-data2-v1.zip]

## oxidation\_test\_8

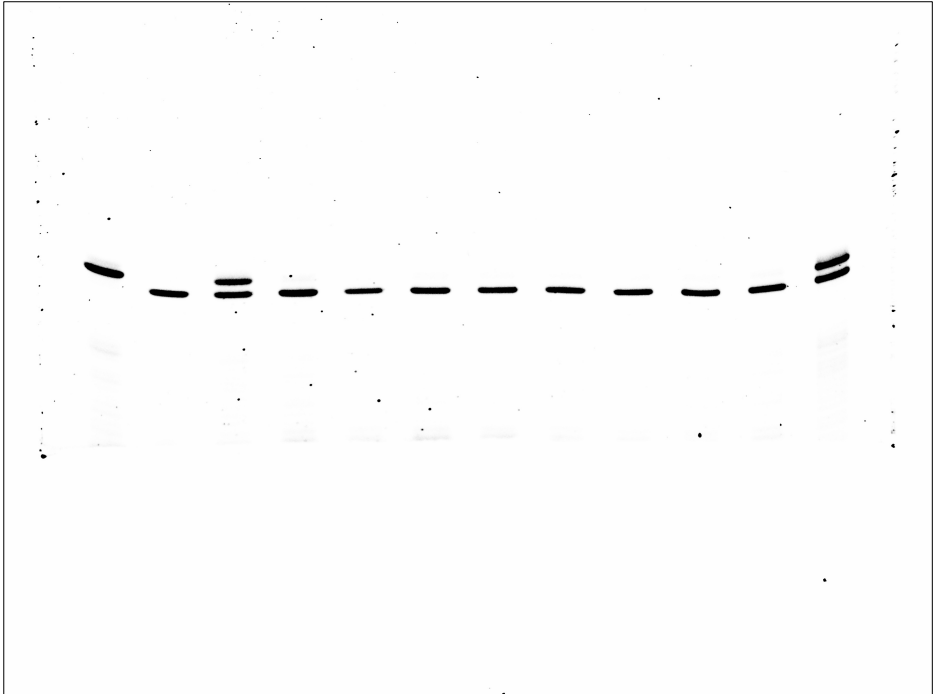

Supplement: fig2-data2 [file elife-91554-fig2-data2-v1.zip]

# ligation-test\_l1Sp

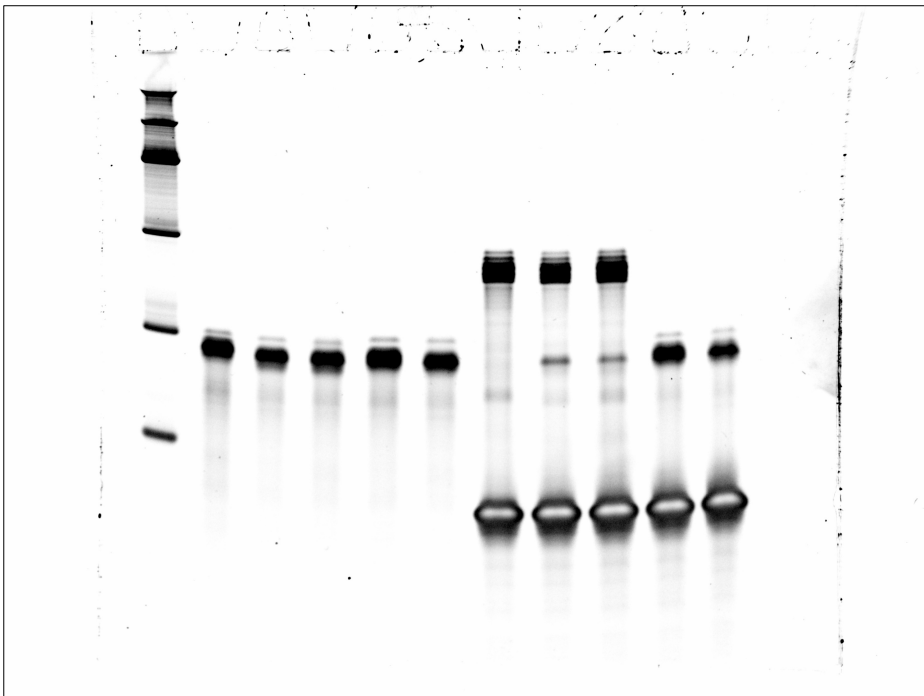

Supplement: fig2-data2 [file elife-91554-fig2-data2-v1.zip]

## ecoli-Lys\_cleavage-test

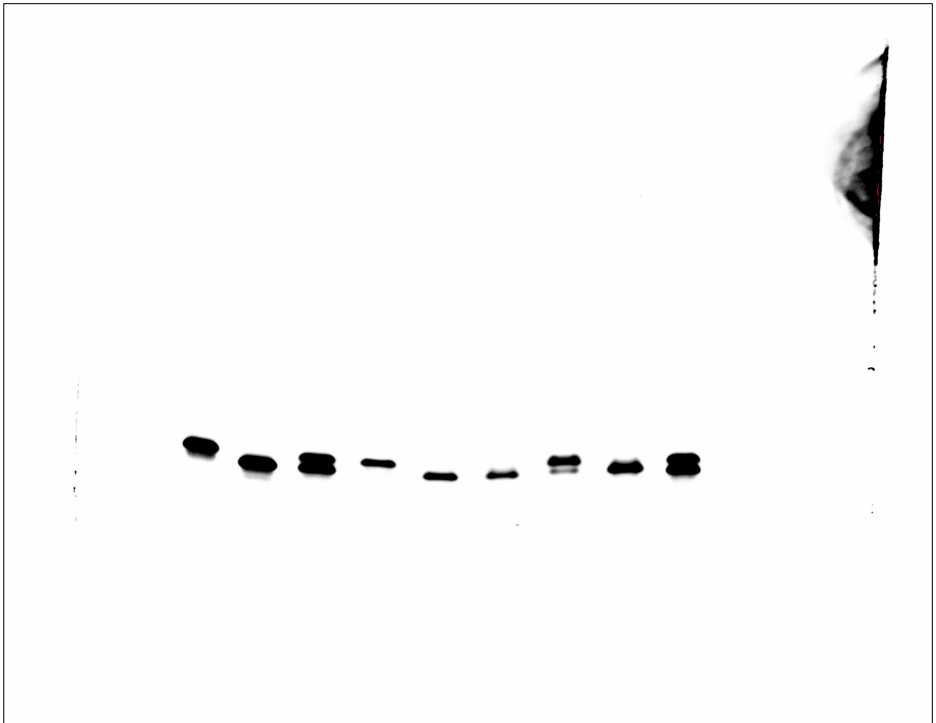

Supplement: fig2-data2 [file elife-91554-fig2-data2-v1.zip]

pH-opti

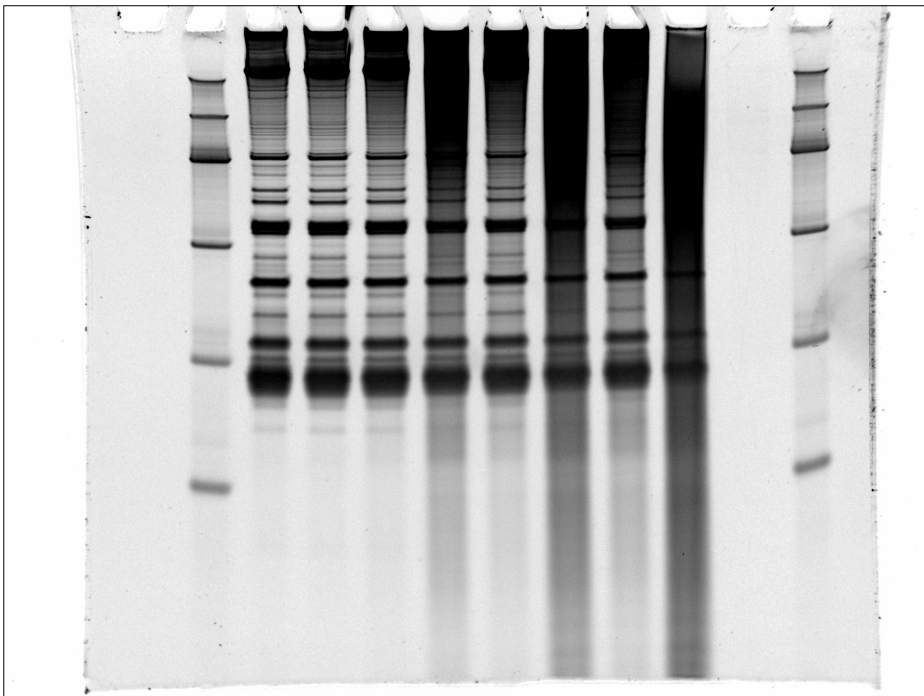

Location: C:/Users/mshared/Desktop/Sullivan Lab/krdav/tRNAseq\_pub/pH

Printed: 3/30/2023 6:11 PM

Page 1 of 1

Supplement: fig2-figsupp1-data3 [file elife-91554-fig2-figsupp1-data3-v1.zip]

## non-complementary-splint-ligation

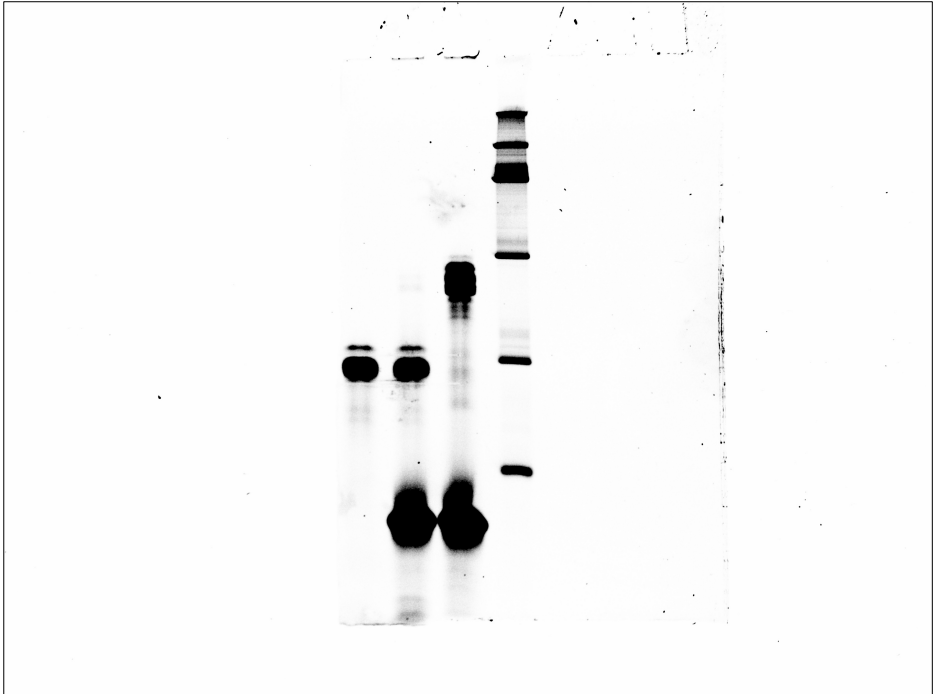

Supplement: fig2-figsupp4-data1 [file elife-91554-fig2-figsupp4-data1-v1.zip]

## ligation-test\_I3Sp

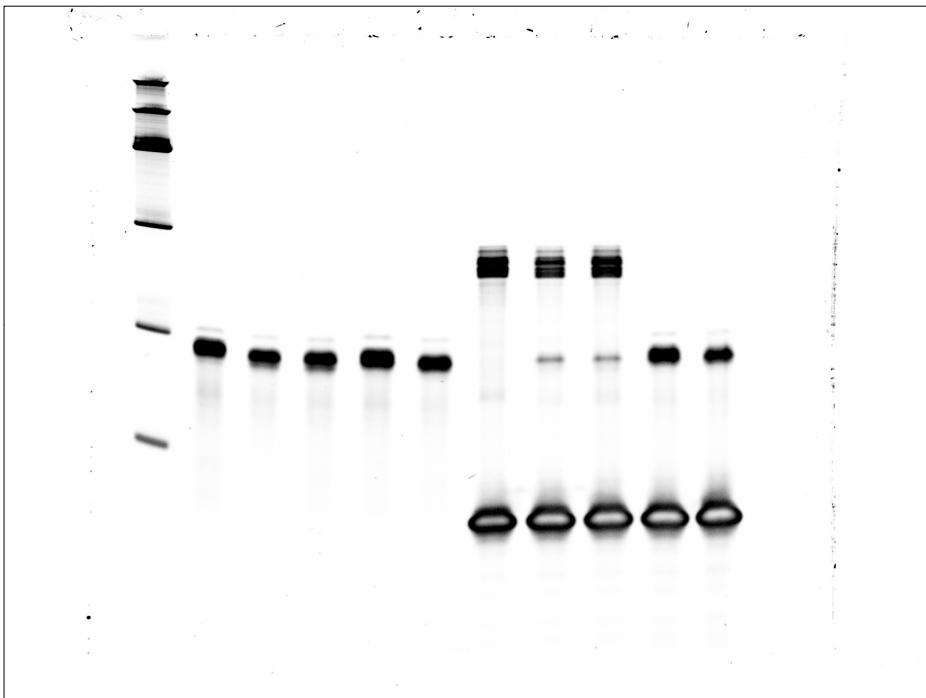

Supplement: fig2-figsupp5-data1 [file elife-91554-fig2-figsupp5-data1-v1.zip]

## ligation-test\_I2Sp

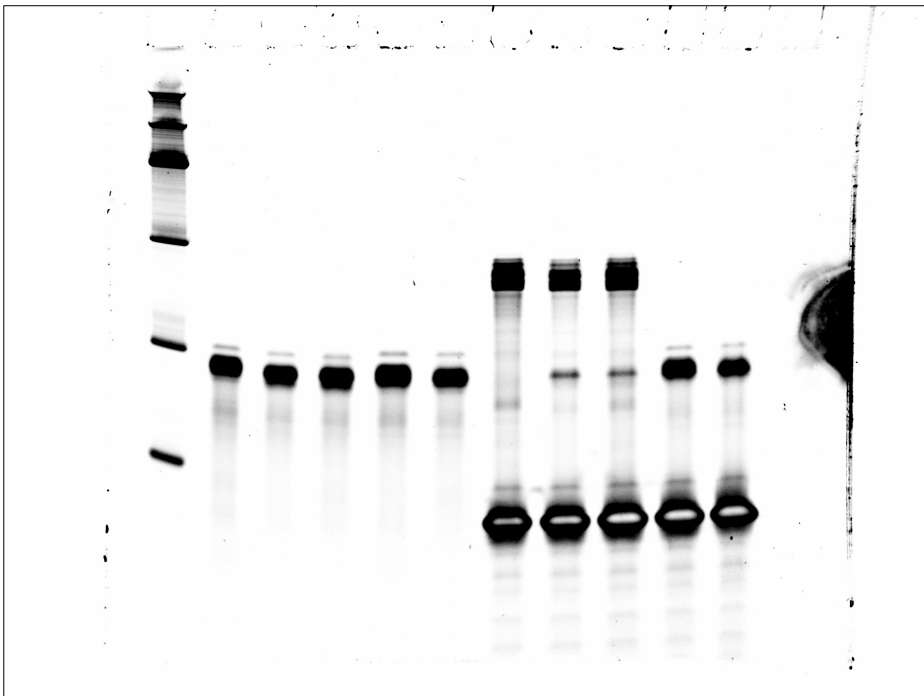

Supplement: fig2-figsupp5-data1 [file elife-91554-fig2-figsupp5-data1-v1.zip]

## RT-PCR\_test

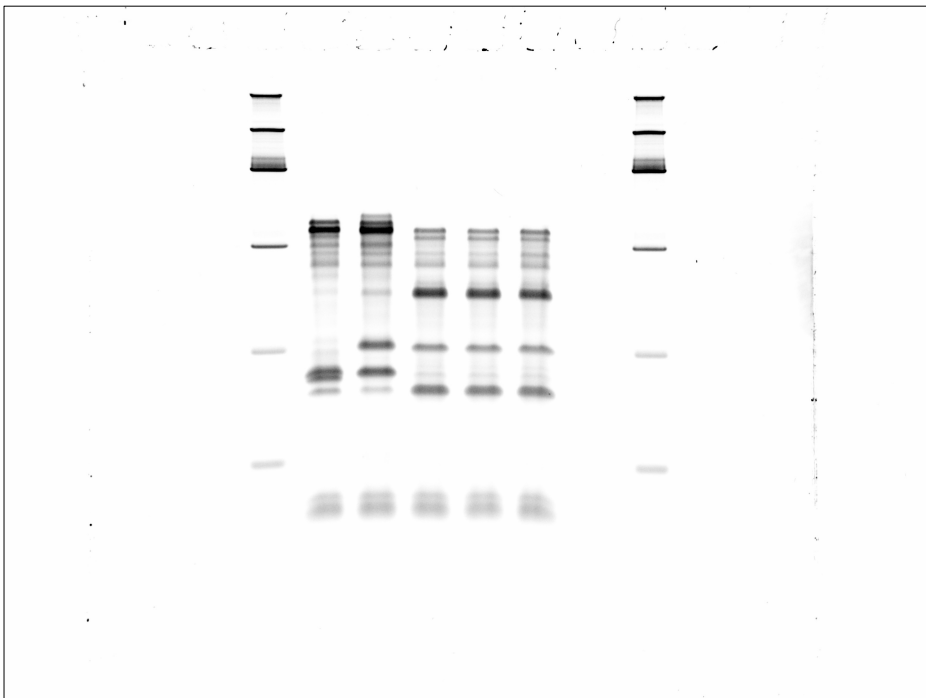

Supplement: fig2-figsupp6-data2 [file elife-91554-fig2-figsupp6-data2-v1.zip]

## RNA\_stability\_after\_incubation\_short-exp

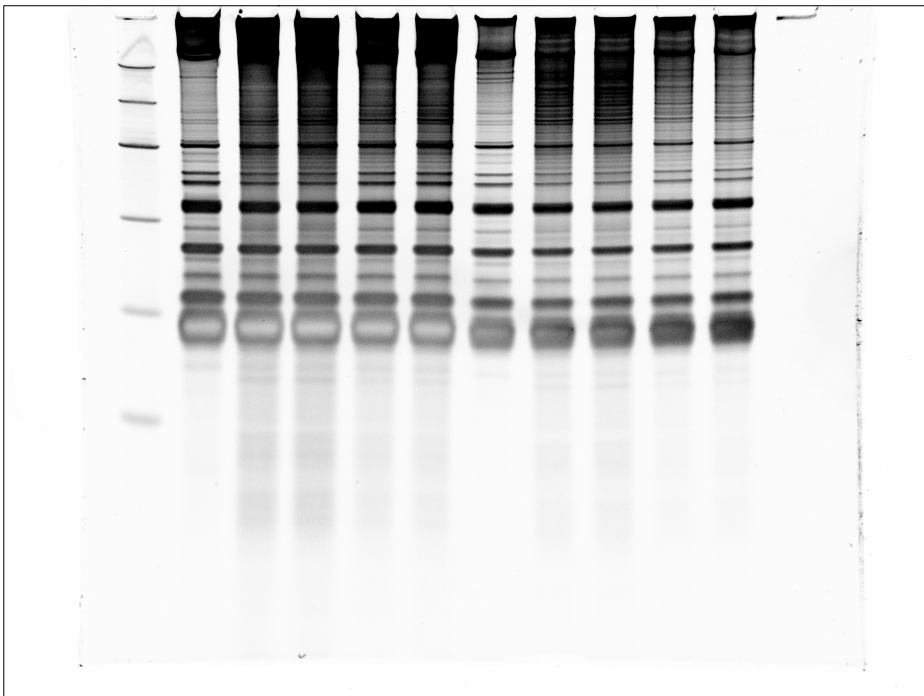

Supplement: fig6-figsupp1-data2 [file elife-91554-fig6-figsupp1-data2-v1.zip]
